# Supplementary material for: OSBPL3 Regulates Colorectal Cancer Progression by Modulating Gut Microbiota and Tumor Immune Microenvironment
Source: Research Square preprint supplement (doi:10.21203/rs.3.rs-8559173/v1), 2026-02-16
Supplement: Supplementary file 1 [file 1f93815e66bf162061b8bb58.xlsx]

## Sheet: Sheet1
Group	C	C	C	C	C	C	B	B	B	B	B	B
ASV ID	C6	C5	C4	C3	C2	C1	B6	B5	B4	B3	B2	B1
d__Bacteria	99.9828	99.9893	99.9904	99.985	99.9668	99.9895	99.968	99.9593	99.6372	100	99.9785	99.9247
d__Bacteria|p__Acidobacteriota	0	0	0	0	0	0	0	0	0	0	0	0
d__Bacteria|p__Acidobacteriota|c__Blastocatellia	0	0	0	0	0	0	0	0	0	0	0	0
d__Bacteria|p__Acidobacteriota|c__Blastocatellia|o__Pyrinomonadales	0	0	0	0	0	0	0	0	0	0	0	0
d__Bacteria|p__Acidobacteriota|c__Blastocatellia|o__Pyrinomonadales|f__Pyrinomonadaceae	0	0	0	0	0	0	0	0	0	0	0	0
d__Bacteria|p__Acidobacteriota|c__Blastocatellia|o__Pyrinomonadales|f__Pyrinomonadaceae|g__RB41	0	0	0	0	0	0	0	0	0	0	0	0
d__Bacteria|p__Acidobacteriota|c__Blastocatellia|o__Pyrinomonadales|f__Pyrinomonadaceae|g__RB41|s__RB41_unclassified	0	0	0	0	0	0	0	0	0	0	0	0
d__Bacteria|p__Actinobacteriota	0.62389	0.61477	2.26326	0.65839	0.45182	0.56255	0.79416	0.69331	0.65551	1.93311	1.19132	0.3981
d__Bacteria|p__Actinobacteriota|c__Actinobacteria	0.04343	0.18244	0.14257	0.10475	0.18766	0.13005	0.31705	0.14711	0.2622	0.13898	0.17547	0.09223
d__Bacteria|p__Actinobacteriota|c__Actinobacteria|o__Actinomycetales	0	0	0.01234	0	0.00722	0.00907	0	0	0	0	0.00616	0
d__Bacteria|p__Actinobacteriota|c__Actinobacteria|o__Actinomycetales|f__Actinomycetaceae	0	0	0.01234	0	0.00722	0.00907	0	0	0	0	0.00616	0
d__Bacteria|p__Actinobacteriota|c__Actinobacteria|o__Actinomycetales|f__Actinomycetaceae|g__Actinomyces	0	0	0.01234	0	0.00722	0.00907	0	0	0	0	0.00616	0
d__Bacteria|p__Actinobacteriota|c__Actinobacteria|o__Actinomycetales|f__Actinomycetaceae|g__Actinomyces|s__Actinomyces_unclassified	0	0	0.01234	0	0.00722	0.00907	0	0	0	0	0.00616	0
d__Bacteria|p__Actinobacteriota|c__Actinobacteria|o__Bifidobacteriales	0.04343	0.09812	0.07951	0.01796	0.02598	0.02117	0.16005	0.01165	0.10824	0.05934	0.09235	0.0123
d__Bacteria|p__Actinobacteriota|c__Actinobacteria|o__Bifidobacteriales|f__Bifidobacteriaceae	0.04343	0.09812	0.07951	0.01796	0.02598	0.02117	0.16005	0.01165	0.10824	0.05934	0.09235	0.0123
d__Bacteria|p__Actinobacteriota|c__Actinobacteria|o__Bifidobacteriales|f__Bifidobacteriaceae|g__Bifidobacterium	0.04343	0.09812	0.07951	0.01796	0.02598	0.02117	0.16005	0.01165	0.10824	0.05934	0.09235	0.0123
d__Bacteria|p__Actinobacteriota|c__Actinobacteria|o__Bifidobacteriales|f__Bifidobacteriaceae|g__Bifidobacterium|s__Bifidobacterium_unclassified	0.04343	0.09812	0.07951	0.01796	0.02598	0.02117	0.16005	0.01165	0.10824	0.05934	0.09235	0.0123
d__Bacteria|p__Actinobacteriota|c__Actinobacteria|o__Corynebacteriales	0	0.04139	0.03153	0.06285	0.10538	0.08015	0.07469	0.08739	0.12805	0.03748	0.04002	0.06763
d__Bacteria|p__Actinobacteriota|c__Actinobacteria|o__Corynebacteriales|f__Corynebacteriaceae	0	0.04139	0.03153	0.06285	0.10538	0.08015	0.07469	0.08739	0.12805	0.03748	0.04002	0.06763
d__Bacteria|p__Actinobacteriota|c__Actinobacteria|o__Corynebacteriales|f__Corynebacteriaceae|g__Corynebacterium	0	0.04139	0.03153	0.06285	0.10538	0.08015	0.07469	0.08739	0.12805	0.03748	0.04002	0.06763
d__Bacteria|p__Actinobacteriota|c__Actinobacteria|o__Corynebacteriales|f__Corynebacteriaceae|g__Corynebacterium|s__Corynebacterium_unclassified	0	0.04139	0.03153	0.06285	0.10538	0.08015	0.07469	0.08739	0.12805	0.03748	0.04002	0.06763
d__Bacteria|p__Actinobacteriota|c__Actinobacteria|o__Micrococcales	0	0.04293	0.01919	0.02394	0.04908	0.01966	0.08231	0.04807	0.02591	0.04216	0.03694	0.0123
d__Bacteria|p__Actinobacteriota|c__Actinobacteria|o__Micrococcales|f__Bogoriellaceae	0	0	0	0	0	0	0	0	0	0	0	0
d__Bacteria|p__Actinobacteriota|c__Actinobacteria|o__Micrococcales|f__Bogoriellaceae|g__Georgenia	0	0	0	0	0	0	0	0	0	0	0	0
d__Bacteria|p__Actinobacteriota|c__Actinobacteria|o__Micrococcales|f__Bogoriellaceae|g__Georgenia|s__Georgenia_unclassified	0	0	0	0	0	0	0	0	0	0	0	0
d__Bacteria|p__Actinobacteriota|c__Actinobacteria|o__Micrococcales|f__Brevibacteriaceae	0	0	0.00411	0	0	0	0	0	0	0	0	0
d__Bacteria|p__Actinobacteriota|c__Actinobacteria|o__Micrococcales|f__Brevibacteriaceae|g__Brevibacterium	0	0	0.00411	0	0	0	0	0	0	0	0	0
d__Bacteria|p__Actinobacteriota|c__Actinobacteria|o__Micrococcales|f__Brevibacteriaceae|g__Brevibacterium|s__Brevibacterium_unclassified	0	0	0.00411	0	0	0	0	0	0	0	0	0
d__Bacteria|p__Actinobacteriota|c__Actinobacteria|o__Micrococcales|f__Micrococcaceae	0	0.04293	0.01508	0.02394	0.04908	0.01966	0.08231	0.04807	0.02591	0.04216	0.03694	0.0123
d__Bacteria|p__Actinobacteriota|c__Actinobacteria|o__Micrococcales|f__Micrococcaceae|g__Glutamicibacter	0	0	0	0	0	0	0	0	0.00457	0	0	0
d__Bacteria|p__Actinobacteriota|c__Actinobacteria|o__Micrococcales|f__Micrococcaceae|g__Glutamicibacter|s__Glutamicibacter_unclassified	0	0	0	0	0	0	0	0	0.00457	0	0	0
d__Bacteria|p__Actinobacteriota|c__Actinobacteria|o__Micrococcales|f__Micrococcaceae|g__Micrococcus	0	0	0	0	0	0	0.01067	0.01457	0	0	0	0
d__Bacteria|p__Actinobacteriota|c__Actinobacteria|o__Micrococcales|f__Micrococcaceae|g__Micrococcus|s__Micrococcus_unclassified	0	0	0	0	0	0	0.01067	0.01457	0	0	0	0
d__Bacteria|p__Actinobacteriota|c__Actinobacteria|o__Micrococcales|f__Micrococcaceae|g__Neomicrococcus	0	0	0	0	0.01732	0	0.01219	0	0	0.00781	0.01539	0
d__Bacteria|p__Actinobacteriota|c__Actinobacteria|o__Micrococcales|f__Micrococcaceae|g__Neomicrococcus|s__Neomicrococcus_unclassified	0	0	0	0	0.01732	0	0.01219	0	0	0.00781	0.01539	0
d__Bacteria|p__Actinobacteriota|c__Actinobacteria|o__Micrococcales|f__Micrococcaceae|g__Rothia	0	0.04293	0.01508	0.02394	0.03176	0.01966	0.05945	0.0335	0.02134	0.03435	0.02155	0.0123
d__Bacteria|p__Actinobacteriota|c__Actinobacteria|o__Micrococcales|f__Micrococcaceae|g__Rothia|s__Rothia_unclassified	0	0.04293	0.01508	0.02394	0.03176	0.01966	0.05945	0.0335	0.02134	0.03435	0.02155	0.0123
d__Bacteria|p__Actinobacteriota|c__Actinobacteriota	0.01013	0.04446	0.17273	0.03142	0.05774	0.0862	0.07317	0.16313	0.0686	0.50436	0.05695	0.03996
d__Bacteria|p__Actinobacteriota|c__Actinobacteriota|o__Actinomycetales	0	0	0	0	0	0	0	0	0	0	0	0
d__Bacteria|p__Actinobacteriota|c__Actinobacteriota|o__Actinomycetales|f__Actinomycetaceae	0	0	0	0	0	0	0	0	0	0	0	0
d__Bacteria|p__Actinobacteriota|c__Actinobacteriota|o__Actinomycetales|f__Actinomycetaceae|g__Actinobaculum	0	0	0	0	0	0	0	0	0	0	0	0
d__Bacteria|p__Actinobacteriota|c__Actinobacteriota|o__Actinomycetales|f__Actinomycetaceae|g__Actinobaculum|s__uncultured_Actinobaculum_sp.	0	0	0	0	0	0	0	0	0	0	0	0
d__Bacteria|p__Actinobacteriota|c__Actinobacteriota|o__Corynebacteriales	0.00434	0.04446	0.17273	0.03142	0.05774	0.0862	0.07317	0.16313	0.0686	0.50436	0.05695	0.03996
d__Bacteria|p__Actinobacteriota|c__Actinobacteriota|o__Corynebacteriales|f__Corynebacteriaceae	0.00434	0.04446	0.17273	0.03142	0.05774	0.0862	0.07317	0.16313	0.0686	0.50436	0.05695	0.03996
d__Bacteria|p__Actinobacteriota|c__Actinobacteriota|o__Corynebacteriales|f__Corynebacteriaceae|g__Corynebacterium	0.00434	0.04446	0.17273	0.03142	0.05774	0.0862	0.07317	0.16313	0.0686	0.50436	0.05695	0.03996
d__Bacteria|p__Actinobacteriota|c__Actinobacteriota|o__Corynebacteriales|f__Corynebacteriaceae|g__Corynebacterium|s__Corynebacterium_lowii	0	0	0	0	0	0	0	0.02476	0	0	0	0
d__Bacteria|p__Actinobacteriota|c__Actinobacteriota|o__Corynebacteriales|f__Corynebacteriaceae|g__Corynebacterium|s__Corynebacterium_mastitidis	0.00434	0.04446	0.17273	0.03142	0.05774	0.0862	0.07012	0.13837	0.0686	0.50436	0.05695	0.03996
d__Bacteria|p__Actinobacteriota|c__Actinobacteriota|o__Corynebacteriales|f__Corynebacteriaceae|g__Corynebacterium|s__Corynebacterium_sp._Marseille-P4122	0	0	0	0	0	0	0.00305	0	0	0	0	0
d__Bacteria|p__Actinobacteriota|c__Actinobacteriota|o__Frankiales	0	0	0	0	0	0	0	0	0	0	0	0
d__Bacteria|p__Actinobacteriota|c__Actinobacteriota|o__Frankiales|f__Frankiales_unclassified	0	0	0	0	0	0	0	0	0	0	0	0
d__Bacteria|p__Actinobacteriota|c__Actinobacteriota|o__Frankiales|f__Frankiales_unclassified|g__Frankiales_unclassified	0	0	0	0	0	0	0	0	0	0	0	0
d__Bacteria|p__Actinobacteriota|c__Actinobacteriota|o__Frankiales|f__Frankiales_unclassified|g__Frankiales_unclassified|s__Frankiales_unclassified	0	0	0	0	0	0	0	0	0	0	0	0
d__Bacteria|p__Actinobacteriota|c__Actinobacteriota|o__Micrococcales	0	0	0	0	0	0	0	0	0	0	0	0
d__Bacteria|p__Actinobacteriota|c__Actinobacteriota|o__Micrococcales|f__Microbacteriaceae	0	0	0	0	0	0	0	0	0	0	0	0
d__Bacteria|p__Actinobacteriota|c__Actinobacteriota|o__Micrococcales|f__Microbacteriaceae|g__Curtobacterium	0	0	0	0	0	0	0	0	0	0	0	0
d__Bacteria|p__Actinobacteriota|c__Actinobacteriota|o__Micrococcales|f__Microbacteriaceae|g__Curtobacterium|s__Curtobacterium_flaccumfaciens	0	0	0	0	0	0	0	0	0	0	0	0
d__Bacteria|p__Actinobacteriota|c__Actinobacteriota|o__Micromonosporales	0.00579	0	0	0	0	0	0	0	0	0	0	0
d__Bacteria|p__Actinobacteriota|c__Actinobacteriota|o__Micromonosporales|f__Micromonosporaceae	0.00579	0	0	0	0	0	0	0	0	0	0	0
d__Bacteria|p__Actinobacteriota|c__Actinobacteriota|o__Micromonosporales|f__Micromonosporaceae|g__Actinoplanes	0.00579	0	0	0	0	0	0	0	0	0	0	0
d__Bacteria|p__Actinobacteriota|c__Actinobacteriota|o__Micromonosporales|f__Micromonosporaceae|g__Actinoplanes|s__Actinoplanes_sp._19	0.00579	0	0	0	0	0	0	0	0	0	0	0
d__Bacteria|p__Actinobacteriota|c__Coriobacteriia	0.57033	0.38787	1.94796	0.52222	0.20642	0.3463	0.40394	0.38307	0.32471	1.28977	0.9589	0.26591
d__Bacteria|p__Actinobacteriota|c__Coriobacteriia|o__Coriobacteriales	0.42992	0.35261	1.83144	0.47284	0.17899	0.2964	0.37498	0.335	0.30337	1.18359	0.89118	0.22748
d__Bacteria|p__Actinobacteriota|c__Coriobacteriia|o__Coriobacteriales|f__Atopobiaceae	0.00579	0.01073	0.00274	0.00748	0	0.00454	0.04421	0.00728	0	0.00312	0	0
d__Bacteria|p__Actinobacteriota|c__Coriobacteriia|o__Coriobacteriales|f__Atopobiaceae|g__Atopobium	0	0	0	0.00299	0	0	0	0	0	0	0	0
d__Bacteria|p__Actinobacteriota|c__Coriobacteriia|o__Coriobacteriales|f__Atopobiaceae|g__Atopobium|s__Atopobium_unclassified	0	0	0	0.00299	0	0	0	0	0	0	0	0
d__Bacteria|p__Actinobacteriota|c__Coriobacteriia|o__Coriobacteriales|f__Atopobiaceae|g__Coriobacteriaceae_UCG-002	0.00579	0.01073	0.00274	0.00449	0	0.00454	0.0061	0.00437	0	0.00312	0	0
d__Bacteria|p__Actinobacteriota|c__Coriobacteriia|o__Coriobacteriales|f__Atopobiaceae|g__Coriobacteriaceae_UCG-002|s__Coriobacteriaceae_UCG-002_unclassified	0.00579	0.01073	0.00274	0.00449	0	0.00454	0.0061	0.00437	0	0.00312	0	0
d__Bacteria|p__Actinobacteriota|c__Coriobacteriia|o__Coriobacteriales|f__Atopobiaceae|g__Olsenella	0	0	0	0	0	0	0.03811	0.00291	0	0	0	0
d__Bacteria|p__Actinobacteriota|c__Coriobacteriia|o__Coriobacteriales|f__Atopobiaceae|g__Olsenella|s__Olsenella_scatoligenes	0	0	0	0	0	0	0.03811	0	0	0	0	0
d__Bacteria|p__Actinobacteriota|c__Coriobacteriia|o__Coriobacteriales|f__Atopobiaceae|g__Olsenella|s__Olsenella_sp._1183	0	0	0	0	0	0	0	0.00291	0	0	0	0
d__Bacteria|p__Actinobacteriota|c__Coriobacteriia|o__Coriobacteriales|f__Atopobiaceae|g__Olsenella|s__Olsenella_sp._N13-17	0	0	0	0	0	0	0	0	0	0	0	0
d__Bacteria|p__Actinobacteriota|c__Coriobacteriia|o__Coriobacteriales|f__Coriobacteriaceae	0.0029	0.0046	0	0	0	0	0.02286	0	0.02134	0	0	0.00461
d__Bacteria|p__Actinobacteriota|c__Coriobacteriia|o__Coriobacteriales|f__Coriobacteriaceae|g__Collinsella	0.0029	0.0046	0	0	0	0	0.02286	0	0.02134	0	0	0.00461
d__Bacteria|p__Actinobacteriota|c__Coriobacteriia|o__Coriobacteriales|f__Coriobacteriaceae|g__Collinsella|s__Collinsella_aerofaciens	0	0	0	0	0	0	0.02286	0	0	0	0	0
d__Bacteria|p__Actinobacteriota|c__Coriobacteriia|o__Coriobacteriales|f__Coriobacteriaceae|g__Collinsella|s__Collinsella_unclassified	0.0029	0.0046	0	0	0	0	0	0	0.02134	0	0	0.00461
d__Bacteria|p__Actinobacteriota|c__Coriobacteriia|o__Coriobacteriales|f__Coriobacteriaceae|g__Collinsella|s__Collinsella_vaginalis	0	0	0	0	0	0	0	0	0	0	0	0
d__Bacteria|p__Actinobacteriota|c__Coriobacteriia|o__Coriobacteriales|f__Eggerthellaceae	0.42123	0.33728	1.8287	0.46536	0.17899	0.29186	0.30791	0.32772	0.28203	1.18047	0.89118	0.22287
d__Bacteria|p__Actinobacteriota|c__Coriobacteriia|o__Coriobacteriales|f__Eggerthellaceae|g__Eggerthella	0	0	0	0	0	0	0	0.00291	0	0	0	0
d__Bacteria|p__Actinobacteriota|c__Coriobacteriia|o__Coriobacteriales|f__Eggerthellaceae|g__Eggerthella|s__Eggerthella_unclassified	0	0	0	0	0	0	0	0.00291	0	0	0	0
d__Bacteria|p__Actinobacteriota|c__Coriobacteriia|o__Coriobacteriales|f__Eggerthellaceae|g__Enterorhabdus	0.39518	0.31122	1.74371	0.46536	0.17899	0.29186	0.30181	0.32481	0.28203	1.13675	0.88502	0.22287
d__Bacteria|p__Actinobacteriota|c__Coriobacteriia|o__Coriobacteriales|f__Eggerthellaceae|g__Enterorhabdus|s__Enterorhabdus_unclassified	0.39518	0.31122	1.74371	0.46536	0.17899	0.29186	0.30181	0.32481	0.28203	1.13675	0.88502	0.22287
d__Bacteria|p__Actinobacteriota|c__Coriobacteriia|o__Coriobacteriales|f__Eggerthellaceae|g__Gordonibacter	0.00434	0	0.01782	0	0	0	0	0	0	0	0	0
d__Bacteria|p__Actinobacteriota|c__Coriobacteriia|o__Coriobacteriales|f__Eggerthellaceae|g__Gordonibacter|s__Gordonibacter_unclassified	0.00434	0	0.01782	0	0	0	0	0	0	0	0	0
d__Bacteria|p__Actinobacteriota|c__Coriobacteriia|o__Coriobacteriales|f__Eggerthellaceae|g__Parvibacter	0.02171	0.02606	0.06717	0	0	0	0.0061	0	0	0.04372	0.00616	0
d__Bacteria|p__Actinobacteriota|c__Coriobacteriia|o__Coriobacteriales|f__Eggerthellaceae|g__Parvibacter|s__Parvibacter_unclassified	0.02171	0.02606	0.06717	0	0	0	0.0061	0	0	0.04372	0.00616	0
d__Bacteria|p__Actinobacteriota|c__Coriobacteriia|o__Eggerthellales	0.14041	0.03526	0.11652	0.04938	0.02743	0.0499	0.02896	0.04807	0.02134	0.10618	0.06772	0.03843
d__Bacteria|p__Actinobacteriota|c__Coriobacteriia|o__Eggerthellales|f__Eggerthellaceae	0.14041	0.03526	0.11652	0.04938	0.02743	0.0499	0.02896	0.04807	0.02134	0.10618	0.06772	0.03843
d__Bacteria|p__Actinobacteriota|c__Coriobacteriia|o__Eggerthellales|f__Eggerthellaceae|g__Enterorhabdus	0.14041	0.03526	0.11652	0.04938	0.02743	0.0499	0.02896	0.04807	0.02134	0.10618	0.06772	0.03843
d__Bacteria|p__Actinobacteriota|c__Coriobacteriia|o__Eggerthellales|f__Eggerthellaceae|g__Enterorhabdus|s__Enterorhabdus_muris	0.04053	0	0.01234	0	0	0	0.01372	0.01748	0	0.07807	0.02001	0.01537
d__Bacteria|p__Actinobacteriota|c__Coriobacteriia|o__Eggerthellales|f__Eggerthellaceae|g__Enterorhabdus|s__Enterorhabdus_sp.	0.09988	0.03526	0.10418	0.04938	0.02743	0.0499	0.01524	0.03059	0.02134	0.02811	0.04771	0.02306
d__Bacteria|p__Bacteroidota	17.4689	43.9949	3.55186	23.7214	23.7196	5.55145	11.3375	26.1652	57.1795	12.4996	12.8398	60.225
d__Bacteria|p__Bacteroidota|c__Bacteroidia	17.4616	43.9949	3.55186	23.6974	23.7196	5.54086	11.3193	26.139	57.1795	12.4996	12.8398	60.2112
d__Bacteria|p__Bacteroidota|c__Bacteroidia|o__Bacteroidales	17.4587	43.9413	3.52993	23.6121	23.6258	5.48339	11.2308	26.1128	57.1596	12.4575	12.8198	60.139
d__Bacteria|p__Bacteroidota|c__Bacteroidia|o__Bacteroidales|f__Bacteroidaceae	1.24199	6.35004	1.37359	3.63012	4.32041	0.34479	1.11576	7.03507	15.426	0.584	1.54226	19.4049
d__Bacteria|p__Bacteroidota|c__Bacteroidia|o__Bacteroidales|f__Bacteroidaceae|g__Anaerorhabdus	0	0.00767	0	0.00299	0.00289	0	0	0	0.00457	0	0	0.00307
d__Bacteria|p__Bacteroidota|c__Bacteroidia|o__Bacteroidales|f__Bacteroidaceae|g__Anaerorhabdus|s__uncultured_Anaerorhabdus_sp.	0	0.00767	0	0.00299	0.00289	0	0	0	0.00457	0	0	0.00307
d__Bacteria|p__Bacteroidota|c__Bacteroidia|o__Bacteroidales|f__Bacteroidaceae|g__Bacteroidaceae_unclassified	0	0	0	0.00449	0	0	0	0	0	0	0	0
d__Bacteria|p__Bacteroidota|c__Bacteroidia|o__Bacteroidales|f__Bacteroidaceae|g__Bacteroidaceae_unclassified|s__Bacteroidaceae_unclassified	0	0	0	0.00449	0	0	0	0	0	0	0	0
d__Bacteria|p__Bacteroidota|c__Bacteroidia|o__Bacteroidales|f__Bacteroidaceae|g__Bacteroides	1.24199	6.34237	1.37359	3.62264	4.31752	0.34479	1.11576	7.03507	15.4214	0.584	1.54226	19.4018
d__Bacteria|p__Bacteroidota|c__Bacteroidia|o__Bacteroidales|f__Bacteroidaceae|g__Bacteroides|s__Bacteroides_acidifaciens	0.9105	4.79089	0.93903	2.82209	3.30995	0.21928	0.73927	5.44599	12.2765	0.27794	1.1236	15.2027
d__Bacteria|p__Bacteroidota|c__Bacteroidia|o__Bacteroidales|f__Bacteroidaceae|g__Bacteroides|s__Bacteroides_barnesiae	0	0.03526	0	0	0	0	0.02896	0	0.00305	0.02655	0	0.01691
d__Bacteria|p__Bacteroidota|c__Bacteroidia|o__Bacteroidales|f__Bacteroidaceae|g__Bacteroides|s__Bacteroides_caecigallinarum	0.0029	0	0.01097	0.01646	0.01444	0	0.01829	0.01457	0	0	0.01231	0
d__Bacteria|p__Bacteroidota|c__Bacteroidia|o__Bacteroidales|f__Bacteroidaceae|g__Bacteroides|s__Bacteroides_caecimuris	0	0	0	0	0	0	0	0	0.00457	0	0	0
d__Bacteria|p__Bacteroidota|c__Bacteroidia|o__Bacteroidales|f__Bacteroidaceae|g__Bacteroides|s__Bacteroides_coprophilus	0	0	0	0	0	0	0	0	0	0.00937	0	0
d__Bacteria|p__Bacteroidota|c__Bacteroidia|o__Bacteroidales|f__Bacteroidaceae|g__Bacteroides|s__Bacteroides_finegoldii	0	0.14258	0.07814	0.03292	0.11981	0.09073	0.06402	0.01165	0.04726	0.13585	0.08312	0.03228
d__Bacteria|p__Bacteroidota|c__Bacteroidia|o__Bacteroidales|f__Bacteroidaceae|g__Bacteroides|s__Bacteroides_fragilis	0	0	0	0	0	0	0	0	0	0	0	0.00769
d__Bacteria|p__Bacteroidota|c__Bacteroidia|o__Bacteroidales|f__Bacteroidaceae|g__Bacteroides|s__Bacteroides_mediterraneensis	0	0	0	0	0	0	0	0.02039	0	0	0	0.0123
d__Bacteria|p__Bacteroidota|c__Bacteroidia|o__Bacteroidales|f__Bacteroidaceae|g__Bacteroides|s__Bacteroides_ndongoniae	0	0	0	0	0	0	0	0	0.0122	0	0	0
d__Bacteria|p__Bacteroidota|c__Bacteroidia|o__Bacteroidales|f__Bacteroidaceae|g__Bacteroides|s__Bacteroides_rodentium	0	0	0	0	0.00289	0	0	0	0	0	0	0
d__Bacteria|p__Bacteroidota|c__Bacteroidia|o__Bacteroidales|f__Bacteroidaceae|g__Bacteroides|s__Bacteroides_sp.	0	0	0	0	0.00289	0	0	0	0	0	0	0.14141
d__Bacteria|p__Bacteroidota|c__Bacteroidia|o__Bacteroidales|f__Bacteroidaceae|g__Bacteroides|s__Bacteroides_sp._SB5	0.01303	0	0.02879	0.02544	0.02598	0.01361	0.02591	0.02913	0.01829	0	0.02001	0
d__Bacteria|p__Bacteroidota|c__Bacteroidia|o__Bacteroidales|f__Bacteroidaceae|g__Bacteroides|s__Bacteroides_sp._Tilapia9	0	0	0	0	0	0	0	0	0	0	0	0
d__Bacteria|p__Bacteroidota|c__Bacteroidia|o__Bacteroidales|f__Bacteroidaceae|g__Bacteroides|s__Bacteroides_sp._baku-33	0	0	0.01508	0	0.03753	0	0.01067	0	0	0	0	0
d__Bacteria|p__Bacteroidota|c__Bacteroidia|o__Bacteroidales|f__Bacteroidaceae|g__Bacteroides|s__Bacteroides_unclassified	0.30977	1.30925	0.27828	0.65839	0.78238	0.02117	0.19511	1.51334	2.96355	0.08432	0.28475	3.85945
d__Bacteria|p__Bacteroidota|c__Bacteroidia|o__Bacteroidales|f__Bacteroidaceae|g__Bacteroides|s__Bacteroides_uniformis	0	0	0	0.04489	0	0	0	0	0	0	0	0.04457
d__Bacteria|p__Bacteroidota|c__Bacteroidia|o__Bacteroidales|f__Bacteroidaceae|g__Bacteroides|s__uncultured_Bacteroides_sp.	0.00579	0.06439	0.0233	0.02245	0.02165	0	0.03353	0	0.09604	0.04997	0.01847	0.08454
d__Bacteria|p__Bacteroidota|c__Bacteroidia|o__Bacteroidales|f__Bacteroidales_RF16_group	0	0	0	0	0	0	0	0	0	0	0	0
d__Bacteria|p__Bacteroidota|c__Bacteroidia|o__Bacteroidales|f__Bacteroidales_RF16_group|g__Bacteroidales_RF16_group_unclassified	0	0	0	0	0	0	0	0	0	0	0	0
d__Bacteria|p__Bacteroidota|c__Bacteroidia|o__Bacteroidales|f__Bacteroidales_RF16_group|g__Bacteroidales_RF16_group_unclassified|s__Bacteroidales_RF16_group_unclassified	0	0	0	0	0	0	0	0	0	0	0	0
d__Bacteria|p__Bacteroidota|c__Bacteroidia|o__Bacteroidales|f__Bacteroidales_unclassified	0	0	0.02468	0.01646	0.00866	0	0.01067	0.02476	0.12348	0	0.01385	0.02613
d__Bacteria|p__Bacteroidota|c__Bacteroidia|o__Bacteroidales|f__Bacteroidales_unclassified|g__Bacteroidales_unclassified	0	0	0.02468	0.01646	0.00866	0	0.01067	0.02476	0.12348	0	0.01385	0.02613
d__Bacteria|p__Bacteroidota|c__Bacteroidia|o__Bacteroidales|f__Bacteroidales_unclassified|g__Bacteroidales_unclassified|s__Bacteroidales_unclassified	0	0	0.02468	0.01646	0.00866	0	0.01067	0.02476	0.12348	0	0.01385	0.02613
d__Bacteria|p__Bacteroidota|c__Bacteroidia|o__Bacteroidales|f__Barnesiellaceae	0	0.023	0	0.00748	0	0	0.01677	0.01602	0.00457	0	0.00308	0
d__Bacteria|p__Bacteroidota|c__Bacteroidia|o__Bacteroidales|f__Barnesiellaceae|g__Barnesiella	0	0.023	0	0.00748	0	0	0.01677	0.01602	0.00457	0	0.00308	0
d__Bacteria|p__Bacteroidota|c__Bacteroidia|o__Bacteroidales|f__Barnesiellaceae|g__Barnesiella|s__Barnesiella_viscericola	0	0	0	0	0	0	0	0	0	0	0	0
d__Bacteria|p__Bacteroidota|c__Bacteroidia|o__Bacteroidales|f__Barnesiellaceae|g__Barnesiella|s__uncultured_Barnesiella_sp.	0	0.023	0	0.00748	0	0	0.01677	0.01602	0.00457	0	0.00308	0
d__Bacteria|p__Bacteroidota|c__Bacteroidia|o__Bacteroidales|f__Marinifilaceae	0.00869	0.16251	0.03153	1.19407	0.11548	0.03629	0.15852	0.21411	0.32471	1.74417	0.1924	0.05533
d__Bacteria|p__Bacteroidota|c__Bacteroidia|o__Bacteroidales|f__Marinifilaceae|g__Odoribacter	0.00869	0.16251	0.03153	1.19407	0.11548	0.03629	0.15852	0.21411	0.32471	1.74417	0.1924	0.05533
d__Bacteria|p__Bacteroidota|c__Bacteroidia|o__Bacteroidales|f__Marinifilaceae|g__Odoribacter|s__Odoribacter_unclassified	0.00869	0.16251	0.03153	1.19407	0.11548	0.03629	0.15852	0.21411	0.32471	1.74417	0.1924	0.05533
d__Bacteria|p__Bacteroidota|c__Bacteroidia|o__Bacteroidales|f__Muribaculaceae	13.892	35.1475	1.69848	13.1408	12.7158	3.50538	7.42169	12.4097	31.3795	5.46985	8.34848	38.3532
d__Bacteria|p__Bacteroidota|c__Bacteroidia|o__Bacteroidales|f__Muribaculaceae|g__Duncaniella	0.53993	1.05936	0.02742	0.07332	0.06207	0	0.1006	0.0568	0.67838	0.0203	0.06465	0.86073
d__Bacteria|p__Bacteroidota|c__Bacteroidia|o__Bacteroidales|f__Muribaculaceae|g__Duncaniella|s__Duncaniella_muris	0.53993	1.05936	0.02742	0.07332	0.06207	0	0.1006	0.0568	0.67838	0.0203	0.06465	0.86073
d__Bacteria|p__Bacteroidota|c__Bacteroidia|o__Bacteroidales|f__Muribaculaceae|g__Muribaculaceae_unclassified	10.8565	23.5252	1.38318	11.8031	11.1034	3.20142	6.44768	11.3056	26.3762	4.4502	7.49577	31.6134
d__Bacteria|p__Bacteroidota|c__Bacteroidia|o__Bacteroidales|f__Muribaculaceae|g__Muribaculaceae_unclassified|s__Muribaculaceae_unclassified	10.8565	23.5252	1.38318	11.8031	11.1034	3.20142	6.44768	11.3056	26.3762	4.4502	7.49577	31.6134
d__Bacteria|p__Bacteroidota|c__Bacteroidia|o__Bacteroidales|f__Muribaculaceae|g__Muribaculum	2.49555	10.3636	0.28788	1.2644	1.49836	0.30396	0.87341	0.86372	4.28526	0.78855	0.78806	5.8791
d__Bacteria|p__Bacteroidota|c__Bacteroidia|o__Bacteroidales|f__Muribaculaceae|g__Muribaculum|s__Muribaculum_intestinale	0.02316	0.20237	0.0096	0.17208	0.36232	0.08317	0.03201	0.17478	0.07927	0.26077	0.05849	0.01691
d__Bacteria|p__Bacteroidota|c__Bacteroidia|o__Bacteroidales|f__Muribaculaceae|g__Muribaculum|s__Muribaculum_sp.	2.47239	10.1613	0.27828	1.09232	1.13604	0.22079	0.8414	0.68894	4.20599	0.52778	0.72957	5.86219
d__Bacteria|p__Bacteroidota|c__Bacteroidia|o__Bacteroidales|f__Muribaculaceae|g__Paramuribaculum	0	0.1993	0	0	0.05197	0	0	0.18352	0.03964	0.2108	0	0
d__Bacteria|p__Bacteroidota|c__Bacteroidia|o__Bacteroidales|f__Muribaculaceae|g__Paramuribaculum|s__Paramuribaculum_intestinale	0	0.1993	0	0	0.05197	0	0	0.18352	0.03964	0.2108	0	0
d__Bacteria|p__Bacteroidota|c__Bacteroidia|o__Bacteroidales|f__Paludibacteraceae	0	0	0	0	0	0	0	0	0	0	0	0
d__Bacteria|p__Bacteroidota|c__Bacteroidia|o__Bacteroidales|f__Paludibacteraceae|g__Paludibacter	0	0	0	0	0	0	0	0	0	0	0	0
d__Bacteria|p__Bacteroidota|c__Bacteroidia|o__Bacteroidales|f__Paludibacteraceae|g__Paludibacter|s__uncultured_Paludibacter_sp.	0	0	0	0	0	0	0	0	0	0	0	0
d__Bacteria|p__Bacteroidota|c__Bacteroidia|o__Bacteroidales|f__Porphyromonadaceae	0	0.03679	0.0329	0.0838	0.05052	0.03478	0.04573	0.0335	0.05793	0.03904	0.02924	0.07992
d__Bacteria|p__Bacteroidota|c__Bacteroidia|o__Bacteroidales|f__Porphyromonadaceae|g__Porphyromonadaceae_unclassified	0	0	0	0.00449	0	0	0	0	0	0	0	0.00461
d__Bacteria|p__Bacteroidota|c__Bacteroidia|o__Bacteroidales|f__Porphyromonadaceae|g__Porphyromonadaceae_unclassified|s__Porphyromonadaceae_unclassified	0	0	0	0.00449	0	0	0	0	0	0	0	0.00461
d__Bacteria|p__Bacteroidota|c__Bacteroidia|o__Bacteroidales|f__Porphyromonadaceae|g__Porphyromonas	0	0.03679	0.0329	0.07931	0.05052	0.03478	0.04573	0.0335	0.05793	0.03904	0.02924	0.07531
d__Bacteria|p__Bacteroidota|c__Bacteroidia|o__Bacteroidales|f__Porphyromonadaceae|g__Porphyromonas|s__Porphyromonas_sp._canine_oral_taxon_281	0	0.03679	0.0329	0.07931	0.05052	0.03478	0.04573	0.0335	0.05793	0.03904	0.02924	0.07531
d__Bacteria|p__Bacteroidota|c__Bacteroidia|o__Bacteroidales|f__Prevotellaceae	1.47793	0.0276	0.06991	0.34715	3.73434	0.55953	0.33229	0.10195	6.64665	0.089	0.09389	0.05687
d__Bacteria|p__Bacteroidota|c__Bacteroidia|o__Bacteroidales|f__Prevotellaceae|g__Alloprevotella	1.45332	0.0276	0.04935	0.33368	3.68526	0.53533	0.28504	0.04078	6.52774	0.05465	0.08158	0.04918
d__Bacteria|p__Bacteroidota|c__Bacteroidia|o__Bacteroidales|f__Prevotellaceae|g__Alloprevotella|s__Alloprevotella_unclassified	1.45332	0.0276	0.04935	0.33368	3.68526	0.53533	0.28504	0.04078	6.52774	0.05465	0.08158	0.04918
d__Bacteria|p__Bacteroidota|c__Bacteroidia|o__Bacteroidales|f__Prevotellaceae|g__Paraprevotella	0	0	0	0	0	0	0	0	0	0	0	0
d__Bacteria|p__Bacteroidota|c__Bacteroidia|o__Bacteroidales|f__Prevotellaceae|g__Paraprevotella|s__Paraprevotella_unclassified	0	0	0	0	0	0	0	0	0	0	0	0
d__Bacteria|p__Bacteroidota|c__Bacteroidia|o__Bacteroidales|f__Prevotellaceae|g__Prevotella	0	0	0	0.00599	0	0	0	0.00291	0.03049	0	0	0
d__Bacteria|p__Bacteroidota|c__Bacteroidia|o__Bacteroidales|f__Prevotellaceae|g__Prevotella_7	0	0	0.00548	0	0	0	0	0	0.00457	0	0	0
d__Bacteria|p__Bacteroidota|c__Bacteroidia|o__Bacteroidales|f__Prevotellaceae|g__Prevotella_7|s__Prevotella_7_unclassified	0	0	0.00548	0	0	0	0	0	0.00457	0	0	0
d__Bacteria|p__Bacteroidota|c__Bacteroidia|o__Bacteroidales|f__Prevotellaceae|g__Prevotella_9	0.01448	0	0	0	0.00722	0	0.01524	0.01893	0	0	0	0
d__Bacteria|p__Bacteroidota|c__Bacteroidia|o__Bacteroidales|f__Prevotellaceae|g__Prevotella_9|s__Prevotella_9_unclassified	0.01448	0	0	0	0.00722	0	0.01524	0.01893	0	0	0	0
d__Bacteria|p__Bacteroidota|c__Bacteroidia|o__Bacteroidales|f__Prevotellaceae|g__Prevotellaceae_Ga6A1_group	0	0	0.01508	0	0	0.01361	0.02744	0.0102	0.01982	0.01874	0	0
d__Bacteria|p__Bacteroidota|c__Bacteroidia|o__Bacteroidales|f__Prevotellaceae|g__Prevotellaceae_Ga6A1_group|s__Prevotellaceae_Ga6A1_group_unclassified	0	0	0.01508	0	0	0.01361	0.02744	0.0102	0.01982	0.01874	0	0
d__Bacteria|p__Bacteroidota|c__Bacteroidia|o__Bacteroidales|f__Prevotellaceae|g__Prevotellaceae_NK3B31_group	0	0	0	0.00449	0.00866	0	0.00457	0.00291	0	0	0	0
d__Bacteria|p__Bacteroidota|c__Bacteroidia|o__Bacteroidales|f__Prevotellaceae|g__Prevotellaceae_NK3B31_group|s__Prevotellaceae_NK3B31_group_unclassified	0	0	0	0.00449	0.00866	0	0.00457	0.00291	0	0	0	0
d__Bacteria|p__Bacteroidota|c__Bacteroidia|o__Bacteroidales|f__Prevotellaceae|g__Prevotellaceae_UCG-001	0.00579	0	0	0.00299	0.00722	0.01059	0	0.01602	0.01067	0.01561	0.01231	0.00769
d__Bacteria|p__Bacteroidota|c__Bacteroidia|o__Bacteroidales|f__Prevotellaceae|g__Prevotellaceae_UCG-001|s__Prevotellaceae_UCG-001_unclassified	0.00579	0	0	0.00299	0.00722	0.01059	0	0.01602	0.01067	0.01561	0.01231	0.00769
d__Bacteria|p__Bacteroidota|c__Bacteroidia|o__Bacteroidales|f__Prevotellaceae|g__Prevotellaceae_UCG-003	0	0	0	0	0	0	0	0.0102	0	0	0	0
d__Bacteria|p__Bacteroidota|c__Bacteroidia|o__Bacteroidales|f__Prevotellaceae|g__Prevotellaceae_UCG-003|s__Prevotellaceae_UCG-003_unclassified	0	0	0	0	0	0	0	0.0102	0	0	0	0
d__Bacteria|p__Bacteroidota|c__Bacteroidia|o__Bacteroidales|f__Prevotellaceae|g__Prevotellaceae_unclassified	0.00434	0	0	0	0.02598	0	0	0	0.05336	0	0	0
d__Bacteria|p__Bacteroidota|c__Bacteroidia|o__Bacteroidales|f__Prevotellaceae|g__Prevotellaceae_unclassified|s__Prevotellaceae_unclassified	0.00434	0	0	0	0.02598	0	0	0	0.05336	0	0	0
d__Bacteria|p__Bacteroidota|c__Bacteroidia|o__Bacteroidales|f__Prevotellaceae|g__Prevotella|s__uncultured_Prevotella_sp.	0	0	0	0.00599	0	0	0	0.00291	0.03049	0	0	0
d__Bacteria|p__Bacteroidota|c__Bacteroidia|o__Bacteroidales|f__Rikenellaceae	0.6239	1.98074	0.16039	4.21218	1.48681	0.46275	1.32307	4.04771	1.72568	4.23316	2.15793	1.20195
d__Bacteria|p__Bacteroidota|c__Bacteroidia|o__Bacteroidales|f__Rikenellaceae|g__Alistipes	0.11581	0.64083	0.07677	1.15068	0.7997	0.29942	0.31705	0.69913	0.44514	0.83695	0.26782	0.35044
d__Bacteria|p__Bacteroidota|c__Bacteroidia|o__Bacteroidales|f__Rikenellaceae|g__Alistipes|s__Alistipes_inops	0	0.04139	0.01508	0.12719	0.00577	0	0.07164	0.21702	0.06708	0.00468	0.05695	0.06609
d__Bacteria|p__Bacteroidota|c__Bacteroidia|o__Bacteroidales|f__Rikenellaceae|g__Alistipes|s__Alistipes_massiliensis	0	0	0	0.00748	0	0	0	0	0	0	0	0
d__Bacteria|p__Bacteroidota|c__Bacteroidia|o__Bacteroidales|f__Rikenellaceae|g__Alistipes|s__Alistipes_sp.	0	0	0	0	0.00577	0	0	0	0	0	0	0
d__Bacteria|p__Bacteroidota|c__Bacteroidia|o__Bacteroidales|f__Rikenellaceae|g__Alistipes|s__Alistipes_sp._Marseille-P5061	0	0	0	0	0	0	0.00305	0	0	0	0	0
d__Bacteria|p__Bacteroidota|c__Bacteroidia|o__Bacteroidales|f__Rikenellaceae|g__Alistipes|s__Alistipes_sp._Marseille-P5997	0	0	0	0	0	0	0	0	0	0	0	0
d__Bacteria|p__Bacteroidota|c__Bacteroidia|o__Bacteroidales|f__Rikenellaceae|g__Alistipes|s__Alistipes_unclassified	0.08396	0.46146	0.0425	0.76762	0.71165	0.25859	0.14023	0.3685	0.18598	0.76044	0.13391	0.11681
d__Bacteria|p__Bacteroidota|c__Bacteroidia|o__Bacteroidales|f__Rikenellaceae|g__Alistipes|s__uncultured_Alistipes_sp.	0.03185	0.13798	0.01919	0.24839	0.07651	0.04083	0.10213	0.11361	0.19208	0.07183	0.07696	0.16754
d__Bacteria|p__Bacteroidota|c__Bacteroidia|o__Bacteroidales|f__Rikenellaceae|g__Rikenella	0.21424	0.45839	0.01371	1.56517	0.25839	0.13157	0.38107	2.26055	0.35977	3.35249	0.58027	0.82999
d__Bacteria|p__Bacteroidota|c__Bacteroidia|o__Bacteroidales|f__Rikenellaceae|g__Rikenellaceae_RC9_gut_group	0.29385	0.88152	0.06991	1.49633	0.42872	0.03176	0.62495	1.08803	0.9162	0.04372	1.30984	0.02152
d__Bacteria|p__Bacteroidota|c__Bacteroidia|o__Bacteroidales|f__Rikenellaceae|g__Rikenellaceae_RC9_gut_group|s__Rikenellaceae_RC9_gut_group_unclassified	0.29385	0.88152	0.06991	1.49633	0.42872	0.03176	0.62495	1.08803	0.9162	0.04372	1.30984	0.02152
d__Bacteria|p__Bacteroidota|c__Bacteroidia|o__Bacteroidales|f__Rikenellaceae|g__Rikenella|s__Rikenella_unclassified	0.21424	0.45839	0.01371	1.56517	0.25839	0.13157	0.38107	2.26055	0.35977	3.35249	0.58027	0.82999
d__Bacteria|p__Bacteroidota|c__Bacteroidia|o__Bacteroidales|f__Rikenellaceae|g__Tidjanibacter	0	0	0	0	0	0	0	0	0.00457	0	0	0
d__Bacteria|p__Bacteroidota|c__Bacteroidia|o__Bacteroidales|f__Rikenellaceae|g__Tidjanibacter|s__Tidjanibacter_massiliensis	0	0	0	0	0	0	0	0	0.00457	0	0	0
d__Bacteria|p__Bacteroidota|c__Bacteroidia|o__Bacteroidales|f__Rikenellaceae|g__dgA-11_gut_group	0	0	0	0	0	0	0	0	0	0	0	0
d__Bacteria|p__Bacteroidota|c__Bacteroidia|o__Bacteroidales|f__Rikenellaceae|g__dgA-11_gut_group|s__dgA-11_gut_group_unclassified	0	0	0	0	0	0	0	0	0	0	0	0
d__Bacteria|p__Bacteroidota|c__Bacteroidia|o__Bacteroidales|f__Tannerellaceae	0.21424	0.2131	0.13845	0.98009	1.19378	0.53987	0.80634	2.22996	1.47111	0.29824	0.43866	0.96064
d__Bacteria|p__Bacteroidota|c__Bacteroidia|o__Bacteroidales|f__Tannerellaceae|g__Parabacteroides	0.19542	0.09505	0.12885	0.90378	1.00468	0.52475	0.69202	1.60219	0.83541	0.07651	0.42789	0.22902
d__Bacteria|p__Bacteroidota|c__Bacteroidia|o__Bacteroidales|f__Tannerellaceae|g__Parabacteroides|s__Parabacteroides_distasonis	0	0	0	0.00748	0	0	0	0	0	0	0	0.00922
d__Bacteria|p__Bacteroidota|c__Bacteroidia|o__Bacteroidales|f__Tannerellaceae|g__Parabacteroides|s__Parabacteroides_goldsteinii	0	0	0	0	0	0	0	0	0.00305	0	0	0
d__Bacteria|p__Bacteroidota|c__Bacteroidia|o__Bacteroidales|f__Tannerellaceae|g__Parabacteroides|s__Parabacteroides_merdae	0	0	0	0.00299	0	0	0	0	0	0	0	0
d__Bacteria|p__Bacteroidota|c__Bacteroidia|o__Bacteroidales|f__Tannerellaceae|g__Parabacteroides|s__Parabacteroides_sp.	0	0	0.00685	0	0.00722	0.00454	0	0.00583	0	0.00312	0.00308	0.00769
d__Bacteria|p__Bacteroidota|c__Bacteroidia|o__Bacteroidales|f__Tannerellaceae|g__Parabacteroides|s__Parabacteroides_unclassified	0.19542	0.04446	0.122	0.88882	0.99746	0.52021	0.68897	1.59636	0.66162	0.07339	0.42481	0.166
d__Bacteria|p__Bacteroidota|c__Bacteroidia|o__Bacteroidales|f__Tannerellaceae|g__Parabacteroides|s__uncultured_Parabacteroides_sp.	0	0.05059	0	0.00449	0	0	0.00305	0	0.17074	0	0	0.04611
d__Bacteria|p__Bacteroidota|c__Bacteroidia|o__Bacteroidales|f__Tannerellaceae|g__Tannerellaceae_unclassified	0.01882	0.11805	0.0096	0.07631	0.1891	0.01512	0.11432	0.62777	0.6357	0.22173	0.01077	0.73162
d__Bacteria|p__Bacteroidota|c__Bacteroidia|o__Bacteroidales|f__Tannerellaceae|g__Tannerellaceae_unclassified|s__Tannerellaceae_unclassified	0.01882	0.11805	0.0096	0.07631	0.1891	0.01512	0.11432	0.62777	0.6357	0.22173	0.01077	0.73162
d__Bacteria|p__Bacteroidota|c__Bacteroidia|o__Chitinophagales	0.0029	0	0	0	0	0	0	0	0	0	0	0.00307
d__Bacteria|p__Bacteroidota|c__Bacteroidia|o__Chitinophagales|f__Chitinophagaceae	0.0029	0	0	0	0	0	0	0	0	0	0	0.00307
d__Bacteria|p__Bacteroidota|c__Bacteroidia|o__Chitinophagales|f__Chitinophagaceae|g__Chitinophaga	0.0029	0	0	0	0	0	0	0	0	0	0	0
d__Bacteria|p__Bacteroidota|c__Bacteroidia|o__Chitinophagales|f__Chitinophagaceae|g__Chitinophaga|s__Chitinophaga_unclassified	0.0029	0	0	0	0	0	0	0	0	0	0	0
d__Bacteria|p__Bacteroidota|c__Bacteroidia|o__Chitinophagales|f__Chitinophagaceae|g__Ferruginibacter	0	0	0	0	0	0	0	0	0	0	0	0.00307
d__Bacteria|p__Bacteroidota|c__Bacteroidia|o__Chitinophagales|f__Chitinophagaceae|g__Ferruginibacter|s__Ferruginibacter_unclassified	0	0	0	0	0	0	0	0	0	0	0	0.00307
d__Bacteria|p__Bacteroidota|c__Bacteroidia|o__Flavobacteriales	0	0.05365	0.02193	0.08529	0.09383	0.05747	0.08841	0.02622	0.01982	0.04216	0.02001	0.06917
d__Bacteria|p__Bacteroidota|c__Bacteroidia|o__Flavobacteriales|f__Flavobacteriaceae	0	0	0	0	0.00722	0.00756	0.00915	0	0	0	0	0
d__Bacteria|p__Bacteroidota|c__Bacteroidia|o__Flavobacteriales|f__Flavobacteriaceae|g__Flavobacterium	0	0	0	0	0.00722	0	0.00915	0	0	0	0	0
d__Bacteria|p__Bacteroidota|c__Bacteroidia|o__Flavobacteriales|f__Flavobacteriaceae|g__Flavobacterium|s__Flavobacterium_unclassified	0	0	0	0	0.00722	0	0.00915	0	0	0	0	0
d__Bacteria|p__Bacteroidota|c__Bacteroidia|o__Flavobacteriales|f__Flavobacteriaceae|g__Myroides	0	0	0	0	0	0.00756	0	0	0	0	0	0
d__Bacteria|p__Bacteroidota|c__Bacteroidia|o__Flavobacteriales|f__Flavobacteriaceae|g__Myroides|s__Myroides_unclassified	0	0	0	0	0	0.00756	0	0	0	0	0	0
d__Bacteria|p__Bacteroidota|c__Bacteroidia|o__Flavobacteriales|f__Weeksellaceae	0	0.05365	0.02193	0.08529	0.08661	0.04991	0.07926	0.02622	0.01982	0.04216	0.02001	0.06917
d__Bacteria|p__Bacteroidota|c__Bacteroidia|o__Flavobacteriales|f__Weeksellaceae|g__Bergeyella	0	0.02146	0.00548	0.02693	0.00722	0.01059	0.01372	0	0.01982	0.01561	0	0.01691
d__Bacteria|p__Bacteroidota|c__Bacteroidia|o__Flavobacteriales|f__Weeksellaceae|g__Bergeyella|s__Bergeyella_unclassified	0	0.02146	0.00548	0.02693	0.00722	0.01059	0.01372	0	0.01982	0.01561	0	0.01691
d__Bacteria|p__Bacteroidota|c__Bacteroidia|o__Flavobacteriales|f__Weeksellaceae|g__Chryseobacterium	0	0.03219	0.01645	0.05836	0.07506	0.02873	0.06554	0.02622	0	0.01874	0.02001	0.05226
d__Bacteria|p__Bacteroidota|c__Bacteroidia|o__Flavobacteriales|f__Weeksellaceae|g__Chryseobacterium|s__Chryseobacterium_unclassified	0	0.03219	0.01645	0.05836	0.07506	0.02873	0.06554	0.02622	0	0.01874	0.02001	0.05226
d__Bacteria|p__Bacteroidota|c__Bacteroidia|o__Flavobacteriales|f__Weeksellaceae|g__Weeksella	0	0	0	0	0.00433	0.01059	0	0	0	0.00781	0	0
d__Bacteria|p__Bacteroidota|c__Bacteroidia|o__Flavobacteriales|f__Weeksellaceae|g__Weeksella|s__Weeksella_unclassified	0	0	0	0	0.00433	0.01059	0	0	0	0.00781	0	0
d__Bacteria|p__Bacteroidota|c__Bacteroidia|o__Sphingobacteriales	0	0	0	0	0	0	0	0	0	0	0	0
d__Bacteria|p__Bacteroidota|c__Bacteroidia|o__Sphingobacteriales|f__Sphingobacteriaceae	0	0	0	0	0	0	0	0	0	0	0	0
d__Bacteria|p__Bacteroidota|c__Bacteroidia|o__Sphingobacteriales|f__Sphingobacteriaceae|g__Sphingobacteriaceae_unclassified	0	0	0	0	0	0	0	0	0	0	0	0
d__Bacteria|p__Bacteroidota|c__Bacteroidia|o__Sphingobacteriales|f__Sphingobacteriaceae|g__Sphingobacteriaceae_unclassified|s__Sphingobacteriaceae_unclassified	0	0	0	0	0	0	0	0	0	0	0	0
d__Bacteria|p__Bacteroidota|c__Bacteroidota_unclassified	0.00724	0	0	0.02394	0	0.01059	0.01829	0.02622	0	0	0	0.01383
d__Bacteria|p__Bacteroidota|c__Bacteroidota_unclassified|o__Bacteroidota_unclassified	0.00724	0	0	0.02394	0	0.01059	0.01829	0.02622	0	0	0	0.01383
d__Bacteria|p__Bacteroidota|c__Bacteroidota_unclassified|o__Bacteroidota_unclassified|f__Bacteroidota_unclassified	0.00724	0	0	0.02394	0	0.01059	0.01829	0.02622	0	0	0	0.01383
d__Bacteria|p__Bacteroidota|c__Bacteroidota_unclassified|o__Bacteroidota_unclassified|f__Bacteroidota_unclassified|g__Bacteroidota_unclassified	0.00724	0	0	0.02394	0	0.01059	0.01829	0.02622	0	0	0	0.01383
d__Bacteria|p__Bacteroidota|c__Bacteroidota_unclassified|o__Bacteroidota_unclassified|f__Bacteroidota_unclassified|g__Bacteroidota_unclassified|s__Bacteroidota_unclassified	0.00724	0	0	0.02394	0	0.01059	0.01829	0.02622	0	0	0	0.01383
d__Bacteria|p__Campylobacterota	0	0.07358	0.03702	0.02992	0.04186	0.0363	0.01067	0.0204	0.02744	0.04841	0.0154	0.02152
d__Bacteria|p__Campylobacterota|c__Campylobacteria	0	0.07358	0.03702	0.02992	0.04186	0.0363	0.01067	0.0204	0.02744	0.04841	0.0154	0.02152
d__Bacteria|p__Campylobacterota|c__Campylobacteria|o__Campylobacterales	0	0.07358	0.03702	0.02992	0.04186	0.0363	0.01067	0.0204	0.02744	0.04841	0.0154	0.02152
d__Bacteria|p__Campylobacterota|c__Campylobacteria|o__Campylobacterales|f__Campylobacteraceae	0	0.06132	0.02468	0.01047	0.03031	0.0242	0.01067	0.01457	0.01372	0.0406	0.00924	0.01076
d__Bacteria|p__Campylobacterota|c__Campylobacteria|o__Campylobacterales|f__Campylobacteraceae|g__Campylobacter	0	0.06132	0.02468	0.01047	0.03031	0.0242	0.01067	0.01457	0.01372	0.0406	0.00924	0.01076
d__Bacteria|p__Campylobacterota|c__Campylobacteria|o__Campylobacterales|f__Campylobacteraceae|g__Campylobacter|s__Campylobacter_unclassified	0	0.06132	0.02468	0.01047	0.03031	0.0242	0.01067	0.01457	0.01372	0.0406	0.00924	0.01076
d__Bacteria|p__Campylobacterota|c__Campylobacteria|o__Campylobacterales|f__Helicobacteraceae	0	0.01226	0.01234	0.01945	0.01155	0.0121	0	0.00583	0.01372	0.00781	0.00616	0.01076
d__Bacteria|p__Campylobacterota|c__Campylobacteria|o__Campylobacterales|f__Helicobacteraceae|g__Helicobacter	0	0.01226	0.01234	0.01945	0.01155	0.0121	0	0.00583	0.01372	0.00781	0.00616	0.01076
d__Bacteria|p__Campylobacterota|c__Campylobacteria|o__Campylobacterales|f__Helicobacteraceae|g__Helicobacter|s__Helicobacter_unclassified	0	0.01226	0.01234	0.01945	0.01155	0.0121	0	0.00583	0.01372	0.00781	0.00616	0.01076
d__Bacteria|p__Cyanobacteria	0.17949	0.11805	0.21385	0.03292	0.01011	0	0.08384	0.04952	0.03964	0.09681	0.08928	0.02459
d__Bacteria|p__Cyanobacteria|c__Cyanobacteriia	0	0	0	0	0.00722	0	0.0061	0.0233	0.01677	0.01093	0.00924	0.01537
d__Bacteria|p__Cyanobacteria|c__Cyanobacteriia|o__Chloroplast	0	0	0	0	0.00722	0	0.0061	0.0233	0.01677	0.01093	0.00924	0.01537
d__Bacteria|p__Cyanobacteria|c__Cyanobacteriia|o__Chloroplast|f__Chloroplast_unclassified	0	0	0	0	0.00722	0	0.0061	0.0233	0.01677	0.01093	0.00924	0.01537
d__Bacteria|p__Cyanobacteria|c__Cyanobacteriia|o__Chloroplast|f__Chloroplast_unclassified|g__Chloroplast_unclassified	0	0	0	0	0.00722	0	0.0061	0.0233	0.01677	0.01093	0.00924	0.01537
d__Bacteria|p__Cyanobacteria|c__Cyanobacteriia|o__Chloroplast|f__Chloroplast_unclassified|g__Chloroplast_unclassified|s__Chloroplast_unclassified	0	0	0	0	0.00722	0	0.0061	0.0233	0.01677	0.01093	0.00924	0.01537
d__Bacteria|p__Cyanobacteria|c__Vampirivibrionia	0.17949	0.11805	0.21385	0.03292	0.00289	0	0.07774	0.02622	0.02287	0.08588	0.08004	0.00922
d__Bacteria|p__Cyanobacteria|c__Vampirivibrionia|o__Gastranaerophilales	0.17949	0.11805	0.21385	0.03292	0.00289	0	0.07774	0.02622	0.02287	0.08588	0.08004	0.00922
d__Bacteria|p__Cyanobacteria|c__Vampirivibrionia|o__Gastranaerophilales|f__Gastranaerophilales_unclassified	0.17949	0.11805	0.21385	0.03292	0.00289	0	0.07774	0.02622	0.02287	0.08588	0.08004	0.00922
d__Bacteria|p__Cyanobacteria|c__Vampirivibrionia|o__Gastranaerophilales|f__Gastranaerophilales_unclassified|g__Gastranaerophilales_unclassified	0.17949	0.11805	0.21385	0.03292	0.00289	0	0.07774	0.02622	0.02287	0.08588	0.08004	0.00922
d__Bacteria|p__Cyanobacteria|c__Vampirivibrionia|o__Gastranaerophilales|f__Gastranaerophilales_unclassified|g__Gastranaerophilales_unclassified|s__Gastranaerophilales_unclassified	0.17949	0.11805	0.21385	0.03292	0.00289	0	0.07774	0.02622	0.02287	0.08588	0.08004	0.00922
d__Bacteria|p__Deferribacterota	0.37925	0.04293	0.0233	1.00853	0.81125	0.73949	0.24998	1.39391	0.08689	0.03904	0.50947	0.1537
d__Bacteria|p__Deferribacterota|c__Deferribacteres	0.37925	0.04293	0.0233	1.00853	0.81125	0.73949	0.24998	1.39391	0.08689	0.03904	0.50947	0.1537
d__Bacteria|p__Deferribacterota|c__Deferribacteres|o__Deferribacterales	0.37925	0.04293	0.0233	1.00853	0.81125	0.73949	0.24998	1.39391	0.08689	0.03904	0.50947	0.1537
d__Bacteria|p__Deferribacterota|c__Deferribacteres|o__Deferribacterales|f__Deferribacteraceae	0.37925	0.04293	0.0233	1.00853	0.81125	0.73949	0.24998	1.39391	0.08689	0.03904	0.50947	0.1537
d__Bacteria|p__Deferribacterota|c__Deferribacteres|o__Deferribacterales|f__Deferribacteraceae|g__Mucispirillum	0.37925	0.04293	0.0233	1.00853	0.81125	0.73949	0.24998	1.39391	0.08689	0.03904	0.50947	0.1537
d__Bacteria|p__Deferribacterota|c__Deferribacteres|o__Deferribacterales|f__Deferribacteraceae|g__Mucispirillum|s__Mucispirillum_unclassified	0.37925	0.04293	0.0233	1.00853	0.81125	0.73949	0.24998	1.39391	0.08689	0.03904	0.50947	0.1537
d__Bacteria|p__Deinococcota	0	0.023	0.01919	0.02843	0.0563	0.01663	0.04573	0.02622	0.02287	0.00937	0.01231	0.02767
d__Bacteria|p__Deinococcota|c__Deinococci	0	0.023	0.01919	0.02843	0.0563	0.01663	0.04573	0.02622	0.02287	0.00937	0.01231	0.02767
d__Bacteria|p__Deinococcota|c__Deinococci|o__Deinococcales	0	0.023	0.01919	0.02843	0.0563	0.01663	0.04573	0.02622	0.02287	0.00937	0.01231	0.02767
d__Bacteria|p__Deinococcota|c__Deinococci|o__Deinococcales|f__Deinococcaceae	0	0.023	0.01919	0.02843	0.0563	0.01663	0.04573	0.02622	0.02287	0.00937	0.01231	0.02767
d__Bacteria|p__Deinococcota|c__Deinococci|o__Deinococcales|f__Deinococcaceae|g__Deinococcus	0	0.023	0.01919	0.02843	0.0563	0.01663	0.04573	0.02622	0.02287	0.00937	0.01231	0.02767
d__Bacteria|p__Deinococcota|c__Deinococci|o__Deinococcales|f__Deinococcaceae|g__Deinococcus|s__Deinococcus_unclassified	0	0.023	0.01919	0.02843	0.0563	0.01663	0.04573	0.02622	0.02287	0.00937	0.01231	0.02767
d__Bacteria|p__Desulfobacterota	1.14355	0.44766	0.34956	0.90379	0.51966	0.38563	0.66002	0.30587	0.47106	0.43722	0.8019	0.4442
d__Bacteria|p__Desulfobacterota|c__Desulfovibrionia	1.14355	0.44766	0.34956	0.90379	0.51966	0.38563	0.66002	0.30587	0.47106	0.43722	0.8019	0.4442
d__Bacteria|p__Desulfobacterota|c__Desulfovibrionia|o__Desulfovibrionales	1.14355	0.44766	0.34956	0.90379	0.51966	0.38563	0.66002	0.30587	0.47106	0.43722	0.8019	0.4442
d__Bacteria|p__Desulfobacterota|c__Desulfovibrionia|o__Desulfovibrionales|f__Desulfovibrionaceae	1.14355	0.44766	0.34956	0.90379	0.51966	0.38563	0.66002	0.30587	0.47106	0.43722	0.8019	0.4442
d__Bacteria|p__Desulfobacterota|c__Desulfovibrionia|o__Desulfovibrionales|f__Desulfovibrionaceae|g__Bilophila	0.08106	0.09199	0.0233	0.2439	0.14291	0.03932	0.0564	0.03204	0.0686	0.11399	0.16007	0.05687
d__Bacteria|p__Desulfobacterota|c__Desulfovibrionia|o__Desulfovibrionales|f__Desulfovibrionaceae|g__Bilophila|s__Bilophila_unclassified	0.08106	0.09199	0.0233	0.2439	0.14291	0.03932	0.0564	0.03204	0.0686	0.11399	0.16007	0.05687
d__Bacteria|p__Desulfobacterota|c__Desulfovibrionia|o__Desulfovibrionales|f__Desulfovibrionaceae|g__Desulfovibrio	0.02606	0.10578	0.11926	0.42197	0.20209	0.17996	0.24084	0.18061	0.19513	0.17489	0.49869	0.17522
d__Bacteria|p__Desulfobacterota|c__Desulfovibrionia|o__Desulfovibrionales|f__Desulfovibrionaceae|g__Desulfovibrionaceae_unclassified	1.03643	0.24989	0.207	0.23792	0.17466	0.16635	0.36278	0.09322	0.20733	0.14834	0.14314	0.21211
d__Bacteria|p__Desulfobacterota|c__Desulfovibrionia|o__Desulfovibrionales|f__Desulfovibrionaceae|g__Desulfovibrionaceae_unclassified|s__Desulfovibrionaceae_unclassified	1.03643	0.24989	0.207	0.23792	0.17466	0.16635	0.36278	0.09322	0.20733	0.14834	0.14314	0.21211
d__Bacteria|p__Desulfobacterota|c__Desulfovibrionia|o__Desulfovibrionales|f__Desulfovibrionaceae|g__Desulfovibrio|s__Desulfovibrio_unclassified	0.02606	0.10578	0.11926	0.42197	0.20209	0.17996	0.24084	0.18061	0.19513	0.17489	0.49869	0.17522
d__Bacteria|p__Elusimicrobiota	0	0	0	0	0	0	0	0	0	0	0	0
d__Bacteria|p__Elusimicrobiota|c__Elusimicrobia	0	0	0	0	0	0	0	0	0	0	0	0
d__Bacteria|p__Elusimicrobiota|c__Elusimicrobia|o__Elusimicrobiales	0	0	0	0	0	0	0	0	0	0	0	0
d__Bacteria|p__Elusimicrobiota|c__Elusimicrobia|o__Elusimicrobiales|f__Elusimicrobiaceae	0	0	0	0	0	0	0	0	0	0	0	0
d__Bacteria|p__Elusimicrobiota|c__Elusimicrobia|o__Elusimicrobiales|f__Elusimicrobiaceae|g__Elusimicrobium	0	0	0	0	0	0	0	0	0	0	0	0
d__Bacteria|p__Elusimicrobiota|c__Elusimicrobia|o__Elusimicrobiales|f__Elusimicrobiaceae|g__Elusimicrobium|s__Elusimicrobium_unclassified	0	0	0	0	0	0	0	0	0	0	0	0
d__Bacteria|p__Firmicutes	23.7787	49.304	24.634	67.3874	69.9622	88.3195	81.0334	65.684	35.2745	75.2865	79.5952	33.9881
d__Bacteria|p__Firmicutes|c__Bacilli	3.3858	40.6236	17.8456	24.9274	48.6922	69.1609	56.1451	49.3664	15.5007	53.2869	26.2229	13.7948
d__Bacteria|p__Firmicutes|c__Bacilli|o__Acholeplasmatales	0	0	0	0.00299	0	0	0.04725	0	0	0	0.05079	0
d__Bacteria|p__Firmicutes|c__Bacilli|o__Acholeplasmatales|f__Acholeplasmataceae	0	0	0	0.00299	0	0	0.04725	0	0	0	0.05079	0
d__Bacteria|p__Firmicutes|c__Bacilli|o__Acholeplasmatales|f__Acholeplasmataceae|g__Anaeroplasma	0	0	0	0.00299	0	0	0.04725	0	0	0	0.05079	0
d__Bacteria|p__Firmicutes|c__Bacilli|o__Acholeplasmatales|f__Acholeplasmataceae|g__Anaeroplasma|s__Anaeroplasma_unclassified	0	0	0	0.00299	0	0	0.04725	0	0	0	0.05079	0
d__Bacteria|p__Firmicutes|c__Bacilli|o__Bacillales	0.01303	0	0	0	0	0	0	0	0	0	0	0
d__Bacteria|p__Firmicutes|c__Bacilli|o__Bacillales|f__Bacillaceae	0.01303	0	0	0	0	0	0	0	0	0	0	0
d__Bacteria|p__Firmicutes|c__Bacilli|o__Bacillales|f__Bacillaceae|g__Bacillus	0.01303	0	0	0	0	0	0	0	0	0	0	0
d__Bacteria|p__Firmicutes|c__Bacilli|o__Bacillales|f__Bacillaceae|g__Bacillus|s__Bacillus_sp._enrichment_culture_clone_HM-01	0.01303	0	0	0	0	0	0	0	0	0	0	0
d__Bacteria|p__Firmicutes|c__Bacilli|o__Erysipelotrichales	0.262	0.28209	0.68543	0.18105	0.17611	0.1618	0.17682	0.6802	0.23324	0.71517	0.06465	0.55024
d__Bacteria|p__Firmicutes|c__Bacilli|o__Erysipelotrichales|f__Erysipelatoclostridiaceae	0.21713	0.07359	0.66624	0.03591	0.05919	0.01663	0.08536	0.32918	0.16007	0.25452	0.02463	0.4196
d__Bacteria|p__Firmicutes|c__Bacilli|o__Erysipelotrichales|f__Erysipelatoclostridiaceae|g__Candidatus_Stoquefichus	0.1491	0.00767	0.37013	0	0.01155	0	0	0	0.03811	0	0.00924	0
d__Bacteria|p__Firmicutes|c__Bacilli|o__Erysipelotrichales|f__Erysipelatoclostridiaceae|g__Candidatus_Stoquefichus|s__Candidatus_Stoquefichus_unclassified	0.1491	0.00767	0.37013	0	0.01155	0	0	0	0.03811	0	0.00924	0
d__Bacteria|p__Firmicutes|c__Bacilli|o__Erysipelotrichales|f__Erysipelatoclostridiaceae|g__Erysipelatoclostridiaceae_unclassified	0	0	0	0	0	0	0	0	0	0.00625	0	0
d__Bacteria|p__Firmicutes|c__Bacilli|o__Erysipelotrichales|f__Erysipelatoclostridiaceae|g__Erysipelatoclostridiaceae_unclassified|s__Erysipelatoclostridiaceae_unclassified	0	0	0	0	0	0	0	0	0	0.00625	0	0
d__Bacteria|p__Firmicutes|c__Bacilli|o__Erysipelotrichales|f__Erysipelatoclostridiaceae|g__Erysipelatoclostridium	0.06803	0.06592	0.28651	0.03591	0.04331	0.01663	0.08536	0.32918	0.10824	0.24827	0.01077	0.41653
d__Bacteria|p__Firmicutes|c__Bacilli|o__Erysipelotrichales|f__Erysipelatoclostridiaceae|g__Erysipelatoclostridium|s__Erysipelatoclostridium_unclassified	0.06803	0.06592	0.28651	0.03591	0.04331	0.01663	0.08536	0.32918	0.10824	0.24827	0.01077	0.41653
d__Bacteria|p__Firmicutes|c__Bacilli|o__Erysipelotrichales|f__Erysipelatoclostridiaceae|g__Erysipelotrichaceae_UCG-003	0	0	0.0096	0	0.00433	0	0	0	0.01372	0	0.00462	0.00307
d__Bacteria|p__Firmicutes|c__Bacilli|o__Erysipelotrichales|f__Erysipelatoclostridiaceae|g__Erysipelotrichaceae_UCG-003|s__Erysipelotrichaceae_UCG-003_unclassified	0	0	0.0096	0	0.00433	0	0	0	0.01372	0	0.00462	0.00307
d__Bacteria|p__Firmicutes|c__Bacilli|o__Erysipelotrichales|f__Erysipelotrichaceae	0.04487	0.2085	0.01919	0.14514	0.11692	0.14517	0.09146	0.35102	0.07317	0.46065	0.04002	0.13064
d__Bacteria|p__Firmicutes|c__Bacilli|o__Erysipelotrichales|f__Erysipelotrichaceae|g__Allobaculum	0	0	0	0.03292	0	0	0.01372	0.01602	0.00457	0	0	0.01998
d__Bacteria|p__Firmicutes|c__Bacilli|o__Erysipelotrichales|f__Erysipelotrichaceae|g__Allobaculum|s__Allobaculum_unclassified	0	0	0	0.03292	0	0	0.01372	0.01602	0.00457	0	0	0.01998
d__Bacteria|p__Firmicutes|c__Bacilli|o__Erysipelotrichales|f__Erysipelotrichaceae|g__Dielma	0	0	0	0.00449	0	0	0	0	0	0	0	0
d__Bacteria|p__Firmicutes|c__Bacilli|o__Erysipelotrichales|f__Erysipelotrichaceae|g__Dielma|s__Dielma_unclassified	0	0	0	0.00449	0	0	0	0	0	0	0	0
d__Bacteria|p__Firmicutes|c__Bacilli|o__Erysipelotrichales|f__Erysipelotrichaceae|g__Dubosiella	0.01158	0.01993	0	0.04489	0	0	0	0	0.01067	0	0	0.0292
d__Bacteria|p__Firmicutes|c__Bacilli|o__Erysipelotrichales|f__Erysipelotrichaceae|g__Dubosiella|s__Dubosiella_unclassified	0.01158	0.01993	0	0.04489	0	0	0	0	0.01067	0	0	0.0292
d__Bacteria|p__Firmicutes|c__Bacilli|o__Erysipelotrichales|f__Erysipelotrichaceae|g__Erysipelotrichaceae_unclassified	0.03329	0.16404	0.00685	0.03142	0.06929	0.09527	0.02134	0.27966	0.00762	0.40911	0.01847	0.02306
d__Bacteria|p__Firmicutes|c__Bacilli|o__Erysipelotrichales|f__Erysipelotrichaceae|g__Erysipelotrichaceae_unclassified|s__Erysipelotrichaceae_unclassified	0.03329	0.16404	0.00685	0.03142	0.06929	0.09527	0.02134	0.27966	0.00762	0.40911	0.01847	0.02306
d__Bacteria|p__Firmicutes|c__Bacilli|o__Erysipelotrichales|f__Erysipelotrichaceae|g__Faecalibaculum	0	0.00767	0.00823	0.01197	0.02598	0.01059	0.01677	0.01602	0.0122	0.00781	0	0.00922
d__Bacteria|p__Firmicutes|c__Bacilli|o__Erysipelotrichales|f__Erysipelotrichaceae|g__Faecalibaculum|s__Faecalibaculum_unclassified	0	0.00767	0.00823	0.01197	0.02598	0.01059	0.01677	0.01602	0.0122	0.00781	0	0.00922
d__Bacteria|p__Firmicutes|c__Bacilli|o__Erysipelotrichales|f__Erysipelotrichaceae|g__Ileibacterium	0	0.01686	0	0.01945	0.01155	0.02268	0.02286	0.01893	0.01677	0.02655	0.02155	0.01844
d__Bacteria|p__Firmicutes|c__Bacilli|o__Erysipelotrichales|f__Erysipelotrichaceae|g__Ileibacterium|s__Ileibacterium_unclassified	0	0.01686	0	0.01945	0.01155	0.02268	0.02286	0.01893	0.01677	0.02655	0.02155	0.01844
d__Bacteria|p__Firmicutes|c__Bacilli|o__Erysipelotrichales|f__Erysipelotrichaceae|g__Turicibacter	0	0	0.00411	0	0.0101	0.01663	0.01677	0.02039	0.02134	0.01718	0	0.03074
d__Bacteria|p__Firmicutes|c__Bacilli|o__Erysipelotrichales|f__Erysipelotrichaceae|g__Turicibacter|s__Turicibacter_unclassified	0	0	0.00411	0	0.0101	0.01663	0.01677	0.02039	0.02134	0.01718	0	0.03074
d__Bacteria|p__Firmicutes|c__Bacilli|o__Exiguobacterales	0	0	0.02742	0	0	0.0121	0.01067	0.00583	0.01524	0	0.02617	0
d__Bacteria|p__Firmicutes|c__Bacilli|o__Exiguobacterales|f__Exiguobacteraceae	0	0	0.02742	0	0	0.0121	0.01067	0.00583	0.01524	0	0.02617	0
d__Bacteria|p__Firmicutes|c__Bacilli|o__Exiguobacterales|f__Exiguobacteraceae|g__Exiguobacterium	0	0	0.02742	0	0	0.0121	0.01067	0.00583	0.01524	0	0.02617	0
d__Bacteria|p__Firmicutes|c__Bacilli|o__Exiguobacterales|f__Exiguobacteraceae|g__Exiguobacterium|s__Exiguobacterium_unclassified	0	0	0.02742	0	0	0.0121	0.01067	0.00583	0.01524	0	0.02617	0
d__Bacteria|p__Firmicutes|c__Bacilli|o__Lactobacillales	3.05575	39.8862	15.9168	20.603	47.1938	64.0722	53.0905	42.9839	14.3192	46.0713	20.7973	12.9694
d__Bacteria|p__Firmicutes|c__Bacilli|o__Lactobacillales|f__Aerococcaceae	0	0.01073	0.0096	0.02544	0.08228	0.02571	0.0564	0.02476	0.0061	0.01249	0.00616	0.01999
d__Bacteria|p__Firmicutes|c__Bacilli|o__Lactobacillales|f__Aerococcaceae|g__Aerococcus	0	0.01073	0.0096	0.02245	0.07939	0.02117	0.0503	0.01893	0.0061	0.01249	0.00616	0.0123
d__Bacteria|p__Firmicutes|c__Bacilli|o__Lactobacillales|f__Aerococcaceae|g__Aerococcus|s__Aerococcus_sp._148a	0	0.01073	0.0096	0.02245	0.07939	0.02117	0.0503	0.01893	0.0061	0.01249	0.00616	0.0123
d__Bacteria|p__Firmicutes|c__Bacilli|o__Lactobacillales|f__Aerococcaceae|g__Facklamia	0	0	0	0.00299	0.00289	0.00454	0.0061	0.00583	0	0	0	0.00769
d__Bacteria|p__Firmicutes|c__Bacilli|o__Lactobacillales|f__Aerococcaceae|g__Facklamia|s__Facklamia_tabacinasalis	0	0	0	0.00299	0.00289	0.00454	0.0061	0.00583	0	0	0	0.00769
d__Bacteria|p__Firmicutes|c__Bacilli|o__Lactobacillales|f__Carnobacteriaceae	0	0.01073	0.02193	0.00748	0.00722	0.00907	0.00762	0.00728	0.0061	0.00468	0.01539	0.00769
d__Bacteria|p__Firmicutes|c__Bacilli|o__Lactobacillales|f__Carnobacteriaceae|g__Atopobacter	0	0.00613	0	0.00748	0.00433	0.00907	0.00762	0.00728	0	0	0	0.00769
d__Bacteria|p__Firmicutes|c__Bacilli|o__Lactobacillales|f__Carnobacteriaceae|g__Atopobacter|s__Atopobacter_phocae	0	0.00613	0	0.00748	0.00433	0.00907	0.00762	0.00728	0	0	0	0.00769
d__Bacteria|p__Firmicutes|c__Bacilli|o__Lactobacillales|f__Carnobacteriaceae|g__Desemzia	0	0.0046	0.02193	0	0	0	0	0	0.0061	0	0.01539	0
d__Bacteria|p__Firmicutes|c__Bacilli|o__Lactobacillales|f__Carnobacteriaceae|g__Desemzia|s__Desemzia_unclassified	0	0.0046	0.02193	0	0	0	0	0	0.0061	0	0.01539	0
d__Bacteria|p__Firmicutes|c__Bacilli|o__Lactobacillales|f__Carnobacteriaceae|g__Jeotgalibaca	0	0	0	0	0	0	0	0	0	0.00468	0	0
d__Bacteria|p__Firmicutes|c__Bacilli|o__Lactobacillales|f__Carnobacteriaceae|g__Jeotgalibaca|s__Jeotgalibaca_sp._PTS2502	0	0	0	0	0	0	0	0	0	0.00468	0	0
d__Bacteria|p__Firmicutes|c__Bacilli|o__Lactobacillales|f__Carnobacteriaceae|g__Trichococcus	0	0	0	0	0.00289	0	0	0	0	0	0	0
d__Bacteria|p__Firmicutes|c__Bacilli|o__Lactobacillales|f__Carnobacteriaceae|g__Trichococcus|s__uncultured_Trichococcus_sp.	0	0	0	0	0.00289	0	0	0	0	0	0	0
d__Bacteria|p__Firmicutes|c__Bacilli|o__Lactobacillales|f__Enterococcaceae	0.01592	0.02606	0.06854	0.07482	0.01444	0.03024	0.02286	0.0568	0.00915	0.03435	0.02771	0.05841
d__Bacteria|p__Firmicutes|c__Bacilli|o__Lactobacillales|f__Enterococcaceae|g__Enterococcus	0.01592	0.02606	0.06854	0.07482	0.01444	0.03024	0.02286	0.0568	0.00915	0.03435	0.02771	0.05841
d__Bacteria|p__Firmicutes|c__Bacilli|o__Lactobacillales|f__Enterococcaceae|g__Enterococcus|s__Enterococcus_faecalis	0	0.02606	0.06854	0.01347	0.01444	0.03024	0.02286	0.0568	0.00915	0.03435	0.02771	0.00461
d__Bacteria|p__Firmicutes|c__Bacilli|o__Lactobacillales|f__Enterococcaceae|g__Enterococcus|s__Enterococcus_faecium	0.01592	0	0	0.06135	0	0	0	0	0	0	0	0.0538
d__Bacteria|p__Firmicutes|c__Bacilli|o__Lactobacillales|f__Lactobacillaceae	2.77927	39.4876	15.0477	19.9701	46.5804	63.2677	52.4899	42.2731	13.8939	45.4405	19.9615	12.4007
d__Bacteria|p__Firmicutes|c__Bacilli|o__Lactobacillales|f__Lactobacillaceae|g__HT002	0.3228	0.26829	0.23167	0.17956	0.32046	0.28279	0.81701	0.60883	0.14482	0.34196	0.49715	0.21826
d__Bacteria|p__Firmicutes|c__Bacilli|o__Lactobacillales|f__Lactobacillaceae|g__HT002|s__HT002_unclassified	0.3228	0.26829	0.23167	0.17956	0.32046	0.28279	0.81701	0.60883	0.14482	0.34196	0.49715	0.21826
d__Bacteria|p__Firmicutes|c__Bacilli|o__Lactobacillales|f__Lactobacillaceae|g__Lactiplantibacillus	0.61665	0	0	0.00449	0	0	0	0	0	0	0	0
d__Bacteria|p__Firmicutes|c__Bacilli|o__Lactobacillales|f__Lactobacillaceae|g__Lactiplantibacillus|s__Lactiplantibacillus_unclassified	0.61665	0	0	0.00449	0	0	0	0	0	0	0	0
d__Bacteria|p__Firmicutes|c__Bacilli|o__Lactobacillales|f__Lactobacillaceae|g__Lactobacillus	0.16647	0.37407	0.37423	0.43393	0.4013	0.3085	0.40241	0.36851	0.27288	0.39661	0.64646	0.34582
d__Bacteria|p__Firmicutes|c__Bacilli|o__Lactobacillales|f__Lactobacillaceae|g__Lactobacillus|s__Lactobacillus_crispatus	0	0	0	0	0.00722	0	0	0	0	0.00312	0	0.00307
d__Bacteria|p__Firmicutes|c__Bacilli|o__Lactobacillales|f__Lactobacillaceae|g__Lactobacillus|s__Lactobacillus_hominis	0	0	0.03975	0	0	0	0	0	0	0	0.05849	0
d__Bacteria|p__Firmicutes|c__Bacilli|o__Lactobacillales|f__Lactobacillaceae|g__Lactobacillus|s__Lactobacillus_intestinalis	0	0.01073	0	0.01047	0	0	0	0	0	0	0	0
d__Bacteria|p__Firmicutes|c__Bacilli|o__Lactobacillales|f__Lactobacillaceae|g__Lactobacillus|s__Lactobacillus_sp._L-YJ	0.16647	0.23456	0.23578	0.31273	0.24973	0.19659	0.26065	0.27092	0.16922	0.26701	0.47099	0.21979
d__Bacteria|p__Firmicutes|c__Bacilli|o__Lactobacillales|f__Lactobacillaceae|g__Lactobacillus|s__Lactobacillus_taiwanensis	0	0.12878	0.0987	0.11073	0.14435	0.11191	0.14176	0.09759	0.10366	0.12648	0.11698	0.12296
d__Bacteria|p__Firmicutes|c__Bacilli|o__Lactobacillales|f__Lactobacillaceae|g__Lentilactobacillus	0.02316	0	0	0.00748	0.00433	0	0.00915	0	0.00762	0	0	0.00615
d__Bacteria|p__Firmicutes|c__Bacilli|o__Lactobacillales|f__Lactobacillaceae|g__Lentilactobacillus|s__Lentilactobacillus_unclassified	0.02316	0	0	0.00748	0.00433	0	0.00915	0	0.00762	0	0	0.00615
d__Bacteria|p__Firmicutes|c__Bacilli|o__Lactobacillales|f__Lactobacillaceae|g__Ligilactobacillus	1.65019	38.8299	10.6816	19.3446	45.8499	62.6764	51.2583	41.2957	13.4686	44.6847	18.7995	11.583
d__Bacteria|p__Firmicutes|c__Bacilli|o__Lactobacillales|f__Lactobacillaceae|g__Ligilactobacillus|s__Ligilactobacillus_unclassified	1.65019	38.8299	10.6816	19.3446	45.8499	62.6764	51.2583	41.2957	13.4686	44.6847	18.7995	11.583
d__Bacteria|p__Firmicutes|c__Bacilli|o__Lactobacillales|f__Lactobacillaceae|g__Limosilactobacillus	0	0.01533	0	0	0.00433	0	0.00305	0	0	0.01718	0	0
d__Bacteria|p__Firmicutes|c__Bacilli|o__Lactobacillales|f__Lactobacillaceae|g__Limosilactobacillus|s__Limosilactobacillus_unclassified	0	0.01533	0	0	0.00433	0	0.00305	0	0	0.01718	0	0
d__Bacteria|p__Firmicutes|c__Bacilli|o__Lactobacillales|f__Lactobacillaceae|g__Weissella	0	0	3.76021	0	0	0	0	0	0	0	0.01847	0.24746
d__Bacteria|p__Firmicutes|c__Bacilli|o__Lactobacillales|f__Lactobacillaceae|g__Weissella|s__Weissella_unclassified	0	0	3.76021	0	0	0	0	0	0	0	0.01847	0.24746
d__Bacteria|p__Firmicutes|c__Bacilli|o__Lactobacillales|f__Streptococcaceae	0.26056	0.35108	0.76904	0.52521	0.50956	0.7395	0.51368	0.62194	0.40397	0.57931	0.78652	0.48262
d__Bacteria|p__Firmicutes|c__Bacilli|o__Lactobacillales|f__Streptococcaceae|g__Streptococcus	0.26056	0.35108	0.76904	0.52521	0.50956	0.7395	0.51368	0.62194	0.40397	0.57931	0.78652	0.48262
d__Bacteria|p__Firmicutes|c__Bacilli|o__Lactobacillales|f__Streptococcaceae|g__Streptococcus|s__Streptococcus_constellatus	0	0	0.00548	0	0	0	0	0	0	0	0.00924	0
d__Bacteria|p__Firmicutes|c__Bacilli|o__Lactobacillales|f__Streptococcaceae|g__Streptococcus|s__Streptococcus_danieliae	0.15923	0.02913	0.21385	0.11223	0.04908	0.13157	0.11432	0.21265	0.01524	0.22954	0.24781	0.09376
d__Bacteria|p__Firmicutes|c__Bacilli|o__Lactobacillales|f__Streptococcaceae|g__Streptococcus|s__Streptococcus_equinus	0	0	0	0	0	0	0	0.14565	0	0	0	0
d__Bacteria|p__Firmicutes|c__Bacilli|o__Lactobacillales|f__Streptococcaceae|g__Streptococcus|s__Streptococcus_ferus	0	0.05979	0.12749	0.10624	0.06496	0.09376	0.08536	0.03496	0.06098	0.03748	0.14006	0.09222
d__Bacteria|p__Firmicutes|c__Bacilli|o__Lactobacillales|f__Streptococcaceae|g__Streptococcus|s__Streptococcus_hyointestinalis	0	0	0.02468	0.02693	0.02743	0.02722	0	0.01311	0.01524	0.02342	0.01539	0.02306
d__Bacteria|p__Firmicutes|c__Bacilli|o__Lactobacillales|f__Streptococcaceae|g__Streptococcus|s__Streptococcus_parasanguinis	0	0	0.02056	0	0.02743	0	0.03201	0	0	0	0	0
d__Bacteria|p__Firmicutes|c__Bacilli|o__Lactobacillales|f__Streptococcaceae|g__Streptococcus|s__Streptococcus_sp.	0	0.00767	0	0	0	0	0	0	0	0	0	0
d__Bacteria|p__Firmicutes|c__Bacilli|o__Lactobacillales|f__Streptococcaceae|g__Streptococcus|s__Streptococcus_sp._GDLAMI-SD2	0	0.04139	0.0233	0.05686	0.05052	0.09225	0.06097	0.04515	0.05488	0.05153	0	0.04918
d__Bacteria|p__Firmicutes|c__Bacilli|o__Lactobacillales|f__Streptococcaceae|g__Streptococcus|s__Streptococcus_sp._NUM_1428	0	0.11345	0.20837	0.13317	0.21508	0.2722	0.13566	0.067	0.21952	0.09525	0.22472	0.13833
d__Bacteria|p__Firmicutes|c__Bacilli|o__Lactobacillales|f__Streptococcaceae|g__Streptococcus|s__Streptococcus_sp._enrichment_culture	0	0	0	0	0	0	0	0	0	0	0	0
d__Bacteria|p__Firmicutes|c__Bacilli|o__Lactobacillales|f__Streptococcaceae|g__Streptococcus|s__Streptococcus_thoraltensis	0	0	0	0	0	0	0	0.00583	0	0	0	0
d__Bacteria|p__Firmicutes|c__Bacilli|o__Lactobacillales|f__Streptococcaceae|g__Streptococcus|s__Streptococcus_unclassified	0	0.04446	0.08362	0.0389	0.02021	0.01059	0.01982	0	0	0.04528	0.10466	0.03689
d__Bacteria|p__Firmicutes|c__Bacilli|o__Lactobacillales|f__Streptococcaceae|g__Streptococcus|s__uncultured_Streptococcus_sp.	0.10133	0.05519	0.06169	0.05088	0.05485	0.11191	0.06554	0.09759	0.03811	0.09681	0.04464	0.04918
d__Bacteria|p__Firmicutes|c__Bacilli|o__Mycoplasmatales	0.04343	0.28055	0.04935	3.72138	1.07252	4.42936	2.67358	5.16197	0.68601	5.66972	5.0608	0.11374
d__Bacteria|p__Firmicutes|c__Bacilli|o__Mycoplasmatales|f__Mycoplasmataceae	0.04343	0.28055	0.04935	3.72138	1.07252	4.42936	2.67358	5.16197	0.68601	5.66972	5.0608	0.11374
d__Bacteria|p__Firmicutes|c__Bacilli|o__Mycoplasmatales|f__Mycoplasmataceae|g__Mycoplasma	0.04343	0.28055	0.04935	3.72138	1.07252	4.42936	2.67358	5.16197	0.68601	5.66972	5.0608	0.11374
d__Bacteria|p__Firmicutes|c__Bacilli|o__Mycoplasmatales|f__Mycoplasmataceae|g__Mycoplasma|s__Mycoplasma_unclassified	0.04343	0.28055	0.04935	3.72138	1.07252	4.42936	2.67358	5.16197	0.68601	5.66972	5.0608	0.11374
d__Bacteria|p__Firmicutes|c__Bacilli|o__Paenibacillales	0.0029	0	0	0	0	0	0	0	0	0	0	0
d__Bacteria|p__Firmicutes|c__Bacilli|o__Paenibacillales|f__Paenibacillaceae	0.0029	0	0	0	0	0	0	0	0	0	0	0
d__Bacteria|p__Firmicutes|c__Bacilli|o__Paenibacillales|f__Paenibacillaceae|g__Paenibacillus	0.0029	0	0	0	0	0	0	0	0	0	0	0
d__Bacteria|p__Firmicutes|c__Bacilli|o__Paenibacillales|f__Paenibacillaceae|g__Paenibacillus|s__Paenibacillus_unclassified	0.0029	0	0	0	0	0	0	0	0	0	0	0
d__Bacteria|p__Firmicutes|c__Bacilli|o__RF39	0.00869	0.10425	0.03838	0.17507	0.03897	0.03176	0.05792	0.27529	0.12196	0.64489	0.1847	0.00922
d__Bacteria|p__Firmicutes|c__Bacilli|o__RF39|f__RF39_unclassified	0.00869	0.10425	0.03838	0.17507	0.03897	0.03176	0.05792	0.27529	0.12196	0.64489	0.1847	0.00922
d__Bacteria|p__Firmicutes|c__Bacilli|o__RF39|f__RF39_unclassified|g__RF39_unclassified	0.00869	0.10425	0.03838	0.17507	0.03897	0.03176	0.05792	0.27529	0.12196	0.64489	0.1847	0.00922
d__Bacteria|p__Firmicutes|c__Bacilli|o__RF39|f__RF39_unclassified|g__RF39_unclassified|s__RF39_unclassified	0.00869	0.10425	0.03838	0.17507	0.03897	0.03176	0.05792	0.27529	0.12196	0.64489	0.1847	0.00922
d__Bacteria|p__Firmicutes|c__Bacilli|o__Staphylococcales	0	0.07052	1.1282	0.2439	0.21075	0.45368	0.08841	0.25926	0.125	0.18581	0.03848	0.15217
d__Bacteria|p__Firmicutes|c__Bacilli|o__Staphylococcales|f__Gemellaceae	0	0.03986	0.03153	0.15412	0.04331	0.05142	0.0625	0.05826	0.08994	0.04372	0.02155	0.13526
d__Bacteria|p__Firmicutes|c__Bacilli|o__Staphylococcales|f__Gemellaceae|g__Gemella	0	0.03986	0.03153	0.15412	0.04331	0.05142	0.0625	0.05826	0.08994	0.04372	0.02155	0.13526
d__Bacteria|p__Firmicutes|c__Bacilli|o__Staphylococcales|f__Gemellaceae|g__Gemella|s__Gemella_unclassified	0	0.03986	0.03153	0.15412	0.04331	0.05142	0.0625	0.05826	0.08994	0.04372	0.02155	0.13526
d__Bacteria|p__Firmicutes|c__Bacilli|o__Staphylococcales|f__Staphylococcaceae	0	0.03066	1.09667	0.08978	0.16744	0.40226	0.02591	0.201	0.03506	0.14209	0.01693	0.01691
d__Bacteria|p__Firmicutes|c__Bacilli|o__Staphylococcales|f__Staphylococcaceae|g__Staphylococcaceae_unclassified	0	0.03066	0.15216	0.08978	0.15734	0.40226	0.02591	0.18352	0.03506	0.14209	0.01693	0.01076
d__Bacteria|p__Firmicutes|c__Bacilli|o__Staphylococcales|f__Staphylococcaceae|g__Staphylococcaceae_unclassified|s__Staphylococcaceae_unclassified	0	0.03066	0.15216	0.08978	0.15734	0.40226	0.02591	0.18352	0.03506	0.14209	0.01693	0.01076
d__Bacteria|p__Firmicutes|c__Bacilli|o__Staphylococcales|f__Staphylococcaceae|g__Staphylococcus	0	0	0.94451	0	0.0101	0	0	0.01748	0	0	0	0.00615
d__Bacteria|p__Firmicutes|c__Bacilli|o__Staphylococcales|f__Staphylococcaceae|g__Staphylococcus|s__Staphylococcus_unclassified	0	0	0.94451	0	0.0101	0	0	0.01748	0	0	0	0.00615
d__Bacteria|p__Firmicutes|c__Clostridia	19.5722	8.13149	6.06189	41.2091	20.3216	18.3843	24.2801	15.2136	19.0359	21.3797	52.2026	19.1805
d__Bacteria|p__Firmicutes|c__Clostridia|o__Christensenellales	0.06659	0.0138	0.01096	0.02693	0.00289	0	0.00762	0.02767	0.12044	0.00468	0.05541	0.03689
d__Bacteria|p__Firmicutes|c__Clostridia|o__Christensenellales|f__Christensenellaceae	0.06659	0.0138	0.01096	0.02693	0.00289	0	0.00762	0.02767	0.12044	0.00468	0.05541	0.03689
d__Bacteria|p__Firmicutes|c__Clostridia|o__Christensenellales|f__Christensenellaceae|g__Christensenellaceae_R-7_group	0.05501	0	0.00548	0	0	0	0	0.00874	0.0808	0	0	0.0123
d__Bacteria|p__Firmicutes|c__Clostridia|o__Christensenellales|f__Christensenellaceae|g__Christensenellaceae_R-7_group|s__Christensenellaceae_R-7_group_unclassified	0.05501	0	0.00548	0	0	0	0	0.00874	0.0808	0	0	0.0123
d__Bacteria|p__Firmicutes|c__Clostridia|o__Christensenellales|f__Christensenellaceae|g__Christensenellaceae_unclassified	0.01158	0.0138	0.00548	0.02693	0.00289	0	0.00762	0.01893	0.03964	0.00468	0.05541	0.02459
d__Bacteria|p__Firmicutes|c__Clostridia|o__Christensenellales|f__Christensenellaceae|g__Christensenellaceae_unclassified|s__Christensenellaceae_unclassified	0.01158	0.0138	0.00548	0.02693	0.00289	0	0.00762	0.01893	0.03964	0.00468	0.05541	0.02459
d__Bacteria|p__Firmicutes|c__Clostridia|o__Clostridia_UCG-014	4.166	2.47593	0.42633	5.1444	1.91408	1.45478	1.4069	5.01631	4.07641	3.57578	1.98091	3.37376
d__Bacteria|p__Firmicutes|c__Clostridia|o__Clostridia_UCG-014|f__Clostridia_UCG-014_unclassified	4.166	2.47593	0.42633	5.1444	1.91408	1.45478	1.4069	5.01631	4.07641	3.57578	1.98091	3.37376
d__Bacteria|p__Firmicutes|c__Clostridia|o__Clostridia_UCG-014|f__Clostridia_UCG-014_unclassified|g__Clostridia_UCG-014_unclassified	4.166	2.47593	0.42633	5.1444	1.91408	1.45478	1.4069	5.01631	4.07641	3.57578	1.98091	3.37376
d__Bacteria|p__Firmicutes|c__Clostridia|o__Clostridia_UCG-014|f__Clostridia_UCG-014_unclassified|g__Clostridia_UCG-014_unclassified|s__Clostridia_UCG-014_unclassified	4.166	2.47593	0.42633	5.1444	1.91408	1.45478	1.4069	5.01631	4.07641	3.57578	1.98091	3.37376
d__Bacteria|p__Firmicutes|c__Clostridia|o__Clostridia_vadinBB60_group	0.03185	0	0.01097	0.38306	0.11404	0.02873	0.24846	0.15002	0.12805	0.01874	0.31399	0.03381
d__Bacteria|p__Firmicutes|c__Clostridia|o__Clostridia_vadinBB60_group|f__Clostridia_vadinBB60_group_unclassified	0.03185	0	0.01097	0.38306	0.11404	0.02873	0.24846	0.15002	0.12805	0.01874	0.31399	0.03381
d__Bacteria|p__Firmicutes|c__Clostridia|o__Clostridia_vadinBB60_group|f__Clostridia_vadinBB60_group_unclassified|g__Clostridia_vadinBB60_group_unclassified	0.03185	0	0.01097	0.38306	0.11404	0.02873	0.24846	0.15002	0.12805	0.01874	0.31399	0.03381
d__Bacteria|p__Firmicutes|c__Clostridia|o__Clostridia_vadinBB60_group|f__Clostridia_vadinBB60_group_unclassified|g__Clostridia_vadinBB60_group_unclassified|s__Clostridia_vadinBB60_group_unclassified	0.03185	0	0.01097	0.38306	0.11404	0.02873	0.24846	0.15002	0.12805	0.01874	0.31399	0.03381
d__Bacteria|p__Firmicutes|c__Clostridia|o__Clostridiales	7.10596	2.15707	1.23515	15.095	7.72564	7.18014	10.583	3.81616	7.70158	8.43352	22.1287	8.19077
d__Bacteria|p__Firmicutes|c__Clostridia|o__Clostridiales|f__Clostridiaceae	0.29675	0.41854	0.18234	1.71181	0.34501	0.39924	0.91303	0.61176	0.67991	1.14768	2.73819	1.01137
d__Bacteria|p__Firmicutes|c__Clostridia|o__Clostridiales|f__Clostridiaceae|g__Butyricicoccus	0	0	0	0	0	0	0.00305	0	0	0	0	0
d__Bacteria|p__Firmicutes|c__Clostridia|o__Clostridiales|f__Clostridiaceae|g__Butyricicoccus|s__Butyricicoccus_sp.	0	0	0	0	0	0	0	0	0	0	0	0
d__Bacteria|p__Firmicutes|c__Clostridia|o__Clostridiales|f__Clostridiaceae|g__Butyricicoccus|s__uncultured_Butyricicoccus_sp.	0	0	0	0	0	0	0.00305	0	0	0	0	0
d__Bacteria|p__Firmicutes|c__Clostridia|o__Clostridiales|f__Clostridiaceae|g__Candidatus_Arthromitus	0.05356	0.15791	0.00823	1.00853	0.08517	0.25406	0.39173	0.29859	0.01372	0.46688	1.24673	0.37042
d__Bacteria|p__Firmicutes|c__Clostridia|o__Clostridiales|f__Clostridiaceae|g__Candidatus_Arthromitus|s__Candidatus_Arthromitus_sp._SFB-mouse	0.05356	0.15791	0.00823	1.00853	0.08517	0.24045	0.36887	0.29859	0.01372	0.46688	1.24365	0.37042
d__Bacteria|p__Firmicutes|c__Clostridia|o__Clostridiales|f__Clostridiaceae|g__Candidatus_Arthromitus|s__Candidatus_Arthromitus_unclassified	0	0	0	0	0	0.01361	0.02286	0	0	0	0.00308	0
d__Bacteria|p__Firmicutes|c__Clostridia|o__Clostridiales|f__Clostridiaceae|g__Clostridiaceae_unclassified	0.0029	0	0	0	0	0	0	0	0	0	0	0
d__Bacteria|p__Firmicutes|c__Clostridia|o__Clostridiales|f__Clostridiaceae|g__Clostridiaceae_unclassified|s__Clostridiaceae_unclassified	0.0029	0	0	0	0	0	0	0	0	0	0	0
d__Bacteria|p__Firmicutes|c__Clostridia|o__Clostridiales|f__Clostridiaceae|g__Clostridium	0.24029	0.26063	0.17411	0.6958	0.25407	0.14518	0.51825	0.30006	0.66619	0.67299	1.48376	0.6348
d__Bacteria|p__Firmicutes|c__Clostridia|o__Clostridiales|f__Clostridiaceae|g__Clostridium_sensu_stricto_1	0	0	0	0.00748	0.00577	0	0	0.01311	0	0.00781	0.0077	0.00615
d__Bacteria|p__Firmicutes|c__Clostridia|o__Clostridiales|f__Clostridiaceae|g__Clostridium_sensu_stricto_1|s__Clostridium_sensu_stricto_1_unclassified	0	0	0	0.00748	0.00577	0	0	0.01311	0	0.00781	0.0077	0.00615
d__Bacteria|p__Firmicutes|c__Clostridia|o__Clostridiales|f__Clostridiaceae|g__Clostridium|s__Clostridium_fusiformis	0	0	0.01782	0	0	0	0.02286	0	0	0	0	0
d__Bacteria|p__Firmicutes|c__Clostridia|o__Clostridiales|f__Clostridiaceae|g__Clostridium|s__Clostridium_sp._A9	0	0.0138	0	0	0	0	0	0	0	0.01249	0.06772	0.01691
d__Bacteria|p__Firmicutes|c__Clostridia|o__Clostridiales|f__Clostridiaceae|g__Clostridium|s__Clostridium_sp._AT4	0	0	0	0	0	0	0	0	0	0	0	0
d__Bacteria|p__Firmicutes|c__Clostridia|o__Clostridiales|f__Clostridiaceae|g__Clostridium|s__Clostridium_sp._Clone-1	0	0.06439	0	0.03442	0	0	0.06859	0.01748	0	0	0.07388	0
d__Bacteria|p__Firmicutes|c__Clostridia|o__Clostridiales|f__Clostridiaceae|g__Clostridium|s__Clostridium_sp._Clone-17	0	0.06132	0.0425	0.15861	0	0	0.05487	0.11944	0.09604	0.37944	0.2201	0.08454
d__Bacteria|p__Firmicutes|c__Clostridia|o__Clostridiales|f__Clostridiaceae|g__Clostridium|s__Clostridium_sp._Clone-24	0	0	0	0.06584	0.02021	0	0.02439	0.0102	0	0	0.09543	0.06455
d__Bacteria|p__Firmicutes|c__Clostridia|o__Clostridiales|f__Clostridiaceae|g__Clostridium|s__Clostridium_sp._Clone-40	0	0	0	0	0	0	0	0	0	0	0	0
d__Bacteria|p__Firmicutes|c__Clostridia|o__Clostridiales|f__Clostridiaceae|g__Clostridium|s__Clostridium_sp._Clone-49	0.01737	0.02913	0.01508	0	0.01444	0	0.01372	0	0	0	0.06157	0
d__Bacteria|p__Firmicutes|c__Clostridia|o__Clostridiales|f__Clostridiaceae|g__Clostridium|s__Clostridium_sp._Clone-7	0.04632	0	0.01371	0.11971	0	0.02571	0.03353	0	0.02592	0	0.29552	0.0538
d__Bacteria|p__Firmicutes|c__Clostridia|o__Clostridiales|f__Clostridiaceae|g__Clostridium|s__Clostridium_sp._Culture-1	0.04487	0.04906	0.06717	0.04639	0.06929	0.05898	0.09908	0	0.17074	0.18113	0.25858	0.04611
d__Bacteria|p__Firmicutes|c__Clostridia|o__Clostridiales|f__Clostridiaceae|g__Clostridium|s__Clostridium_sp._Culture-41	0.09264	0.04293	0.0096	0.08978	0.13425	0.03327	0.12804	0.13546	0.32776	0.09993	0.1416	0.35659
d__Bacteria|p__Firmicutes|c__Clostridia|o__Clostridiales|f__Clostridiaceae|g__Clostridium|s__Clostridium_sp._Marseille-P3122	0.01303	0	0	0.01496	0	0	0.03506	0	0.02744	0	0.13237	0
d__Bacteria|p__Firmicutes|c__Clostridia|o__Clostridiales|f__Clostridiaceae|g__Clostridium|s__uncultured_Clostridium_sp.	0.02606	0	0.00823	0.16609	0.01588	0.02722	0.03811	0.01748	0.01829	0	0.13699	0.0123
d__Bacteria|p__Firmicutes|c__Clostridia|o__Clostridiales|f__Clostridiaceae|g__Proteiniclasticum	0	0	0	0	0	0	0	0	0	0	0	0
d__Bacteria|p__Firmicutes|c__Clostridia|o__Clostridiales|f__Clostridiaceae|g__Proteiniclasticum|s__uncultured_Proteiniclasticum_sp.	0	0	0	0	0	0	0	0	0	0	0	0
d__Bacteria|p__Firmicutes|c__Clostridia|o__Clostridiales|f__Clostridiales_Family_IV._Incertae_Sedis	0	0	0	0	0	0	0	0	0	0	0.00308	0
d__Bacteria|p__Firmicutes|c__Clostridia|o__Clostridiales|f__Clostridiales_Family_IV._Incertae_Sedis|g__Clostridiales_Family_IV._Incertae_Sedis_unclassified	0	0	0	0	0	0	0	0	0	0	0.00308	0
d__Bacteria|p__Firmicutes|c__Clostridia|o__Clostridiales|f__Clostridiales_Family_IV._Incertae_Sedis|g__Clostridiales_Family_IV._Incertae_Sedis_unclassified|s__Clostridiales_Family_IV._Incertae_Sedis_unclassified	0	0	0	0	0	0	0	0	0	0	0.00308	0
d__Bacteria|p__Firmicutes|c__Clostridia|o__Clostridiales|f__Clostridiales_Family_XII._Incertae_Sedis	0	0	0	0	0	0	0	0	0	0	0.00616	0
d__Bacteria|p__Firmicutes|c__Clostridia|o__Clostridiales|f__Clostridiales_Family_XII._Incertae_Sedis|g__Acidaminobacter	0	0	0	0	0	0	0	0	0	0	0.00616	0
d__Bacteria|p__Firmicutes|c__Clostridia|o__Clostridiales|f__Clostridiales_Family_XII._Incertae_Sedis|g__Acidaminobacter|s__uncultured_Acidaminobacter_sp.	0	0	0	0	0	0	0	0	0	0	0.00616	0
d__Bacteria|p__Firmicutes|c__Clostridia|o__Clostridiales|f__Clostridiales_Family_XIII._Incertae_Sedis	0	0.0046	0	0.00299	0	0.00605	0	0	0.02134	0	0.00462	0.00769
d__Bacteria|p__Firmicutes|c__Clostridia|o__Clostridiales|f__Clostridiales_Family_XIII._Incertae_Sedis|g__Anaerovorax	0	0.0046	0	0.00299	0	0.00605	0	0	0	0	0.00462	0
d__Bacteria|p__Firmicutes|c__Clostridia|o__Clostridiales|f__Clostridiales_Family_XIII._Incertae_Sedis|g__Anaerovorax|s__uncultured_Anaerovorax_sp.	0	0.0046	0	0.00299	0	0.00605	0	0	0	0	0.00462	0
d__Bacteria|p__Firmicutes|c__Clostridia|o__Clostridiales|f__Clostridiales_Family_XIII._Incertae_Sedis|g__Clostridiales_Family_XIII._Incertae_Sedis_unclassified	0	0	0	0	0	0	0	0	0.02134	0	0	0.00769
d__Bacteria|p__Firmicutes|c__Clostridia|o__Clostridiales|f__Clostridiales_Family_XIII._Incertae_Sedis|g__Clostridiales_Family_XIII._Incertae_Sedis_unclassified|s__Clostridiales_Family_XIII._Incertae_Sedis_unclassified	0	0	0	0	0	0	0	0	0.02134	0	0	0.00769
d__Bacteria|p__Firmicutes|c__Clostridia|o__Clostridiales|f__Clostridiales_Family_XIV._Incertae_Sedis	0.01737	0	0	0.02095	0	0.00454	0.03506	0.01311	0.00305	0	0.08927	0.00615
d__Bacteria|p__Firmicutes|c__Clostridia|o__Clostridiales|f__Clostridiales_Family_XIV._Incertae_Sedis|g__Clostridiales_Family_XIV._Incertae_Sedis_unclassified	0.01737	0	0	0.02095	0	0.00454	0.03506	0.01311	0.00305	0	0.08927	0.00615
d__Bacteria|p__Firmicutes|c__Clostridia|o__Clostridiales|f__Clostridiales_Family_XIV._Incertae_Sedis|g__Clostridiales_Family_XIV._Incertae_Sedis_unclassified|s__Clostridiales_Family_XIV._Incertae_Sedis_unclassified	0.01737	0	0	0.02095	0	0.00454	0.03506	0.01311	0.00305	0	0.08927	0.00615
d__Bacteria|p__Firmicutes|c__Clostridia|o__Clostridiales|f__Clostridiales_unclassified	3.49435	0.70062	0.39617	6.48511	2.88412	2.68272	5.13985	1.33127	1.52751	2.84813	11.1821	2.42234
d__Bacteria|p__Firmicutes|c__Clostridia|o__Clostridiales|f__Clostridiales_unclassified|g__Clostridiales_unclassified	3.49435	0.70062	0.39617	6.48511	2.88412	2.68272	5.13985	1.33127	1.52751	2.84813	11.1821	2.42234
d__Bacteria|p__Firmicutes|c__Clostridia|o__Clostridiales|f__Clostridiales_unclassified|g__Clostridiales_unclassified|s__Clostridiales_unclassified	3.49435	0.70062	0.39617	6.48511	2.88412	2.68272	5.13985	1.33127	1.52751	2.84813	11.1821	2.42234
d__Bacteria|p__Firmicutes|c__Clostridia|o__Clostridiales|f__Eubacteriaceae	0.04487	0	0	0.00449	0	0.00605	0.01219	0.00874	0.00762	0	0.01539	0.02306
d__Bacteria|p__Firmicutes|c__Clostridia|o__Clostridiales|f__Eubacteriaceae|g__Eubacterium	0.04487	0	0	0.00449	0	0.00605	0.01219	0.00874	0.00762	0	0.01539	0.02306
d__Bacteria|p__Firmicutes|c__Clostridia|o__Clostridiales|f__Eubacteriaceae|g__Eubacterium|s__Eubacterium_plexicaudatum	0.02316	0	0	0.00449	0	0.00605	0.01219	0.00874	0	0	0.01539	0.0123
d__Bacteria|p__Firmicutes|c__Clostridia|o__Clostridiales|f__Eubacteriaceae|g__Eubacterium|s__Eubacterium_ramulus	0	0	0	0	0	0	0	0	0.00762	0	0	0
d__Bacteria|p__Firmicutes|c__Clostridia|o__Clostridiales|f__Eubacteriaceae|g__Eubacterium|s__uncultured_Eubacterium_sp.	0.02171	0	0	0	0	0	0	0	0	0	0	0.01076
d__Bacteria|p__Firmicutes|c__Clostridia|o__Clostridiales|f__Lachnospiraceae	2.96021	0.97811	0.60455	5.60527	3.30705	3.16814	4.14296	1.36479	5.16793	3.90681	7.29569	4.48346
d__Bacteria|p__Firmicutes|c__Clostridia|o__Clostridiales|f__Lachnospiraceae|g__Acetatifactor	0.23595	0.06439	0.01645	0.06734	0.09238	0.03629	0.05335	0.01457	0.06708	0.089	0.10312	0.0415
d__Bacteria|p__Firmicutes|c__Clostridia|o__Clostridiales|f__Lachnospiraceae|g__Acetatifactor|s__Acetatifactor_sp.	0.23595	0.06439	0.01645	0.06734	0.09238	0.03629	0.05335	0.01457	0.06708	0.089	0.10312	0.0415
d__Bacteria|p__Firmicutes|c__Clostridia|o__Clostridiales|f__Lachnospiraceae|g__Anaerobium	0	0	0	0	0.00289	0	0	0	0	0	0	0
d__Bacteria|p__Firmicutes|c__Clostridia|o__Clostridiales|f__Lachnospiraceae|g__Anaerobium|s__Anaerobium_sp.	0	0	0	0	0.00289	0	0	0	0	0	0	0
d__Bacteria|p__Firmicutes|c__Clostridia|o__Clostridiales|f__Lachnospiraceae|g__Anaerostipes	0	0	0.01919	0	0	0	0.04573	0	0	0.00781	0.04771	0
d__Bacteria|p__Firmicutes|c__Clostridia|o__Clostridiales|f__Lachnospiraceae|g__Anaerostipes|s__Anaerostipes_sp.	0	0	0.01919	0	0	0	0.04573	0	0	0.00781	0.04771	0
d__Bacteria|p__Firmicutes|c__Clostridia|o__Clostridiales|f__Lachnospiraceae|g__Anaerostipes|s__Anaerostipes_sp._IE4	0	0	0	0	0	0	0	0	0	0	0	0
d__Bacteria|p__Firmicutes|c__Clostridia|o__Clostridiales|f__Lachnospiraceae|g__Anaerotignum	0.262	0.13031	0.02879	0.27682	0.07939	0.12703	0.22559	0.23159	0.1494	0.13429	0.39557	0.76082
d__Bacteria|p__Firmicutes|c__Clostridia|o__Clostridiales|f__Lachnospiraceae|g__Anaerotignum|s__Anaerotignum_sp.	0.262	0.13031	0.02879	0.27682	0.07939	0.12703	0.22559	0.23159	0.1494	0.13429	0.39557	0.76082
d__Bacteria|p__Firmicutes|c__Clostridia|o__Clostridiales|f__Lachnospiraceae|g__Blautia	0	0	0	0	0	0	0	0	0	0	0	0
d__Bacteria|p__Firmicutes|c__Clostridia|o__Clostridiales|f__Lachnospiraceae|g__Blautia|s__uncultured_Blautia_sp.	0	0	0	0	0	0	0	0	0	0	0	0
d__Bacteria|p__Firmicutes|c__Clostridia|o__Clostridiales|f__Lachnospiraceae|g__Coprococcus	0.0608	0	0	0	0	0.00605	0.10974	0	0	0	0.14315	0.00307
d__Bacteria|p__Firmicutes|c__Clostridia|o__Clostridiales|f__Lachnospiraceae|g__Coprococcus|s__Coprococcus_sp.	0.0608	0	0	0	0	0	0.0945	0	0	0	0.08158	0
d__Bacteria|p__Firmicutes|c__Clostridia|o__Clostridiales|f__Lachnospiraceae|g__Coprococcus|s__uncultured_Coprococcus_sp.	0	0	0	0	0	0.00605	0.01524	0	0	0	0.06157	0.00307
d__Bacteria|p__Firmicutes|c__Clostridia|o__Clostridiales|f__Lachnospiraceae|g__Dorea	0	0	0	0	0	0	0	0	0.0061	0	0	0
d__Bacteria|p__Firmicutes|c__Clostridia|o__Clostridiales|f__Lachnospiraceae|g__Dorea|s__uncultured_Dorea_sp.	0	0	0	0	0	0	0	0	0.0061	0	0	0
d__Bacteria|p__Firmicutes|c__Clostridia|o__Clostridiales|f__Lachnospiraceae|g__Eisenbergiella	0.13896	0.02453	0.01508	0.77061	0.01877	0.0121	0.15852	0.00874	0.58539	0.03123	0.95429	0.05533
d__Bacteria|p__Firmicutes|c__Clostridia|o__Clostridiales|f__Lachnospiraceae|g__Eisenbergiella|s__Eisenbergiella_sp.	0.13896	0.02453	0.01508	0.77061	0.01877	0.0121	0.15852	0.00874	0.58539	0.03123	0.95429	0.05533
d__Bacteria|p__Firmicutes|c__Clostridia|o__Clostridiales|f__Lachnospiraceae|g__Hespellia	0	0	0	0	0	0	0	0	0	0	0	0
d__Bacteria|p__Firmicutes|c__Clostridia|o__Clostridiales|f__Lachnospiraceae|g__Hespellia|s__uncultured_Hespellia_sp.	0	0	0	0	0	0	0	0	0	0	0	0
d__Bacteria|p__Firmicutes|c__Clostridia|o__Clostridiales|f__Lachnospiraceae|g__Kineothrix	0.66587	0.23763	0.04661	0.14066	0.58029	0.63514	0.69354	0.11361	0.3491	0.82134	0.1216	0.21364
d__Bacteria|p__Firmicutes|c__Clostridia|o__Clostridiales|f__Lachnospiraceae|g__Kineothrix|s__Kineothrix_alysoides	0	0.04293	0.04661	0.05387	0.55575	0.63514	0.55636	0.08157	0.32928	0.74014	0.02463	0.03535
d__Bacteria|p__Firmicutes|c__Clostridia|o__Clostridiales|f__Lachnospiraceae|g__Kineothrix|s__Kineothrix_sp.	0.66587	0.1947	0	0.08679	0.02454	0	0.13718	0.03204	0.01982	0.0812	0.09697	0.17829
d__Bacteria|p__Firmicutes|c__Clostridia|o__Clostridiales|f__Lachnospiraceae|g__Lachnoclostridium	0.10422	0.0276	0.01508	0.6943	0.66545	0.97237	0.49539	0.12818	0.04421	0.14522	0.84962	0.09683
d__Bacteria|p__Firmicutes|c__Clostridia|o__Clostridiales|f__Lachnospiraceae|g__Lachnoclostridium|s__Lachnoclostridium_sp.	0.10422	0.0276	0.01508	0.6943	0.66545	0.97237	0.49539	0.12818	0.04421	0.14522	0.84962	0.09683
d__Bacteria|p__Firmicutes|c__Clostridia|o__Clostridiales|f__Lachnospiraceae|g__Lachnospira	0.15489	0	0.01371	0	0	0	0.17072	0.01457	0.01677	0.06402	0.07234	0.08915
d__Bacteria|p__Firmicutes|c__Clostridia|o__Clostridiales|f__Lachnospiraceae|g__Lachnospiraceae_unclassified	1.0292	0.36181	0.39206	1.90633	0.84012	0.7909	1.727	0.59864	3.6831	2.53271	3.29691	3.1432
d__Bacteria|p__Firmicutes|c__Clostridia|o__Clostridiales|f__Lachnospiraceae|g__Lachnospiraceae_unclassified|s__Lachnospiraceae_unclassified	1.0292	0.36181	0.39206	1.90633	0.84012	0.7909	1.727	0.59864	3.6831	2.53271	3.29691	3.1432
d__Bacteria|p__Firmicutes|c__Clostridia|o__Clostridiales|f__Lachnospiraceae|g__Lachnospira|s__uncultured_Lachnospira_sp.	0.15489	0	0.01371	0	0	0	0.17072	0.01457	0.01677	0.06402	0.07234	0.08915
d__Bacteria|p__Firmicutes|c__Clostridia|o__Clostridiales|f__Lachnospiraceae|g__Mediterraneibacter	0	0.00613	0	0.01796	0.02887	0.02268	0	0	0.01982	0.00781	0.02617	0
d__Bacteria|p__Firmicutes|c__Clostridia|o__Clostridiales|f__Lachnospiraceae|g__Mediterraneibacter|s__Mediterraneibacter_sp._KCTC_15684	0	0.00613	0	0.01796	0.02887	0.02268	0	0	0.01982	0.00781	0.02617	0
d__Bacteria|p__Firmicutes|c__Clostridia|o__Clostridiales|f__Lachnospiraceae|g__Murimonas	0.01013	0	0	0	0	0	0.03201	0	0	0	0.01847	0.00922
d__Bacteria|p__Firmicutes|c__Clostridia|o__Clostridiales|f__Lachnospiraceae|g__Murimonas|s__Murimonas_sp.	0.01013	0	0	0	0	0	0.03201	0	0	0	0.01847	0.00922
d__Bacteria|p__Firmicutes|c__Clostridia|o__Clostridiales|f__Lachnospiraceae|g__Robinsoniella	0	0.01226	0.01097	0.04189	0.65679	0.28279	0.02591	0	0.0122	0.01249	0.07542	0.0292
d__Bacteria|p__Firmicutes|c__Clostridia|o__Clostridiales|f__Lachnospiraceae|g__Robinsoniella|s__Robinsoniella_peoriensis	0	0	0	0	0	0	0	0	0	0	0	0
d__Bacteria|p__Firmicutes|c__Clostridia|o__Clostridiales|f__Lachnospiraceae|g__Robinsoniella|s__Robinsoniella_sp.	0	0.01226	0.01097	0.0389	0.65679	0.28279	0	0	0.0122	0.01249	0.00308	0.0292
d__Bacteria|p__Firmicutes|c__Clostridia|o__Clostridiales|f__Lachnospiraceae|g__Robinsoniella|s__uncultured_Robinsoniella_sp.	0	0	0	0.00299	0	0	0.02591	0	0	0	0.07234	0
d__Bacteria|p__Firmicutes|c__Clostridia|o__Clostridiales|f__Lachnospiraceae|g__Roseburia	0.25042	0.0276	0.0096	1.21353	0.24972	0.24196	0.29266	0.05243	0.22409	0.00468	0.7388	0.01998
d__Bacteria|p__Firmicutes|c__Clostridia|o__Clostridiales|f__Lachnospiraceae|g__Roseburia|s__Roseburia_sp.	0.24463	0.0276	0.0096	0.05088	0.24395	0.24196	0.17986	0.02039	0.21647	0.00468	0.15238	0.01076
d__Bacteria|p__Firmicutes|c__Clostridia|o__Clostridiales|f__Lachnospiraceae|g__Roseburia|s__Roseburia_sp._831b	0	0	0	0	0	0	0	0	0	0	0.03078	0
d__Bacteria|p__Firmicutes|c__Clostridia|o__Clostridiales|f__Lachnospiraceae|g__Roseburia|s__uncultured_Roseburia_sp.	0.00579	0	0	1.16265	0.00577	0	0.1128	0.03204	0.00762	0	0.55564	0.00922
d__Bacteria|p__Firmicutes|c__Clostridia|o__Clostridiales|f__Lachnospiraceae|g__Tyzzerella	0.04777	0.08585	0.03701	0.47583	0.09238	0.04083	0.1128	0.20246	0.01067	0.05621	0.45252	0.02152
d__Bacteria|p__Firmicutes|c__Clostridia|o__Clostridiales|f__Lachnospiraceae|g__Tyzzerella|s__Tyzzerella_sp.	0.04777	0.08585	0.03701	0.47583	0.09238	0.04083	0.1128	0.20246	0.01067	0.05621	0.45252	0.02152
d__Bacteria|p__Firmicutes|c__Clostridia|o__Clostridiales|f__Oscillospiraceae	0.05791	0.00307	0.00548	0.15113	0.04908	0.09981	0.13261	0.13109	0.03659	0.01874	0.10621	0
d__Bacteria|p__Firmicutes|c__Clostridia|o__Clostridiales|f__Oscillospiraceae|g__Oscillibacter	0.05791	0.00307	0.00548	0.15113	0.04908	0.09981	0.13261	0.13109	0.03659	0.01874	0.10621	0
d__Bacteria|p__Firmicutes|c__Clostridia|o__Clostridiales|f__Oscillospiraceae|g__Oscillibacter|s__Oscillibacter_sp.	0.02606	0	0.00548	0.08679	0.02165	0.06049	0.1006	0.13109	0.03659	0.01874	0.06157	0
d__Bacteria|p__Firmicutes|c__Clostridia|o__Clostridiales|f__Oscillospiraceae|g__Oscillibacter|s__uncultured_Oscillibacter_sp.	0.03185	0.00307	0	0.06434	0.02743	0.03932	0.03201	0	0	0	0.04464	0
d__Bacteria|p__Firmicutes|c__Clostridia|o__Clostridiales|f__Ruminococcaceae	0.2345	0.05213	0.04661	1.11327	1.14038	0.81359	0.2073	0.3554	0.25763	0.51216	0.68802	0.2367
d__Bacteria|p__Firmicutes|c__Clostridia|o__Clostridiales|f__Ruminococcaceae|g__Acetivibrio	0	0	0	0.01945	0.00289	0	0.00305	0.00728	0	0	0.0077	0
d__Bacteria|p__Firmicutes|c__Clostridia|o__Clostridiales|f__Ruminococcaceae|g__Acetivibrio|s__Acetivibrio_sp.	0	0	0	0.01646	0	0	0.00305	0	0	0	0.00308	0
d__Bacteria|p__Firmicutes|c__Clostridia|o__Clostridiales|f__Ruminococcaceae|g__Acetivibrio|s__uncultured_Acetivibrio_sp.	0	0	0	0.00299	0.00289	0	0	0.00728	0	0	0.00462	0
d__Bacteria|p__Firmicutes|c__Clostridia|o__Clostridiales|f__Ruminococcaceae|g__Anaerotruncus	0	0	0	0	0.00433	0	0	0	0	0	0	0
d__Bacteria|p__Firmicutes|c__Clostridia|o__Clostridiales|f__Ruminococcaceae|g__Anaerotruncus|s__Anaerotruncus_sp.	0	0	0	0	0.00433	0	0	0	0	0	0	0
d__Bacteria|p__Firmicutes|c__Clostridia|o__Clostridiales|f__Ruminococcaceae|g__Anaerotruncus|s__uncultured_Anaerotruncus_sp.	0	0	0	0	0	0	0	0	0	0	0	0
d__Bacteria|p__Firmicutes|c__Clostridia|o__Clostridiales|f__Ruminococcaceae|g__Bittarella	0	0	0	0	0	0	0	0.00291	0	0	0	0
d__Bacteria|p__Firmicutes|c__Clostridia|o__Clostridiales|f__Ruminococcaceae|g__Bittarella|s__Bittarella_massiliensis	0	0	0	0	0	0	0	0.00291	0	0	0	0
d__Bacteria|p__Firmicutes|c__Clostridia|o__Clostridiales|f__Ruminococcaceae|g__Flavonifractor	0	0	0	0	0.01877	0.03629	0	0.01457	0.0061	0	0	0
d__Bacteria|p__Firmicutes|c__Clostridia|o__Clostridiales|f__Ruminococcaceae|g__Flavonifractor|s__Flavonifractor_sp.	0	0	0	0	0.01877	0.02268	0	0.01457	0.0061	0	0	0
d__Bacteria|p__Firmicutes|c__Clostridia|o__Clostridiales|f__Ruminococcaceae|g__Flavonifractor|s__uncultured_Flavonifractor_sp.	0	0	0	0	0	0.01361	0	0	0	0	0	0
d__Bacteria|p__Firmicutes|c__Clostridia|o__Clostridiales|f__Ruminococcaceae|g__Gorbachella	0	0	0	0	0.00289	0.00454	0	0	0	0	0	0
d__Bacteria|p__Firmicutes|c__Clostridia|o__Clostridiales|f__Ruminococcaceae|g__Gorbachella|s__Gorbachella_massiliensis	0	0	0	0	0.00289	0.00454	0	0	0	0	0	0
d__Bacteria|p__Firmicutes|c__Clostridia|o__Clostridiales|f__Ruminococcaceae|g__Harryflintia	0.00434	0	0	0	0	0	0	0	0	0	0	0
d__Bacteria|p__Firmicutes|c__Clostridia|o__Clostridiales|f__Ruminococcaceae|g__Harryflintia|s__Harryflintia_acetispora	0.00434	0	0	0	0	0	0	0	0	0	0	0
d__Bacteria|p__Firmicutes|c__Clostridia|o__Clostridiales|f__Ruminococcaceae|g__Hydrogenoanaerobacterium	0.00434	0	0	0	0	0	0	0	0.00457	0	0	0
d__Bacteria|p__Firmicutes|c__Clostridia|o__Clostridiales|f__Ruminococcaceae|g__Hydrogenoanaerobacterium|s__uncultured_Hydrogenoanaerobacterium_sp.	0.00434	0	0	0	0	0	0	0	0.00457	0	0	0
d__Bacteria|p__Firmicutes|c__Clostridia|o__Clostridiales|f__Ruminococcaceae|g__Neglecta	0	0	0	0	0	0	0	0	0	0	0	0
d__Bacteria|p__Firmicutes|c__Clostridia|o__Clostridiales|f__Ruminococcaceae|g__Neglecta|s__Neglecta_sp.	0	0	0	0	0	0	0	0	0	0	0	0
d__Bacteria|p__Firmicutes|c__Clostridia|o__Clostridiales|f__Ruminococcaceae|g__Oscillospira	0.00724	0	0	0.05686	0.02454	0.03176	0	0.01602	0.01067	0	0.03386	0.01844
d__Bacteria|p__Firmicutes|c__Clostridia|o__Clostridiales|f__Ruminococcaceae|g__Oscillospira|s__uncultured_Oscillospira_sp.	0.00724	0	0	0.05686	0.02454	0.03176	0	0.01602	0.01067	0	0.03386	0.01844
d__Bacteria|p__Firmicutes|c__Clostridia|o__Clostridiales|f__Ruminococcaceae|g__Pseudoflavonifractor	0.05211	0.0138	0.0096	0.01197	0.14146	0.06503	0	0.15294	0.03049	0.11086	0	0.04304
d__Bacteria|p__Firmicutes|c__Clostridia|o__Clostridiales|f__Ruminococcaceae|g__Pseudoflavonifractor|s__Pseudoflavonifractor_sp.	0.05211	0.0138	0.0096	0.01197	0.14146	0.06503	0	0.15294	0.03049	0.11086	0	0.04304
d__Bacteria|p__Firmicutes|c__Clostridia|o__Clostridiales|f__Ruminococcaceae|g__Pseudoflavonifractor|s__uncultured_Pseudoflavonifractor_sp.	0	0	0	0	0	0	0	0	0	0	0	0
d__Bacteria|p__Firmicutes|c__Clostridia|o__Clostridiales|f__Ruminococcaceae|g__Ruminococcaceae_unclassified	0.16068	0.01533	0.01919	0.91276	0.89353	0.51416	0.17834	0.16168	0.18598	0.4013	0.60336	0.1537
d__Bacteria|p__Firmicutes|c__Clostridia|o__Clostridiales|f__Ruminococcaceae|g__Ruminococcaceae_unclassified|s__Ruminococcaceae_unclassified	0.16068	0.01533	0.01919	0.91276	0.89353	0.51416	0.17834	0.16168	0.18598	0.4013	0.60336	0.1537
d__Bacteria|p__Firmicutes|c__Clostridia|o__Clostridiales|f__Ruminococcaceae|g__Ruminococcus	0.00579	0.023	0.01782	0.11223	0.05197	0.16181	0.02591	0	0.01982	0	0.0431	0.02152
d__Bacteria|p__Firmicutes|c__Clostridia|o__Clostridiales|f__Ruminococcaceae|g__Ruminococcus|s__Ruminococcus_sp.	0	0	0	0	0	0	0	0	0	0	0	0
d__Bacteria|p__Firmicutes|c__Clostridia|o__Clostridiales|f__Ruminococcaceae|g__Ruminococcus|s__uncultured_Ruminococcus_sp.	0.00579	0.023	0.01782	0.11223	0.05197	0.16181	0.02591	0	0.01982	0	0.0431	0.02152
d__Bacteria|p__Firmicutes|c__Clostridia|o__Eubacteriales	0	0	0.00685	0	0	0.00302	0	0	0	0.00781	0.00616	0
d__Bacteria|p__Firmicutes|c__Clostridia|o__Eubacteriales|f__Anaerofustaceae	0	0	0.00685	0	0	0.00302	0	0	0	0.00781	0.00616	0
d__Bacteria|p__Firmicutes|c__Clostridia|o__Eubacteriales|f__Anaerofustaceae|g__Anaerofustis	0	0	0.00685	0	0	0.00302	0	0	0	0.00781	0.00616	0
d__Bacteria|p__Firmicutes|c__Clostridia|o__Eubacteriales|f__Anaerofustaceae|g__Anaerofustis|s__Anaerofustis_unclassified	0	0	0.00685	0	0	0.00302	0	0	0	0.00781	0.00616	0
d__Bacteria|p__Firmicutes|c__Clostridia|o__Eubacteriales|f__Eubacteriaceae	0	0	0	0	0	0	0	0	0	0	0	0
d__Bacteria|p__Firmicutes|c__Clostridia|o__Eubacteriales|f__Eubacteriaceae|g__Eubacterium	0	0	0	0	0	0	0	0	0	0	0	0
d__Bacteria|p__Firmicutes|c__Clostridia|o__Eubacteriales|f__Eubacteriaceae|g__Eubacterium|s__Eubacterium_unclassified	0	0	0	0	0	0	0	0	0	0	0	0
d__Bacteria|p__Firmicutes|c__Clostridia|o__Lachnospirales	4.34117	2.33028	1.42432	12.6216	6.99377	6.63571	8.93223	3.56125	3.43918	7.74333	21.6238	4.98457
d__Bacteria|p__Firmicutes|c__Clostridia|o__Lachnospirales|f__Defluviitaleaceae	0	0.00613	0	0	0	0	0	0	0	0	0	0.00922
d__Bacteria|p__Firmicutes|c__Clostridia|o__Lachnospirales|f__Defluviitaleaceae|g__Defluviitaleaceae_UCG-011	0	0.00613	0	0	0	0	0	0	0	0	0	0.00922
d__Bacteria|p__Firmicutes|c__Clostridia|o__Lachnospirales|f__Defluviitaleaceae|g__Defluviitaleaceae_UCG-011|s__Defluviitaleaceae_UCG-011_unclassified	0	0.00613	0	0	0	0	0	0	0	0	0	0.00922
d__Bacteria|p__Firmicutes|c__Clostridia|o__Lachnospirales|f__Lachnospiraceae	4.34117	2.32415	1.42432	12.6216	6.99377	6.63571	8.93223	3.56125	3.43918	7.74333	21.6238	4.97535
d__Bacteria|p__Firmicutes|c__Clostridia|o__Lachnospirales|f__Lachnospiraceae|g__A2	0.04777	0	0	0.03292	0.05774	0.06956	0.24388	0	0.00762	0.33259	0.22472	0
d__Bacteria|p__Firmicutes|c__Clostridia|o__Lachnospirales|f__Lachnospiraceae|g__A2|s__A2_unclassified	0.04777	0	0	0.03292	0.05774	0.06956	0.24388	0	0.00762	0.33259	0.22472	0
d__Bacteria|p__Firmicutes|c__Clostridia|o__Lachnospirales|f__Lachnospiraceae|g__ASF356	0.04343	0	0	0.06883	0.00289	0	0.29571	0.01748	0.02439	0.01249	0.23241	0.00769
d__Bacteria|p__Firmicutes|c__Clostridia|o__Lachnospirales|f__Lachnospiraceae|g__ASF356|s__ASF356_unclassified	0.04343	0	0	0.06883	0.00289	0	0.29571	0.01748	0.02439	0.01249	0.23241	0.00769
d__Bacteria|p__Firmicutes|c__Clostridia|o__Lachnospirales|f__Lachnospiraceae|g__Acetatifactor	0.01882	0.0184	0	0.02843	0	0	0.06859	0.03787	0.13873	0.03591	0.1493	0
d__Bacteria|p__Firmicutes|c__Clostridia|o__Lachnospirales|f__Lachnospiraceae|g__Acetatifactor|s__Acetatifactor_unclassified	0.01882	0.0184	0	0.02843	0	0	0.06859	0.03787	0.13873	0.03591	0.1493	0
d__Bacteria|p__Firmicutes|c__Clostridia|o__Lachnospirales|f__Lachnospiraceae|g__Agathobacter	0	0	0.04113	0	0	0	0	0	0	0.02811	0.0354	0
d__Bacteria|p__Firmicutes|c__Clostridia|o__Lachnospirales|f__Lachnospiraceae|g__Agathobacter|s__Agathobacter_unclassified	0	0	0.04113	0	0	0	0	0	0	0.02811	0.0354	0
d__Bacteria|p__Firmicutes|c__Clostridia|o__Lachnospirales|f__Lachnospiraceae|g__Anaerostipes	0	0	0.00274	0.01197	0	0	0	0	0	0	0	0.0123
d__Bacteria|p__Firmicutes|c__Clostridia|o__Lachnospirales|f__Lachnospiraceae|g__Anaerostipes|s__Anaerostipes_unclassified	0	0	0.00274	0.01197	0	0	0	0	0	0	0	0.0123
d__Bacteria|p__Firmicutes|c__Clostridia|o__Lachnospirales|f__Lachnospiraceae|g__Blautia	0.01303	0	0	0.07631	0	0.00302	0.01372	0.01457	0.00305	0	0.0077	0.09683
d__Bacteria|p__Firmicutes|c__Clostridia|o__Lachnospirales|f__Lachnospiraceae|g__Blautia|s__Blautia_unclassified	0.01303	0	0	0.07631	0	0.00302	0.01372	0.01457	0.00305	0	0.0077	0.09683
d__Bacteria|p__Firmicutes|c__Clostridia|o__Lachnospirales|f__Lachnospiraceae|g__Coprococcus	0.01158	0	0	0	0	0	0	0	0.01067	0	0	0
d__Bacteria|p__Firmicutes|c__Clostridia|o__Lachnospirales|f__Lachnospiraceae|g__Coprococcus|s__Coprococcus_unclassified	0.01158	0	0	0	0	0	0	0	0.01067	0	0	0
d__Bacteria|p__Firmicutes|c__Clostridia|o__Lachnospirales|f__Lachnospiraceae|g__Dorea	0.1491	0.05672	0.02468	0.01047	0	0.00907	0	0.00728	0.58692	0.03123	0	0.19366
d__Bacteria|p__Firmicutes|c__Clostridia|o__Lachnospirales|f__Lachnospiraceae|g__Dorea|s__Dorea_unclassified	0.1491	0.05672	0.02468	0.01047	0	0.00907	0	0.00728	0.58692	0.03123	0	0.19366
d__Bacteria|p__Firmicutes|c__Clostridia|o__Lachnospirales|f__Lachnospiraceae|g__Eubacterium]_oxidoreducens_group	0	0	0	0	0	0.00454	0.00762	0	0	0	0.00308	0
d__Bacteria|p__Firmicutes|c__Clostridia|o__Lachnospirales|f__Lachnospiraceae|g__Eubacterium]_oxidoreducens_group|s__Eubacterium]_oxidoreducens_group_unclassified	0	0	0	0	0	0.00454	0.00762	0	0	0	0.00308	0
d__Bacteria|p__Firmicutes|c__Clostridia|o__Lachnospirales|f__Lachnospiraceae|g__Eubacterium]_ruminantium_group	0	0.01686	0.01645	0.02394	0	0	0.00457	0	0	0	0	0
d__Bacteria|p__Firmicutes|c__Clostridia|o__Lachnospirales|f__Lachnospiraceae|g__Eubacterium]_ruminantium_group|s__Eubacterium]_ruminantium_group_unclassified	0	0.01686	0.01645	0.02394	0	0	0.00457	0	0	0	0	0
d__Bacteria|p__Firmicutes|c__Clostridia|o__Lachnospirales|f__Lachnospiraceae|g__Eubacterium]_ventriosum_group	0	0.00613	0.00823	0.01047	0.0101	0.01059	0.08231	0.01602	0	0	0.11698	0.04918
d__Bacteria|p__Firmicutes|c__Clostridia|o__Lachnospirales|f__Lachnospiraceae|g__Eubacterium]_ventriosum_group|s__Eubacterium]_ventriosum_group_unclassified	0	0.00613	0.00823	0.01047	0.0101	0.01059	0.08231	0.01602	0	0	0.11698	0.04918
d__Bacteria|p__Firmicutes|c__Clostridia|o__Lachnospirales|f__Lachnospiraceae|g__Eubacterium]_xylanophilum_group	0.49361	0.08279	0.01234	0.40551	0.51822	0.20415	0.11127	0.78799	0.03964	0.77605	0.32784	0.11835
d__Bacteria|p__Firmicutes|c__Clostridia|o__Lachnospirales|f__Lachnospiraceae|g__Eubacterium]_xylanophilum_group|s__Eubacterium]_xylanophilum_group_unclassified	0.49361	0.08279	0.01234	0.40551	0.51822	0.20415	0.11127	0.78799	0.03964	0.77605	0.32784	0.11835
d__Bacteria|p__Firmicutes|c__Clostridia|o__Lachnospirales|f__Lachnospiraceae|g__Frisingicoccus	0	0	0	0	0	0	0	0	0	0	0	0
d__Bacteria|p__Firmicutes|c__Clostridia|o__Lachnospirales|f__Lachnospiraceae|g__Frisingicoccus|s__Frisingicoccus_unclassified	0	0	0	0	0	0	0	0	0	0	0	0
d__Bacteria|p__Firmicutes|c__Clostridia|o__Lachnospirales|f__Lachnospiraceae|g__Fusicatenibacter	0	0	0	0.01796	0	0	0.00915	0	0	0.00468	0	0.00615
d__Bacteria|p__Firmicutes|c__Clostridia|o__Lachnospirales|f__Lachnospiraceae|g__Fusicatenibacter|s__Fusicatenibacter_unclassified	0	0	0	0.01796	0	0	0.00915	0	0	0.00468	0	0.00615
d__Bacteria|p__Firmicutes|c__Clostridia|o__Lachnospirales|f__Lachnospiraceae|g__GCA-900066575	0.05935	0.02913	0.04798	0.34416	0.04475	0.03327	0.11584	0.19955	0.15245	0.0203	0.39557	0.06609
d__Bacteria|p__Firmicutes|c__Clostridia|o__Lachnospirales|f__Lachnospiraceae|g__GCA-900066575|s__GCA-900066575_unclassified	0.05935	0.02913	0.04798	0.34416	0.04475	0.03327	0.11584	0.19955	0.15245	0.0203	0.39557	0.06609
d__Bacteria|p__Firmicutes|c__Clostridia|o__Lachnospirales|f__Lachnospiraceae|g__Johnsonella	0	0.05979	0.06443	0.05836	0.08084	0.03478	0.04268	0.04952	0.0686	0.05153	0.06618	0.08146
d__Bacteria|p__Firmicutes|c__Clostridia|o__Lachnospirales|f__Lachnospiraceae|g__Johnsonella|s__Johnsonella_unclassified	0	0.05979	0.06443	0.05836	0.08084	0.03478	0.04268	0.04952	0.0686	0.05153	0.06618	0.08146
d__Bacteria|p__Firmicutes|c__Clostridia|o__Lachnospirales|f__Lachnospiraceae|g__Lachnoclostridium	0	0	0	0	0	0	0	0.01311	0	0	0	0
d__Bacteria|p__Firmicutes|c__Clostridia|o__Lachnospirales|f__Lachnospiraceae|g__Lachnoclostridium|s__Lachnoclostridium_unclassified	0	0	0	0	0	0	0	0.01311	0	0	0	0
d__Bacteria|p__Firmicutes|c__Clostridia|o__Lachnospirales|f__Lachnospiraceae|g__Lachnospira	0	0	0	0	0	0	0	0	0	0	0	0.00769
d__Bacteria|p__Firmicutes|c__Clostridia|o__Lachnospirales|f__Lachnospiraceae|g__Lachnospiraceae_FCS020_group	0.09119	0.0046	0.00548	0.00748	0.01444	0.0741	0.08993	0.00437	0.07317	0.00468	0.27089	0.0123
d__Bacteria|p__Firmicutes|c__Clostridia|o__Lachnospirales|f__Lachnospiraceae|g__Lachnospiraceae_FCS020_group|s__Lachnospiraceae_FCS020_group_unclassified	0.09119	0.0046	0.00548	0.00748	0.01444	0.0741	0.08993	0.00437	0.07317	0.00468	0.27089	0.0123
d__Bacteria|p__Firmicutes|c__Clostridia|o__Lachnospirales|f__Lachnospiraceae|g__Lachnospiraceae_NC2004_group	0	0	0	0	0	0.00605	0	0	0	0	0	0.00307
d__Bacteria|p__Firmicutes|c__Clostridia|o__Lachnospirales|f__Lachnospiraceae|g__Lachnospiraceae_NC2004_group|s__Lachnospiraceae_NC2004_group_unclassified	0	0	0	0	0	0.00605	0	0	0	0	0	0.00307
d__Bacteria|p__Firmicutes|c__Clostridia|o__Lachnospirales|f__Lachnospiraceae|g__Lachnospiraceae_ND3007_group	0	0	0	0.00449	0	0	0	0	0	0	0	0
d__Bacteria|p__Firmicutes|c__Clostridia|o__Lachnospirales|f__Lachnospiraceae|g__Lachnospiraceae_ND3007_group|s__Lachnospiraceae_ND3007_group_unclassified	0	0	0	0.00449	0	0	0	0	0	0	0	0
d__Bacteria|p__Firmicutes|c__Clostridia|o__Lachnospirales|f__Lachnospiraceae|g__Lachnospiraceae_NK3A20_group	0.02027	0	0	0	0	0	0	0	0	0	0	0
d__Bacteria|p__Firmicutes|c__Clostridia|o__Lachnospirales|f__Lachnospiraceae|g__Lachnospiraceae_NK3A20_group|s__Lachnospiraceae_NK3A20_group_unclassified	0.02027	0	0	0	0	0	0	0	0	0	0	0
d__Bacteria|p__Firmicutes|c__Clostridia|o__Lachnospirales|f__Lachnospiraceae|g__Lachnospiraceae_NK4A136_group	2.74887	1.80597	1.12272	10.6464	5.9963	6.07921	6.62907	1.87165	1.98637	4.99828	17.054	4.07003
d__Bacteria|p__Firmicutes|c__Clostridia|o__Lachnospirales|f__Lachnospiraceae|g__Lachnospiraceae_NK4A136_group|s__Lachnospiraceae_NK4A136_group_unclassified	2.74887	1.80597	1.12272	10.6464	5.9963	6.07921	6.62907	1.87165	1.98637	4.99828	17.054	4.07003
d__Bacteria|p__Firmicutes|c__Clostridia|o__Lachnospirales|f__Lachnospiraceae|g__Lachnospiraceae_NK4B4_group	0	0	0	0	0	0	0	0	0	0	0	0
d__Bacteria|p__Firmicutes|c__Clostridia|o__Lachnospirales|f__Lachnospiraceae|g__Lachnospiraceae_NK4B4_group|s__Lachnospiraceae_NK4B4_group_unclassified	0	0	0	0	0	0	0	0	0	0	0	0
d__Bacteria|p__Firmicutes|c__Clostridia|o__Lachnospirales|f__Lachnospiraceae|g__Lachnospiraceae_UCG-001	0.33872	0	0	0.08679	0.02165	0.01966	0.52892	0.13837	0.01067	0.05621	0.66338	0.00922
d__Bacteria|p__Firmicutes|c__Clostridia|o__Lachnospirales|f__Lachnospiraceae|g__Lachnospiraceae_UCG-001|s__Lachnospiraceae_UCG-001_unclassified	0.33872	0	0	0.08679	0.02165	0.01966	0.52892	0.13837	0.01067	0.05621	0.66338	0.00922
d__Bacteria|p__Firmicutes|c__Clostridia|o__Lachnospirales|f__Lachnospiraceae|g__Lachnospiraceae_UCG-006	0.05356	0.03526	0.0425	0.02993	0.10249	0.07108	0.14633	0.03059	0.14787	0.72452	0.07542	0.0538
d__Bacteria|p__Firmicutes|c__Clostridia|o__Lachnospirales|f__Lachnospiraceae|g__Lachnospiraceae_UCG-006|s__Lachnospiraceae_UCG-006_unclassified	0.05356	0.03526	0.0425	0.02993	0.10249	0.07108	0.14633	0.03059	0.14787	0.72452	0.07542	0.0538
d__Bacteria|p__Firmicutes|c__Clostridia|o__Lachnospirales|f__Lachnospiraceae|g__Lachnospiraceae_UCG-010	0	0	0	0	0	0	0.00457	0	0	0	0	0
d__Bacteria|p__Firmicutes|c__Clostridia|o__Lachnospirales|f__Lachnospiraceae|g__Lachnospiraceae_UCG-010|s__Lachnospiraceae_UCG-010_unclassified	0	0	0	0	0	0	0.00457	0	0	0	0	0
d__Bacteria|p__Firmicutes|c__Clostridia|o__Lachnospirales|f__Lachnospiraceae|g__Lachnospiraceae_unclassified	0.07382	0.16097	0.01782	0.5716	0.02165	0	0.48015	0.24324	0.10061	0.64333	1.73773	0.0415
d__Bacteria|p__Firmicutes|c__Clostridia|o__Lachnospirales|f__Lachnospiraceae|g__Lachnospiraceae_unclassified|s__Lachnospiraceae_unclassified	0.07382	0.16097	0.01782	0.5716	0.02165	0	0.48015	0.24324	0.10061	0.64333	1.73773	0.0415
d__Bacteria|p__Firmicutes|c__Clostridia|o__Lachnospirales|f__Lachnospiraceae|g__Lachnospira|s__Lachnospira_unclassified	0	0	0	0	0	0	0	0	0	0	0	0.00769
d__Bacteria|p__Firmicutes|c__Clostridia|o__Lachnospirales|f__Lachnospiraceae|g__Marvinbryantia	0	0.04753	0.01508	0	0	0	0.00762	0	0.07622	0.02342	0.01693	0.0123
d__Bacteria|p__Firmicutes|c__Clostridia|o__Lachnospirales|f__Lachnospiraceae|g__Marvinbryantia|s__Marvinbryantia_unclassified	0	0.04753	0.01508	0	0	0	0.00762	0	0.07622	0.02342	0.01693	0.0123
d__Bacteria|p__Firmicutes|c__Clostridia|o__Lachnospirales|f__Lachnospiraceae|g__Roseburia	0.08975	0	0	0.04639	0.01877	0	0	0	0	0	0.01693	0.04304
d__Bacteria|p__Firmicutes|c__Clostridia|o__Lachnospirales|f__Lachnospiraceae|g__Roseburia|s__Roseburia_unclassified	0.08975	0	0	0.04639	0.01877	0	0	0	0	0	0.01693	0.04304
d__Bacteria|p__Firmicutes|c__Clostridia|o__Lachnospirales|f__Lachnospiraceae|g__Ruminococcus]_gnavus_group	0	0	0	0.11821	0.0664	0	0	0.0772	0	0	0	0.07378
d__Bacteria|p__Firmicutes|c__Clostridia|o__Lachnospirales|f__Lachnospiraceae|g__Ruminococcus]_gnavus_group|s__Ruminococcus]_gnavus_group_unclassified	0	0	0	0.11821	0.0664	0	0	0.0772	0	0	0	0.07378
d__Bacteria|p__Firmicutes|c__Clostridia|o__Lachnospirales|f__Lachnospiraceae|g__Ruminococcus]_torques_group	0.02316	0	0	0	0.01877	0.00302	0	0.02476	0.0122	0	0	0
d__Bacteria|p__Firmicutes|c__Clostridia|o__Lachnospirales|f__Lachnospiraceae|g__Ruminococcus]_torques_group|s__Ruminococcus]_torques_group_unclassified	0.02316	0	0	0	0.01877	0.00302	0	0.02476	0.0122	0	0	0
d__Bacteria|p__Firmicutes|c__Clostridia|o__Lachnospirales|f__Lachnospiraceae|g__Tuzzerella	0.02316	0	0.00274	0.01496	0.0101	0.00454	0.00762	0.02185	0	0	0.03386	0.01691
d__Bacteria|p__Firmicutes|c__Clostridia|o__Lachnospirales|f__Lachnospiraceae|g__Tuzzerella|s__Tuzzerella_unclassified	0.02316	0	0.00274	0.01496	0.0101	0.00454	0.00762	0.02185	0	0	0.03386	0.01691
d__Bacteria|p__Firmicutes|c__Clostridia|o__Lachnospirales|f__Lachnospiraceae|g__Tyzzerella	0.04198	0	0	0.00599	0.00866	0.00907	0.04268	0.00583	0	0	0.19547	0
d__Bacteria|p__Firmicutes|c__Clostridia|o__Lachnospirales|f__Lachnospiraceae|g__Tyzzerella|s__Tyzzerella_unclassified	0.04198	0	0	0.00599	0.00866	0.00907	0.04268	0.00583	0	0	0.19547	0
d__Bacteria|p__Firmicutes|c__Clostridia|o__Monoglobales	0.03908	0.03679	0.04798	0.04339	0.10682	0.0741	0.06402	0.09176	0.12501	0.09837	0.05849	0.04304
d__Bacteria|p__Firmicutes|c__Clostridia|o__Monoglobales|f__Monoglobaceae	0.03908	0.03679	0.04798	0.04339	0.10682	0.0741	0.06402	0.09176	0.12501	0.09837	0.05849	0.04304
d__Bacteria|p__Firmicutes|c__Clostridia|o__Monoglobales|f__Monoglobaceae|g__Monoglobus	0.03908	0.03679	0.04798	0.04339	0.10682	0.0741	0.06402	0.09176	0.12501	0.09837	0.05849	0.04304
d__Bacteria|p__Firmicutes|c__Clostridia|o__Monoglobales|f__Monoglobaceae|g__Monoglobus|s__Monoglobus_unclassified	0.03908	0.03679	0.04798	0.04339	0.10682	0.0741	0.06402	0.09176	0.12501	0.09837	0.05849	0.04304
d__Bacteria|p__Firmicutes|c__Clostridia|o__Oscillospirales	3.65793	0.92906	2.21665	7.58943	3.00247	2.87325	2.90832	2.44407	3.19526	1.44904	5.77034	2.25942
d__Bacteria|p__Firmicutes|c__Clostridia|o__Oscillospirales|f__Butyricicoccaceae	0.05212	0	0	0.05536	0.05341	0.05142	0.08841	0.01457	0.01677	0.17801	0.13391	0.03843
d__Bacteria|p__Firmicutes|c__Clostridia|o__Oscillospirales|f__Butyricicoccaceae|g__Butyricicoccus	0.02606	0	0	0.0389	0.05341	0.04688	0.07317	0.00874	0.0122	0.17801	0.08927	0.02306
d__Bacteria|p__Firmicutes|c__Clostridia|o__Oscillospirales|f__Butyricicoccaceae|g__Butyricicoccus|s__Butyricicoccus_unclassified	0.02606	0	0	0.0389	0.05341	0.04688	0.07317	0.00874	0.0122	0.17801	0.08927	0.02306
d__Bacteria|p__Firmicutes|c__Clostridia|o__Oscillospirales|f__Butyricicoccaceae|g__UCG-009	0.02606	0	0	0.01646	0	0.00454	0.01524	0.00583	0.00457	0	0.04464	0.01537
d__Bacteria|p__Firmicutes|c__Clostridia|o__Oscillospirales|f__Butyricicoccaceae|g__UCG-009|s__UCG-009_unclassified	0.02606	0	0	0.01646	0	0.00454	0.01524	0.00583	0.00457	0	0.04464	0.01537
d__Bacteria|p__Firmicutes|c__Clostridia|o__Oscillospirales|f__Clostridium]_methylpentosum_group	0	0	0	0	0	0	0	0	0.0061	0	0	0
d__Bacteria|p__Firmicutes|c__Clostridia|o__Oscillospirales|f__Clostridium]_methylpentosum_group|g__Clostridium]_methylpentosum_group_unclassified	0	0	0	0	0	0	0	0	0.0061	0	0	0
d__Bacteria|p__Firmicutes|c__Clostridia|o__Oscillospirales|f__Clostridium]_methylpentosum_group|g__Clostridium]_methylpentosum_group_unclassified|s__Clostridium]_methylpentosum_group_unclassified	0	0	0	0	0	0	0	0	0.0061	0	0	0
d__Bacteria|p__Firmicutes|c__Clostridia|o__Oscillospirales|f__Eubacterium]_coprostanoligenes_group	0.4965	0.08432	0.13571	0.04639	0.07506	0.05747	0.05183	0.05972	0.56405	0.11399	0.03232	0.25361
d__Bacteria|p__Firmicutes|c__Clostridia|o__Oscillospirales|f__Eubacterium]_coprostanoligenes_group|g__Eubacterium]_coprostanoligenes_group_unclassified	0.4965	0.08432	0.13571	0.04639	0.07506	0.05747	0.05183	0.05972	0.56405	0.11399	0.03232	0.25361
d__Bacteria|p__Firmicutes|c__Clostridia|o__Oscillospirales|f__Eubacterium]_coprostanoligenes_group|g__Eubacterium]_coprostanoligenes_group_unclassified|s__Eubacterium]_coprostanoligenes_group_unclassified	0.4965	0.08432	0.13571	0.04639	0.07506	0.05747	0.05183	0.05972	0.56405	0.11399	0.03232	0.25361
d__Bacteria|p__Firmicutes|c__Clostridia|o__Oscillospirales|f__Oscillospiraceae	1.06105	0.38941	0.29473	5.31199	0.99169	1.19013	1.75749	1.74638	0.69211	0.43409	4.44358	1.12509
d__Bacteria|p__Firmicutes|c__Clostridia|o__Oscillospirales|f__Oscillospiraceae|g__Colidextribacter	0.31267	0.15178	0.10007	0.42197	0.35221	0.50963	0.18596	0.20683	0.19361	0.14522	0.36632	0.42268
d__Bacteria|p__Firmicutes|c__Clostridia|o__Oscillospirales|f__Oscillospiraceae|g__Colidextribacter|s__Colidextribacter_unclassified	0.31267	0.15178	0.10007	0.42197	0.35221	0.50963	0.18596	0.20683	0.19361	0.14522	0.36632	0.42268
d__Bacteria|p__Firmicutes|c__Clostridia|o__Oscillospirales|f__Oscillospiraceae|g__Flavonifractor	0	0	0	0.01496	0	0	0	0	0	0	0	0.00922
d__Bacteria|p__Firmicutes|c__Clostridia|o__Oscillospirales|f__Oscillospiraceae|g__Flavonifractor|s__Flavonifractor_unclassified	0	0	0	0.01496	0	0	0	0	0	0	0	0.00922
d__Bacteria|p__Firmicutes|c__Clostridia|o__Oscillospirales|f__Oscillospiraceae|g__Intestinimonas	0.14475	0	0.02742	1.62203	0.08372	0.13761	0.58075	0.09759	0.10214	0.14053	1.99477	0.25053
d__Bacteria|p__Firmicutes|c__Clostridia|o__Oscillospirales|f__Oscillospiraceae|g__Intestinimonas|s__Intestinimonas_unclassified	0.14475	0	0.02742	1.62203	0.08372	0.13761	0.58075	0.09759	0.10214	0.14053	1.99477	0.25053
d__Bacteria|p__Firmicutes|c__Clostridia|o__Oscillospirales|f__Oscillospiraceae|g__NK4A214_group	0.00869	0	0	0.01945	0	0	0.01067	0.00291	0	0	0	0
d__Bacteria|p__Firmicutes|c__Clostridia|o__Oscillospirales|f__Oscillospiraceae|g__NK4A214_group|s__NK4A214_group_unclassified	0.00869	0	0	0.01945	0	0	0.01067	0.00291	0	0	0	0
d__Bacteria|p__Firmicutes|c__Clostridia|o__Oscillospirales|f__Oscillospiraceae|g__Oscillibacter	0.43426	0.09352	0.06854	0.36361	0.25406	0.27825	0.28047	0.34083	0.09909	0.06246	0.38787	0.29203
d__Bacteria|p__Firmicutes|c__Clostridia|o__Oscillospirales|f__Oscillospiraceae|g__Oscillibacter|s__Oscillibacter_unclassified	0.43426	0.09352	0.06854	0.36361	0.25406	0.27825	0.28047	0.34083	0.09909	0.06246	0.38787	0.29203
d__Bacteria|p__Firmicutes|c__Clostridia|o__Oscillospirales|f__Oscillospiraceae|g__Oscillospira	0	0	0	0.01197	0	0	0	0.00728	0	0	0	0
d__Bacteria|p__Firmicutes|c__Clostridia|o__Oscillospirales|f__Oscillospiraceae|g__Oscillospiraceae_unclassified	0.13462	0.14104	0.08499	2.79515	0.25839	0.20869	0.67373	1.06473	0.26373	0.05621	1.66384	0.07378
d__Bacteria|p__Firmicutes|c__Clostridia|o__Oscillospirales|f__Oscillospiraceae|g__Oscillospiraceae_unclassified|s__Oscillospiraceae_unclassified	0.13462	0.14104	0.08499	2.79515	0.25839	0.20869	0.67373	1.06473	0.26373	0.05621	1.66384	0.07378
d__Bacteria|p__Firmicutes|c__Clostridia|o__Oscillospirales|f__Oscillospiraceae|g__Oscillospira|s__Oscillospira_unclassified	0	0	0	0.01197	0	0	0	0.00728	0	0	0	0
d__Bacteria|p__Firmicutes|c__Clostridia|o__Oscillospirales|f__Oscillospiraceae|g__UCG-002	0	0	0	0.00599	0	0.00756	0	0	0.00305	0	0	0
d__Bacteria|p__Firmicutes|c__Clostridia|o__Oscillospirales|f__Oscillospiraceae|g__UCG-002|s__UCG-002_unclassified	0	0	0	0.00599	0	0.00756	0	0	0.00305	0	0	0
d__Bacteria|p__Firmicutes|c__Clostridia|o__Oscillospirales|f__Oscillospiraceae|g__UCG-003	0	0	0	0	0	0.01966	0	0.00728	0.01829	0	0	0
d__Bacteria|p__Firmicutes|c__Clostridia|o__Oscillospirales|f__Oscillospiraceae|g__UCG-003|s__UCG-003_unclassified	0	0	0	0	0	0.01966	0	0.00728	0.01829	0	0	0
d__Bacteria|p__Firmicutes|c__Clostridia|o__Oscillospirales|f__Oscillospiraceae|g__UCG-005	0.02606	0.00307	0.01371	0.05686	0.04331	0.02873	0.02591	0.01893	0.0122	0.02967	0.03078	0.07685
d__Bacteria|p__Firmicutes|c__Clostridia|o__Oscillospirales|f__Oscillospiraceae|g__UCG-005|s__UCG-005_unclassified	0.02606	0.00307	0.01371	0.05686	0.04331	0.02873	0.02591	0.01893	0.0122	0.02967	0.03078	0.07685
d__Bacteria|p__Firmicutes|c__Clostridia|o__Oscillospirales|f__Oscillospirales_unclassified	0	0	0	0	0	0.00302	0	0	0.00305	0	0	0
d__Bacteria|p__Firmicutes|c__Clostridia|o__Oscillospirales|f__Oscillospirales_unclassified|g__Oscillospirales_unclassified	0	0	0	0	0	0.00302	0	0	0.00305	0	0	0
d__Bacteria|p__Firmicutes|c__Clostridia|o__Oscillospirales|f__Oscillospirales_unclassified|g__Oscillospirales_unclassified|s__Oscillospirales_unclassified	0	0	0	0	0	0.00302	0	0	0.00305	0	0	0
d__Bacteria|p__Firmicutes|c__Clostridia|o__Oscillospirales|f__Ruminococcaceae	1.95562	0.35568	0.32901	2.1697	1.8621	1.57121	0.95267	0.5899	1.73329	0.70734	1.11128	0.71625
d__Bacteria|p__Firmicutes|c__Clostridia|o__Oscillospirales|f__Ruminococcaceae|g__Anaerofilum	0	0	0	0	0.00866	0	0	0	0	0	0	0
d__Bacteria|p__Firmicutes|c__Clostridia|o__Oscillospirales|f__Ruminococcaceae|g__Anaerofilum|s__Anaerofilum_unclassified	0	0	0	0	0.00866	0	0	0	0	0	0	0
d__Bacteria|p__Firmicutes|c__Clostridia|o__Oscillospirales|f__Ruminococcaceae|g__Anaerotruncus	0.30253	0.09505	0.03427	0.86937	1.2544	1.14023	0.40088	0.11361	0.29879	0.28419	0.43405	0.22594
d__Bacteria|p__Firmicutes|c__Clostridia|o__Oscillospirales|f__Ruminococcaceae|g__Anaerotruncus|s__Anaerotruncus_unclassified	0.30253	0.09505	0.03427	0.86937	1.2544	1.14023	0.40088	0.11361	0.29879	0.28419	0.43405	0.22594
d__Bacteria|p__Firmicutes|c__Clostridia|o__Oscillospirales|f__Ruminococcaceae|g__Candidatus_Soleaferrea	0	0	0	0	0	0	0	0	0	0	0	0
d__Bacteria|p__Firmicutes|c__Clostridia|o__Oscillospirales|f__Ruminococcaceae|g__Candidatus_Soleaferrea|s__Candidatus_Soleaferrea_unclassified	0	0	0	0	0	0	0	0	0	0	0	0
d__Bacteria|p__Firmicutes|c__Clostridia|o__Oscillospirales|f__Ruminococcaceae|g__Eubacterium]_siraeum_group	0.02606	0.06439	0.01782	0.11223	0.02887	0.01512	0.01677	0.02185	0.29727	0.089	0.03694	0.04765
d__Bacteria|p__Firmicutes|c__Clostridia|o__Oscillospirales|f__Ruminococcaceae|g__Eubacterium]_siraeum_group|s__Eubacterium]_siraeum_group_unclassified	0.02606	0.06439	0.01782	0.11223	0.02887	0.01512	0.01677	0.02185	0.29727	0.089	0.03694	0.04765
d__Bacteria|p__Firmicutes|c__Clostridia|o__Oscillospirales|f__Ruminococcaceae|g__Faecalibacterium	0.12594	0	0.02605	0.0389	0.02021	0.02117	0	0	0.02744	0.01561	0.04002	0.05841
d__Bacteria|p__Firmicutes|c__Clostridia|o__Oscillospirales|f__Ruminococcaceae|g__Faecalibacterium|s__Faecalibacterium_unclassified	0.12594	0	0.02605	0.0389	0.02021	0.02117	0	0	0.02744	0.01561	0.04002	0.05841
d__Bacteria|p__Firmicutes|c__Clostridia|o__Oscillospirales|f__Ruminococcaceae|g__Fournierella	0	0	0.00823	0	0	0.00756	0	0	0.00457	0	0.00924	0
d__Bacteria|p__Firmicutes|c__Clostridia|o__Oscillospirales|f__Ruminococcaceae|g__Fournierella|s__Fournierella_unclassified	0	0	0.00823	0	0	0.00756	0	0	0.00457	0	0.00924	0
d__Bacteria|p__Firmicutes|c__Clostridia|o__Oscillospirales|f__Ruminococcaceae|g__Harryflintia	0.04632	0.00307	0	0.03442	0.03897	0	0.0061	0	0.03201	0.00312	0.01539	0.0292
d__Bacteria|p__Firmicutes|c__Clostridia|o__Oscillospirales|f__Ruminococcaceae|g__Harryflintia|s__Harryflintia_unclassified	0.04632	0.00307	0	0.03442	0.03897	0	0.0061	0	0.03201	0.00312	0.01539	0.0292
d__Bacteria|p__Firmicutes|c__Clostridia|o__Oscillospirales|f__Ruminococcaceae|g__Incertae_Sedis	0.19542	0.08432	0.06032	0.54766	0.12558	0.08166	0.33991	0.23742	0.343	0.08744	0.25242	0.17829
d__Bacteria|p__Firmicutes|c__Clostridia|o__Oscillospirales|f__Ruminococcaceae|g__Incertae_Sedis|s__Incertae_Sedis_unclassified	0.19542	0.08432	0.06032	0.54766	0.12558	0.08166	0.33991	0.23742	0.343	0.08744	0.25242	0.17829
d__Bacteria|p__Firmicutes|c__Clostridia|o__Oscillospirales|f__Ruminococcaceae|g__Negativibacillus	0.0275	0	0	0.02993	0.01155	0.01663	0.00762	0.00291	0.01372	0.00625	0.0077	0.03996
d__Bacteria|p__Firmicutes|c__Clostridia|o__Oscillospirales|f__Ruminococcaceae|g__Negativibacillus|s__Negativibacillus_unclassified	0.0275	0	0	0.02993	0.01155	0.01663	0.00762	0.00291	0.01372	0.00625	0.0077	0.03996
d__Bacteria|p__Firmicutes|c__Clostridia|o__Oscillospirales|f__Ruminococcaceae|g__Paludicola	0.01592	0.0046	0.00411	0.01646	0.0101	0.00605	0.00457	0.00728	0.05945	0.04997	0.01077	0.01537
d__Bacteria|p__Firmicutes|c__Clostridia|o__Oscillospirales|f__Ruminococcaceae|g__Paludicola|s__Paludicola_unclassified	0.01592	0.0046	0.00411	0.01646	0.0101	0.00605	0.00457	0.00728	0.05945	0.04997	0.01077	0.01537
d__Bacteria|p__Firmicutes|c__Clostridia|o__Oscillospirales|f__Ruminococcaceae|g__Ruminococcaceae_unclassified	0.16357	0.04599	0.00274	0.23044	0.29592	0.21928	0.10213	0.18061	0.12958	0.16239	0.12467	0.06917
d__Bacteria|p__Firmicutes|c__Clostridia|o__Oscillospirales|f__Ruminococcaceae|g__Ruminococcaceae_unclassified|s__Ruminococcaceae_unclassified	0.16357	0.04599	0.00274	0.23044	0.29592	0.21928	0.10213	0.18061	0.12958	0.16239	0.12467	0.06917
d__Bacteria|p__Firmicutes|c__Clostridia|o__Oscillospirales|f__Ruminococcaceae|g__Ruminococcus	1.01038	0.05366	0.13297	0.26186	0.05485	0.04083	0.05183	0.0102	0.49545	0.00312	0.14314	0.02152
d__Bacteria|p__Firmicutes|c__Clostridia|o__Oscillospirales|f__Ruminococcaceae|g__Ruminococcus|s__Ruminococcus_unclassified	1.01038	0.05366	0.13297	0.26186	0.05485	0.04083	0.05183	0.0102	0.49545	0.00312	0.14314	0.02152
d__Bacteria|p__Firmicutes|c__Clostridia|o__Oscillospirales|f__Ruminococcaceae|g__Subdoligranulum	0.02171	0	0.01234	0.00449	0	0.02268	0	0	0	0	0	0
d__Bacteria|p__Firmicutes|c__Clostridia|o__Oscillospirales|f__Ruminococcaceae|g__Subdoligranulum|s__Subdoligranulum_unclassified	0.02171	0	0.01234	0.00449	0	0.02268	0	0	0	0	0	0
d__Bacteria|p__Firmicutes|c__Clostridia|o__Oscillospirales|f__Ruminococcaceae|g__UBA1819	0.02027	0.0046	0.03016	0.02394	0.01299	0	0.02286	0.01602	0.03201	0.00625	0.03694	0.03074
d__Bacteria|p__Firmicutes|c__Clostridia|o__Oscillospirales|f__Ruminococcaceae|g__UBA1819|s__UBA1819_unclassified	0.02027	0.0046	0.03016	0.02394	0.01299	0	0.02286	0.01602	0.03201	0.00625	0.03694	0.03074
d__Bacteria|p__Firmicutes|c__Clostridia|o__Oscillospirales|f__UCG-010	0.09264	0.09965	1.4572	0.00599	0.02021	0	0.05792	0.0335	0.17989	0.01561	0.04925	0.12604
d__Bacteria|p__Firmicutes|c__Clostridia|o__Oscillospirales|f__UCG-010|g__UCG-010_unclassified	0.09264	0.09965	1.4572	0.00599	0.02021	0	0.05792	0.0335	0.17989	0.01561	0.04925	0.12604
d__Bacteria|p__Firmicutes|c__Clostridia|o__Oscillospirales|f__UCG-010|g__UCG-010_unclassified|s__UCG-010_unclassified	0.09264	0.09965	1.4572	0.00599	0.02021	0	0.05792	0.0335	0.17989	0.01561	0.04925	0.12604
d__Bacteria|p__Firmicutes|c__Clostridia|o__Peptococcales	0.06659	0.01686	0.02468	0.09427	0.06496	0.09981	0.06097	0.05826	0.03964	0.02811	0.12929	0.09068
d__Bacteria|p__Firmicutes|c__Clostridia|o__Peptococcales|f__Peptococcaceae	0.06659	0.01686	0.02468	0.09427	0.06496	0.09981	0.06097	0.05826	0.03964	0.02811	0.12929	0.09068
d__Bacteria|p__Firmicutes|c__Clostridia|o__Peptococcales|f__Peptococcaceae|g__Peptococcaceae_unclassified	0.05356	0.01686	0.02468	0.0823	0.06496	0.09981	0.0564	0.05098	0.03964	0.02811	0.10466	0.09068
d__Bacteria|p__Firmicutes|c__Clostridia|o__Peptococcales|f__Peptococcaceae|g__Peptococcaceae_unclassified|s__Peptococcaceae_unclassified	0.05356	0.01686	0.02468	0.0823	0.06496	0.09981	0.0564	0.05098	0.03964	0.02811	0.10466	0.09068
d__Bacteria|p__Firmicutes|c__Clostridia|o__Peptococcales|f__Peptococcaceae|g__Peptococcus	0.01303	0	0	0.01197	0	0	0.00457	0.00728	0	0	0.02463	0
d__Bacteria|p__Firmicutes|c__Clostridia|o__Peptococcales|f__Peptococcaceae|g__Peptococcus|s__Peptococcus_unclassified	0.01303	0	0	0.01197	0	0	0.00457	0.00728	0	0	0.02463	0
d__Bacteria|p__Firmicutes|c__Clostridia|o__Peptostreptococcales-Tissierellales	0.09699	0.1717	0.658	0.21097	0.39696	0.03478	0.06859	0.04807	0.21038	0.0203	0.13544	0.16753
d__Bacteria|p__Firmicutes|c__Clostridia|o__Peptostreptococcales-Tissierellales|f__Anaerovoracaceae	0.0883	0.07205	0.53463	0.04788	0.03176	0.02873	0.05639	0.02622	0.21038	0.0203	0.11697	0.1537
d__Bacteria|p__Firmicutes|c__Clostridia|o__Peptostreptococcales-Tissierellales|f__Anaerovoracaceae|g__Anaerovorax	0.01737	0	0.00823	0	0	0	0	0	0.0061	0	0	0
d__Bacteria|p__Firmicutes|c__Clostridia|o__Peptostreptococcales-Tissierellales|f__Anaerovoracaceae|g__Anaerovorax|s__Anaerovorax_unclassified	0.01737	0	0.00823	0	0	0	0	0	0.0061	0	0	0
d__Bacteria|p__Firmicutes|c__Clostridia|o__Peptostreptococcales-Tissierellales|f__Anaerovoracaceae|g__Eubacterium]_brachy_group	0	0.01073	0.10418	0.03142	0.00866	0.00907	0.01829	0.00874	0.02744	0.0203	0.06157	0.01383
d__Bacteria|p__Firmicutes|c__Clostridia|o__Peptostreptococcales-Tissierellales|f__Anaerovoracaceae|g__Eubacterium]_brachy_group|s__Eubacterium]_brachy_group_unclassified	0	0.01073	0.10418	0.03142	0.00866	0.00907	0.01829	0.00874	0.02744	0.0203	0.06157	0.01383
d__Bacteria|p__Firmicutes|c__Clostridia|o__Peptostreptococcales-Tissierellales|f__Anaerovoracaceae|g__Eubacterium]_nodatum_group	0.03908	0.04139	0.20837	0	0.01877	0.00907	0.01829	0.00437	0.12653	0	0.01231	0.03843
d__Bacteria|p__Firmicutes|c__Clostridia|o__Peptostreptococcales-Tissierellales|f__Anaerovoracaceae|g__Eubacterium]_nodatum_group|s__Eubacterium]_nodatum_group_unclassified	0.03908	0.04139	0.20837	0	0.01877	0.00907	0.01829	0.00437	0.12653	0	0.01231	0.03843
d__Bacteria|p__Firmicutes|c__Clostridia|o__Peptostreptococcales-Tissierellales|f__Anaerovoracaceae|g__Family_XIII_AD3011_group	0.03185	0.00767	0.21385	0.00449	0	0.00454	0.00457	0.00437	0.03964	0	0.01077	0.07224
d__Bacteria|p__Firmicutes|c__Clostridia|o__Peptostreptococcales-Tissierellales|f__Anaerovoracaceae|g__Family_XIII_AD3011_group|s__Family_XIII_AD3011_group_unclassified	0.03185	0.00767	0.21385	0.00449	0	0.00454	0.00457	0.00437	0.03964	0	0.01077	0.07224
d__Bacteria|p__Firmicutes|c__Clostridia|o__Peptostreptococcales-Tissierellales|f__Anaerovoracaceae|g__Family_XIII_UCG-001	0	0.01226	0	0.01197	0.00433	0.00605	0.01524	0.00874	0.01067	0	0.03232	0.0292
d__Bacteria|p__Firmicutes|c__Clostridia|o__Peptostreptococcales-Tissierellales|f__Anaerovoracaceae|g__Family_XIII_UCG-001|s__Family_XIII_UCG-001_unclassified	0	0.01226	0	0.01197	0.00433	0.00605	0.01524	0.00874	0.01067	0	0.03232	0.0292
d__Bacteria|p__Firmicutes|c__Clostridia|o__Peptostreptococcales-Tissierellales|f__Peptostreptococcaceae	0.00869	0.09965	0.12337	0.16309	0.3652	0.00605	0.0122	0.02185	0	0	0.01847	0.01383
d__Bacteria|p__Firmicutes|c__Clostridia|o__Peptostreptococcales-Tissierellales|f__Peptostreptococcaceae|g__Clostridioides	0	0	0	0	0	0	0	0	0	0	0	0
d__Bacteria|p__Firmicutes|c__Clostridia|o__Peptostreptococcales-Tissierellales|f__Peptostreptococcaceae|g__Clostridioides|s__Clostridioides_unclassified	0	0	0	0	0	0	0	0	0	0	0	0
d__Bacteria|p__Firmicutes|c__Clostridia|o__Peptostreptococcales-Tissierellales|f__Peptostreptococcaceae|g__Peptoclostridium	0	0	0	0.00299	0	0	0	0	0	0	0.00308	0
d__Bacteria|p__Firmicutes|c__Clostridia|o__Peptostreptococcales-Tissierellales|f__Peptostreptococcaceae|g__Peptoclostridium|s__Peptoclostridium_unclassified	0	0	0	0.00299	0	0	0	0	0	0	0.00308	0
d__Bacteria|p__Firmicutes|c__Clostridia|o__Peptostreptococcales-Tissierellales|f__Peptostreptococcaceae|g__Peptostreptococcus	0	0	0.00274	0	0.0101	0	0.00305	0	0	0	0.00308	0
d__Bacteria|p__Firmicutes|c__Clostridia|o__Peptostreptococcales-Tissierellales|f__Peptostreptococcaceae|g__Peptostreptococcus|s__Peptostreptococcus_unclassified	0	0	0.00274	0	0.0101	0	0.00305	0	0	0	0.00308	0
d__Bacteria|p__Firmicutes|c__Clostridia|o__Peptostreptococcales-Tissierellales|f__Peptostreptococcaceae|g__Romboutsia	0.00869	0.09965	0.12063	0.14963	0.3551	0.00605	0.00915	0.02185	0	0	0.01231	0
d__Bacteria|p__Firmicutes|c__Clostridia|o__Peptostreptococcales-Tissierellales|f__Peptostreptococcaceae|g__Romboutsia|s__Romboutsia_unclassified	0.00869	0.09965	0.12063	0.14963	0.3551	0.00605	0.00915	0.02185	0	0	0.01231	0
d__Bacteria|p__Firmicutes|c__Clostridia|o__Peptostreptococcales-Tissierellales|f__Peptostreptococcaceae|g__Terrisporobacter	0	0	0	0.01047	0	0	0	0	0	0	0	0.01383
d__Bacteria|p__Firmicutes|c__Clostridia|o__Peptostreptococcales-Tissierellales|f__Peptostreptococcaceae|g__Terrisporobacter|s__Terrisporobacter_unclassified	0	0	0	0.01047	0	0	0	0	0	0	0	0.01383
d__Bacteria|p__Firmicutes|c__Erysipelotrichia	0.02171	0.02606	0.01782	0.1227	0.18477	0.17996	0.07012	0.16896	0.11129	0.06558	0.10159	0.17061
d__Bacteria|p__Firmicutes|c__Erysipelotrichia|o__Erysipelotrichales	0.02171	0.02606	0.01782	0.1227	0.18477	0.17996	0.07012	0.16896	0.11129	0.06558	0.10159	0.17061
d__Bacteria|p__Firmicutes|c__Erysipelotrichia|o__Erysipelotrichales|f__Erysipelotrichaceae	0.02171	0.02606	0.01782	0.1227	0.18477	0.17996	0.07012	0.16896	0.11129	0.06558	0.10159	0.17061
d__Bacteria|p__Firmicutes|c__Erysipelotrichia|o__Erysipelotrichales|f__Erysipelotrichaceae|g__Absiella	0.02171	0.02606	0.01782	0.1227	0.18477	0.17996	0.07012	0.16896	0.11129	0.06558	0.09543	0.17061
d__Bacteria|p__Firmicutes|c__Erysipelotrichia|o__Erysipelotrichales|f__Erysipelotrichaceae|g__Absiella|s__Absiella_sp.	0.02171	0.02606	0.01782	0.1227	0.18477	0.17996	0.07012	0.16896	0.11129	0.06558	0.09543	0.17061
d__Bacteria|p__Firmicutes|c__Erysipelotrichia|o__Erysipelotrichales|f__Erysipelotrichaceae|g__Erysipelatoclostridium	0	0	0	0	0	0	0	0	0	0	0.00616	0
d__Bacteria|p__Firmicutes|c__Erysipelotrichia|o__Erysipelotrichales|f__Erysipelotrichaceae|g__Erysipelatoclostridium|s__Erysipelatoclostridium_sp._SNUG30386	0	0	0	0	0	0	0	0	0	0	0.00616	0
d__Bacteria|p__Firmicutes|c__Firmicutes_unclassified	0.71942	0.24683	0.24675	0.78707	0.24106	0.26767	0.34296	0.68603	0.40856	0.27638	0.63722	0.55333
d__Bacteria|p__Firmicutes|c__Firmicutes_unclassified|o__Firmicutes_unclassified	0.71942	0.24683	0.24675	0.78707	0.24106	0.26767	0.34296	0.68603	0.40856	0.27638	0.63722	0.55333
d__Bacteria|p__Firmicutes|c__Firmicutes_unclassified|o__Firmicutes_unclassified|f__Firmicutes_unclassified	0.71942	0.24683	0.24675	0.78707	0.24106	0.26767	0.34296	0.68603	0.40856	0.27638	0.63722	0.55333
d__Bacteria|p__Firmicutes|c__Firmicutes_unclassified|o__Firmicutes_unclassified|f__Firmicutes_unclassified|g__Firmicutes_unclassified	0.71942	0.24683	0.24675	0.78707	0.24106	0.26767	0.34296	0.68603	0.40856	0.27638	0.63722	0.55333
d__Bacteria|p__Firmicutes|c__Firmicutes_unclassified|o__Firmicutes_unclassified|f__Firmicutes_unclassified|g__Firmicutes_unclassified|s__Firmicutes_unclassified	0.71942	0.24683	0.24675	0.78707	0.24106	0.26767	0.34296	0.68603	0.40856	0.27638	0.63722	0.55333
d__Bacteria|p__Firmicutes|c__Negativicutes	0.07962	0.27596	0.46197	0.34116	0.52255	0.32664	0.19511	0.24907	0.218	0.27794	0.43097	0.28896
d__Bacteria|p__Firmicutes|c__Negativicutes|o__Acidaminococcales	0.01737	0	0	0	0.00722	0	0.00457	0.01602	0	0	0.00462	0.00461
d__Bacteria|p__Firmicutes|c__Negativicutes|o__Acidaminococcales|f__Acidaminococcaceae	0.01737	0	0	0	0.00722	0	0.00457	0.01602	0	0	0.00462	0.00461
d__Bacteria|p__Firmicutes|c__Negativicutes|o__Acidaminococcales|f__Acidaminococcaceae|g__Phascolarctobacterium	0.01737	0	0	0	0.00722	0	0.00457	0.01602	0	0	0.00462	0.00461
d__Bacteria|p__Firmicutes|c__Negativicutes|o__Acidaminococcales|f__Acidaminococcaceae|g__Phascolarctobacterium|s__Phascolarctobacterium_faecium	0.01737	0	0	0	0	0	0	0.01165	0	0	0	0
d__Bacteria|p__Firmicutes|c__Negativicutes|o__Acidaminococcales|f__Acidaminococcaceae|g__Phascolarctobacterium|s__Phascolarctobacterium_sp.	0	0	0	0	0.00722	0	0	0	0	0	0	0.00461
d__Bacteria|p__Firmicutes|c__Negativicutes|o__Acidaminococcales|f__Acidaminococcaceae|g__Phascolarctobacterium|s__Phascolarctobacterium_succinatutens	0	0	0	0	0	0	0	0	0	0	0.00462	0
d__Bacteria|p__Firmicutes|c__Negativicutes|o__Acidaminococcales|f__Acidaminococcaceae|g__Phascolarctobacterium|s__Phascolarctobacterium_unclassified	0	0	0	0	0	0	0.00457	0.00437	0	0	0	0
d__Bacteria|p__Firmicutes|c__Negativicutes|o__Veillonellales-Selenomonadales	0.06225	0.27596	0.46197	0.34116	0.51533	0.32664	0.19054	0.23305	0.218	0.27794	0.42635	0.28435
d__Bacteria|p__Firmicutes|c__Negativicutes|o__Veillonellales-Selenomonadales|f__Selenomonadaceae	0.03619	0	0	0.01047	0.04619	0	0	0.03059	0.01372	0.01874	0.00616	0.01998
d__Bacteria|p__Firmicutes|c__Negativicutes|o__Veillonellales-Selenomonadales|f__Selenomonadaceae|g__Megamonas	0.03619	0	0	0	0.04619	0	0	0.03059	0.01372	0.01874	0.00616	0
d__Bacteria|p__Firmicutes|c__Negativicutes|o__Veillonellales-Selenomonadales|f__Selenomonadaceae|g__Megamonas|s__Megamonas_unclassified	0.03619	0	0	0	0.04619	0	0	0.03059	0.01372	0.01874	0.00616	0
d__Bacteria|p__Firmicutes|c__Negativicutes|o__Veillonellales-Selenomonadales|f__Selenomonadaceae|g__Quinella	0	0	0	0.01047	0	0	0	0	0	0	0	0.01998
d__Bacteria|p__Firmicutes|c__Negativicutes|o__Veillonellales-Selenomonadales|f__Selenomonadaceae|g__Quinella|s__Quinella_unclassified	0	0	0	0.01047	0	0	0	0	0	0	0	0.01998
d__Bacteria|p__Firmicutes|c__Negativicutes|o__Veillonellales-Selenomonadales|f__Veillonellaceae	0.02606	0.27596	0.46197	0.33069	0.46914	0.32664	0.19054	0.20246	0.20428	0.2592	0.42019	0.26437
d__Bacteria|p__Firmicutes|c__Negativicutes|o__Veillonellales-Selenomonadales|f__Veillonellaceae|g__Dialister	0.02606	0.00307	0	0	0	0	0.0061	0	0	0	0	0
d__Bacteria|p__Firmicutes|c__Negativicutes|o__Veillonellales-Selenomonadales|f__Veillonellaceae|g__Dialister|s__Dialister_unclassified	0.02606	0.00307	0	0	0	0	0.0061	0	0	0	0	0
d__Bacteria|p__Firmicutes|c__Negativicutes|o__Veillonellales-Selenomonadales|f__Veillonellaceae|g__Megasphaera	0	0	0	0	0.00722	0.02268	0.02439	0	0	0	0	0
d__Bacteria|p__Firmicutes|c__Negativicutes|o__Veillonellales-Selenomonadales|f__Veillonellaceae|g__Megasphaera|s__Megasphaera_unclassified	0	0	0	0	0.00722	0.02268	0.02439	0	0	0	0	0
d__Bacteria|p__Firmicutes|c__Negativicutes|o__Veillonellales-Selenomonadales|f__Veillonellaceae|g__Veillonella	0	0.27289	0.46197	0.33069	0.46192	0.30396	0.16005	0.20246	0.19513	0.2592	0.42019	0.26437
d__Bacteria|p__Firmicutes|c__Negativicutes|o__Veillonellales-Selenomonadales|f__Veillonellaceae|g__Veillonellaceae_unclassified	0	0	0	0	0	0	0	0	0.00915	0	0	0
d__Bacteria|p__Firmicutes|c__Negativicutes|o__Veillonellales-Selenomonadales|f__Veillonellaceae|g__Veillonellaceae_unclassified|s__Veillonellaceae_unclassified	0	0	0	0	0	0	0	0	0.00915	0	0	0
d__Bacteria|p__Firmicutes|c__Negativicutes|o__Veillonellales-Selenomonadales|f__Veillonellaceae|g__Veillonella|s__Veillonella_unclassified	0	0.27289	0.46197	0.33069	0.46192	0.30396	0.16005	0.20246	0.19513	0.2592	0.42019	0.26437
d__Bacteria|p__Fusobacteriota	0	0.12418	0.10007	0.11671	0.12125	0.08166	0.09298	0.08739	0.11281	0.089	0.07696	0.10759
d__Bacteria|p__Fusobacteriota|c__Fusobacteriia	0	0.12418	0.10007	0.11671	0.12125	0.08166	0.09298	0.08739	0.11281	0.089	0.07696	0.10759
d__Bacteria|p__Fusobacteriota|c__Fusobacteriia|o__Fusobacteriales	0	0.12418	0.10007	0.11671	0.12125	0.08166	0.09298	0.08739	0.11281	0.089	0.07696	0.10759
d__Bacteria|p__Fusobacteriota|c__Fusobacteriia|o__Fusobacteriales|f__Fusobacteriaceae	0	0.12418	0.10007	0.11671	0.12125	0.08166	0.09298	0.08739	0.11281	0.089	0.07696	0.10759
d__Bacteria|p__Fusobacteriota|c__Fusobacteriia|o__Fusobacteriales|f__Fusobacteriaceae|g__Cetobacterium	0	0	0	0	0	0	0	0	0.01677	0	0	0
d__Bacteria|p__Fusobacteriota|c__Fusobacteriia|o__Fusobacteriales|f__Fusobacteriaceae|g__Cetobacterium|s__Cetobacterium_unclassified	0	0	0	0	0	0	0	0	0.01677	0	0	0
d__Bacteria|p__Fusobacteriota|c__Fusobacteriia|o__Fusobacteriales|f__Fusobacteriaceae|g__Fusobacterium	0	0.12418	0.10007	0.11671	0.12125	0.08166	0.09298	0.08739	0.09604	0.089	0.07696	0.10759
d__Bacteria|p__Fusobacteriota|c__Fusobacteriia|o__Fusobacteriales|f__Fusobacteriaceae|g__Fusobacterium|s__Fusobacterium_unclassified	0	0.12418	0.10007	0.11671	0.12125	0.08166	0.09298	0.08739	0.09604	0.089	0.07696	0.10759
d__Bacteria|p__MBNT15	0	0	0	0	0	0	0	0	0	0	0	0
d__Bacteria|p__MBNT15|c__MBNT15_unclassified	0	0	0	0	0	0	0	0	0	0	0	0
d__Bacteria|p__MBNT15|c__MBNT15_unclassified|o__MBNT15_unclassified	0	0	0	0	0	0	0	0	0	0	0	0
d__Bacteria|p__MBNT15|c__MBNT15_unclassified|o__MBNT15_unclassified|f__MBNT15_unclassified	0	0	0	0	0	0	0	0	0	0	0	0
d__Bacteria|p__MBNT15|c__MBNT15_unclassified|o__MBNT15_unclassified|f__MBNT15_unclassified|g__MBNT15_unclassified	0	0	0	0	0	0	0	0	0	0	0	0
d__Bacteria|p__MBNT15|c__MBNT15_unclassified|o__MBNT15_unclassified|f__MBNT15_unclassified|g__MBNT15_unclassified|s__MBNT15_unclassified	0	0	0	0	0	0	0	0	0	0	0	0
d__Bacteria|p__Patescibacteria	0.19686	0.60557	4.52651	1.97815	0.92095	0.83929	0.53807	1.42741	1.16316	6.14597	1.24673	0.19213
d__Bacteria|p__Patescibacteria|c__Saccharimonadia	0.19686	0.60557	4.52651	1.97815	0.92095	0.83929	0.53807	1.42741	1.16316	6.14597	1.24673	0.19213
d__Bacteria|p__Patescibacteria|c__Saccharimonadia|o__Saccharimonadales	0.19686	0.60557	4.52651	1.97815	0.92095	0.83929	0.53807	1.42741	1.16316	6.14597	1.24673	0.19213
d__Bacteria|p__Patescibacteria|c__Saccharimonadia|o__Saccharimonadales|f__Saccharimonadaceae	0.19686	0.60557	4.52651	1.97815	0.92095	0.83929	0.53807	1.42741	1.16316	6.14597	1.24673	0.19213
d__Bacteria|p__Patescibacteria|c__Saccharimonadia|o__Saccharimonadales|f__Saccharimonadaceae|g__Candidatus_Saccharimonas	0.19686	0.60557	4.52651	1.97815	0.92095	0.83929	0.53807	1.42741	1.16316	6.14597	1.24673	0.19213
d__Bacteria|p__Patescibacteria|c__Saccharimonadia|o__Saccharimonadales|f__Saccharimonadaceae|g__Candidatus_Saccharimonas|s__Candidatus_Saccharimonas_unclassified	0.19686	0.60557	4.52651	1.97815	0.92095	0.83929	0.53807	1.42741	1.16316	6.14597	1.24673	0.19213
d__Bacteria|p__Proteobacteria	1.38535	2.44525	3.29823	2.17866	1.8751	2.00525	1.72549	2.83152	1.94978	2.09395	1.62385	1.65997
d__Bacteria|p__Proteobacteria|c__Alphaproteobacteria	0.14044	0.37253	0.10692	0.14214	0.41285	0.06503	0.30029	0.25198	0.2988	0.14522	0.08005	0.12295
d__Bacteria|p__Proteobacteria|c__Alphaproteobacteria|o__Acetobacterales	0	0	0	0	0	0	0	0	0	0	0.00308	0
d__Bacteria|p__Proteobacteria|c__Alphaproteobacteria|o__Acetobacterales|f__Acetobacteraceae	0	0	0	0	0	0	0	0	0	0	0.00308	0
d__Bacteria|p__Proteobacteria|c__Alphaproteobacteria|o__Acetobacterales|f__Acetobacteraceae|g__Bombella	0	0	0	0	0	0	0	0	0	0	0.00308	0
d__Bacteria|p__Proteobacteria|c__Alphaproteobacteria|o__Acetobacterales|f__Acetobacteraceae|g__Bombella|s__Bombella_unclassified	0	0	0	0	0	0	0	0	0	0	0.00308	0
d__Bacteria|p__Proteobacteria|c__Alphaproteobacteria|o__Acetobacterales|f__Acetobacteraceae|g__Muricoccus	0	0	0	0	0	0	0	0	0	0	0	0
d__Bacteria|p__Proteobacteria|c__Alphaproteobacteria|o__Acetobacterales|f__Acetobacteraceae|g__Muricoccus|s__Muricoccus_unclassified	0	0	0	0	0	0	0	0	0	0	0	0
d__Bacteria|p__Proteobacteria|c__Alphaproteobacteria|o__Alphaproteobacteria_unclassified	0	0	0	0	0	0	0	0	0.00305	0	0	0
d__Bacteria|p__Proteobacteria|c__Alphaproteobacteria|o__Alphaproteobacteria_unclassified|f__Alphaproteobacteria_unclassified	0	0	0	0	0	0	0	0	0.00305	0	0	0
d__Bacteria|p__Proteobacteria|c__Alphaproteobacteria|o__Alphaproteobacteria_unclassified|f__Alphaproteobacteria_unclassified|g__Alphaproteobacteria_unclassified	0	0	0	0	0	0	0	0	0.00305	0	0	0
d__Bacteria|p__Proteobacteria|c__Alphaproteobacteria|o__Alphaproteobacteria_unclassified|f__Alphaproteobacteria_unclassified|g__Alphaproteobacteria_unclassified|s__Alphaproteobacteria_unclassified	0	0	0	0	0	0	0	0	0.00305	0	0	0
d__Bacteria|p__Proteobacteria|c__Alphaproteobacteria|o__Caulobacterales	0	0.11038	0.08088	0.06883	0.19055	0.04688	0.1509	0.16459	0.19361	0.08432	0.06465	0.05072
d__Bacteria|p__Proteobacteria|c__Alphaproteobacteria|o__Caulobacterales|f__Caulobacteraceae	0	0.11038	0.08088	0.06883	0.19055	0.04688	0.1509	0.16459	0.19361	0.08432	0.06465	0.05072
d__Bacteria|p__Proteobacteria|c__Alphaproteobacteria|o__Caulobacterales|f__Caulobacteraceae|g__Brevundimonas	0	0.11038	0.08088	0.06883	0.19055	0.04688	0.1509	0.16168	0.19361	0.08432	0.06465	0.05072
d__Bacteria|p__Proteobacteria|c__Alphaproteobacteria|o__Caulobacterales|f__Caulobacteraceae|g__Brevundimonas|s__Brevundimonas_sp._MC8-1	0	0	0	0	0.02743	0	0	0	0	0	0	0
d__Bacteria|p__Proteobacteria|c__Alphaproteobacteria|o__Caulobacterales|f__Caulobacteraceae|g__Brevundimonas|s__Brevundimonas_sp._N4_98_6	0	0	0	0	0	0	0	0	0	0	0	0
d__Bacteria|p__Proteobacteria|c__Alphaproteobacteria|o__Caulobacterales|f__Caulobacteraceae|g__Brevundimonas|s__Brevundimonas_sp._NA61	0	0.11038	0.08088	0.06883	0.16312	0.04688	0.1509	0.16168	0.19361	0.08432	0.06465	0.05072
d__Bacteria|p__Proteobacteria|c__Alphaproteobacteria|o__Caulobacterales|f__Caulobacteraceae|g__Caulobacter	0	0	0	0	0	0	0	0.00291	0	0	0	0
d__Bacteria|p__Proteobacteria|c__Alphaproteobacteria|o__Caulobacterales|f__Caulobacteraceae|g__Caulobacter|s__Caulobacter_sp._NW-2013-Rh15	0	0	0	0	0	0	0	0.00291	0	0	0	0
d__Bacteria|p__Proteobacteria|c__Alphaproteobacteria|o__Reyranellales	0	0	0.00685	0	0	0	0	0	0	0	0	0
d__Bacteria|p__Proteobacteria|c__Alphaproteobacteria|o__Reyranellales|f__Reyranellaceae	0	0	0.00685	0	0	0	0	0	0	0	0	0
d__Bacteria|p__Proteobacteria|c__Alphaproteobacteria|o__Reyranellales|f__Reyranellaceae|g__Reyranella	0	0	0.00685	0	0	0	0	0	0	0	0	0
d__Bacteria|p__Proteobacteria|c__Alphaproteobacteria|o__Reyranellales|f__Reyranellaceae|g__Reyranella|s__Reyranella_unclassified	0	0	0.00685	0	0	0	0	0	0	0	0	0
d__Bacteria|p__Proteobacteria|c__Alphaproteobacteria|o__Rhizobiales	0.12451	0	0	0.00299	0.00289	0	0.00915	0	0	0.00312	0.00616	0
d__Bacteria|p__Proteobacteria|c__Alphaproteobacteria|o__Rhizobiales|f__Beijerinckiaceae	0	0	0	0.00299	0.00289	0	0	0	0	0	0	0
d__Bacteria|p__Proteobacteria|c__Alphaproteobacteria|o__Rhizobiales|f__Beijerinckiaceae|g__Bosea	0	0	0	0.00299	0	0	0	0	0	0	0	0
d__Bacteria|p__Proteobacteria|c__Alphaproteobacteria|o__Rhizobiales|f__Beijerinckiaceae|g__Bosea|s__Bosea_unclassified	0	0	0	0.00299	0	0	0	0	0	0	0	0
d__Bacteria|p__Proteobacteria|c__Alphaproteobacteria|o__Rhizobiales|f__Beijerinckiaceae|g__Methylobacterium-Methylorubrum	0	0	0	0	0.00289	0	0	0	0	0	0	0
d__Bacteria|p__Proteobacteria|c__Alphaproteobacteria|o__Rhizobiales|f__Beijerinckiaceae|g__Methylobacterium-Methylorubrum|s__Methylobacterium-Methylorubrum_unclassified	0	0	0	0	0.00289	0	0	0	0	0	0	0
d__Bacteria|p__Proteobacteria|c__Alphaproteobacteria|o__Rhizobiales|f__Hyphomicrobiaceae	0.01159	0	0	0	0	0	0	0	0	0	0	0
d__Bacteria|p__Proteobacteria|c__Alphaproteobacteria|o__Rhizobiales|f__Hyphomicrobiaceae|g__Devosia	0.00869	0	0	0	0	0	0	0	0	0	0	0
d__Bacteria|p__Proteobacteria|c__Alphaproteobacteria|o__Rhizobiales|f__Hyphomicrobiaceae|g__Devosia|s__uncultured_Devosia_sp.	0.00869	0	0	0	0	0	0	0	0	0	0	0
d__Bacteria|p__Proteobacteria|c__Alphaproteobacteria|o__Rhizobiales|f__Hyphomicrobiaceae|g__Hyphomicrobium	0.0029	0	0	0	0	0	0	0	0	0	0	0
d__Bacteria|p__Proteobacteria|c__Alphaproteobacteria|o__Rhizobiales|f__Hyphomicrobiaceae|g__Hyphomicrobium|s__Hyphomicrobium_sp._2NES1	0.0029	0	0	0	0	0	0	0	0	0	0	0
d__Bacteria|p__Proteobacteria|c__Alphaproteobacteria|o__Rhizobiales|f__Phyllobacteriaceae	0.0304	0	0	0	0	0	0	0	0	0	0	0
d__Bacteria|p__Proteobacteria|c__Alphaproteobacteria|o__Rhizobiales|f__Phyllobacteriaceae|g__Mesorhizobium	0.0304	0	0	0	0	0	0	0	0	0	0	0
d__Bacteria|p__Proteobacteria|c__Alphaproteobacteria|o__Rhizobiales|f__Phyllobacteriaceae|g__Mesorhizobium|s__Mesorhizobium_sp._PETBA10	0.0304	0	0	0	0	0	0	0	0	0	0	0
d__Bacteria|p__Proteobacteria|c__Alphaproteobacteria|o__Rhizobiales|f__Rhizobiaceae	0.05935	0	0	0	0	0	0.00915	0	0	0	0.00616	0
d__Bacteria|p__Proteobacteria|c__Alphaproteobacteria|o__Rhizobiales|f__Rhizobiaceae|g__Allorhizobium-Neorhizobium-Pararhizobium-Rhizobium	0.04053	0	0	0	0	0	0.0061	0	0	0	0	0
d__Bacteria|p__Proteobacteria|c__Alphaproteobacteria|o__Rhizobiales|f__Rhizobiaceae|g__Allorhizobium-Neorhizobium-Pararhizobium-Rhizobium|s__Allorhizobium-Neorhizobium-Pararhizobium-Rhizobium_unclassified	0.04053	0	0	0	0	0	0.0061	0	0	0	0	0
d__Bacteria|p__Proteobacteria|c__Alphaproteobacteria|o__Rhizobiales|f__Rhizobiaceae|g__Ochrobactrum	0	0	0	0	0	0	0.00305	0	0	0	0	0
d__Bacteria|p__Proteobacteria|c__Alphaproteobacteria|o__Rhizobiales|f__Rhizobiaceae|g__Ochrobactrum|s__Ochrobactrum_unclassified	0	0	0	0	0	0	0.00305	0	0	0	0	0
d__Bacteria|p__Proteobacteria|c__Alphaproteobacteria|o__Rhizobiales|f__Rhizobiaceae|g__Shinella	0.01882	0	0	0	0	0	0	0	0	0	0	0
d__Bacteria|p__Proteobacteria|c__Alphaproteobacteria|o__Rhizobiales|f__Rhizobiaceae|g__Shinella|s__Shinella_fusca	0.01882	0	0	0	0	0	0	0	0	0	0	0
d__Bacteria|p__Proteobacteria|c__Alphaproteobacteria|o__Rhizobiales|f__Rhizobiaceae|g__Tianweitania	0	0	0	0	0	0	0	0	0	0	0.00616	0
d__Bacteria|p__Proteobacteria|c__Alphaproteobacteria|o__Rhizobiales|f__Rhizobiaceae|g__Tianweitania|s__Tianweitania_unclassified	0	0	0	0	0	0	0	0	0	0	0.00616	0
d__Bacteria|p__Proteobacteria|c__Alphaproteobacteria|o__Rhizobiales|f__Xanthobacteraceae	0.02317	0	0	0	0	0	0	0	0	0.00312	0	0
d__Bacteria|p__Proteobacteria|c__Alphaproteobacteria|o__Rhizobiales|f__Xanthobacteraceae|g__Pseudolabrys	0.01448	0	0	0	0	0	0	0	0	0	0	0
d__Bacteria|p__Proteobacteria|c__Alphaproteobacteria|o__Rhizobiales|f__Xanthobacteraceae|g__Pseudolabrys|s__Pseudolabrys_unclassified	0.01448	0	0	0	0	0	0	0	0	0	0	0
d__Bacteria|p__Proteobacteria|c__Alphaproteobacteria|o__Rhizobiales|f__Xanthobacteraceae|g__Rhodopseudomonas	0.00869	0	0	0	0	0	0	0	0	0	0	0
d__Bacteria|p__Proteobacteria|c__Alphaproteobacteria|o__Rhizobiales|f__Xanthobacteraceae|g__Rhodopseudomonas|s__Rhodopseudomonas_unclassified	0.00869	0	0	0	0	0	0	0	0	0	0	0
d__Bacteria|p__Proteobacteria|c__Alphaproteobacteria|o__Rhizobiales|f__Xanthobacteraceae|g__Xanthobacter	0	0	0	0	0	0	0	0	0	0.00312	0	0
d__Bacteria|p__Proteobacteria|c__Alphaproteobacteria|o__Rhizobiales|f__Xanthobacteraceae|g__Xanthobacter|s__Xanthobacter_sp._Y8	0	0	0	0	0	0	0	0	0	0.00312	0	0
d__Bacteria|p__Proteobacteria|c__Alphaproteobacteria|o__Rhodobacterales	0	0.01226	0.00411	0.0389	0.12847	0.0121	0.10213	0.03059	0.01982	0.02811	0	0.04918
d__Bacteria|p__Proteobacteria|c__Alphaproteobacteria|o__Rhodobacterales|f__Rhodobacteraceae	0	0.01226	0.00411	0.0389	0.12847	0.0121	0.10213	0.03059	0.01982	0.02811	0	0.04918
d__Bacteria|p__Proteobacteria|c__Alphaproteobacteria|o__Rhodobacterales|f__Rhodobacteraceae|g__Paracoccus	0	0.01226	0	0.0389	0.12847	0.0121	0.10213	0.03059	0.01982	0.02811	0	0.04918
d__Bacteria|p__Proteobacteria|c__Alphaproteobacteria|o__Rhodobacterales|f__Rhodobacteraceae|g__Paracoccus|s__Paracoccus_aminophilus	0	0.01226	0	0.0389	0.07651	0	0.07774	0.03059	0.01982	0.02811	0	0.03996
d__Bacteria|p__Proteobacteria|c__Alphaproteobacteria|o__Rhodobacterales|f__Rhodobacteraceae|g__Paracoccus|s__Paracoccus_sp._G200V	0	0	0	0	0	0	0	0	0	0	0	0.00922
d__Bacteria|p__Proteobacteria|c__Alphaproteobacteria|o__Rhodobacterales|f__Rhodobacteraceae|g__Paracoccus|s__Paracoccus_sp._Lor58	0	0	0	0	0	0	0	0	0	0	0	0
d__Bacteria|p__Proteobacteria|c__Alphaproteobacteria|o__Rhodobacterales|f__Rhodobacteraceae|g__Paracoccus|s__Paracoccus_sp._MBIC4036	0	0	0	0	0.01732	0	0	0	0	0	0	0
d__Bacteria|p__Proteobacteria|c__Alphaproteobacteria|o__Rhodobacterales|f__Rhodobacteraceae|g__Paracoccus|s__Paracoccus_sp._ZSGR3	0	0	0	0	0.03464	0.0121	0.02439	0	0	0	0	0
d__Bacteria|p__Proteobacteria|c__Alphaproteobacteria|o__Rhodobacterales|f__Rhodobacteraceae|g__Rhodobacter	0	0	0.00411	0	0	0	0	0	0	0	0	0
d__Bacteria|p__Proteobacteria|c__Alphaproteobacteria|o__Rhodobacterales|f__Rhodobacteraceae|g__Rhodobacter|s__Rhodobacter_blasticus	0	0	0.00411	0	0	0	0	0	0	0	0	0
d__Bacteria|p__Proteobacteria|c__Alphaproteobacteria|o__Rhodospirillales	0.00434	0.24989	0.01508	0.01646	0.05774	0	0.01677	0.01165	0.06098	0.00937	0	0.01383
d__Bacteria|p__Proteobacteria|c__Alphaproteobacteria|o__Rhodospirillales|f__Acetobacteraceae	0	0	0	0.01347	0.05774	0	0.01677	0.01165	0.0061	0.00937	0	0.01383
d__Bacteria|p__Proteobacteria|c__Alphaproteobacteria|o__Rhodospirillales|f__Acetobacteraceae|g__Roseomonas	0	0	0	0.01347	0.05774	0	0.01677	0.01165	0.0061	0.00937	0	0.01383
d__Bacteria|p__Proteobacteria|c__Alphaproteobacteria|o__Rhodospirillales|f__Acetobacteraceae|g__Roseomonas|s__Roseomonas_sp._S-NB-12	0	0	0	0.01347	0.05774	0	0.01677	0.01165	0.0061	0.00937	0	0.01383
d__Bacteria|p__Proteobacteria|c__Alphaproteobacteria|o__Rhodospirillales|f__Rhodospirillaceae	0.00434	0.24989	0.01508	0.00299	0	0	0	0	0.05488	0	0	0
d__Bacteria|p__Proteobacteria|c__Alphaproteobacteria|o__Rhodospirillales|f__Rhodospirillaceae|g__Insolitispirillum	0	0	0.00274	0	0	0	0	0	0	0	0	0
d__Bacteria|p__Proteobacteria|c__Alphaproteobacteria|o__Rhodospirillales|f__Rhodospirillaceae|g__Insolitispirillum|s__uncultured_Insolitispirillum_sp.	0	0	0.00274	0	0	0	0	0	0	0	0	0
d__Bacteria|p__Proteobacteria|c__Alphaproteobacteria|o__Rhodospirillales|f__Rhodospirillaceae|g__Thalassospira	0.00434	0.24989	0.01234	0.00299	0	0	0	0	0.05488	0	0	0
d__Bacteria|p__Proteobacteria|c__Alphaproteobacteria|o__Rhodospirillales|f__Rhodospirillaceae|g__Thalassospira|s__uncultured_Thalassospira_sp.	0.00434	0.24989	0.01234	0.00299	0	0	0	0	0.05488	0	0	0
d__Bacteria|p__Proteobacteria|c__Alphaproteobacteria|o__Rickettsiales	0	0	0	0	0	0.00605	0.00915	0.01165	0	0	0.00616	0.00307
d__Bacteria|p__Proteobacteria|c__Alphaproteobacteria|o__Rickettsiales|f__Mitochondria	0	0	0	0	0	0.00605	0.00915	0.01165	0	0	0.00616	0.00307
d__Bacteria|p__Proteobacteria|c__Alphaproteobacteria|o__Rickettsiales|f__Mitochondria|g__Mitochondria_unclassified	0	0	0	0	0	0.00605	0.00915	0.01165	0	0	0.00616	0.00307
d__Bacteria|p__Proteobacteria|c__Alphaproteobacteria|o__Rickettsiales|f__Mitochondria|g__Mitochondria_unclassified|s__Mitochondria_unclassified	0	0	0	0	0	0.00605	0.00915	0.01165	0	0	0.00616	0.00307
d__Bacteria|p__Proteobacteria|c__Alphaproteobacteria|o__Sphingomonadales	0.01159	0	0	0.01496	0.0332	0	0.01219	0.0335	0.02134	0.0203	0	0.00615
d__Bacteria|p__Proteobacteria|c__Alphaproteobacteria|o__Sphingomonadales|f__Sphingomonadaceae	0.01159	0	0	0.01496	0.0332	0	0.01219	0.0335	0.02134	0.0203	0	0.00615
d__Bacteria|p__Proteobacteria|c__Alphaproteobacteria|o__Sphingomonadales|f__Sphingomonadaceae|g__Novosphingobium	0.00869	0	0	0	0.00866	0	0	0.00437	0.0061	0	0	0
d__Bacteria|p__Proteobacteria|c__Alphaproteobacteria|o__Sphingomonadales|f__Sphingomonadaceae|g__Novosphingobium|s__Novosphingobium_endophyticum	0	0	0	0	0.00866	0	0	0.00437	0.0061	0	0	0
d__Bacteria|p__Proteobacteria|c__Alphaproteobacteria|o__Sphingomonadales|f__Sphingomonadaceae|g__Novosphingobium|s__Novosphingobium_unclassified	0.00869	0	0	0	0	0	0	0	0	0	0	0
d__Bacteria|p__Proteobacteria|c__Alphaproteobacteria|o__Sphingomonadales|f__Sphingomonadaceae|g__Sphingobium	0	0	0	0	0	0	0	0.01165	0.00762	0.00625	0	0
d__Bacteria|p__Proteobacteria|c__Alphaproteobacteria|o__Sphingomonadales|f__Sphingomonadaceae|g__Sphingobium|s__Sphingobium_xenophagum	0	0	0	0	0	0	0	0.01165	0.00762	0.00625	0	0
d__Bacteria|p__Proteobacteria|c__Alphaproteobacteria|o__Sphingomonadales|f__Sphingomonadaceae|g__Sphingomonas	0.0029	0	0	0.01496	0.02454	0	0.01219	0.01748	0.00762	0.01405	0	0.00615
d__Bacteria|p__Proteobacteria|c__Alphaproteobacteria|o__Sphingomonadales|f__Sphingomonadaceae|g__Sphingomonas|s__Sphingomonas_sp._Gossyppi_A5.1	0	0	0	0	0	0	0.01219	0	0.00762	0	0	0
d__Bacteria|p__Proteobacteria|c__Alphaproteobacteria|o__Sphingomonadales|f__Sphingomonadaceae|g__Sphingomonas|s__Sphingomonas_sp._Sph11	0	0	0	0.01496	0.02454	0	0	0.01748	0	0.01405	0	0
d__Bacteria|p__Proteobacteria|c__Alphaproteobacteria|o__Sphingomonadales|f__Sphingomonadaceae|g__Sphingomonas|s__Sphingomonas_unclassified	0	0	0	0	0	0	0	0	0	0	0	0.00615
d__Bacteria|p__Proteobacteria|c__Alphaproteobacteria|o__Sphingomonadales|f__Sphingomonadaceae|g__Sphingomonas|s__uncultured_Sphingomonas_sp.	0.0029	0	0	0	0	0	0	0	0	0	0	0
d__Bacteria|p__Proteobacteria|c__Betaproteobacteria	0.01737	0.10578	0.1083	0.0823	0.10249	0.09527	0.02744	0.06846	0.05183	0.09994	0.08619	0.09837
d__Bacteria|p__Proteobacteria|c__Betaproteobacteria|o__Burkholderiales	0.01737	0.00613	0	0	0.00722	0	0	0.0102	0	0.00781	0	0
d__Bacteria|p__Proteobacteria|c__Betaproteobacteria|o__Burkholderiales|f__Burkholderiales_unclassified	0	0.00613	0	0	0.00722	0	0	0.0102	0	0.00781	0	0
d__Bacteria|p__Proteobacteria|c__Betaproteobacteria|o__Burkholderiales|f__Burkholderiales_unclassified|g__Burkholderiales_unclassified	0	0.00613	0	0	0.00722	0	0	0.0102	0	0.00781	0	0
d__Bacteria|p__Proteobacteria|c__Betaproteobacteria|o__Burkholderiales|f__Burkholderiales_unclassified|g__Burkholderiales_unclassified|s__Burkholderiales_unclassified	0	0.00613	0	0	0.00722	0	0	0.0102	0	0.00781	0	0
d__Bacteria|p__Proteobacteria|c__Betaproteobacteria|o__Burkholderiales|f__Comamonadaceae	0.01737	0	0	0	0	0	0	0	0	0	0	0
d__Bacteria|p__Proteobacteria|c__Betaproteobacteria|o__Burkholderiales|f__Comamonadaceae|g__Acidovorax	0.01737	0	0	0	0	0	0	0	0	0	0	0
d__Bacteria|p__Proteobacteria|c__Betaproteobacteria|o__Burkholderiales|f__Comamonadaceae|g__Acidovorax|s__Acidovorax_sp.	0.01737	0	0	0	0	0	0	0	0	0	0	0
d__Bacteria|p__Proteobacteria|c__Betaproteobacteria|o__Neisseriales	0	0.09965	0.1083	0.0823	0.09527	0.09527	0.02744	0.05826	0.05183	0.09213	0.08619	0.09837
d__Bacteria|p__Proteobacteria|c__Betaproteobacteria|o__Neisseriales|f__Neisseriaceae	0	0.09965	0.1083	0.0823	0.09527	0.09527	0.02744	0.05826	0.05183	0.09213	0.08619	0.09837
d__Bacteria|p__Proteobacteria|c__Betaproteobacteria|o__Neisseriales|f__Neisseriaceae|g__Neisseria	0	0.09965	0.1083	0.0823	0.09527	0.09527	0.02744	0.05826	0.05183	0.09213	0.08619	0.09837
d__Bacteria|p__Proteobacteria|c__Betaproteobacteria|o__Neisseriales|f__Neisseriaceae|g__Neisseria|s__Neisseria_sp._10022	0	0.09965	0.1083	0.0823	0.09527	0.09527	0.02744	0.05826	0.05183	0.09213	0.08619	0.09837
d__Bacteria|p__Proteobacteria|c__Deltaproteobacteria	0.0029	0.07206	0.0233	0.05986	0.00722	0.00302	0	0	0.00457	0	0.00308	0
d__Bacteria|p__Proteobacteria|c__Deltaproteobacteria|o__Desulfovibrionales	0.0029	0.07206	0.0233	0.05986	0.00722	0.00302	0	0	0.00457	0	0.00308	0
d__Bacteria|p__Proteobacteria|c__Deltaproteobacteria|o__Desulfovibrionales|f__Desulfovibrionaceae	0.0029	0.07206	0.0233	0.05986	0.00722	0.00302	0	0	0.00457	0	0.00308	0
d__Bacteria|p__Proteobacteria|c__Deltaproteobacteria|o__Desulfovibrionales|f__Desulfovibrionaceae|g__Desulfovibrio	0.0029	0.07206	0.0233	0.05986	0.00722	0.00302	0	0	0.00457	0	0.00308	0
d__Bacteria|p__Proteobacteria|c__Deltaproteobacteria|o__Desulfovibrionales|f__Desulfovibrionaceae|g__Desulfovibrio|s__Desulfovibrio_sp.	0	0	0	0	0	0	0	0	0	0	0	0
d__Bacteria|p__Proteobacteria|c__Deltaproteobacteria|o__Desulfovibrionales|f__Desulfovibrionaceae|g__Desulfovibrio|s__Desulfovibrio_sp._ABHU1SB	0	0.03066	0.0233	0.04639	0	0	0	0	0	0	0	0
d__Bacteria|p__Proteobacteria|c__Deltaproteobacteria|o__Desulfovibrionales|f__Desulfovibrionaceae|g__Desulfovibrio|s__Desulfovibrio_sp._ABHU1SBfatS	0	0.03373	0	0	0	0	0	0	0	0	0	0
d__Bacteria|p__Proteobacteria|c__Deltaproteobacteria|o__Desulfovibrionales|f__Desulfovibrionaceae|g__Desulfovibrio|s__uncultured_Desulfovibrio_sp.	0.0029	0.00767	0	0.01347	0.00722	0.00302	0	0	0.00457	0	0.00308	0
d__Bacteria|p__Proteobacteria|c__Gammaproteobacteria	1.22464	1.89488	3.05971	1.89436	1.35254	1.84193	1.39776	2.51108	1.59458	1.84879	1.45453	1.43865
d__Bacteria|p__Proteobacteria|c__Gammaproteobacteria|o__Aeromonadales	0.01158	0	0	0	0	0	0	0	0	0	0	0
d__Bacteria|p__Proteobacteria|c__Gammaproteobacteria|o__Aeromonadales|f__Aeromonadaceae	0.01158	0	0	0	0	0	0	0	0	0	0	0
d__Bacteria|p__Proteobacteria|c__Gammaproteobacteria|o__Aeromonadales|f__Aeromonadaceae|g__Aeromonas	0.01158	0	0	0	0	0	0	0	0	0	0	0
d__Bacteria|p__Proteobacteria|c__Gammaproteobacteria|o__Aeromonadales|f__Aeromonadaceae|g__Aeromonas|s__Aeromonas_sp._VKM_B-2261	0.01158	0	0	0	0	0	0	0	0	0	0	0
d__Bacteria|p__Proteobacteria|c__Gammaproteobacteria|o__Aeromonadales|f__Succinivibrionaceae	0	0	0	0	0	0	0	0	0	0	0	0
d__Bacteria|p__Proteobacteria|c__Gammaproteobacteria|o__Aeromonadales|f__Succinivibrionaceae|g__Anaerobiospirillum	0	0	0	0	0	0	0	0	0	0	0	0
d__Bacteria|p__Proteobacteria|c__Gammaproteobacteria|o__Aeromonadales|f__Succinivibrionaceae|g__Anaerobiospirillum|s__Anaerobiospirillum_succiniciproducens	0	0	0	0	0	0	0	0	0	0	0	0
d__Bacteria|p__Proteobacteria|c__Gammaproteobacteria|o__Burkholderiales	0.08975	0.15637	0.07951	0.0823	0.07217	0.0363	0.0442	0.06118	0.1738	0.05934	0.06773	0.13219
d__Bacteria|p__Proteobacteria|c__Gammaproteobacteria|o__Burkholderiales|f__Alcaligenaceae	0	0	0	0	0	0	0	0.00874	0.0061	0.00468	0	0.00461
d__Bacteria|p__Proteobacteria|c__Gammaproteobacteria|o__Burkholderiales|f__Alcaligenaceae|g__Alcaligenes	0	0	0	0	0	0	0	0	0	0	0	0.00461
d__Bacteria|p__Proteobacteria|c__Gammaproteobacteria|o__Burkholderiales|f__Alcaligenaceae|g__Alcaligenes|s__Alcaligenes_unclassified	0	0	0	0	0	0	0	0	0	0	0	0.00461
d__Bacteria|p__Proteobacteria|c__Gammaproteobacteria|o__Burkholderiales|f__Alcaligenaceae|g__Oligella	0	0	0	0	0	0	0	0.00874	0.0061	0.00468	0	0
d__Bacteria|p__Proteobacteria|c__Gammaproteobacteria|o__Burkholderiales|f__Alcaligenaceae|g__Oligella|s__Oligella_unclassified	0	0	0	0	0	0	0	0.00874	0.0061	0.00468	0	0
d__Bacteria|p__Proteobacteria|c__Gammaproteobacteria|o__Burkholderiales|f__Burkholderiaceae	0.00579	0.03373	0.04524	0.03741	0.02598	0.01815	0.03658	0.03059	0.01677	0.02655	0.04618	0.00769
d__Bacteria|p__Proteobacteria|c__Gammaproteobacteria|o__Burkholderiales|f__Burkholderiaceae|g__Burkholderia-Caballeronia-Paraburkholderia	0	0	0.01097	0	0	0	0	0.0102	0.0061	0	0	0
d__Bacteria|p__Proteobacteria|c__Gammaproteobacteria|o__Burkholderiales|f__Burkholderiaceae|g__Burkholderia-Caballeronia-Paraburkholderia|s__Burkholderia-Caballeronia-Paraburkholderia_unclassified	0	0	0.01097	0	0	0	0	0.0102	0.0061	0	0	0
d__Bacteria|p__Proteobacteria|c__Gammaproteobacteria|o__Burkholderiales|f__Burkholderiaceae|g__Ralstonia	0.00579	0.03373	0.03427	0.03741	0.02598	0.01815	0.03658	0.02039	0.01067	0.02655	0.04618	0.00769
d__Bacteria|p__Proteobacteria|c__Gammaproteobacteria|o__Burkholderiales|f__Burkholderiaceae|g__Ralstonia|s__Ralstonia_unclassified	0.00579	0.03373	0.03427	0.03741	0.02598	0.01815	0.03658	0.02039	0.01067	0.02655	0.04618	0.00769
d__Bacteria|p__Proteobacteria|c__Gammaproteobacteria|o__Burkholderiales|f__Comamonadaceae	0	0	0	0	0.00866	0	0	0	0.0061	0	0	0
d__Bacteria|p__Proteobacteria|c__Gammaproteobacteria|o__Burkholderiales|f__Comamonadaceae|g__Aquabacterium	0	0	0	0	0.00577	0	0	0	0.0061	0	0	0
d__Bacteria|p__Proteobacteria|c__Gammaproteobacteria|o__Burkholderiales|f__Comamonadaceae|g__Aquabacterium|s__Aquabacterium_unclassified	0	0	0	0	0.00577	0	0	0	0.0061	0	0	0
d__Bacteria|p__Proteobacteria|c__Gammaproteobacteria|o__Burkholderiales|f__Comamonadaceae|g__Delftia	0	0	0	0	0.00289	0	0	0	0	0	0	0
d__Bacteria|p__Proteobacteria|c__Gammaproteobacteria|o__Burkholderiales|f__Comamonadaceae|g__Delftia|s__Delftia_unclassified	0	0	0	0	0.00289	0	0	0	0	0	0	0
d__Bacteria|p__Proteobacteria|c__Gammaproteobacteria|o__Burkholderiales|f__Oxalobacteraceae	0	0	0	0.00449	0	0	0	0.01602	0.0122	0	0	0.00769
d__Bacteria|p__Proteobacteria|c__Gammaproteobacteria|o__Burkholderiales|f__Oxalobacteraceae|g__Massilia	0	0	0	0.00449	0	0	0	0.01602	0.0122	0	0	0.00769
d__Bacteria|p__Proteobacteria|c__Gammaproteobacteria|o__Burkholderiales|f__Oxalobacteraceae|g__Massilia|s__Massilia_unclassified	0	0	0	0.00449	0	0	0	0.01602	0.0122	0	0	0.00769
d__Bacteria|p__Proteobacteria|c__Gammaproteobacteria|o__Burkholderiales|f__Rhodocyclaceae	0	0.00613	0.01508	0.01047	0	0.00454	0	0	0	0.01093	0.01231	0
d__Bacteria|p__Proteobacteria|c__Gammaproteobacteria|o__Burkholderiales|f__Rhodocyclaceae|g__Dechloromonas	0	0	0.00274	0	0	0	0	0	0	0	0	0
d__Bacteria|p__Proteobacteria|c__Gammaproteobacteria|o__Burkholderiales|f__Rhodocyclaceae|g__Dechloromonas|s__Dechloromonas_unclassified	0	0	0.00274	0	0	0	0	0	0	0	0	0
d__Bacteria|p__Proteobacteria|c__Gammaproteobacteria|o__Burkholderiales|f__Rhodocyclaceae|g__Methyloversatilis	0	0.00613	0.01234	0.01047	0	0.00454	0	0	0	0.01093	0.01231	0
d__Bacteria|p__Proteobacteria|c__Gammaproteobacteria|o__Burkholderiales|f__Rhodocyclaceae|g__Methyloversatilis|s__Methyloversatilis_unclassified	0	0.00613	0.01234	0.01047	0	0.00454	0	0	0	0.01093	0.01231	0
d__Bacteria|p__Proteobacteria|c__Gammaproteobacteria|o__Burkholderiales|f__Sutterellaceae	0.08396	0.11651	0.01919	0.02993	0.03753	0.01361	0.00762	0.00583	0.13263	0.01718	0.00924	0.1122
d__Bacteria|p__Proteobacteria|c__Gammaproteobacteria|o__Burkholderiales|f__Sutterellaceae|g__Parasutterella	0.08396	0.11651	0.01919	0.02993	0.03753	0.01361	0.00762	0.00583	0.13263	0.01718	0.00924	0.1122
d__Bacteria|p__Proteobacteria|c__Gammaproteobacteria|o__Burkholderiales|f__Sutterellaceae|g__Parasutterella|s__Parasutterella_unclassified	0.08396	0.11651	0.01919	0.02993	0.03753	0.01361	0.00762	0.00583	0.13263	0.01718	0.00924	0.1122
d__Bacteria|p__Proteobacteria|c__Gammaproteobacteria|o__Enterobacterales	0.53994	0.98731	1.66831	1.27038	0.58028	1.19014	0.7408	1.75513	0.90401	0.96187	0.61413	0.77773
d__Bacteria|p__Proteobacteria|c__Gammaproteobacteria|o__Enterobacterales|f__Enterobacteriaceae	0.47045	0.53965	1.18852	0.5686	0.2324	0.55803	0.23322	1.36332	0.23782	0.5309	0.20009	0.20289
d__Bacteria|p__Proteobacteria|c__Gammaproteobacteria|o__Enterobacterales|f__Enterobacteriaceae|g__Citrobacter	0.02171	0	0	0	0	0	0	0	0	0	0	0
d__Bacteria|p__Proteobacteria|c__Gammaproteobacteria|o__Enterobacterales|f__Enterobacteriaceae|g__Citrobacter|s__Citrobacter_koseri	0.02171	0	0	0	0	0	0	0	0	0	0	0
d__Bacteria|p__Proteobacteria|c__Gammaproteobacteria|o__Enterobacterales|f__Enterobacteriaceae|g__Citrobacter|s__uncultured_Citrobacter_sp.	0	0	0	0	0	0	0	0	0	0	0	0
d__Bacteria|p__Proteobacteria|c__Gammaproteobacteria|o__Enterobacterales|f__Enterobacteriaceae|g__Enterobacter	0.08975	0	0	0	0	0	0	0	0	0	0	0
d__Bacteria|p__Proteobacteria|c__Gammaproteobacteria|o__Enterobacterales|f__Enterobacteriaceae|g__Enterobacteriaceae_unclassified	0.16502	0	0	0.01197	0	0	0	0	0	0	0	0
d__Bacteria|p__Proteobacteria|c__Gammaproteobacteria|o__Enterobacterales|f__Enterobacteriaceae|g__Enterobacteriaceae_unclassified|s__Enterobacteriaceae_unclassified	0.16502	0	0	0.01197	0	0	0	0	0	0	0	0
d__Bacteria|p__Proteobacteria|c__Gammaproteobacteria|o__Enterobacterales|f__Enterobacteriaceae|g__Enterobacter|s__Enterobacter_sp._EMB-71	0.02606	0	0	0	0	0	0	0	0	0	0	0
d__Bacteria|p__Proteobacteria|c__Gammaproteobacteria|o__Enterobacterales|f__Enterobacteriaceae|g__Enterobacter|s__Enterobacter_sp._NJ-64	0.0304	0	0	0	0	0	0	0	0	0	0	0
d__Bacteria|p__Proteobacteria|c__Gammaproteobacteria|o__Enterobacterales|f__Enterobacteriaceae|g__Enterobacter|s__uncultured_Enterobacter_sp.	0.03329	0	0	0	0	0	0	0	0	0	0	0
d__Bacteria|p__Proteobacteria|c__Gammaproteobacteria|o__Enterobacterales|f__Enterobacteriaceae|g__Escherichia	0.14331	0	0	0	0	0	0	0	0	0	0	0
d__Bacteria|p__Proteobacteria|c__Gammaproteobacteria|o__Enterobacterales|f__Enterobacteriaceae|g__Escherichia-Shigella	0.01737	0.2315	0.01645	0.32919	0.05052	0.08015	0.13109	0.15294	0.19818	0.41535	0.10159	0.17983
d__Bacteria|p__Proteobacteria|c__Gammaproteobacteria|o__Enterobacterales|f__Enterobacteriaceae|g__Escherichia-Shigella|s__Escherichia-Shigella_unclassified	0.01737	0.2315	0.01645	0.32919	0.05052	0.08015	0.13109	0.15294	0.19818	0.41535	0.10159	0.17983
d__Bacteria|p__Proteobacteria|c__Gammaproteobacteria|o__Enterobacterales|f__Enterobacteriaceae|g__Escherichia|s__Escherichia_sp._CPD32	0.14331	0	0	0	0	0	0	0	0	0	0	0
d__Bacteria|p__Proteobacteria|c__Gammaproteobacteria|o__Enterobacterales|f__Enterobacteriaceae|g__Klebsiella	0.03329	0.30815	1.17207	0.22744	0.18188	0.47788	0.10213	1.21038	0.03964	0.11555	0.0985	0.02306
d__Bacteria|p__Proteobacteria|c__Gammaproteobacteria|o__Enterobacterales|f__Enterobacteriaceae|g__Klebsiella|s__Klebsiella_oxytoca	0.00579	0.16711	0.83621	0.14963	0.04186	0.16635	0.10213	0.45881	0.03964	0.09057	0.04925	0.02306
d__Bacteria|p__Proteobacteria|c__Gammaproteobacteria|o__Enterobacterales|f__Enterobacteriaceae|g__Klebsiella|s__Klebsiella_pneumoniae	0	0.09045	0.11652	0.06584	0.0563	0.21928	0	0.44133	0	0.02498	0	0
d__Bacteria|p__Proteobacteria|c__Gammaproteobacteria|o__Enterobacterales|f__Enterobacteriaceae|g__Klebsiella|s__Klebsiella_sp.	0	0	0.1741	0	0	0	0	0.09467	0	0	0	0
d__Bacteria|p__Proteobacteria|c__Gammaproteobacteria|o__Enterobacterales|f__Enterobacteriaceae|g__Klebsiella|s__Klebsiella_unclassified	0.0275	0.03373	0.04524	0	0.03031	0.04839	0	0.134	0	0	0.04925	0
d__Bacteria|p__Proteobacteria|c__Gammaproteobacteria|o__Enterobacterales|f__Enterobacteriaceae|g__Klebsiella|s__uncultured_Klebsiella_sp.	0	0.01686	0	0.01197	0.05341	0.04386	0	0.08157	0	0	0	0
d__Bacteria|p__Proteobacteria|c__Gammaproteobacteria|o__Enterobacterales|f__Enterobacteriaceae|g__Plesiomonas	0	0	0	0	0	0	0	0	0	0	0	0
d__Bacteria|p__Proteobacteria|c__Gammaproteobacteria|o__Enterobacterales|f__Enterobacteriaceae|g__Plesiomonas|s__Plesiomonas_unclassified	0	0	0	0	0	0	0	0	0	0	0	0
d__Bacteria|p__Proteobacteria|c__Gammaproteobacteria|o__Enterobacterales|f__Erwiniaceae	0.06949	0	0	0	0	0	0	0	0	0	0	0
d__Bacteria|p__Proteobacteria|c__Gammaproteobacteria|o__Enterobacterales|f__Erwiniaceae|g__Erwinia	0.03185	0	0	0	0	0	0	0	0	0	0	0
d__Bacteria|p__Proteobacteria|c__Gammaproteobacteria|o__Enterobacterales|f__Erwiniaceae|g__Erwinia|s__Erwinia_sp.	0.03185	0	0	0	0	0	0	0	0	0	0	0
d__Bacteria|p__Proteobacteria|c__Gammaproteobacteria|o__Enterobacterales|f__Erwiniaceae|g__Pantoea	0.03764	0	0	0	0	0	0	0	0	0	0	0
d__Bacteria|p__Proteobacteria|c__Gammaproteobacteria|o__Enterobacterales|f__Erwiniaceae|g__Pantoea|s__Pantoea_agglomerans	0.03764	0	0	0	0	0	0	0	0	0	0	0
d__Bacteria|p__Proteobacteria|c__Gammaproteobacteria|o__Enterobacterales|f__Morganellaceae	0	0	0	0	0	0	0.00457	0	0	0	0	0
d__Bacteria|p__Proteobacteria|c__Gammaproteobacteria|o__Enterobacterales|f__Morganellaceae|g__Proteus	0	0	0	0	0	0	0.00457	0	0	0	0	0
d__Bacteria|p__Proteobacteria|c__Gammaproteobacteria|o__Enterobacterales|f__Morganellaceae|g__Proteus|s__Proteus_mirabilis	0	0	0	0	0	0	0.00457	0	0	0	0	0
d__Bacteria|p__Proteobacteria|c__Gammaproteobacteria|o__Enterobacterales|f__Pasteurellaceae	0	0.44766	0.47979	0.70178	0.34788	0.63211	0.50301	0.39181	0.66619	0.43097	0.41404	0.57484
d__Bacteria|p__Proteobacteria|c__Gammaproteobacteria|o__Enterobacterales|f__Pasteurellaceae|g__Haemophilus	0	0	0.01234	0	0	0	0	0	0	0	0	0
d__Bacteria|p__Proteobacteria|c__Gammaproteobacteria|o__Enterobacterales|f__Pasteurellaceae|g__Haemophilus|s__Haemophilus_unclassified	0	0	0.01234	0	0	0	0	0	0	0	0	0
d__Bacteria|p__Proteobacteria|c__Gammaproteobacteria|o__Enterobacterales|f__Pasteurellaceae|g__Muribacter	0	0.1993	0.21659	0.17657	0.14435	0.29337	0.22712	0.12672	0.20733	0.14522	0.22318	0.1537
d__Bacteria|p__Proteobacteria|c__Gammaproteobacteria|o__Enterobacterales|f__Pasteurellaceae|g__Muribacter|s__Muribacter_unclassified	0	0.1993	0.21659	0.17657	0.14435	0.29337	0.22712	0.12672	0.20733	0.14522	0.22318	0.1537
d__Bacteria|p__Proteobacteria|c__Gammaproteobacteria|o__Enterobacterales|f__Pasteurellaceae|g__Rodentibacter	0	0.24836	0.25086	0.52521	0.20353	0.33874	0.27589	0.26509	0.45886	0.28575	0.19086	0.42114
d__Bacteria|p__Proteobacteria|c__Gammaproteobacteria|o__Enterobacterales|f__Pasteurellaceae|g__Rodentibacter|s__Rodentibacter_unclassified	0	0.24836	0.25086	0.52521	0.20353	0.33874	0.27589	0.26509	0.45886	0.28575	0.19086	0.42114
d__Bacteria|p__Proteobacteria|c__Gammaproteobacteria|o__Pasteurellales	0	0.12264	0.13845	0.02544	0.08516	0.20567	0.13109	0.18061	0.11738	0.15771	0.18009	0.08607
d__Bacteria|p__Proteobacteria|c__Gammaproteobacteria|o__Pasteurellales|f__Pasteurellaceae	0	0.12264	0.13845	0.02544	0.08516	0.20567	0.13109	0.18061	0.11738	0.15771	0.18009	0.08607
d__Bacteria|p__Proteobacteria|c__Gammaproteobacteria|o__Pasteurellales|f__Pasteurellaceae|g__Avibacterium	0	0.01533	0.01782	0	0	0.02722	0.02134	0.02913	0.02744	0.01718	0.02309	0
d__Bacteria|p__Proteobacteria|c__Gammaproteobacteria|o__Pasteurellales|f__Pasteurellaceae|g__Avibacterium|s__Avibacterium_gallinarum	0	0.01533	0.01782	0	0	0.02722	0.02134	0.02913	0.02744	0.01718	0.02309	0
d__Bacteria|p__Proteobacteria|c__Gammaproteobacteria|o__Pasteurellales|f__Pasteurellaceae|g__Muribacter	0	0.07052	0.12063	0.02544	0.05485	0.10586	0.07012	0.06409	0.08994	0.08588	0.11698	0.02459
d__Bacteria|p__Proteobacteria|c__Gammaproteobacteria|o__Pasteurellales|f__Pasteurellaceae|g__Muribacter|s__Muribacter_muris	0	0.07052	0.12063	0.02544	0.05485	0.10586	0.07012	0.06409	0.08994	0.08588	0.11698	0.02459
d__Bacteria|p__Proteobacteria|c__Gammaproteobacteria|o__Pasteurellales|f__Pasteurellaceae|g__Pasteurellaceae_unclassified	0	0.03679	0	0	0.03031	0.07259	0.03963	0.08739	0	0.05465	0.04002	0.06148
d__Bacteria|p__Proteobacteria|c__Gammaproteobacteria|o__Pasteurellales|f__Pasteurellaceae|g__Pasteurellaceae_unclassified|s__Pasteurellaceae_unclassified	0	0.03679	0	0	0.03031	0.07259	0.03963	0.08739	0	0.05465	0.04002	0.06148
d__Bacteria|p__Proteobacteria|c__Gammaproteobacteria|o__Pseudomonadales	0.06949	0.62856	1.17344	0.51624	0.61493	0.40982	0.48167	0.51416	0.39482	0.66362	0.59258	0.44266
d__Bacteria|p__Proteobacteria|c__Gammaproteobacteria|o__Pseudomonadales|f__Moraxellaceae	0.00434	0.62856	1.1282	0.51624	0.61493	0.40982	0.48167	0.50542	0.39482	0.66362	0.59258	0.44266
d__Bacteria|p__Proteobacteria|c__Gammaproteobacteria|o__Pseudomonadales|f__Moraxellaceae|g__Acinetobacter	0.00434	0.29282	0.76767	0.16759	0.30313	0.19054	0.21949	0.19955	0.33537	0.31385	0.18932	0.13987
d__Bacteria|p__Proteobacteria|c__Gammaproteobacteria|o__Pseudomonadales|f__Moraxellaceae|g__Acinetobacter|s__Acinetobacter_calcoaceticus	0	0.04446	0.09733	0	0.05774	0.0862	0.01829	0.08302	0.04268	0.07651	0.11236	0.0123
d__Bacteria|p__Proteobacteria|c__Gammaproteobacteria|o__Pseudomonadales|f__Moraxellaceae|g__Acinetobacter|s__Acinetobacter_junii	0	0	0	0	0	0	0	0	0	0	0.0077	0
d__Bacteria|p__Proteobacteria|c__Gammaproteobacteria|o__Pseudomonadales|f__Moraxellaceae|g__Acinetobacter|s__Acinetobacter_radioresistens	0	0.0046	0.53051	0.01646	0.00722	0.00907	0	0.01311	0	0.00468	0	0.00615
d__Bacteria|p__Proteobacteria|c__Gammaproteobacteria|o__Pseudomonadales|f__Moraxellaceae|g__Acinetobacter|s__Acinetobacter_sp.	0	0	0.04387	0	0	0	0	0	0	0	0	0
d__Bacteria|p__Proteobacteria|c__Gammaproteobacteria|o__Pseudomonadales|f__Moraxellaceae|g__Acinetobacter|s__Acinetobacter_sp._CNE_4	0.00434	0	0.01919	0.03142	0.06351	0.05293	0.0945	0.0335	0.02896	0	0.01847	0.0292
d__Bacteria|p__Proteobacteria|c__Gammaproteobacteria|o__Pseudomonadales|f__Moraxellaceae|g__Acinetobacter|s__Acinetobacter_sp._DSP11	0	0	0	0.07781	0.04475	0.04234	0.06859	0.05972	0.03659	0	0.05079	0.05226
d__Bacteria|p__Proteobacteria|c__Gammaproteobacteria|o__Pseudomonadales|f__Moraxellaceae|g__Acinetobacter|s__Acinetobacter_sp._India-BSP-7	0	0	0	0	0.02598	0	0	0.0102	0	0	0	0
d__Bacteria|p__Proteobacteria|c__Gammaproteobacteria|o__Pseudomonadales|f__Moraxellaceae|g__Acinetobacter|s__Acinetobacter_sp._MG-2011-22-CW	0	0.21923	0.01645	0.0419	0.10393	0	0.03811	0	0.22714	0.23266	0	0.03996
d__Bacteria|p__Proteobacteria|c__Gammaproteobacteria|o__Pseudomonadales|f__Moraxellaceae|g__Acinetobacter|s__Acinetobacter_unclassified	0	0	0	0	0	0	0	0	0	0	0	0
d__Bacteria|p__Proteobacteria|c__Gammaproteobacteria|o__Pseudomonadales|f__Moraxellaceae|g__Acinetobacter|s__uncultured_Acinetobacter_sp.	0	0.02453	0.06032	0	0	0	0	0	0	0	0	0
d__Bacteria|p__Proteobacteria|c__Gammaproteobacteria|o__Pseudomonadales|f__Moraxellaceae|g__Alkanindiges	0	0	0.00274	0	0	0	0	0	0	0	0	0
d__Bacteria|p__Proteobacteria|c__Gammaproteobacteria|o__Pseudomonadales|f__Moraxellaceae|g__Alkanindiges|s__Alkanindiges_unclassified	0	0	0.00274	0	0	0	0	0	0	0	0	0
d__Bacteria|p__Proteobacteria|c__Gammaproteobacteria|o__Pseudomonadales|f__Moraxellaceae|g__Enhydrobacter	0	0.32501	0.35505	0.34416	0.3118	0.21928	0.26218	0.30587	0.05945	0.33103	0.40326	0.29972
d__Bacteria|p__Proteobacteria|c__Gammaproteobacteria|o__Pseudomonadales|f__Moraxellaceae|g__Enhydrobacter|s__Enhydrobacter_unclassified	0	0.32501	0.35505	0.34416	0.3118	0.21928	0.26218	0.30587	0.05945	0.33103	0.40326	0.29972
d__Bacteria|p__Proteobacteria|c__Gammaproteobacteria|o__Pseudomonadales|f__Moraxellaceae|g__Moraxella	0	0.01073	0.00274	0.00449	0	0	0	0	0	0.01874	0	0.00307
d__Bacteria|p__Proteobacteria|c__Gammaproteobacteria|o__Pseudomonadales|f__Moraxellaceae|g__Moraxella|s__Moraxella_sp._feline_oral_taxon_350	0	0.01073	0.00274	0.00449	0	0	0	0	0	0.01874	0	0.00307
d__Bacteria|p__Proteobacteria|c__Gammaproteobacteria|o__Pseudomonadales|f__Pseudomonadaceae	0.06515	0	0.04524	0	0	0	0	0.00874	0	0	0	0
d__Bacteria|p__Proteobacteria|c__Gammaproteobacteria|o__Pseudomonadales|f__Pseudomonadaceae|g__Pseudomonas	0.06515	0	0.04524	0	0	0	0	0.00874	0	0	0	0
d__Bacteria|p__Proteobacteria|c__Gammaproteobacteria|o__Pseudomonadales|f__Pseudomonadaceae|g__Pseudomonas|s__Pseudomonas_graminis	0.02027	0	0	0	0	0	0	0	0	0	0	0
d__Bacteria|p__Proteobacteria|c__Gammaproteobacteria|o__Pseudomonadales|f__Pseudomonadaceae|g__Pseudomonas|s__Pseudomonas_monteilii	0	0	0.04524	0	0	0	0	0	0	0	0	0
d__Bacteria|p__Proteobacteria|c__Gammaproteobacteria|o__Pseudomonadales|f__Pseudomonadaceae|g__Pseudomonas|s__Pseudomonas_sp._CNE_19	0	0	0	0	0	0	0	0.00874	0	0	0	0
d__Bacteria|p__Proteobacteria|c__Gammaproteobacteria|o__Pseudomonadales|f__Pseudomonadaceae|g__Pseudomonas|s__Pseudomonas_sp._MG-2011-7-BJ	0.00869	0	0	0	0	0	0	0	0	0	0	0
d__Bacteria|p__Proteobacteria|c__Gammaproteobacteria|o__Pseudomonadales|f__Pseudomonadaceae|g__Pseudomonas|s__Pseudomonas_sp._SMX331	0.01013	0	0	0	0	0	0	0	0	0	0	0
d__Bacteria|p__Proteobacteria|c__Gammaproteobacteria|o__Pseudomonadales|f__Pseudomonadaceae|g__Pseudomonas|s__Pseudomonas_sp._XJ-2	0	0	0	0	0	0	0	0	0	0	0	0
d__Bacteria|p__Proteobacteria|c__Gammaproteobacteria|o__Pseudomonadales|f__Pseudomonadaceae|g__Pseudomonas|s__Pseudomonas_syringae	0.02606	0	0	0	0	0	0	0	0	0	0	0
d__Bacteria|p__Proteobacteria|c__Gammaproteobacteria|o__Vibrionales	0	0	0	0	0	0	0	0	0	0	0	0
d__Bacteria|p__Proteobacteria|c__Gammaproteobacteria|o__Vibrionales|f__Vibrionaceae	0	0	0	0	0	0	0	0	0	0	0	0
d__Bacteria|p__Proteobacteria|c__Gammaproteobacteria|o__Vibrionales|f__Vibrionaceae|g__Vibrio	0	0	0	0	0	0	0	0	0	0	0	0
d__Bacteria|p__Proteobacteria|c__Gammaproteobacteria|o__Vibrionales|f__Vibrionaceae|g__Vibrio|s__Vibrio_sp._SQS2-3	0	0	0	0	0	0	0	0	0	0	0	0
d__Bacteria|p__Proteobacteria|c__Gammaproteobacteria|o__Xanthomonadales	0.51388	0	0	0	0	0	0	0	0.00457	0.00625	0	0
d__Bacteria|p__Proteobacteria|c__Gammaproteobacteria|o__Xanthomonadales|f__Rhodanobacteraceae	0.00869	0	0	0	0	0	0	0	0	0	0	0
d__Bacteria|p__Proteobacteria|c__Gammaproteobacteria|o__Xanthomonadales|f__Rhodanobacteraceae|g__Dokdonella	0.0029	0	0	0	0	0	0	0	0	0	0	0
d__Bacteria|p__Proteobacteria|c__Gammaproteobacteria|o__Xanthomonadales|f__Rhodanobacteraceae|g__Dokdonella|s__uncultured_Dokdonella_sp.	0.0029	0	0	0	0	0	0	0	0	0	0	0
d__Bacteria|p__Proteobacteria|c__Gammaproteobacteria|o__Xanthomonadales|f__Rhodanobacteraceae|g__Rhodanobacter	0.00579	0	0	0	0	0	0	0	0	0	0	0
d__Bacteria|p__Proteobacteria|c__Gammaproteobacteria|o__Xanthomonadales|f__Rhodanobacteraceae|g__Rhodanobacter|s__Rhodanobacter_sp.	0.00579	0	0	0	0	0	0	0	0	0	0	0
d__Bacteria|p__Proteobacteria|c__Gammaproteobacteria|o__Xanthomonadales|f__Xanthomonadaceae	0.50519	0	0	0	0	0	0	0	0.00457	0.00625	0	0
d__Bacteria|p__Proteobacteria|c__Gammaproteobacteria|o__Xanthomonadales|f__Xanthomonadaceae|g__Lysobacter	0.01303	0	0	0	0	0	0	0	0	0	0	0
d__Bacteria|p__Proteobacteria|c__Gammaproteobacteria|o__Xanthomonadales|f__Xanthomonadaceae|g__Lysobacter|s__Lysobacter_sp.	0.01303	0	0	0	0	0	0	0	0	0	0	0
d__Bacteria|p__Proteobacteria|c__Gammaproteobacteria|o__Xanthomonadales|f__Xanthomonadaceae|g__Lysobacter|s__Lysobacter_unclassified	0	0	0	0	0	0	0	0	0	0	0	0
d__Bacteria|p__Proteobacteria|c__Gammaproteobacteria|o__Xanthomonadales|f__Xanthomonadaceae|g__Xanthomonas	0.49216	0	0	0	0	0	0	0	0.00457	0.00625	0	0
d__Bacteria|p__Proteobacteria|c__Gammaproteobacteria|o__Xanthomonadales|f__Xanthomonadaceae|g__Xanthomonas|s__Xanthomonas_phaseoli	0.0304	0	0	0	0	0	0	0	0	0	0	0
d__Bacteria|p__Proteobacteria|c__Gammaproteobacteria|o__Xanthomonadales|f__Xanthomonadaceae|g__Xanthomonas|s__Xanthomonas_sp.	0.46176	0	0	0	0	0	0	0	0.00457	0.00625	0	0
d__Bacteria|p__Spirochaetota	0	0.00767	0	0	0	0.00302	0	0	0.00457	0	0	0
d__Bacteria|p__Spirochaetota|c__Spirochaetia	0	0.00767	0	0	0	0.00302	0	0	0.00457	0	0	0
d__Bacteria|p__Spirochaetota|c__Spirochaetia|o__Spirochaetales	0	0.00767	0	0	0	0.00302	0	0	0.00457	0	0	0
d__Bacteria|p__Spirochaetota|c__Spirochaetia|o__Spirochaetales|f__Spirochaetaceae	0	0.00767	0	0	0	0.00302	0	0	0.00457	0	0	0
d__Bacteria|p__Spirochaetota|c__Spirochaetia|o__Spirochaetales|f__Spirochaetaceae|g__Spirochaetaceae_unclassified	0	0	0	0	0	0	0	0	0	0	0	0
d__Bacteria|p__Spirochaetota|c__Spirochaetia|o__Spirochaetales|f__Spirochaetaceae|g__Spirochaetaceae_unclassified|s__Spirochaetaceae_unclassified	0	0	0	0	0	0	0	0	0	0	0	0
d__Bacteria|p__Spirochaetota|c__Spirochaetia|o__Spirochaetales|f__Spirochaetaceae|g__Treponema	0	0.00767	0	0	0	0.00302	0	0	0.00457	0	0	0
d__Bacteria|p__Spirochaetota|c__Spirochaetia|o__Spirochaetales|f__Spirochaetaceae|g__Treponema|s__Treponema_unclassified	0	0	0	0	0	0.00302	0	0	0	0	0	0
d__Bacteria|p__Spirochaetota|c__Spirochaetia|o__Spirochaetales|f__Spirochaetaceae|g__Treponema|s__uncultured_Treponema_sp.	0	0.00767	0	0	0	0	0	0	0.00457	0	0	0
d__Bacteria|p__Synergistota	0	0	0	0	0	0	0	0	0	0	0	0
d__Bacteria|p__Synergistota|c__Synergistia	0	0	0	0	0	0	0	0	0	0	0	0
d__Bacteria|p__Synergistota|c__Synergistia|o__Synergistales	0	0	0	0	0	0	0	0	0	0	0	0
d__Bacteria|p__Synergistota|c__Synergistia|o__Synergistales|f__Synergistaceae	0	0	0	0	0	0	0	0	0	0	0	0
d__Bacteria|p__Synergistota|c__Synergistia|o__Synergistales|f__Synergistaceae|g__Synergistes	0	0	0	0	0	0	0	0	0	0	0	0
d__Bacteria|p__Synergistota|c__Synergistia|o__Synergistales|f__Synergistaceae|g__Synergistes|s__Synergistes_unclassified	0	0	0	0	0	0	0	0	0	0	0	0
d__Bacteria|p__Verrucomicrobiota	54.8268	2.18771	60.9736	1.94075	1.4767	1.44873	3.39608	1.27447	2.64951	1.32101	1.9763	2.6821
d__Bacteria|p__Verrucomicrobiota|c__Kiritimatiellae	0	0	0	0	0	0	0	0	0	0	0.00308	0.01537
d__Bacteria|p__Verrucomicrobiota|c__Kiritimatiellae|o__WCHB1-41	0	0	0	0	0	0	0	0	0	0	0.00308	0.01537
d__Bacteria|p__Verrucomicrobiota|c__Kiritimatiellae|o__WCHB1-41|f__WCHB1-41_unclassified	0	0	0	0	0	0	0	0	0	0	0.00308	0.01537
d__Bacteria|p__Verrucomicrobiota|c__Kiritimatiellae|o__WCHB1-41|f__WCHB1-41_unclassified|g__WCHB1-41_unclassified	0	0	0	0	0	0	0	0	0	0	0.00308	0.01537
d__Bacteria|p__Verrucomicrobiota|c__Kiritimatiellae|o__WCHB1-41|f__WCHB1-41_unclassified|g__WCHB1-41_unclassified|s__WCHB1-41_unclassified	0	0	0	0	0	0	0	0	0	0	0.00308	0.01537
d__Bacteria|p__Verrucomicrobiota|c__Verrucomicrobiae	54.8268	2.18771	60.9736	1.94075	1.4767	1.44873	3.39608	1.27447	2.64951	1.32101	1.97322	2.66673
d__Bacteria|p__Verrucomicrobiota|c__Verrucomicrobiae|o__Chthoniobacterales	0	0	0	0	0	0	0	0.00291	0	0	0	0
d__Bacteria|p__Verrucomicrobiota|c__Verrucomicrobiae|o__Chthoniobacterales|f__Xiphinematobacteraceae	0	0	0	0	0	0	0	0.00291	0	0	0	0
d__Bacteria|p__Verrucomicrobiota|c__Verrucomicrobiae|o__Chthoniobacterales|f__Xiphinematobacteraceae|g__Candidatus_Xiphinematobacter	0	0	0	0	0	0	0	0.00291	0	0	0	0
d__Bacteria|p__Verrucomicrobiota|c__Verrucomicrobiae|o__Chthoniobacterales|f__Xiphinematobacteraceae|g__Candidatus_Xiphinematobacter|s__Candidatus_Xiphinematobacter_unclassified	0	0	0	0	0	0	0	0.00291	0	0	0	0
d__Bacteria|p__Verrucomicrobiota|c__Verrucomicrobiae|o__Verrucomicrobiales	54.8268	2.18771	60.9736	1.94075	1.4767	1.44873	3.39608	1.27156	2.64951	1.32101	1.97322	2.66673
d__Bacteria|p__Verrucomicrobiota|c__Verrucomicrobiae|o__Verrucomicrobiales|f__Akkermansiaceae	54.8268	2.18771	60.9736	1.94075	1.4767	1.44873	3.39608	1.27156	2.64951	1.32101	1.97322	2.66673
d__Bacteria|p__Verrucomicrobiota|c__Verrucomicrobiae|o__Verrucomicrobiales|f__Akkermansiaceae|g__Akkermansia	54.8268	2.18771	60.9736	1.94075	1.4767	1.44873	3.39608	1.27156	2.64951	1.32101	1.97322	2.66673
d__Bacteria|p__Verrucomicrobiota|c__Verrucomicrobiae|o__Verrucomicrobiales|f__Akkermansiaceae|g__Akkermansia|s__Akkermansia_unclassified	54.8268	2.18771	60.9736	1.94075	1.4767	1.44873	3.39608	1.27156	2.64951	1.32101	1.97322	2.66673
d__Bacteria|p__Verrucomicrobiota|c__Verrucomicrobiae|o__Verrucomicrobiales|f__Verrucomicrobiaceae	0	0	0	0	0	0	0	0	0	0	0	0
d__Bacteria|p__Verrucomicrobiota|c__Verrucomicrobiae|o__Verrucomicrobiales|f__Verrucomicrobiaceae|g__Prosthecobacter	0	0	0	0	0	0	0	0	0	0	0	0
d__Bacteria|p__Verrucomicrobiota|c__Verrucomicrobiae|o__Verrucomicrobiales|f__Verrucomicrobiaceae|g__Prosthecobacter|s__Prosthecobacter_unclassified	0	0	0	0	0	0	0	0	0	0	0	0
d__unclassified	0.01737	0.01073	0.0096	0.01496	0.0332	0.01059	0.03201	0.04078	0.36282	0	0.02155	0.07531
d__unclassified|p__unclassified	0.01737	0.01073	0.0096	0.01496	0.0332	0.01059	0.03201	0.04078	0.36282	0	0.02155	0.07531
d__unclassified|p__unclassified|c__unclassified	0.01737	0.01073	0.0096	0.01496	0.0332	0.01059	0.03201	0.04078	0.36282	0	0.02155	0.07531
d__unclassified|p__unclassified|c__unclassified|o__unclassified	0.01737	0.01073	0.0096	0.01496	0.0332	0.01059	0.03201	0.04078	0.36282	0	0.02155	0.07531
d__unclassified|p__unclassified|c__unclassified|o__unclassified|f__unclassified	0.01737	0.01073	0.0096	0.01496	0.0332	0.01059	0.03201	0.04078	0.36282	0	0.02155	0.07531
d__unclassified|p__unclassified|c__unclassified|o__unclassified|f__unclassified|g__unclassified	0.01737	0.01073	0.0096	0.01496	0.0332	0.01059	0.03201	0.04078	0.36282	0	0.02155	0.07531
d__unclassified|p__unclassified|c__unclassified|o__unclassified|f__unclassified|g__unclassified|s__unclassified	0.01737	0.01073	0.0096	0.01496	0.0332	0.01059	0.03201	0.04078	0.36282	0	0.02155	0.07531
