# Supplementary material for: OSBPL3 Regulates Colorectal Cancer Progression by Modulating Gut Microbiota and Tumor Immune Microenvironment
Source: Research Square preprint supplement (doi:10.21203/rs.3.rs-8559173/v1), 2026-02-16
Supplement: Supplementary file 2 [file 28b8719e0d5cf6ed4edcefb1.xlsx]

## Sheet: Sheet1
Group	B	B	B	B	B	B	A	A	A	A	A	A
ASV ID	B6	B5	B4	B3	B2	B1	A6	A5	A4	A3	A2	A1
d__Bacteria	99.968	99.9593	99.6372	100	99.9785	99.9247	99.8874	99.7892	99.543	99.8934	99.9088	99.9914
d__Bacteria|p__Acidobacteriota	0	0	0	0	0	0	0	0	0	0	0	0.00572
d__Bacteria|p__Acidobacteriota|c__Blastocatellia	0	0	0	0	0	0	0	0	0	0	0	0.00572
d__Bacteria|p__Acidobacteriota|c__Blastocatellia|o__Pyrinomonadales	0	0	0	0	0	0	0	0	0	0	0	0.00572
d__Bacteria|p__Acidobacteriota|c__Blastocatellia|o__Pyrinomonadales|f__Pyrinomonadaceae	0	0	0	0	0	0	0	0	0	0	0	0.00572
d__Bacteria|p__Acidobacteriota|c__Blastocatellia|o__Pyrinomonadales|f__Pyrinomonadaceae|g__RB41	0	0	0	0	0	0	0	0	0	0	0	0.00572
d__Bacteria|p__Acidobacteriota|c__Blastocatellia|o__Pyrinomonadales|f__Pyrinomonadaceae|g__RB41|s__RB41_unclassified	0	0	0	0	0	0	0	0	0	0	0	0.00572
d__Bacteria|p__Actinobacteriota	0.79416	0.69331	0.65551	1.93311	1.19132	0.3981	1.98265	0.80383	1.27726	1.52232	1.68803	2.06933
d__Bacteria|p__Actinobacteriota|c__Actinobacteria	0.31705	0.14711	0.2622	0.13898	0.17547	0.09223	0.22311	0.17762	0.25357	0.18725	0.2913	0.16578
d__Bacteria|p__Actinobacteriota|c__Actinobacteria|o__Actinomycetales	0	0	0	0	0.00616	0	0.01048	0.00753	0	0	0.01494	0
d__Bacteria|p__Actinobacteriota|c__Actinobacteria|o__Actinomycetales|f__Actinomycetaceae	0	0	0	0	0.00616	0	0.01048	0.00753	0	0	0.01494	0
d__Bacteria|p__Actinobacteriota|c__Actinobacteria|o__Actinomycetales|f__Actinomycetaceae|g__Actinomyces	0	0	0	0	0.00616	0	0.01048	0.00753	0	0	0.01494	0
d__Bacteria|p__Actinobacteriota|c__Actinobacteria|o__Actinomycetales|f__Actinomycetaceae|g__Actinomyces|s__Actinomyces_unclassified	0	0	0	0	0.00616	0	0.01048	0.00753	0	0	0.01494	0
d__Bacteria|p__Actinobacteriota|c__Actinobacteria|o__Bifidobacteriales	0.16005	0.01165	0.10824	0.05934	0.09235	0.0123	0.03294	0.02559	0.14244	0.01218	0.11054	0.07003
d__Bacteria|p__Actinobacteriota|c__Actinobacteria|o__Bifidobacteriales|f__Bifidobacteriaceae	0.16005	0.01165	0.10824	0.05934	0.09235	0.0123	0.03294	0.02559	0.14244	0.01218	0.11054	0.07003
d__Bacteria|p__Actinobacteriota|c__Actinobacteria|o__Bifidobacteriales|f__Bifidobacteriaceae|g__Bifidobacterium	0.16005	0.01165	0.10824	0.05934	0.09235	0.0123	0.03294	0.02559	0.14244	0.01218	0.11054	0.07003
d__Bacteria|p__Actinobacteriota|c__Actinobacteria|o__Bifidobacteriales|f__Bifidobacteriaceae|g__Bifidobacterium|s__Bifidobacterium_unclassified	0.16005	0.01165	0.10824	0.05934	0.09235	0.0123	0.03294	0.02559	0.14244	0.01218	0.11054	0.07003
d__Bacteria|p__Actinobacteriota|c__Actinobacteria|o__Corynebacteriales	0.07469	0.08739	0.12805	0.03748	0.04002	0.06763	0.11381	0.08881	0.05948	0.12788	0.1464	0.03716
d__Bacteria|p__Actinobacteriota|c__Actinobacteria|o__Corynebacteriales|f__Corynebacteriaceae	0.07469	0.08739	0.12805	0.03748	0.04002	0.06763	0.11381	0.08881	0.05948	0.12788	0.1464	0.03716
d__Bacteria|p__Actinobacteriota|c__Actinobacteria|o__Corynebacteriales|f__Corynebacteriaceae|g__Corynebacterium	0.07469	0.08739	0.12805	0.03748	0.04002	0.06763	0.11381	0.08881	0.05948	0.12788	0.1464	0.03716
d__Bacteria|p__Actinobacteriota|c__Actinobacteria|o__Corynebacteriales|f__Corynebacteriaceae|g__Corynebacterium|s__Corynebacterium_unclassified	0.07469	0.08739	0.12805	0.03748	0.04002	0.06763	0.11381	0.08881	0.05948	0.12788	0.1464	0.03716
d__Bacteria|p__Actinobacteriota|c__Actinobacteria|o__Micrococcales	0.08231	0.04807	0.02591	0.04216	0.03694	0.0123	0.06588	0.05569	0.05165	0.04719	0.01942	0.05859
d__Bacteria|p__Actinobacteriota|c__Actinobacteria|o__Micrococcales|f__Bogoriellaceae	0	0	0	0	0	0	0.00299	0	0	0	0	0
d__Bacteria|p__Actinobacteriota|c__Actinobacteria|o__Micrococcales|f__Bogoriellaceae|g__Georgenia	0	0	0	0	0	0	0.00299	0	0	0	0	0
d__Bacteria|p__Actinobacteriota|c__Actinobacteria|o__Micrococcales|f__Bogoriellaceae|g__Georgenia|s__Georgenia_unclassified	0	0	0	0	0	0	0.00299	0	0	0	0	0
d__Bacteria|p__Actinobacteriota|c__Actinobacteria|o__Micrococcales|f__Brevibacteriaceae	0	0	0	0	0	0	0.00299	0	0	0	0	0
d__Bacteria|p__Actinobacteriota|c__Actinobacteria|o__Micrococcales|f__Brevibacteriaceae|g__Brevibacterium	0	0	0	0	0	0	0.00299	0	0	0	0	0
d__Bacteria|p__Actinobacteriota|c__Actinobacteria|o__Micrococcales|f__Brevibacteriaceae|g__Brevibacterium|s__Brevibacterium_unclassified	0	0	0	0	0	0	0.00299	0	0	0	0	0
d__Bacteria|p__Actinobacteriota|c__Actinobacteria|o__Micrococcales|f__Micrococcaceae	0.08231	0.04807	0.02591	0.04216	0.03694	0.0123	0.0599	0.05569	0.05165	0.04719	0.01942	0.05859
d__Bacteria|p__Actinobacteriota|c__Actinobacteria|o__Micrococcales|f__Micrococcaceae|g__Glutamicibacter	0	0	0.00457	0	0	0	0	0	0	0	0	0
d__Bacteria|p__Actinobacteriota|c__Actinobacteria|o__Micrococcales|f__Micrococcaceae|g__Glutamicibacter|s__Glutamicibacter_unclassified	0	0	0.00457	0	0	0	0	0	0	0	0	0
d__Bacteria|p__Actinobacteriota|c__Actinobacteria|o__Micrococcales|f__Micrococcaceae|g__Micrococcus	0.01067	0.01457	0	0	0	0	0.01348	0	0	0.00913	0	0
d__Bacteria|p__Actinobacteriota|c__Actinobacteria|o__Micrococcales|f__Micrococcaceae|g__Micrococcus|s__Micrococcus_unclassified	0.01067	0.01457	0	0	0	0	0.01348	0	0	0.00913	0	0
d__Bacteria|p__Actinobacteriota|c__Actinobacteria|o__Micrococcales|f__Micrococcaceae|g__Neomicrococcus	0.01219	0	0	0.00781	0.01539	0	0	0.00903	0	0.00761	0	0.01
d__Bacteria|p__Actinobacteriota|c__Actinobacteria|o__Micrococcales|f__Micrococcaceae|g__Neomicrococcus|s__Neomicrococcus_unclassified	0.01219	0	0	0.00781	0.01539	0	0	0.00903	0	0.00761	0	0.01
d__Bacteria|p__Actinobacteriota|c__Actinobacteria|o__Micrococcales|f__Micrococcaceae|g__Rothia	0.05945	0.0335	0.02134	0.03435	0.02155	0.0123	0.04642	0.04666	0.05165	0.03045	0.01942	0.04859
d__Bacteria|p__Actinobacteriota|c__Actinobacteria|o__Micrococcales|f__Micrococcaceae|g__Rothia|s__Rothia_unclassified	0.05945	0.0335	0.02134	0.03435	0.02155	0.0123	0.04642	0.04666	0.05165	0.03045	0.01942	0.04859
d__Bacteria|p__Actinobacteriota|c__Actinobacteriota	0.07317	0.16313	0.0686	0.50436	0.05695	0.03996	0.09284	0.03312	0.03913	0.1705	0.0717	0.15006
d__Bacteria|p__Actinobacteriota|c__Actinobacteriota|o__Actinomycetales	0	0	0	0	0	0	0	0	0	0.00457	0	0.00286
d__Bacteria|p__Actinobacteriota|c__Actinobacteriota|o__Actinomycetales|f__Actinomycetaceae	0	0	0	0	0	0	0	0	0	0.00457	0	0.00286
d__Bacteria|p__Actinobacteriota|c__Actinobacteriota|o__Actinomycetales|f__Actinomycetaceae|g__Actinobaculum	0	0	0	0	0	0	0	0	0	0.00457	0	0.00286
d__Bacteria|p__Actinobacteriota|c__Actinobacteriota|o__Actinomycetales|f__Actinomycetaceae|g__Actinobaculum|s__uncultured_Actinobaculum_sp.	0	0	0	0	0	0	0	0	0	0.00457	0	0.00286
d__Bacteria|p__Actinobacteriota|c__Actinobacteriota|o__Corynebacteriales	0.07317	0.16313	0.0686	0.50436	0.05695	0.03996	0.09284	0.03312	0.03913	0.16289	0.0717	0.14148
d__Bacteria|p__Actinobacteriota|c__Actinobacteriota|o__Corynebacteriales|f__Corynebacteriaceae	0.07317	0.16313	0.0686	0.50436	0.05695	0.03996	0.09284	0.03312	0.03913	0.16289	0.0717	0.14148
d__Bacteria|p__Actinobacteriota|c__Actinobacteriota|o__Corynebacteriales|f__Corynebacteriaceae|g__Corynebacterium	0.07317	0.16313	0.0686	0.50436	0.05695	0.03996	0.09284	0.03312	0.03913	0.16289	0.0717	0.14148
d__Bacteria|p__Actinobacteriota|c__Actinobacteriota|o__Corynebacteriales|f__Corynebacteriaceae|g__Corynebacterium|s__Corynebacterium_lowii	0	0.02476	0	0	0	0	0	0	0.03913	0.07916	0	0
d__Bacteria|p__Actinobacteriota|c__Actinobacteriota|o__Corynebacteriales|f__Corynebacteriaceae|g__Corynebacterium|s__Corynebacterium_mastitidis	0.07012	0.13837	0.0686	0.50436	0.05695	0.03996	0.09284	0.03312	0	0.08373	0.0717	0.14148
d__Bacteria|p__Actinobacteriota|c__Actinobacteriota|o__Corynebacteriales|f__Corynebacteriaceae|g__Corynebacterium|s__Corynebacterium_sp._Marseille-P4122	0.00305	0	0	0	0	0	0	0	0	0	0	0
d__Bacteria|p__Actinobacteriota|c__Actinobacteriota|o__Frankiales	0	0	0	0	0	0	0	0	0	0.00304	0	0
d__Bacteria|p__Actinobacteriota|c__Actinobacteriota|o__Frankiales|f__Frankiales_unclassified	0	0	0	0	0	0	0	0	0	0.00304	0	0
d__Bacteria|p__Actinobacteriota|c__Actinobacteriota|o__Frankiales|f__Frankiales_unclassified|g__Frankiales_unclassified	0	0	0	0	0	0	0	0	0	0.00304	0	0
d__Bacteria|p__Actinobacteriota|c__Actinobacteriota|o__Frankiales|f__Frankiales_unclassified|g__Frankiales_unclassified|s__Frankiales_unclassified	0	0	0	0	0	0	0	0	0	0.00304	0	0
d__Bacteria|p__Actinobacteriota|c__Actinobacteriota|o__Micrococcales	0	0	0	0	0	0	0	0	0	0	0	0.00572
d__Bacteria|p__Actinobacteriota|c__Actinobacteriota|o__Micrococcales|f__Microbacteriaceae	0	0	0	0	0	0	0	0	0	0	0	0.00572
d__Bacteria|p__Actinobacteriota|c__Actinobacteriota|o__Micrococcales|f__Microbacteriaceae|g__Curtobacterium	0	0	0	0	0	0	0	0	0	0	0	0.00572
d__Bacteria|p__Actinobacteriota|c__Actinobacteriota|o__Micrococcales|f__Microbacteriaceae|g__Curtobacterium|s__Curtobacterium_flaccumfaciens	0	0	0	0	0	0	0	0	0	0	0	0.00572
d__Bacteria|p__Actinobacteriota|c__Actinobacteriota|o__Micromonosporales	0	0	0	0	0	0	0	0	0	0	0	0
d__Bacteria|p__Actinobacteriota|c__Actinobacteriota|o__Micromonosporales|f__Micromonosporaceae	0	0	0	0	0	0	0	0	0	0	0	0
d__Bacteria|p__Actinobacteriota|c__Actinobacteriota|o__Micromonosporales|f__Micromonosporaceae|g__Actinoplanes	0	0	0	0	0	0	0	0	0	0	0	0
d__Bacteria|p__Actinobacteriota|c__Actinobacteriota|o__Micromonosporales|f__Micromonosporaceae|g__Actinoplanes|s__Actinoplanes_sp._19	0	0	0	0	0	0	0	0	0	0	0	0
d__Bacteria|p__Actinobacteriota|c__Coriobacteriia	0.40394	0.38307	0.32471	1.28977	0.9589	0.26591	1.6667	0.59309	0.98456	1.16457	1.32503	1.75349
d__Bacteria|p__Actinobacteriota|c__Coriobacteriia|o__Coriobacteriales	0.37498	0.335	0.30337	1.18359	0.89118	0.22748	1.41063	0.55847	0.77481	1.12195	1.12187	1.49339
d__Bacteria|p__Actinobacteriota|c__Coriobacteriia|o__Coriobacteriales|f__Atopobiaceae	0.04421	0.00728	0	0.00312	0	0	0.00299	0.00452	0.05009	0.00304	0	0.00572
d__Bacteria|p__Actinobacteriota|c__Coriobacteriia|o__Coriobacteriales|f__Atopobiaceae|g__Atopobium	0	0	0	0	0	0	0	0	0	0	0	0
d__Bacteria|p__Actinobacteriota|c__Coriobacteriia|o__Coriobacteriales|f__Atopobiaceae|g__Atopobium|s__Atopobium_unclassified	0	0	0	0	0	0	0	0	0	0	0	0
d__Bacteria|p__Actinobacteriota|c__Coriobacteriia|o__Coriobacteriales|f__Atopobiaceae|g__Coriobacteriaceae_UCG-002	0.0061	0.00437	0	0.00312	0	0	0	0	0	0.00304	0	0
d__Bacteria|p__Actinobacteriota|c__Coriobacteriia|o__Coriobacteriales|f__Atopobiaceae|g__Coriobacteriaceae_UCG-002|s__Coriobacteriaceae_UCG-002_unclassified	0.0061	0.00437	0	0.00312	0	0	0	0	0	0.00304	0	0
d__Bacteria|p__Actinobacteriota|c__Coriobacteriia|o__Coriobacteriales|f__Atopobiaceae|g__Olsenella	0.03811	0.00291	0	0	0	0	0.00299	0.00452	0.05009	0	0	0.00572
d__Bacteria|p__Actinobacteriota|c__Coriobacteriia|o__Coriobacteriales|f__Atopobiaceae|g__Olsenella|s__Olsenella_scatoligenes	0.03811	0	0	0	0	0	0	0	0.04539	0	0	0
d__Bacteria|p__Actinobacteriota|c__Coriobacteriia|o__Coriobacteriales|f__Atopobiaceae|g__Olsenella|s__Olsenella_sp._1183	0	0.00291	0	0	0	0	0	0	0	0	0	0
d__Bacteria|p__Actinobacteriota|c__Coriobacteriia|o__Coriobacteriales|f__Atopobiaceae|g__Olsenella|s__Olsenella_sp._N13-17	0	0	0	0	0	0	0.00299	0.00452	0.0047	0	0	0.00572
d__Bacteria|p__Actinobacteriota|c__Coriobacteriia|o__Coriobacteriales|f__Coriobacteriaceae	0.02286	0	0.02134	0	0	0.00461	0.00299	0.00903	0.02191	0	0.01793	0.01429
d__Bacteria|p__Actinobacteriota|c__Coriobacteriia|o__Coriobacteriales|f__Coriobacteriaceae|g__Collinsella	0.02286	0	0.02134	0	0	0.00461	0.00299	0.00903	0.02191	0	0.01793	0.01429
d__Bacteria|p__Actinobacteriota|c__Coriobacteriia|o__Coriobacteriales|f__Coriobacteriaceae|g__Collinsella|s__Collinsella_aerofaciens	0.02286	0	0	0	0	0	0	0.00301	0.02191	0	0	0
d__Bacteria|p__Actinobacteriota|c__Coriobacteriia|o__Coriobacteriales|f__Coriobacteriaceae|g__Collinsella|s__Collinsella_unclassified	0	0	0.02134	0	0	0.00461	0	0	0	0	0.01793	0.01429
d__Bacteria|p__Actinobacteriota|c__Coriobacteriia|o__Coriobacteriales|f__Coriobacteriaceae|g__Collinsella|s__Collinsella_vaginalis	0	0	0	0	0	0	0.00299	0.00602	0	0	0	0
d__Bacteria|p__Actinobacteriota|c__Coriobacteriia|o__Coriobacteriales|f__Eggerthellaceae	0.30791	0.32772	0.28203	1.18047	0.89118	0.22287	1.40465	0.54492	0.70281	1.11891	1.10394	1.47338
d__Bacteria|p__Actinobacteriota|c__Coriobacteriia|o__Coriobacteriales|f__Eggerthellaceae|g__Eggerthella	0	0.00291	0	0	0	0	0	0	0	0	0	0
d__Bacteria|p__Actinobacteriota|c__Coriobacteriia|o__Coriobacteriales|f__Eggerthellaceae|g__Eggerthella|s__Eggerthella_unclassified	0	0.00291	0	0	0	0	0	0	0	0	0	0
d__Bacteria|p__Actinobacteriota|c__Coriobacteriia|o__Coriobacteriales|f__Eggerthellaceae|g__Enterorhabdus	0.30181	0.32481	0.28203	1.13675	0.88502	0.22287	1.27886	0.51331	0.62768	1.08542	0.96651	1.17613
d__Bacteria|p__Actinobacteriota|c__Coriobacteriia|o__Coriobacteriales|f__Eggerthellaceae|g__Enterorhabdus|s__Enterorhabdus_unclassified	0.30181	0.32481	0.28203	1.13675	0.88502	0.22287	1.27886	0.51331	0.62768	1.08542	0.96651	1.17613
d__Bacteria|p__Actinobacteriota|c__Coriobacteriia|o__Coriobacteriales|f__Eggerthellaceae|g__Gordonibacter	0	0	0	0	0	0	0	0	0	0.00761	0	0
d__Bacteria|p__Actinobacteriota|c__Coriobacteriia|o__Coriobacteriales|f__Eggerthellaceae|g__Gordonibacter|s__Gordonibacter_unclassified	0	0	0	0	0	0	0	0	0	0.00761	0	0
d__Bacteria|p__Actinobacteriota|c__Coriobacteriia|o__Coriobacteriales|f__Eggerthellaceae|g__Parvibacter	0.0061	0	0	0.04372	0.00616	0	0.12579	0.03161	0.07513	0.02588	0.13743	0.29725
d__Bacteria|p__Actinobacteriota|c__Coriobacteriia|o__Coriobacteriales|f__Eggerthellaceae|g__Parvibacter|s__Parvibacter_unclassified	0.0061	0	0	0.04372	0.00616	0	0.12579	0.03161	0.07513	0.02588	0.13743	0.29725
d__Bacteria|p__Actinobacteriota|c__Coriobacteriia|o__Eggerthellales	0.02896	0.04807	0.02134	0.10618	0.06772	0.03843	0.25607	0.03462	0.20975	0.04262	0.20316	0.2601
d__Bacteria|p__Actinobacteriota|c__Coriobacteriia|o__Eggerthellales|f__Eggerthellaceae	0.02896	0.04807	0.02134	0.10618	0.06772	0.03843	0.25607	0.03462	0.20975	0.04262	0.20316	0.2601
d__Bacteria|p__Actinobacteriota|c__Coriobacteriia|o__Eggerthellales|f__Eggerthellaceae|g__Enterorhabdus	0.02896	0.04807	0.02134	0.10618	0.06772	0.03843	0.25607	0.03462	0.20975	0.04262	0.20316	0.2601
d__Bacteria|p__Actinobacteriota|c__Coriobacteriia|o__Eggerthellales|f__Eggerthellaceae|g__Enterorhabdus|s__Enterorhabdus_muris	0.01372	0.01748	0	0.07807	0.02001	0.01537	0.15274	0.01957	0.20192	0.02892	0.05079	0.19007
d__Bacteria|p__Actinobacteriota|c__Coriobacteriia|o__Eggerthellales|f__Eggerthellaceae|g__Enterorhabdus|s__Enterorhabdus_sp.	0.01524	0.03059	0.02134	0.02811	0.04771	0.02306	0.10333	0.01505	0.00783	0.0137	0.15237	0.07003
d__Bacteria|p__Bacteroidota	11.3375	26.1652	57.1795	12.4996	12.8398	60.225	40.5403	53.9884	47.4549	43.0163	25.676	54.6024
d__Bacteria|p__Bacteroidota|c__Bacteroidia	11.3193	26.139	57.1795	12.4996	12.8398	60.2112	40.5403	53.9793	47.4439	42.9889	25.6461	54.6024
d__Bacteria|p__Bacteroidota|c__Bacteroidia|o__Bacteroidales	11.2308	26.1128	57.1596	12.4575	12.8198	60.139	40.4549	53.9221	47.3844	42.9219	25.6192	54.5523
d__Bacteria|p__Bacteroidota|c__Bacteroidia|o__Bacteroidales|f__Bacteroidaceae	1.11576	7.03507	15.426	0.584	1.54226	19.4049	1.2519	3.39601	6.74014	3.86365	1.1159	1.67775
d__Bacteria|p__Bacteroidota|c__Bacteroidia|o__Bacteroidales|f__Bacteroidaceae|g__Anaerorhabdus	0	0	0.00457	0	0	0.00307	0.00299	0	0	0	0.00598	0.00572
d__Bacteria|p__Bacteroidota|c__Bacteroidia|o__Bacteroidales|f__Bacteroidaceae|g__Anaerorhabdus|s__uncultured_Anaerorhabdus_sp.	0	0	0.00457	0	0	0.00307	0.00299	0	0	0	0.00598	0.00572
d__Bacteria|p__Bacteroidota|c__Bacteroidia|o__Bacteroidales|f__Bacteroidaceae|g__Bacteroidaceae_unclassified	0	0	0	0	0	0	0	0	0	0	0	0
d__Bacteria|p__Bacteroidota|c__Bacteroidia|o__Bacteroidales|f__Bacteroidaceae|g__Bacteroidaceae_unclassified|s__Bacteroidaceae_unclassified	0	0	0	0	0	0	0	0	0	0	0	0
d__Bacteria|p__Bacteroidota|c__Bacteroidia|o__Bacteroidales|f__Bacteroidaceae|g__Bacteroides	1.11576	7.03507	15.4214	0.584	1.54226	19.4018	1.24891	3.39601	6.74014	3.86365	1.10992	1.67203
d__Bacteria|p__Bacteroidota|c__Bacteroidia|o__Bacteroidales|f__Bacteroidaceae|g__Bacteroides|s__Bacteroides_acidifaciens	0.73927	5.44599	12.2765	0.27794	1.1236	15.2027	0.74875	2.53346	5.01049	2.84066	0.69613	0.99893
d__Bacteria|p__Bacteroidota|c__Bacteroidia|o__Bacteroidales|f__Bacteroidaceae|g__Bacteroides|s__Bacteroides_barnesiae	0.02896	0	0.00305	0.02655	0	0.01691	0	0	0.02348	0	0	0.00286
d__Bacteria|p__Bacteroidota|c__Bacteroidia|o__Bacteroidales|f__Bacteroidaceae|g__Bacteroides|s__Bacteroides_caecigallinarum	0.01829	0.01457	0	0	0.01231	0	0.01348	0.00903	0.03287	0.01522	0.01643	0.01858
d__Bacteria|p__Bacteroidota|c__Bacteroidia|o__Bacteroidales|f__Bacteroidaceae|g__Bacteroides|s__Bacteroides_caecimuris	0	0	0.00457	0	0	0	0	0	0	0	0	0.00857
d__Bacteria|p__Bacteroidota|c__Bacteroidia|o__Bacteroidales|f__Bacteroidaceae|g__Bacteroides|s__Bacteroides_coprophilus	0	0	0	0.00937	0	0	0	0	0	0	0	0
d__Bacteria|p__Bacteroidota|c__Bacteroidia|o__Bacteroidales|f__Bacteroidaceae|g__Bacteroides|s__Bacteroides_finegoldii	0.06402	0.01165	0.04726	0.13585	0.08312	0.03228	0.09135	0.09935	0.06261	0.00609	0.04332	0.13433
d__Bacteria|p__Bacteroidota|c__Bacteroidia|o__Bacteroidales|f__Bacteroidaceae|g__Bacteroides|s__Bacteroides_fragilis	0	0	0	0	0	0.00769	0	0	0	0	0	0
d__Bacteria|p__Bacteroidota|c__Bacteroidia|o__Bacteroidales|f__Bacteroidaceae|g__Bacteroides|s__Bacteroides_mediterraneensis	0	0.02039	0	0	0	0.0123	0	0	0	0.02283	0	0.02287
d__Bacteria|p__Bacteroidota|c__Bacteroidia|o__Bacteroidales|f__Bacteroidaceae|g__Bacteroides|s__Bacteroides_ndongoniae	0	0	0.0122	0	0	0	0	0	0	0	0	0
d__Bacteria|p__Bacteroidota|c__Bacteroidia|o__Bacteroidales|f__Bacteroidaceae|g__Bacteroides|s__Bacteroides_rodentium	0	0	0	0	0	0	0	0	0	0	0	0
d__Bacteria|p__Bacteroidota|c__Bacteroidia|o__Bacteroidales|f__Bacteroidaceae|g__Bacteroides|s__Bacteroides_sp.	0	0	0	0	0	0.14141	0	0	0	0	0	0
d__Bacteria|p__Bacteroidota|c__Bacteroidia|o__Bacteroidales|f__Bacteroidaceae|g__Bacteroides|s__Bacteroides_sp._SB5	0.02591	0.02913	0.01829	0	0.02001	0	0.03145	0.02409	0.05479	0.04719	0.04481	0.06717
d__Bacteria|p__Bacteroidota|c__Bacteroidia|o__Bacteroidales|f__Bacteroidaceae|g__Bacteroides|s__Bacteroides_sp._Tilapia9	0	0	0	0	0	0	0	0	0.00939	0	0	0
d__Bacteria|p__Bacteroidota|c__Bacteroidia|o__Bacteroidales|f__Bacteroidaceae|g__Bacteroides|s__Bacteroides_sp._baku-33	0.01067	0	0	0	0	0	0.04492	0.00903	0.02035	0	0.01942	0
d__Bacteria|p__Bacteroidota|c__Bacteroidia|o__Bacteroidales|f__Bacteroidaceae|g__Bacteroides|s__Bacteroides_unclassified	0.19511	1.51334	2.96355	0.08432	0.28475	3.85945	0.28452	0.70299	1.51833	0.90578	0.23603	0.33298
d__Bacteria|p__Bacteroidota|c__Bacteroidia|o__Bacteroidales|f__Bacteroidaceae|g__Bacteroides|s__Bacteroides_uniformis	0	0	0	0	0	0.04457	0	0	0	0	0	0
d__Bacteria|p__Bacteroidota|c__Bacteroidia|o__Bacteroidales|f__Bacteroidaceae|g__Bacteroides|s__uncultured_Bacteroides_sp.	0.03353	0	0.09604	0.04997	0.01847	0.08454	0.03444	0.01806	0.00783	0.02588	0.05378	0.08574
d__Bacteria|p__Bacteroidota|c__Bacteroidia|o__Bacteroidales|f__Bacteroidales_RF16_group	0	0	0	0	0	0	0	0	0	0.00761	0.00896	0
d__Bacteria|p__Bacteroidota|c__Bacteroidia|o__Bacteroidales|f__Bacteroidales_RF16_group|g__Bacteroidales_RF16_group_unclassified	0	0	0	0	0	0	0	0	0	0.00761	0.00896	0
d__Bacteria|p__Bacteroidota|c__Bacteroidia|o__Bacteroidales|f__Bacteroidales_RF16_group|g__Bacteroidales_RF16_group_unclassified|s__Bacteroidales_RF16_group_unclassified	0	0	0	0	0	0	0	0	0	0.00761	0.00896	0
d__Bacteria|p__Bacteroidota|c__Bacteroidia|o__Bacteroidales|f__Bacteroidales_unclassified	0.01067	0.02476	0.12348	0	0.01385	0.02613	0.01797	0.22881	0.21758	0.05328	0	0.02572
d__Bacteria|p__Bacteroidota|c__Bacteroidia|o__Bacteroidales|f__Bacteroidales_unclassified|g__Bacteroidales_unclassified	0.01067	0.02476	0.12348	0	0.01385	0.02613	0.01797	0.22881	0.21758	0.05328	0	0.02572
d__Bacteria|p__Bacteroidota|c__Bacteroidia|o__Bacteroidales|f__Bacteroidales_unclassified|g__Bacteroidales_unclassified|s__Bacteroidales_unclassified	0.01067	0.02476	0.12348	0	0.01385	0.02613	0.01797	0.22881	0.21758	0.05328	0	0.02572
d__Bacteria|p__Bacteroidota|c__Bacteroidia|o__Bacteroidales|f__Barnesiellaceae	0.01677	0.01602	0.00457	0	0.00308	0	0.00749	0.04365	0.04383	0.01675	0	0.01858
d__Bacteria|p__Bacteroidota|c__Bacteroidia|o__Bacteroidales|f__Barnesiellaceae|g__Barnesiella	0.01677	0.01602	0.00457	0	0.00308	0	0.00749	0.04365	0.04383	0.01675	0	0.01858
d__Bacteria|p__Bacteroidota|c__Bacteroidia|o__Bacteroidales|f__Barnesiellaceae|g__Barnesiella|s__Barnesiella_viscericola	0	0	0	0	0	0	0	0	0	0	0	0.01858
d__Bacteria|p__Bacteroidota|c__Bacteroidia|o__Bacteroidales|f__Barnesiellaceae|g__Barnesiella|s__uncultured_Barnesiella_sp.	0.01677	0.01602	0.00457	0	0.00308	0	0.00749	0.04365	0.04383	0.01675	0	0
d__Bacteria|p__Bacteroidota|c__Bacteroidia|o__Bacteroidales|f__Marinifilaceae	0.15852	0.21411	0.32471	1.74417	0.1924	0.05533	0.76672	0.20021	0.12366	0.12788	0.83206	0.37585
d__Bacteria|p__Bacteroidota|c__Bacteroidia|o__Bacteroidales|f__Marinifilaceae|g__Odoribacter	0.15852	0.21411	0.32471	1.74417	0.1924	0.05533	0.76672	0.20021	0.12366	0.12788	0.83206	0.37585
d__Bacteria|p__Bacteroidota|c__Bacteroidia|o__Bacteroidales|f__Marinifilaceae|g__Odoribacter|s__Odoribacter_unclassified	0.15852	0.21411	0.32471	1.74417	0.1924	0.05533	0.76672	0.20021	0.12366	0.12788	0.83206	0.37585
d__Bacteria|p__Bacteroidota|c__Bacteroidia|o__Bacteroidales|f__Muribaculaceae	7.42169	12.4097	31.3795	5.46985	8.34848	38.3532	36.0074	46.2164	37.3008	35.8736	20.2907	50.5795
d__Bacteria|p__Bacteroidota|c__Bacteroidia|o__Bacteroidales|f__Muribaculaceae|g__Duncaniella	0.1006	0.0568	0.67838	0.0203	0.06465	0.86073	0.36988	0.26494	0.27393	0.26641	0.33312	0.44016
d__Bacteria|p__Bacteroidota|c__Bacteroidia|o__Bacteroidales|f__Muribaculaceae|g__Duncaniella|s__Duncaniella_muris	0.1006	0.0568	0.67838	0.0203	0.06465	0.86073	0.36988	0.26494	0.27393	0.26641	0.33312	0.44016
d__Bacteria|p__Bacteroidota|c__Bacteroidia|o__Bacteroidales|f__Muribaculaceae|g__Muribaculaceae_unclassified	6.44768	11.3056	26.3762	4.4502	7.49577	31.6134	30.3109	40.9447	33.458	31.7861	16.1901	42.2994
d__Bacteria|p__Bacteroidota|c__Bacteroidia|o__Bacteroidales|f__Muribaculaceae|g__Muribaculaceae_unclassified|s__Muribaculaceae_unclassified	6.44768	11.3056	26.3762	4.4502	7.49577	31.6134	30.3109	40.9447	33.458	31.7861	16.1901	42.2994
d__Bacteria|p__Bacteroidota|c__Bacteroidia|o__Bacteroidales|f__Muribaculaceae|g__Muribaculum	0.87341	0.86372	4.28526	0.78855	0.78806	5.8791	4.54191	4.82757	3.18693	3.70078	3.31332	7.45409
d__Bacteria|p__Bacteroidota|c__Bacteroidia|o__Bacteroidales|f__Muribaculaceae|g__Muribaculum|s__Muribaculum_intestinale	0.03201	0.17478	0.07927	0.26077	0.05849	0.01691	0.15424	0.20021	0.31932	0.17355	0.09262	0.34727
d__Bacteria|p__Bacteroidota|c__Bacteroidia|o__Bacteroidales|f__Muribaculaceae|g__Muribaculum|s__Muribaculum_sp.	0.8414	0.68894	4.20599	0.52778	0.72957	5.86219	4.38767	4.62736	2.86761	3.52723	3.2207	7.10682
d__Bacteria|p__Bacteroidota|c__Bacteroidia|o__Bacteroidales|f__Muribaculaceae|g__Paramuribaculum	0	0.18352	0.03964	0.2108	0	0	0.78469	0.17913	0.38193	0.12026	0.45412	0.38585
d__Bacteria|p__Bacteroidota|c__Bacteroidia|o__Bacteroidales|f__Muribaculaceae|g__Paramuribaculum|s__Paramuribaculum_intestinale	0	0.18352	0.03964	0.2108	0	0	0.78469	0.17913	0.38193	0.12026	0.45412	0.38585
d__Bacteria|p__Bacteroidota|c__Bacteroidia|o__Bacteroidales|f__Paludibacteraceae	0	0	0	0	0	0	0	0	0	0.00761	0	0
d__Bacteria|p__Bacteroidota|c__Bacteroidia|o__Bacteroidales|f__Paludibacteraceae|g__Paludibacter	0	0	0	0	0	0	0	0	0	0.00761	0	0
d__Bacteria|p__Bacteroidota|c__Bacteroidia|o__Bacteroidales|f__Paludibacteraceae|g__Paludibacter|s__uncultured_Paludibacter_sp.	0	0	0	0	0	0	0	0	0	0.00761	0	0
d__Bacteria|p__Bacteroidota|c__Bacteroidia|o__Bacteroidales|f__Porphyromonadaceae	0.04573	0.0335	0.05793	0.03904	0.02924	0.07992	0.03744	0.03914	0.0407	0.04263	0.08067	0.04144
d__Bacteria|p__Bacteroidota|c__Bacteroidia|o__Bacteroidales|f__Porphyromonadaceae|g__Porphyromonadaceae_unclassified	0	0	0	0	0	0.00461	0	0	0.00313	0.00609	0	0
d__Bacteria|p__Bacteroidota|c__Bacteroidia|o__Bacteroidales|f__Porphyromonadaceae|g__Porphyromonadaceae_unclassified|s__Porphyromonadaceae_unclassified	0	0	0	0	0	0.00461	0	0	0.00313	0.00609	0	0
d__Bacteria|p__Bacteroidota|c__Bacteroidia|o__Bacteroidales|f__Porphyromonadaceae|g__Porphyromonas	0.04573	0.0335	0.05793	0.03904	0.02924	0.07531	0.03744	0.03914	0.03757	0.03654	0.08067	0.04144
d__Bacteria|p__Bacteroidota|c__Bacteroidia|o__Bacteroidales|f__Porphyromonadaceae|g__Porphyromonas|s__Porphyromonas_sp._canine_oral_taxon_281	0.04573	0.0335	0.05793	0.03904	0.02924	0.07531	0.03744	0.03914	0.03757	0.03654	0.08067	0.04144
d__Bacteria|p__Bacteroidota|c__Bacteroidia|o__Bacteroidales|f__Prevotellaceae	0.33229	0.10195	6.64665	0.089	0.09389	0.05687	0.06589	0.04817	0.07201	0.06089	0.17778	0.05002
d__Bacteria|p__Bacteroidota|c__Bacteroidia|o__Bacteroidales|f__Prevotellaceae|g__Alloprevotella	0.28504	0.04078	6.52774	0.05465	0.08158	0.04918	0.04343	0.02107	0.03444	0.03958	0.05079	0.0343
d__Bacteria|p__Bacteroidota|c__Bacteroidia|o__Bacteroidales|f__Prevotellaceae|g__Alloprevotella|s__Alloprevotella_unclassified	0.28504	0.04078	6.52774	0.05465	0.08158	0.04918	0.04343	0.02107	0.03444	0.03958	0.05079	0.0343
d__Bacteria|p__Bacteroidota|c__Bacteroidia|o__Bacteroidales|f__Prevotellaceae|g__Paraprevotella	0	0	0	0	0	0	0	0.00452	0	0.00913	0.02838	0
d__Bacteria|p__Bacteroidota|c__Bacteroidia|o__Bacteroidales|f__Prevotellaceae|g__Paraprevotella|s__Paraprevotella_unclassified	0	0	0	0	0	0	0	0.00452	0	0.00913	0.02838	0
d__Bacteria|p__Bacteroidota|c__Bacteroidia|o__Bacteroidales|f__Prevotellaceae|g__Prevotella	0	0.00291	0.03049	0	0	0	0	0	0	0	0.00598	0
d__Bacteria|p__Bacteroidota|c__Bacteroidia|o__Bacteroidales|f__Prevotellaceae|g__Prevotella_7	0	0	0.00457	0	0	0	0	0	0	0	0.01793	0
d__Bacteria|p__Bacteroidota|c__Bacteroidia|o__Bacteroidales|f__Prevotellaceae|g__Prevotella_7|s__Prevotella_7_unclassified	0	0	0.00457	0	0	0	0	0	0	0	0.01793	0
d__Bacteria|p__Bacteroidota|c__Bacteroidia|o__Bacteroidales|f__Prevotellaceae|g__Prevotella_9	0.01524	0.01893	0	0	0	0	0.01947	0	0	0	0.0239	0
d__Bacteria|p__Bacteroidota|c__Bacteroidia|o__Bacteroidales|f__Prevotellaceae|g__Prevotella_9|s__Prevotella_9_unclassified	0.01524	0.01893	0	0	0	0	0.01947	0	0	0	0.0239	0
d__Bacteria|p__Bacteroidota|c__Bacteroidia|o__Bacteroidales|f__Prevotellaceae|g__Prevotellaceae_Ga6A1_group	0.02744	0.0102	0.01982	0.01874	0	0	0	0.01505	0.03757	0	0.01793	0
d__Bacteria|p__Bacteroidota|c__Bacteroidia|o__Bacteroidales|f__Prevotellaceae|g__Prevotellaceae_Ga6A1_group|s__Prevotellaceae_Ga6A1_group_unclassified	0.02744	0.0102	0.01982	0.01874	0	0	0	0.01505	0.03757	0	0.01793	0
d__Bacteria|p__Bacteroidota|c__Bacteroidia|o__Bacteroidales|f__Prevotellaceae|g__Prevotellaceae_NK3B31_group	0.00457	0.00291	0	0	0	0	0	0	0	0	0.00598	0.01
d__Bacteria|p__Bacteroidota|c__Bacteroidia|o__Bacteroidales|f__Prevotellaceae|g__Prevotellaceae_NK3B31_group|s__Prevotellaceae_NK3B31_group_unclassified	0.00457	0.00291	0	0	0	0	0	0	0	0	0.00598	0.01
d__Bacteria|p__Bacteroidota|c__Bacteroidia|o__Bacteroidales|f__Prevotellaceae|g__Prevotellaceae_UCG-001	0	0.01602	0.01067	0.01561	0.01231	0.00769	0.00299	0.00753	0	0.00609	0.01643	0.00572
d__Bacteria|p__Bacteroidota|c__Bacteroidia|o__Bacteroidales|f__Prevotellaceae|g__Prevotellaceae_UCG-001|s__Prevotellaceae_UCG-001_unclassified	0	0.01602	0.01067	0.01561	0.01231	0.00769	0.00299	0.00753	0	0.00609	0.01643	0.00572
d__Bacteria|p__Bacteroidota|c__Bacteroidia|o__Bacteroidales|f__Prevotellaceae|g__Prevotellaceae_UCG-003	0	0.0102	0	0	0	0	0	0	0	0.00609	0.01046	0
d__Bacteria|p__Bacteroidota|c__Bacteroidia|o__Bacteroidales|f__Prevotellaceae|g__Prevotellaceae_UCG-003|s__Prevotellaceae_UCG-003_unclassified	0	0.0102	0	0	0	0	0	0	0	0.00609	0.01046	0
d__Bacteria|p__Bacteroidota|c__Bacteroidia|o__Bacteroidales|f__Prevotellaceae|g__Prevotellaceae_unclassified	0	0	0.05336	0	0	0	0	0	0	0	0	0
d__Bacteria|p__Bacteroidota|c__Bacteroidia|o__Bacteroidales|f__Prevotellaceae|g__Prevotellaceae_unclassified|s__Prevotellaceae_unclassified	0	0	0.05336	0	0	0	0	0	0	0	0	0
d__Bacteria|p__Bacteroidota|c__Bacteroidia|o__Bacteroidales|f__Prevotellaceae|g__Prevotella|s__uncultured_Prevotella_sp.	0	0.00291	0.03049	0	0	0	0	0	0	0	0.00598	0
d__Bacteria|p__Bacteroidota|c__Bacteroidia|o__Bacteroidales|f__Rikenellaceae	1.32307	4.04771	1.72568	4.23316	2.15793	1.20195	2.0875	2.1782	1.24754	1.87549	2.76209	1.47338
d__Bacteria|p__Bacteroidota|c__Bacteroidia|o__Bacteroidales|f__Rikenellaceae|g__Alistipes	0.31705	0.69913	0.44514	0.83695	0.26782	0.35044	1.22944	0.32515	0.63394	0.37143	1.22494	0.41014
d__Bacteria|p__Bacteroidota|c__Bacteroidia|o__Bacteroidales|f__Rikenellaceae|g__Alistipes|s__Alistipes_inops	0.07164	0.21702	0.06708	0.00468	0.05695	0.06609	0	0.00602	0.01409	0.00913	0.00896	0.02429
d__Bacteria|p__Bacteroidota|c__Bacteroidia|o__Bacteroidales|f__Rikenellaceae|g__Alistipes|s__Alistipes_massiliensis	0	0	0	0	0	0	0	0	0	0	0	0.00286
d__Bacteria|p__Bacteroidota|c__Bacteroidia|o__Bacteroidales|f__Rikenellaceae|g__Alistipes|s__Alistipes_sp.	0	0	0	0	0	0	0	0.01054	0	0	0	0
d__Bacteria|p__Bacteroidota|c__Bacteroidia|o__Bacteroidales|f__Rikenellaceae|g__Alistipes|s__Alistipes_sp._Marseille-P5061	0.00305	0	0	0	0	0	0.00449	0	0	0.00304	0	0
d__Bacteria|p__Bacteroidota|c__Bacteroidia|o__Bacteroidales|f__Rikenellaceae|g__Alistipes|s__Alistipes_sp._Marseille-P5997	0	0	0	0	0	0	0.01348	0	0	0.01522	0	0
d__Bacteria|p__Bacteroidota|c__Bacteroidia|o__Bacteroidales|f__Rikenellaceae|g__Alistipes|s__Alistipes_unclassified	0.14023	0.3685	0.18598	0.76044	0.13391	0.11681	1.10066	0.2273	0.56037	0.24357	1.08004	0.27724
d__Bacteria|p__Bacteroidota|c__Bacteroidia|o__Bacteroidales|f__Rikenellaceae|g__Alistipes|s__uncultured_Alistipes_sp.	0.10213	0.11361	0.19208	0.07183	0.07696	0.16754	0.11081	0.08129	0.05948	0.10047	0.13594	0.10575
d__Bacteria|p__Bacteroidota|c__Bacteroidia|o__Bacteroidales|f__Rikenellaceae|g__Rikenella	0.38107	2.26055	0.35977	3.35249	0.58027	0.82999	0.69184	0.68492	0.41637	0.52216	1.23988	0.26438
d__Bacteria|p__Bacteroidota|c__Bacteroidia|o__Bacteroidales|f__Rikenellaceae|g__Rikenellaceae_RC9_gut_group	0.62495	1.08803	0.9162	0.04372	1.30984	0.02152	0.16622	1.16813	0.1894	0.9819	0.29727	0.79886
d__Bacteria|p__Bacteroidota|c__Bacteroidia|o__Bacteroidales|f__Rikenellaceae|g__Rikenellaceae_RC9_gut_group|s__Rikenellaceae_RC9_gut_group_unclassified	0.62495	1.08803	0.9162	0.04372	1.30984	0.02152	0.16622	1.16813	0.1894	0.9819	0.29727	0.79886
d__Bacteria|p__Bacteroidota|c__Bacteroidia|o__Bacteroidales|f__Rikenellaceae|g__Rikenella|s__Rikenella_unclassified	0.38107	2.26055	0.35977	3.35249	0.58027	0.82999	0.69184	0.68492	0.41637	0.52216	1.23988	0.26438
d__Bacteria|p__Bacteroidota|c__Bacteroidia|o__Bacteroidales|f__Rikenellaceae|g__Tidjanibacter	0	0	0.00457	0	0	0	0	0	0	0	0	0
d__Bacteria|p__Bacteroidota|c__Bacteroidia|o__Bacteroidales|f__Rikenellaceae|g__Tidjanibacter|s__Tidjanibacter_massiliensis	0	0	0.00457	0	0	0	0	0	0	0	0	0
d__Bacteria|p__Bacteroidota|c__Bacteroidia|o__Bacteroidales|f__Rikenellaceae|g__dgA-11_gut_group	0	0	0	0	0	0	0	0	0.00783	0	0	0
d__Bacteria|p__Bacteroidota|c__Bacteroidia|o__Bacteroidales|f__Rikenellaceae|g__dgA-11_gut_group|s__dgA-11_gut_group_unclassified	0	0	0	0	0	0	0	0	0.00783	0	0	0
d__Bacteria|p__Bacteroidota|c__Bacteroidia|o__Bacteroidales|f__Tannerellaceae	0.80634	2.22996	1.47111	0.29824	0.43866	0.96064	0.21264	1.57156	1.59816	0.99255	0.35105	0.31011
d__Bacteria|p__Bacteroidota|c__Bacteroidia|o__Bacteroidales|f__Tannerellaceae|g__Parabacteroides	0.69202	1.60219	0.83541	0.07651	0.42789	0.22902	0.21264	1.56253	1.59033	0.98951	0.34358	0.31011
d__Bacteria|p__Bacteroidota|c__Bacteroidia|o__Bacteroidales|f__Tannerellaceae|g__Parabacteroides|s__Parabacteroides_distasonis	0	0	0	0	0	0.00922	0	0	0.02348	0	0	0
d__Bacteria|p__Bacteroidota|c__Bacteroidia|o__Bacteroidales|f__Tannerellaceae|g__Parabacteroides|s__Parabacteroides_goldsteinii	0	0	0.00305	0	0	0	0	0	0	0	0	0
d__Bacteria|p__Bacteroidota|c__Bacteroidia|o__Bacteroidales|f__Tannerellaceae|g__Parabacteroides|s__Parabacteroides_merdae	0	0	0	0	0	0	0	0	0	0	0.00747	0
d__Bacteria|p__Bacteroidota|c__Bacteroidia|o__Bacteroidales|f__Tannerellaceae|g__Parabacteroides|s__Parabacteroides_sp.	0	0.00583	0	0.00312	0.00308	0.00769	0	0.00301	0	0	0.00448	0.01572
d__Bacteria|p__Bacteroidota|c__Bacteroidia|o__Bacteroidales|f__Tannerellaceae|g__Parabacteroides|s__Parabacteroides_unclassified	0.68897	1.59636	0.66162	0.07339	0.42481	0.166	0.21264	1.48425	1.37119	0.9545	0.33163	0.29439
d__Bacteria|p__Bacteroidota|c__Bacteroidia|o__Bacteroidales|f__Tannerellaceae|g__Parabacteroides|s__uncultured_Parabacteroides_sp.	0.00305	0	0.17074	0	0	0.04611	0	0.07527	0.19566	0.03501	0	0
d__Bacteria|p__Bacteroidota|c__Bacteroidia|o__Bacteroidales|f__Tannerellaceae|g__Tannerellaceae_unclassified	0.11432	0.62777	0.6357	0.22173	0.01077	0.73162	0	0.00903	0.00783	0.00304	0.00747	0
d__Bacteria|p__Bacteroidota|c__Bacteroidia|o__Bacteroidales|f__Tannerellaceae|g__Tannerellaceae_unclassified|s__Tannerellaceae_unclassified	0.11432	0.62777	0.6357	0.22173	0.01077	0.73162	0	0.00903	0.00783	0.00304	0.00747	0
d__Bacteria|p__Bacteroidota|c__Bacteroidia|o__Chitinophagales	0	0	0	0	0	0.00307	0	0.00452	0	0	0	0
d__Bacteria|p__Bacteroidota|c__Bacteroidia|o__Chitinophagales|f__Chitinophagaceae	0	0	0	0	0	0.00307	0	0.00452	0	0	0	0
d__Bacteria|p__Bacteroidota|c__Bacteroidia|o__Chitinophagales|f__Chitinophagaceae|g__Chitinophaga	0	0	0	0	0	0	0	0	0	0	0	0
d__Bacteria|p__Bacteroidota|c__Bacteroidia|o__Chitinophagales|f__Chitinophagaceae|g__Chitinophaga|s__Chitinophaga_unclassified	0	0	0	0	0	0	0	0	0	0	0	0
d__Bacteria|p__Bacteroidota|c__Bacteroidia|o__Chitinophagales|f__Chitinophagaceae|g__Ferruginibacter	0	0	0	0	0	0.00307	0	0.00452	0	0	0	0
d__Bacteria|p__Bacteroidota|c__Bacteroidia|o__Chitinophagales|f__Chitinophagaceae|g__Ferruginibacter|s__Ferruginibacter_unclassified	0	0	0	0	0	0.00307	0	0.00452	0	0	0	0
d__Bacteria|p__Bacteroidota|c__Bacteroidia|o__Flavobacteriales	0.08841	0.02622	0.01982	0.04216	0.02001	0.06917	0.08535	0.05269	0.05948	0.05633	0.02689	0.05002
d__Bacteria|p__Bacteroidota|c__Bacteroidia|o__Flavobacteriales|f__Flavobacteriaceae	0.00915	0	0	0	0	0	0	0	0	0	0	0
d__Bacteria|p__Bacteroidota|c__Bacteroidia|o__Flavobacteriales|f__Flavobacteriaceae|g__Flavobacterium	0.00915	0	0	0	0	0	0	0	0	0	0	0
d__Bacteria|p__Bacteroidota|c__Bacteroidia|o__Flavobacteriales|f__Flavobacteriaceae|g__Flavobacterium|s__Flavobacterium_unclassified	0.00915	0	0	0	0	0	0	0	0	0	0	0
d__Bacteria|p__Bacteroidota|c__Bacteroidia|o__Flavobacteriales|f__Flavobacteriaceae|g__Myroides	0	0	0	0	0	0	0	0	0	0	0	0
d__Bacteria|p__Bacteroidota|c__Bacteroidia|o__Flavobacteriales|f__Flavobacteriaceae|g__Myroides|s__Myroides_unclassified	0	0	0	0	0	0	0	0	0	0	0	0
d__Bacteria|p__Bacteroidota|c__Bacteroidia|o__Flavobacteriales|f__Weeksellaceae	0.07926	0.02622	0.01982	0.04216	0.02001	0.06917	0.08535	0.05269	0.05948	0.05633	0.02689	0.05002
d__Bacteria|p__Bacteroidota|c__Bacteroidia|o__Flavobacteriales|f__Weeksellaceae|g__Bergeyella	0.01372	0	0.01982	0.01561	0	0.01691	0.01348	0.01054	0.02035	0.00761	0.02689	0.02144
d__Bacteria|p__Bacteroidota|c__Bacteroidia|o__Flavobacteriales|f__Weeksellaceae|g__Bergeyella|s__Bergeyella_unclassified	0.01372	0	0.01982	0.01561	0	0.01691	0.01348	0.01054	0.02035	0.00761	0.02689	0.02144
d__Bacteria|p__Bacteroidota|c__Bacteroidia|o__Flavobacteriales|f__Weeksellaceae|g__Chryseobacterium	0.06554	0.02622	0	0.01874	0.02001	0.05226	0.06888	0.03763	0.03913	0.03806	0	0.02858
d__Bacteria|p__Bacteroidota|c__Bacteroidia|o__Flavobacteriales|f__Weeksellaceae|g__Chryseobacterium|s__Chryseobacterium_unclassified	0.06554	0.02622	0	0.01874	0.02001	0.05226	0.06888	0.03763	0.03913	0.03806	0	0.02858
d__Bacteria|p__Bacteroidota|c__Bacteroidia|o__Flavobacteriales|f__Weeksellaceae|g__Weeksella	0	0	0	0.00781	0	0	0.00299	0.00452	0	0.01066	0	0
d__Bacteria|p__Bacteroidota|c__Bacteroidia|o__Flavobacteriales|f__Weeksellaceae|g__Weeksella|s__Weeksella_unclassified	0	0	0	0.00781	0	0	0.00299	0.00452	0	0.01066	0	0
d__Bacteria|p__Bacteroidota|c__Bacteroidia|o__Sphingobacteriales	0	0	0	0	0	0	0	0	0	0.01066	0	0
d__Bacteria|p__Bacteroidota|c__Bacteroidia|o__Sphingobacteriales|f__Sphingobacteriaceae	0	0	0	0	0	0	0	0	0	0.01066	0	0
d__Bacteria|p__Bacteroidota|c__Bacteroidia|o__Sphingobacteriales|f__Sphingobacteriaceae|g__Sphingobacteriaceae_unclassified	0	0	0	0	0	0	0	0	0	0.01066	0	0
d__Bacteria|p__Bacteroidota|c__Bacteroidia|o__Sphingobacteriales|f__Sphingobacteriaceae|g__Sphingobacteriaceae_unclassified|s__Sphingobacteriaceae_unclassified	0	0	0	0	0	0	0	0	0	0.01066	0	0
d__Bacteria|p__Bacteroidota|c__Bacteroidota_unclassified	0.01829	0.02622	0	0	0	0.01383	0	0.00903	0.01096	0.0274	0.02988	0
d__Bacteria|p__Bacteroidota|c__Bacteroidota_unclassified|o__Bacteroidota_unclassified	0.01829	0.02622	0	0	0	0.01383	0	0.00903	0.01096	0.0274	0.02988	0
d__Bacteria|p__Bacteroidota|c__Bacteroidota_unclassified|o__Bacteroidota_unclassified|f__Bacteroidota_unclassified	0.01829	0.02622	0	0	0	0.01383	0	0.00903	0.01096	0.0274	0.02988	0
d__Bacteria|p__Bacteroidota|c__Bacteroidota_unclassified|o__Bacteroidota_unclassified|f__Bacteroidota_unclassified|g__Bacteroidota_unclassified	0.01829	0.02622	0	0	0	0.01383	0	0.00903	0.01096	0.0274	0.02988	0
d__Bacteria|p__Bacteroidota|c__Bacteroidota_unclassified|o__Bacteroidota_unclassified|f__Bacteroidota_unclassified|g__Bacteroidota_unclassified|s__Bacteroidota_unclassified	0.01829	0.02622	0	0	0	0.01383	0	0.00903	0.01096	0.0274	0.02988	0
d__Bacteria|p__Campylobacterota	0.01067	0.0204	0.02744	0.04841	0.0154	0.02152	0.04941	0.01957	0.01565	0	0.02241	0.05717
d__Bacteria|p__Campylobacterota|c__Campylobacteria	0.01067	0.0204	0.02744	0.04841	0.0154	0.02152	0.04941	0.01957	0.01565	0	0.02241	0.05717
d__Bacteria|p__Campylobacterota|c__Campylobacteria|o__Campylobacterales	0.01067	0.0204	0.02744	0.04841	0.0154	0.02152	0.04941	0.01957	0.01565	0	0.02241	0.05717
d__Bacteria|p__Campylobacterota|c__Campylobacteria|o__Campylobacterales|f__Campylobacteraceae	0.01067	0.01457	0.01372	0.0406	0.00924	0.01076	0.02845	0.01355	0.01252	0	0.02241	0.05002
d__Bacteria|p__Campylobacterota|c__Campylobacteria|o__Campylobacterales|f__Campylobacteraceae|g__Campylobacter	0.01067	0.01457	0.01372	0.0406	0.00924	0.01076	0.02845	0.01355	0.01252	0	0.02241	0.05002
d__Bacteria|p__Campylobacterota|c__Campylobacteria|o__Campylobacterales|f__Campylobacteraceae|g__Campylobacter|s__Campylobacter_unclassified	0.01067	0.01457	0.01372	0.0406	0.00924	0.01076	0.02845	0.01355	0.01252	0	0.02241	0.05002
d__Bacteria|p__Campylobacterota|c__Campylobacteria|o__Campylobacterales|f__Helicobacteraceae	0	0.00583	0.01372	0.00781	0.00616	0.01076	0.02096	0.00602	0.00313	0	0	0.00715
d__Bacteria|p__Campylobacterota|c__Campylobacteria|o__Campylobacterales|f__Helicobacteraceae|g__Helicobacter	0	0.00583	0.01372	0.00781	0.00616	0.01076	0.02096	0.00602	0.00313	0	0	0.00715
d__Bacteria|p__Campylobacterota|c__Campylobacteria|o__Campylobacterales|f__Helicobacteraceae|g__Helicobacter|s__Helicobacter_unclassified	0	0.00583	0.01372	0.00781	0.00616	0.01076	0.02096	0.00602	0.00313	0	0	0.00715
d__Bacteria|p__Cyanobacteria	0.08384	0.04952	0.03964	0.09681	0.08928	0.02459	0.03145	0.01204	0.04696	0.01827	0.10307	0.05431
d__Bacteria|p__Cyanobacteria|c__Cyanobacteriia	0.0061	0.0233	0.01677	0.01093	0.00924	0.01537	0	0	0	0	0.01344	0.00429
d__Bacteria|p__Cyanobacteria|c__Cyanobacteriia|o__Chloroplast	0.0061	0.0233	0.01677	0.01093	0.00924	0.01537	0	0	0	0	0.01344	0.00429
d__Bacteria|p__Cyanobacteria|c__Cyanobacteriia|o__Chloroplast|f__Chloroplast_unclassified	0.0061	0.0233	0.01677	0.01093	0.00924	0.01537	0	0	0	0	0.01344	0.00429
d__Bacteria|p__Cyanobacteria|c__Cyanobacteriia|o__Chloroplast|f__Chloroplast_unclassified|g__Chloroplast_unclassified	0.0061	0.0233	0.01677	0.01093	0.00924	0.01537	0	0	0	0	0.01344	0.00429
d__Bacteria|p__Cyanobacteria|c__Cyanobacteriia|o__Chloroplast|f__Chloroplast_unclassified|g__Chloroplast_unclassified|s__Chloroplast_unclassified	0.0061	0.0233	0.01677	0.01093	0.00924	0.01537	0	0	0	0	0.01344	0.00429
d__Bacteria|p__Cyanobacteria|c__Vampirivibrionia	0.07774	0.02622	0.02287	0.08588	0.08004	0.00922	0.03145	0.01204	0.04696	0.01827	0.08963	0.05002
d__Bacteria|p__Cyanobacteria|c__Vampirivibrionia|o__Gastranaerophilales	0.07774	0.02622	0.02287	0.08588	0.08004	0.00922	0.03145	0.01204	0.04696	0.01827	0.08963	0.05002
d__Bacteria|p__Cyanobacteria|c__Vampirivibrionia|o__Gastranaerophilales|f__Gastranaerophilales_unclassified	0.07774	0.02622	0.02287	0.08588	0.08004	0.00922	0.03145	0.01204	0.04696	0.01827	0.08963	0.05002
d__Bacteria|p__Cyanobacteria|c__Vampirivibrionia|o__Gastranaerophilales|f__Gastranaerophilales_unclassified|g__Gastranaerophilales_unclassified	0.07774	0.02622	0.02287	0.08588	0.08004	0.00922	0.03145	0.01204	0.04696	0.01827	0.08963	0.05002
d__Bacteria|p__Cyanobacteria|c__Vampirivibrionia|o__Gastranaerophilales|f__Gastranaerophilales_unclassified|g__Gastranaerophilales_unclassified|s__Gastranaerophilales_unclassified	0.07774	0.02622	0.02287	0.08588	0.08004	0.00922	0.03145	0.01204	0.04696	0.01827	0.08963	0.05002
d__Bacteria|p__Deferribacterota	0.24998	1.39391	0.08689	0.03904	0.50947	0.1537	0.24559	0.3101	0.11896	0.31512	0.83057	0.03716
d__Bacteria|p__Deferribacterota|c__Deferribacteres	0.24998	1.39391	0.08689	0.03904	0.50947	0.1537	0.24559	0.3101	0.11896	0.31512	0.83057	0.03716
d__Bacteria|p__Deferribacterota|c__Deferribacteres|o__Deferribacterales	0.24998	1.39391	0.08689	0.03904	0.50947	0.1537	0.24559	0.3101	0.11896	0.31512	0.83057	0.03716
d__Bacteria|p__Deferribacterota|c__Deferribacteres|o__Deferribacterales|f__Deferribacteraceae	0.24998	1.39391	0.08689	0.03904	0.50947	0.1537	0.24559	0.3101	0.11896	0.31512	0.83057	0.03716
d__Bacteria|p__Deferribacterota|c__Deferribacteres|o__Deferribacterales|f__Deferribacteraceae|g__Mucispirillum	0.24998	1.39391	0.08689	0.03904	0.50947	0.1537	0.24559	0.3101	0.11896	0.31512	0.83057	0.03716
d__Bacteria|p__Deferribacterota|c__Deferribacteres|o__Deferribacterales|f__Deferribacteraceae|g__Mucispirillum|s__Mucispirillum_unclassified	0.24998	1.39391	0.08689	0.03904	0.50947	0.1537	0.24559	0.3101	0.11896	0.31512	0.83057	0.03716
d__Bacteria|p__Deinococcota	0.04573	0.02622	0.02287	0.00937	0.01231	0.02767	0.06289	0.02258	0.05165	0.01979	0.04183	0.03573
d__Bacteria|p__Deinococcota|c__Deinococci	0.04573	0.02622	0.02287	0.00937	0.01231	0.02767	0.06289	0.02258	0.05165	0.01979	0.04183	0.03573
d__Bacteria|p__Deinococcota|c__Deinococci|o__Deinococcales	0.04573	0.02622	0.02287	0.00937	0.01231	0.02767	0.06289	0.02258	0.05165	0.01979	0.04183	0.03573
d__Bacteria|p__Deinococcota|c__Deinococci|o__Deinococcales|f__Deinococcaceae	0.04573	0.02622	0.02287	0.00937	0.01231	0.02767	0.06289	0.02258	0.05165	0.01979	0.04183	0.03573
d__Bacteria|p__Deinococcota|c__Deinococci|o__Deinococcales|f__Deinococcaceae|g__Deinococcus	0.04573	0.02622	0.02287	0.00937	0.01231	0.02767	0.06289	0.02258	0.05165	0.01979	0.04183	0.03573
d__Bacteria|p__Deinococcota|c__Deinococci|o__Deinococcales|f__Deinococcaceae|g__Deinococcus|s__Deinococcus_unclassified	0.04573	0.02622	0.02287	0.00937	0.01231	0.02767	0.06289	0.02258	0.05165	0.01979	0.04183	0.03573
d__Bacteria|p__Desulfobacterota	0.66002	0.30587	0.47106	0.43722	0.8019	0.4442	0.94492	0.6533	0.58072	1.01539	0.83803	0.47731
d__Bacteria|p__Desulfobacterota|c__Desulfovibrionia	0.66002	0.30587	0.47106	0.43722	0.8019	0.4442	0.94492	0.6533	0.58072	1.01539	0.83803	0.47731
d__Bacteria|p__Desulfobacterota|c__Desulfovibrionia|o__Desulfovibrionales	0.66002	0.30587	0.47106	0.43722	0.8019	0.4442	0.94492	0.6533	0.58072	1.01539	0.83803	0.47731
d__Bacteria|p__Desulfobacterota|c__Desulfovibrionia|o__Desulfovibrionales|f__Desulfovibrionaceae	0.66002	0.30587	0.47106	0.43722	0.8019	0.4442	0.94492	0.6533	0.58072	1.01539	0.83803	0.47731
d__Bacteria|p__Desulfobacterota|c__Desulfovibrionia|o__Desulfovibrionales|f__Desulfovibrionaceae|g__Bilophila	0.0564	0.03204	0.0686	0.11399	0.16007	0.05687	0.15424	0.00602	0.00939	0	0.15237	0.01572
d__Bacteria|p__Desulfobacterota|c__Desulfovibrionia|o__Desulfovibrionales|f__Desulfovibrionaceae|g__Bilophila|s__Bilophila_unclassified	0.0564	0.03204	0.0686	0.11399	0.16007	0.05687	0.15424	0.00602	0.00939	0	0.15237	0.01572
d__Bacteria|p__Desulfobacterota|c__Desulfovibrionia|o__Desulfovibrionales|f__Desulfovibrionaceae|g__Desulfovibrio	0.24084	0.18061	0.19513	0.17489	0.49869	0.17522	0.51364	0.39439	0.26297	0.74289	0.41528	0.20436
d__Bacteria|p__Desulfobacterota|c__Desulfovibrionia|o__Desulfovibrionales|f__Desulfovibrionaceae|g__Desulfovibrionaceae_unclassified	0.36278	0.09322	0.20733	0.14834	0.14314	0.21211	0.27704	0.25289	0.30836	0.2725	0.27038	0.25723
d__Bacteria|p__Desulfobacterota|c__Desulfovibrionia|o__Desulfovibrionales|f__Desulfovibrionaceae|g__Desulfovibrionaceae_unclassified|s__Desulfovibrionaceae_unclassified	0.36278	0.09322	0.20733	0.14834	0.14314	0.21211	0.27704	0.25289	0.30836	0.2725	0.27038	0.25723
d__Bacteria|p__Desulfobacterota|c__Desulfovibrionia|o__Desulfovibrionales|f__Desulfovibrionaceae|g__Desulfovibrio|s__Desulfovibrio_unclassified	0.24084	0.18061	0.19513	0.17489	0.49869	0.17522	0.51364	0.39439	0.26297	0.74289	0.41528	0.20436
d__Bacteria|p__Elusimicrobiota	0	0	0	0	0	0	0	0	0	0.00457	0	0
d__Bacteria|p__Elusimicrobiota|c__Elusimicrobia	0	0	0	0	0	0	0	0	0	0.00457	0	0
d__Bacteria|p__Elusimicrobiota|c__Elusimicrobia|o__Elusimicrobiales	0	0	0	0	0	0	0	0	0	0.00457	0	0
d__Bacteria|p__Elusimicrobiota|c__Elusimicrobia|o__Elusimicrobiales|f__Elusimicrobiaceae	0	0	0	0	0	0	0	0	0	0.00457	0	0
d__Bacteria|p__Elusimicrobiota|c__Elusimicrobia|o__Elusimicrobiales|f__Elusimicrobiaceae|g__Elusimicrobium	0	0	0	0	0	0	0	0	0	0.00457	0	0
d__Bacteria|p__Elusimicrobiota|c__Elusimicrobia|o__Elusimicrobiales|f__Elusimicrobiaceae|g__Elusimicrobium|s__Elusimicrobium_unclassified	0	0	0	0	0	0	0	0	0	0.00457	0	0
d__Bacteria|p__Firmicutes	81.0334	65.684	35.2745	75.2865	79.5952	33.9881	51.7669	40.7566	47.1042	50.3068	67.1925	36.6388
d__Bacteria|p__Firmicutes|c__Bacilli	56.1451	49.3664	15.5007	53.2869	26.2229	13.7948	5.55118	4.39553	1.59505	10.947	11.4054	13.279
d__Bacteria|p__Firmicutes|c__Bacilli|o__Acholeplasmatales	0.04725	0	0	0	0.05079	0	0.00299	0	0	0	0.00448	0.05431
d__Bacteria|p__Firmicutes|c__Bacilli|o__Acholeplasmatales|f__Acholeplasmataceae	0.04725	0	0	0	0.05079	0	0.00299	0	0	0	0.00448	0.05431
d__Bacteria|p__Firmicutes|c__Bacilli|o__Acholeplasmatales|f__Acholeplasmataceae|g__Anaeroplasma	0.04725	0	0	0	0.05079	0	0.00299	0	0	0	0.00448	0.05431
d__Bacteria|p__Firmicutes|c__Bacilli|o__Acholeplasmatales|f__Acholeplasmataceae|g__Anaeroplasma|s__Anaeroplasma_unclassified	0.04725	0	0	0	0.05079	0	0.00299	0	0	0	0.00448	0.05431
d__Bacteria|p__Firmicutes|c__Bacilli|o__Bacillales	0	0	0	0	0	0	0	0	0	0	0	0
d__Bacteria|p__Firmicutes|c__Bacilli|o__Bacillales|f__Bacillaceae	0	0	0	0	0	0	0	0	0	0	0	0
d__Bacteria|p__Firmicutes|c__Bacilli|o__Bacillales|f__Bacillaceae|g__Bacillus	0	0	0	0	0	0	0	0	0	0	0	0
d__Bacteria|p__Firmicutes|c__Bacilli|o__Bacillales|f__Bacillaceae|g__Bacillus|s__Bacillus_sp._enrichment_culture_clone_HM-01	0	0	0	0	0	0	0	0	0	0	0	0
d__Bacteria|p__Firmicutes|c__Bacilli|o__Erysipelotrichales	0.17682	0.6802	0.23324	0.71517	0.06465	0.55024	0.50315	0.29955	0.18002	0.34252	0.83504	0.54877
d__Bacteria|p__Firmicutes|c__Bacilli|o__Erysipelotrichales|f__Erysipelatoclostridiaceae	0.08536	0.32918	0.16007	0.25452	0.02463	0.4196	0.17221	0.07677	0.12053	0.12179	0.44964	0.45159
d__Bacteria|p__Firmicutes|c__Bacilli|o__Erysipelotrichales|f__Erysipelatoclostridiaceae|g__Candidatus_Stoquefichus	0	0	0.03811	0	0.00924	0	0.00599	0.01505	0	0.00609	0.0239	0.08432
d__Bacteria|p__Firmicutes|c__Bacilli|o__Erysipelotrichales|f__Erysipelatoclostridiaceae|g__Candidatus_Stoquefichus|s__Candidatus_Stoquefichus_unclassified	0	0	0.03811	0	0.00924	0	0.00599	0.01505	0	0.00609	0.0239	0.08432
d__Bacteria|p__Firmicutes|c__Bacilli|o__Erysipelotrichales|f__Erysipelatoclostridiaceae|g__Erysipelatoclostridiaceae_unclassified	0	0	0	0.00625	0	0	0	0	0	0.01218	0	0
d__Bacteria|p__Firmicutes|c__Bacilli|o__Erysipelotrichales|f__Erysipelatoclostridiaceae|g__Erysipelatoclostridiaceae_unclassified|s__Erysipelatoclostridiaceae_unclassified	0	0	0	0.00625	0	0	0	0	0	0.01218	0	0
d__Bacteria|p__Firmicutes|c__Bacilli|o__Erysipelotrichales|f__Erysipelatoclostridiaceae|g__Erysipelatoclostridium	0.08536	0.32918	0.10824	0.24827	0.01077	0.41653	0.14975	0.06172	0.12053	0.10352	0.41678	0.36727
d__Bacteria|p__Firmicutes|c__Bacilli|o__Erysipelotrichales|f__Erysipelatoclostridiaceae|g__Erysipelatoclostridium|s__Erysipelatoclostridium_unclassified	0.08536	0.32918	0.10824	0.24827	0.01077	0.41653	0.14975	0.06172	0.12053	0.10352	0.41678	0.36727
d__Bacteria|p__Firmicutes|c__Bacilli|o__Erysipelotrichales|f__Erysipelatoclostridiaceae|g__Erysipelotrichaceae_UCG-003	0	0	0.01372	0	0.00462	0.00307	0.01647	0	0	0	0.00896	0
d__Bacteria|p__Firmicutes|c__Bacilli|o__Erysipelotrichales|f__Erysipelatoclostridiaceae|g__Erysipelotrichaceae_UCG-003|s__Erysipelotrichaceae_UCG-003_unclassified	0	0	0.01372	0	0.00462	0.00307	0.01647	0	0	0	0.00896	0
d__Bacteria|p__Firmicutes|c__Bacilli|o__Erysipelotrichales|f__Erysipelotrichaceae	0.09146	0.35102	0.07317	0.46065	0.04002	0.13064	0.33094	0.22278	0.05949	0.22073	0.3854	0.09718
d__Bacteria|p__Firmicutes|c__Bacilli|o__Erysipelotrichales|f__Erysipelotrichaceae|g__Allobaculum	0.01372	0.01602	0.00457	0	0	0.01998	0	0.00301	0.00783	0.00913	0	0
d__Bacteria|p__Firmicutes|c__Bacilli|o__Erysipelotrichales|f__Erysipelotrichaceae|g__Allobaculum|s__Allobaculum_unclassified	0.01372	0.01602	0.00457	0	0	0.01998	0	0.00301	0.00783	0.00913	0	0
d__Bacteria|p__Firmicutes|c__Bacilli|o__Erysipelotrichales|f__Erysipelotrichaceae|g__Dielma	0	0	0	0	0	0	0	0	0	0	0	0
d__Bacteria|p__Firmicutes|c__Bacilli|o__Erysipelotrichales|f__Erysipelotrichaceae|g__Dielma|s__Dielma_unclassified	0	0	0	0	0	0	0	0	0	0	0	0
d__Bacteria|p__Firmicutes|c__Bacilli|o__Erysipelotrichales|f__Erysipelotrichaceae|g__Dubosiella	0	0	0.01067	0	0	0.0292	0	0	0	0.00304	0.00896	0
d__Bacteria|p__Firmicutes|c__Bacilli|o__Erysipelotrichales|f__Erysipelotrichaceae|g__Dubosiella|s__Dubosiella_unclassified	0	0	0.01067	0	0	0.0292	0	0	0	0.00304	0.00896	0
d__Bacteria|p__Firmicutes|c__Bacilli|o__Erysipelotrichales|f__Erysipelotrichaceae|g__Erysipelotrichaceae_unclassified	0.02134	0.27966	0.00762	0.40911	0.01847	0.02306	0.30549	0.20472	0.03131	0.19181	0.34507	0.07717
d__Bacteria|p__Firmicutes|c__Bacilli|o__Erysipelotrichales|f__Erysipelotrichaceae|g__Erysipelotrichaceae_unclassified|s__Erysipelotrichaceae_unclassified	0.02134	0.27966	0.00762	0.40911	0.01847	0.02306	0.30549	0.20472	0.03131	0.19181	0.34507	0.07717
d__Bacteria|p__Firmicutes|c__Bacilli|o__Erysipelotrichales|f__Erysipelotrichaceae|g__Faecalibaculum	0.01677	0.01602	0.0122	0.00781	0	0.00922	0.00898	0	0	0	0.00448	0
d__Bacteria|p__Firmicutes|c__Bacilli|o__Erysipelotrichales|f__Erysipelotrichaceae|g__Faecalibaculum|s__Faecalibaculum_unclassified	0.01677	0.01602	0.0122	0.00781	0	0.00922	0.00898	0	0	0	0.00448	0
d__Bacteria|p__Firmicutes|c__Bacilli|o__Erysipelotrichales|f__Erysipelotrichaceae|g__Ileibacterium	0.02286	0.01893	0.01677	0.02655	0.02155	0.01844	0	0	0.0047	0	0	0
d__Bacteria|p__Firmicutes|c__Bacilli|o__Erysipelotrichales|f__Erysipelotrichaceae|g__Ileibacterium|s__Ileibacterium_unclassified	0.02286	0.01893	0.01677	0.02655	0.02155	0.01844	0	0	0.0047	0	0	0
d__Bacteria|p__Firmicutes|c__Bacilli|o__Erysipelotrichales|f__Erysipelotrichaceae|g__Turicibacter	0.01677	0.02039	0.02134	0.01718	0	0.03074	0.01647	0.01505	0.01565	0.01675	0.02689	0.02001
d__Bacteria|p__Firmicutes|c__Bacilli|o__Erysipelotrichales|f__Erysipelotrichaceae|g__Turicibacter|s__Turicibacter_unclassified	0.01677	0.02039	0.02134	0.01718	0	0.03074	0.01647	0.01505	0.01565	0.01675	0.02689	0.02001
d__Bacteria|p__Firmicutes|c__Bacilli|o__Exiguobacterales	0.01067	0.00583	0.01524	0	0.02617	0	0	0	0	0	0	0
d__Bacteria|p__Firmicutes|c__Bacilli|o__Exiguobacterales|f__Exiguobacteraceae	0.01067	0.00583	0.01524	0	0.02617	0	0	0	0	0	0	0
d__Bacteria|p__Firmicutes|c__Bacilli|o__Exiguobacterales|f__Exiguobacteraceae|g__Exiguobacterium	0.01067	0.00583	0.01524	0	0.02617	0	0	0	0	0	0	0
d__Bacteria|p__Firmicutes|c__Bacilli|o__Exiguobacterales|f__Exiguobacteraceae|g__Exiguobacterium|s__Exiguobacterium_unclassified	0.01067	0.00583	0.01524	0	0.02617	0	0	0	0	0	0	0
d__Bacteria|p__Firmicutes|c__Bacilli|o__Lactobacillales	53.0905	42.9839	14.3192	46.0713	20.7973	12.9694	4.57633	3.63686	1.28667	10.0215	10.0266	12.3016
d__Bacteria|p__Firmicutes|c__Bacilli|o__Lactobacillales|f__Aerococcaceae	0.0564	0.02476	0.0061	0.01249	0.00616	0.01999	0.06439	0.02409	0.036	0.0274	0.00598	0.01143
d__Bacteria|p__Firmicutes|c__Bacilli|o__Lactobacillales|f__Aerococcaceae|g__Aerococcus	0.0503	0.01893	0.0061	0.01249	0.00616	0.0123	0.06439	0.02409	0.036	0.0274	0.00598	0.01143
d__Bacteria|p__Firmicutes|c__Bacilli|o__Lactobacillales|f__Aerococcaceae|g__Aerococcus|s__Aerococcus_sp._148a	0.0503	0.01893	0.0061	0.01249	0.00616	0.0123	0.06439	0.02409	0.036	0.0274	0.00598	0.01143
d__Bacteria|p__Firmicutes|c__Bacilli|o__Lactobacillales|f__Aerococcaceae|g__Facklamia	0.0061	0.00583	0	0	0	0.00769	0	0	0	0	0	0
d__Bacteria|p__Firmicutes|c__Bacilli|o__Lactobacillales|f__Aerococcaceae|g__Facklamia|s__Facklamia_tabacinasalis	0.0061	0.00583	0	0	0	0.00769	0	0	0	0	0	0
d__Bacteria|p__Firmicutes|c__Bacilli|o__Lactobacillales|f__Carnobacteriaceae	0.00762	0.00728	0.0061	0.00468	0.01539	0.00769	0	0.00903	0	0.00609	0.01195	0.02716
d__Bacteria|p__Firmicutes|c__Bacilli|o__Lactobacillales|f__Carnobacteriaceae|g__Atopobacter	0.00762	0.00728	0	0	0	0.00769	0	0.00903	0	0	0.00299	0.02001
d__Bacteria|p__Firmicutes|c__Bacilli|o__Lactobacillales|f__Carnobacteriaceae|g__Atopobacter|s__Atopobacter_phocae	0.00762	0.00728	0	0	0	0.00769	0	0.00903	0	0	0.00299	0.02001
d__Bacteria|p__Firmicutes|c__Bacilli|o__Lactobacillales|f__Carnobacteriaceae|g__Desemzia	0	0	0.0061	0	0.01539	0	0	0	0	0.00609	0.00896	0.00715
d__Bacteria|p__Firmicutes|c__Bacilli|o__Lactobacillales|f__Carnobacteriaceae|g__Desemzia|s__Desemzia_unclassified	0	0	0.0061	0	0.01539	0	0	0	0	0.00609	0.00896	0.00715
d__Bacteria|p__Firmicutes|c__Bacilli|o__Lactobacillales|f__Carnobacteriaceae|g__Jeotgalibaca	0	0	0	0.00468	0	0	0	0	0	0	0	0
d__Bacteria|p__Firmicutes|c__Bacilli|o__Lactobacillales|f__Carnobacteriaceae|g__Jeotgalibaca|s__Jeotgalibaca_sp._PTS2502	0	0	0	0.00468	0	0	0	0	0	0	0	0
d__Bacteria|p__Firmicutes|c__Bacilli|o__Lactobacillales|f__Carnobacteriaceae|g__Trichococcus	0	0	0	0	0	0	0	0	0	0	0	0
d__Bacteria|p__Firmicutes|c__Bacilli|o__Lactobacillales|f__Carnobacteriaceae|g__Trichococcus|s__uncultured_Trichococcus_sp.	0	0	0	0	0	0	0	0	0	0	0	0
d__Bacteria|p__Firmicutes|c__Bacilli|o__Lactobacillales|f__Enterococcaceae	0.02286	0.0568	0.00915	0.03435	0.02771	0.05841	0.01348	0.00753	0.01096	0.00609	0	0.03287
d__Bacteria|p__Firmicutes|c__Bacilli|o__Lactobacillales|f__Enterococcaceae|g__Enterococcus	0.02286	0.0568	0.00915	0.03435	0.02771	0.05841	0.01348	0.00753	0.01096	0.00609	0	0.03287
d__Bacteria|p__Firmicutes|c__Bacilli|o__Lactobacillales|f__Enterococcaceae|g__Enterococcus|s__Enterococcus_faecalis	0.02286	0.0568	0.00915	0.03435	0.02771	0.00461	0.01348	0.00753	0.01096	0.00609	0	0.01572
d__Bacteria|p__Firmicutes|c__Bacilli|o__Lactobacillales|f__Enterococcaceae|g__Enterococcus|s__Enterococcus_faecium	0	0	0	0	0	0.0538	0	0	0	0	0	0.01715
d__Bacteria|p__Firmicutes|c__Bacilli|o__Lactobacillales|f__Lactobacillaceae	52.4899	42.2731	13.8939	45.4405	19.9615	12.4007	3.71829	3.04978	0.86874	9.34404	8.39683	11.3541
d__Bacteria|p__Firmicutes|c__Bacilli|o__Lactobacillales|f__Lactobacillaceae|g__HT002	0.81701	0.60883	0.14482	0.34196	0.49715	0.21826	0.43727	1.11996	0.10957	2.88785	0.73347	2.64666
d__Bacteria|p__Firmicutes|c__Bacilli|o__Lactobacillales|f__Lactobacillaceae|g__HT002|s__HT002_unclassified	0.81701	0.60883	0.14482	0.34196	0.49715	0.21826	0.43727	1.11996	0.10957	2.88785	0.73347	2.64666
d__Bacteria|p__Firmicutes|c__Bacilli|o__Lactobacillales|f__Lactobacillaceae|g__Lactiplantibacillus	0	0	0	0	0	0	0	0	0	0	0	0
d__Bacteria|p__Firmicutes|c__Bacilli|o__Lactobacillales|f__Lactobacillaceae|g__Lactiplantibacillus|s__Lactiplantibacillus_unclassified	0	0	0	0	0	0	0	0	0	0	0	0
d__Bacteria|p__Firmicutes|c__Bacilli|o__Lactobacillales|f__Lactobacillaceae|g__Lactobacillus	0.40241	0.36851	0.27288	0.39661	0.64646	0.34582	0.4777	0.39138	0.20349	0.5998	0.48401	0.55591
d__Bacteria|p__Firmicutes|c__Bacilli|o__Lactobacillales|f__Lactobacillaceae|g__Lactobacillus|s__Lactobacillus_crispatus	0	0	0	0.00312	0	0.00307	0.00599	0	0	0	0	0.01715
d__Bacteria|p__Firmicutes|c__Bacilli|o__Lactobacillales|f__Lactobacillaceae|g__Lactobacillus|s__Lactobacillus_hominis	0	0	0	0	0.05849	0	0	0	0	0	0	0
d__Bacteria|p__Firmicutes|c__Bacilli|o__Lactobacillales|f__Lactobacillaceae|g__Lactobacillus|s__Lactobacillus_intestinalis	0	0	0	0	0	0	0	0	0	0.00761	0	0
d__Bacteria|p__Firmicutes|c__Bacilli|o__Lactobacillales|f__Lactobacillaceae|g__Lactobacillus|s__Lactobacillus_sp._L-YJ	0.26065	0.27092	0.16922	0.26701	0.47099	0.21979	0.37737	0.28902	0.12992	0.52216	0.39587	0.42872
d__Bacteria|p__Firmicutes|c__Bacilli|o__Lactobacillales|f__Lactobacillaceae|g__Lactobacillus|s__Lactobacillus_taiwanensis	0.14176	0.09759	0.10366	0.12648	0.11698	0.12296	0.09434	0.10236	0.07357	0.07003	0.08814	0.11004
d__Bacteria|p__Firmicutes|c__Bacilli|o__Lactobacillales|f__Lactobacillaceae|g__Lentilactobacillus	0.00915	0	0.00762	0	0	0.00615	0	0	0	0.00457	0	0
d__Bacteria|p__Firmicutes|c__Bacilli|o__Lactobacillales|f__Lactobacillaceae|g__Lentilactobacillus|s__Lentilactobacillus_unclassified	0.00915	0	0.00762	0	0	0.00615	0	0	0	0.00457	0	0
d__Bacteria|p__Firmicutes|c__Bacilli|o__Lactobacillales|f__Lactobacillaceae|g__Ligilactobacillus	51.2583	41.2957	13.4686	44.6847	18.7995	11.583	2.78685	1.53844	0.52594	5.85182	7.17935	8.10575
d__Bacteria|p__Firmicutes|c__Bacilli|o__Lactobacillales|f__Lactobacillaceae|g__Ligilactobacillus|s__Ligilactobacillus_unclassified	51.2583	41.2957	13.4686	44.6847	18.7995	11.583	2.78685	1.53844	0.52594	5.85182	7.17935	8.10575
d__Bacteria|p__Firmicutes|c__Bacilli|o__Lactobacillales|f__Lactobacillaceae|g__Limosilactobacillus	0.00305	0	0	0.01718	0	0	0	0	0	0	0	0.01429
d__Bacteria|p__Firmicutes|c__Bacilli|o__Lactobacillales|f__Lactobacillaceae|g__Limosilactobacillus|s__Limosilactobacillus_unclassified	0.00305	0	0	0.01718	0	0	0	0	0	0	0	0.01429
d__Bacteria|p__Firmicutes|c__Bacilli|o__Lactobacillales|f__Lactobacillaceae|g__Weissella	0	0	0	0	0.01847	0.24746	0.01647	0	0.02974	0	0	0.03144
d__Bacteria|p__Firmicutes|c__Bacilli|o__Lactobacillales|f__Lactobacillaceae|g__Weissella|s__Weissella_unclassified	0	0	0	0	0.01847	0.24746	0.01647	0	0.02974	0	0	0.03144
d__Bacteria|p__Firmicutes|c__Bacilli|o__Lactobacillales|f__Streptococcaceae	0.51368	0.62194	0.40397	0.57931	0.78652	0.48262	0.78017	0.54643	0.37097	0.63785	1.61184	0.87604
d__Bacteria|p__Firmicutes|c__Bacilli|o__Lactobacillales|f__Streptococcaceae|g__Streptococcus	0.51368	0.62194	0.40397	0.57931	0.78652	0.48262	0.78017	0.54643	0.37097	0.63785	1.61184	0.87604
d__Bacteria|p__Firmicutes|c__Bacilli|o__Lactobacillales|f__Streptococcaceae|g__Streptococcus|s__Streptococcus_constellatus	0	0	0	0	0.00924	0	0	0	0	0	0	0
d__Bacteria|p__Firmicutes|c__Bacilli|o__Lactobacillales|f__Streptococcaceae|g__Streptococcus|s__Streptococcus_danieliae	0.11432	0.21265	0.01524	0.22954	0.24781	0.09376	0.39534	0.10838	0.07513	0.26184	1.20552	0.58449
d__Bacteria|p__Firmicutes|c__Bacilli|o__Lactobacillales|f__Streptococcaceae|g__Streptococcus|s__Streptococcus_equinus	0	0.14565	0	0	0	0	0	0	0	0.16289	0	0
d__Bacteria|p__Firmicutes|c__Bacilli|o__Lactobacillales|f__Streptococcaceae|g__Streptococcus|s__Streptococcus_ferus	0.08536	0.03496	0.06098	0.03748	0.14006	0.09222	0.06888	0.08129	0.06105	0.03501	0.06274	0.06431
d__Bacteria|p__Firmicutes|c__Bacilli|o__Lactobacillales|f__Streptococcaceae|g__Streptococcus|s__Streptococcus_hyointestinalis	0	0.01311	0.01524	0.02342	0.01539	0.02306	0.02845	0.02409	0.01565	0.01218	0.0239	0.00715
d__Bacteria|p__Firmicutes|c__Bacilli|o__Lactobacillales|f__Streptococcaceae|g__Streptococcus|s__Streptococcus_parasanguinis	0.03201	0	0	0	0	0	0.03294	0	0	0	0	0
d__Bacteria|p__Firmicutes|c__Bacilli|o__Lactobacillales|f__Streptococcaceae|g__Streptococcus|s__Streptococcus_sp.	0	0	0	0	0	0	0.01497	0	0	0	0	0
d__Bacteria|p__Firmicutes|c__Bacilli|o__Lactobacillales|f__Streptococcaceae|g__Streptococcus|s__Streptococcus_sp._GDLAMI-SD2	0.06097	0.04515	0.05488	0.05153	0	0.04918	0	0.07527	0.03444	0.0548	0.0478	0.05288
d__Bacteria|p__Firmicutes|c__Bacilli|o__Lactobacillales|f__Streptococcaceae|g__Streptococcus|s__Streptococcus_sp._NUM_1428	0.13566	0.067	0.21952	0.09525	0.22472	0.13833	0.18569	0.22429	0.12366	0.05633	0.20914	0.09861
d__Bacteria|p__Firmicutes|c__Bacilli|o__Lactobacillales|f__Streptococcaceae|g__Streptococcus|s__Streptococcus_sp._enrichment_culture	0	0	0	0	0	0	0.00299	0.00602	0	0	0	0
d__Bacteria|p__Firmicutes|c__Bacilli|o__Lactobacillales|f__Streptococcaceae|g__Streptococcus|s__Streptococcus_thoraltensis	0	0.00583	0	0	0	0	0	0	0	0	0	0
d__Bacteria|p__Firmicutes|c__Bacilli|o__Lactobacillales|f__Streptococcaceae|g__Streptococcus|s__Streptococcus_unclassified	0.01982	0	0	0.04528	0.10466	0.03689	0.01647	0.00903	0.01252	0	0	0.03573
d__Bacteria|p__Firmicutes|c__Bacilli|o__Lactobacillales|f__Streptococcaceae|g__Streptococcus|s__uncultured_Streptococcus_sp.	0.06554	0.09759	0.03811	0.09681	0.04464	0.04918	0.03444	0.01806	0.04852	0.0548	0.06274	0.03287
d__Bacteria|p__Firmicutes|c__Bacilli|o__Mycoplasmatales	2.67358	5.16197	0.68601	5.66972	5.0608	0.11374	0.17521	0.07677	0.01096	0.07916	0.24798	0.07574
d__Bacteria|p__Firmicutes|c__Bacilli|o__Mycoplasmatales|f__Mycoplasmataceae	2.67358	5.16197	0.68601	5.66972	5.0608	0.11374	0.17521	0.07677	0.01096	0.07916	0.24798	0.07574
d__Bacteria|p__Firmicutes|c__Bacilli|o__Mycoplasmatales|f__Mycoplasmataceae|g__Mycoplasma	2.67358	5.16197	0.68601	5.66972	5.0608	0.11374	0.17521	0.07677	0.01096	0.07916	0.24798	0.07574
d__Bacteria|p__Firmicutes|c__Bacilli|o__Mycoplasmatales|f__Mycoplasmataceae|g__Mycoplasma|s__Mycoplasma_unclassified	2.67358	5.16197	0.68601	5.66972	5.0608	0.11374	0.17521	0.07677	0.01096	0.07916	0.24798	0.07574
d__Bacteria|p__Firmicutes|c__Bacilli|o__Paenibacillales	0	0	0	0	0	0	0	0	0	0	0	0
d__Bacteria|p__Firmicutes|c__Bacilli|o__Paenibacillales|f__Paenibacillaceae	0	0	0	0	0	0	0	0	0	0	0	0
d__Bacteria|p__Firmicutes|c__Bacilli|o__Paenibacillales|f__Paenibacillaceae|g__Paenibacillus	0	0	0	0	0	0	0	0	0	0	0	0
d__Bacteria|p__Firmicutes|c__Bacilli|o__Paenibacillales|f__Paenibacillaceae|g__Paenibacillus|s__Paenibacillus_unclassified	0	0	0	0	0	0	0	0	0	0	0	0
d__Bacteria|p__Firmicutes|c__Bacilli|o__RF39	0.05792	0.27529	0.12196	0.64489	0.1847	0.00922	0.23061	0.29956	0.04383	0.40494	0.13295	0.2115
d__Bacteria|p__Firmicutes|c__Bacilli|o__RF39|f__RF39_unclassified	0.05792	0.27529	0.12196	0.64489	0.1847	0.00922	0.23061	0.29956	0.04383	0.40494	0.13295	0.2115
d__Bacteria|p__Firmicutes|c__Bacilli|o__RF39|f__RF39_unclassified|g__RF39_unclassified	0.05792	0.27529	0.12196	0.64489	0.1847	0.00922	0.23061	0.29956	0.04383	0.40494	0.13295	0.2115
d__Bacteria|p__Firmicutes|c__Bacilli|o__RF39|f__RF39_unclassified|g__RF39_unclassified|s__RF39_unclassified	0.05792	0.27529	0.12196	0.64489	0.1847	0.00922	0.23061	0.29956	0.04383	0.40494	0.13295	0.2115
d__Bacteria|p__Firmicutes|c__Bacilli|o__Staphylococcales	0.08841	0.25926	0.125	0.18581	0.03848	0.15217	0.06289	0.08279	0.07357	0.09895	0.15835	0.08717
d__Bacteria|p__Firmicutes|c__Bacilli|o__Staphylococcales|f__Gemellaceae	0.0625	0.05826	0.08994	0.04372	0.02155	0.13526	0.03294	0.04666	0.04539	0.08373	0.13594	0.06288
d__Bacteria|p__Firmicutes|c__Bacilli|o__Staphylococcales|f__Gemellaceae|g__Gemella	0.0625	0.05826	0.08994	0.04372	0.02155	0.13526	0.03294	0.04666	0.04539	0.08373	0.13594	0.06288
d__Bacteria|p__Firmicutes|c__Bacilli|o__Staphylococcales|f__Gemellaceae|g__Gemella|s__Gemella_unclassified	0.0625	0.05826	0.08994	0.04372	0.02155	0.13526	0.03294	0.04666	0.04539	0.08373	0.13594	0.06288
d__Bacteria|p__Firmicutes|c__Bacilli|o__Staphylococcales|f__Staphylococcaceae	0.02591	0.201	0.03506	0.14209	0.01693	0.01691	0.02995	0.03613	0.02818	0.01522	0.02241	0.02429
d__Bacteria|p__Firmicutes|c__Bacilli|o__Staphylococcales|f__Staphylococcaceae|g__Staphylococcaceae_unclassified	0.02591	0.18352	0.03506	0.14209	0.01693	0.01076	0.01048	0.00903	0	0.01522	0	0
d__Bacteria|p__Firmicutes|c__Bacilli|o__Staphylococcales|f__Staphylococcaceae|g__Staphylococcaceae_unclassified|s__Staphylococcaceae_unclassified	0.02591	0.18352	0.03506	0.14209	0.01693	0.01076	0.01048	0.00903	0	0.01522	0	0
d__Bacteria|p__Firmicutes|c__Bacilli|o__Staphylococcales|f__Staphylococcaceae|g__Staphylococcus	0	0.01748	0	0	0	0.00615	0.01947	0.0271	0.02818	0	0.02241	0.02429
d__Bacteria|p__Firmicutes|c__Bacilli|o__Staphylococcales|f__Staphylococcaceae|g__Staphylococcus|s__Staphylococcus_unclassified	0	0.01748	0	0	0	0.00615	0.01947	0.0271	0.02818	0	0.02241	0.02429
d__Bacteria|p__Firmicutes|c__Clostridia	24.2801	15.2136	19.0359	21.3797	52.2026	19.1805	44.6688	35.4879	44.5465	38.5956	54.2096	22.5766
d__Bacteria|p__Firmicutes|c__Clostridia|o__Christensenellales	0.00762	0.02767	0.12044	0.00468	0.05541	0.03689	0.00749	0.04516	0.00939	0.05024	0.01792	0.01143
d__Bacteria|p__Firmicutes|c__Clostridia|o__Christensenellales|f__Christensenellaceae	0.00762	0.02767	0.12044	0.00468	0.05541	0.03689	0.00749	0.04516	0.00939	0.05024	0.01792	0.01143
d__Bacteria|p__Firmicutes|c__Clostridia|o__Christensenellales|f__Christensenellaceae|g__Christensenellaceae_R-7_group	0	0.00874	0.0808	0	0	0.0123	0	0.0271	0.00939	0.03349	0.00896	0.01143
d__Bacteria|p__Firmicutes|c__Clostridia|o__Christensenellales|f__Christensenellaceae|g__Christensenellaceae_R-7_group|s__Christensenellaceae_R-7_group_unclassified	0	0.00874	0.0808	0	0	0.0123	0	0.0271	0.00939	0.03349	0.00896	0.01143
d__Bacteria|p__Firmicutes|c__Clostridia|o__Christensenellales|f__Christensenellaceae|g__Christensenellaceae_unclassified	0.00762	0.01893	0.03964	0.00468	0.05541	0.02459	0.00749	0.01806	0	0.01675	0.00896	0
d__Bacteria|p__Firmicutes|c__Clostridia|o__Christensenellales|f__Christensenellaceae|g__Christensenellaceae_unclassified|s__Christensenellaceae_unclassified	0.00762	0.01893	0.03964	0.00468	0.05541	0.02459	0.00749	0.01806	0	0.01675	0.00896	0
d__Bacteria|p__Firmicutes|c__Clostridia|o__Clostridia_UCG-014	1.4069	5.01631	4.07641	3.57578	1.98091	3.37376	1.57537	4.74778	1.21153	8.93909	2.33635	9.21472
d__Bacteria|p__Firmicutes|c__Clostridia|o__Clostridia_UCG-014|f__Clostridia_UCG-014_unclassified	1.4069	5.01631	4.07641	3.57578	1.98091	3.37376	1.57537	4.74778	1.21153	8.93909	2.33635	9.21472
d__Bacteria|p__Firmicutes|c__Clostridia|o__Clostridia_UCG-014|f__Clostridia_UCG-014_unclassified|g__Clostridia_UCG-014_unclassified	1.4069	5.01631	4.07641	3.57578	1.98091	3.37376	1.57537	4.74778	1.21153	8.93909	2.33635	9.21472
d__Bacteria|p__Firmicutes|c__Clostridia|o__Clostridia_UCG-014|f__Clostridia_UCG-014_unclassified|g__Clostridia_UCG-014_unclassified|s__Clostridia_UCG-014_unclassified	1.4069	5.01631	4.07641	3.57578	1.98091	3.37376	1.57537	4.74778	1.21153	8.93909	2.33635	9.21472
d__Bacteria|p__Firmicutes|c__Clostridia|o__Clostridia_vadinBB60_group	0.24846	0.15002	0.12805	0.01874	0.31399	0.03381	0.19917	0.09333	0.16749	0.08068	0.46309	0.0686
d__Bacteria|p__Firmicutes|c__Clostridia|o__Clostridia_vadinBB60_group|f__Clostridia_vadinBB60_group_unclassified	0.24846	0.15002	0.12805	0.01874	0.31399	0.03381	0.19917	0.09333	0.16749	0.08068	0.46309	0.0686
d__Bacteria|p__Firmicutes|c__Clostridia|o__Clostridia_vadinBB60_group|f__Clostridia_vadinBB60_group_unclassified|g__Clostridia_vadinBB60_group_unclassified	0.24846	0.15002	0.12805	0.01874	0.31399	0.03381	0.19917	0.09333	0.16749	0.08068	0.46309	0.0686
d__Bacteria|p__Firmicutes|c__Clostridia|o__Clostridia_vadinBB60_group|f__Clostridia_vadinBB60_group_unclassified|g__Clostridia_vadinBB60_group_unclassified|s__Clostridia_vadinBB60_group_unclassified	0.24846	0.15002	0.12805	0.01874	0.31399	0.03381	0.19917	0.09333	0.16749	0.08068	0.46309	0.0686
d__Bacteria|p__Firmicutes|c__Clostridia|o__Clostridiales	10.583	3.81616	7.70158	8.43352	22.1287	8.19077	20.3135	16.5976	16.9004	16.7608	26.2078	3.54412
d__Bacteria|p__Firmicutes|c__Clostridia|o__Clostridiales|f__Clostridiaceae	0.91303	0.61176	0.67991	1.14768	2.73819	1.01137	1.0662	0.58255	0.88596	0.68962	1.33101	0.34585
d__Bacteria|p__Firmicutes|c__Clostridia|o__Clostridiales|f__Clostridiaceae|g__Butyricicoccus	0.00305	0	0	0	0	0	0	0	0	0	0.00747	0
d__Bacteria|p__Firmicutes|c__Clostridia|o__Clostridiales|f__Clostridiaceae|g__Butyricicoccus|s__Butyricicoccus_sp.	0	0	0	0	0	0	0	0	0	0	0.00747	0
d__Bacteria|p__Firmicutes|c__Clostridia|o__Clostridiales|f__Clostridiaceae|g__Butyricicoccus|s__uncultured_Butyricicoccus_sp.	0.00305	0	0	0	0	0	0	0	0	0	0	0
d__Bacteria|p__Firmicutes|c__Clostridia|o__Clostridiales|f__Clostridiaceae|g__Candidatus_Arthromitus	0.39173	0.29859	0.01372	0.46688	1.24673	0.37042	0.00449	0	0.0047	0.02588	0.0254	0.17149
d__Bacteria|p__Firmicutes|c__Clostridia|o__Clostridiales|f__Clostridiaceae|g__Candidatus_Arthromitus|s__Candidatus_Arthromitus_sp._SFB-mouse	0.36887	0.29859	0.01372	0.46688	1.24365	0.37042	0.00449	0	0.0047	0.02588	0.0254	0.17149
d__Bacteria|p__Firmicutes|c__Clostridia|o__Clostridiales|f__Clostridiaceae|g__Candidatus_Arthromitus|s__Candidatus_Arthromitus_unclassified	0.02286	0	0	0	0.00308	0	0	0	0	0	0	0
d__Bacteria|p__Firmicutes|c__Clostridia|o__Clostridiales|f__Clostridiaceae|g__Clostridiaceae_unclassified	0	0	0	0	0	0	0	0	0	0	0	0
d__Bacteria|p__Firmicutes|c__Clostridia|o__Clostridiales|f__Clostridiaceae|g__Clostridiaceae_unclassified|s__Clostridiaceae_unclassified	0	0	0	0	0	0	0	0	0	0	0	0
d__Bacteria|p__Firmicutes|c__Clostridia|o__Clostridiales|f__Clostridiaceae|g__Clostridium	0.51825	0.30006	0.66619	0.67299	1.48376	0.6348	1.04224	0.58255	0.88126	0.66374	1.28918	0.17436
d__Bacteria|p__Firmicutes|c__Clostridia|o__Clostridiales|f__Clostridiaceae|g__Clostridium_sensu_stricto_1	0	0.01311	0	0.00781	0.0077	0.00615	0.01348	0	0	0	0.00896	0
d__Bacteria|p__Firmicutes|c__Clostridia|o__Clostridiales|f__Clostridiaceae|g__Clostridium_sensu_stricto_1|s__Clostridium_sensu_stricto_1_unclassified	0	0.01311	0	0.00781	0.0077	0.00615	0.01348	0	0	0	0.00896	0
d__Bacteria|p__Firmicutes|c__Clostridia|o__Clostridiales|f__Clostridiaceae|g__Clostridium|s__Clostridium_fusiformis	0.02286	0	0	0	0	0	0	0	0	0	0.10158	0
d__Bacteria|p__Firmicutes|c__Clostridia|o__Clostridiales|f__Clostridiaceae|g__Clostridium|s__Clostridium_sp._A9	0	0	0	0.01249	0.06772	0.01691	0	0	0	0	0.08664	0
d__Bacteria|p__Firmicutes|c__Clostridia|o__Clostridiales|f__Clostridiaceae|g__Clostridium|s__Clostridium_sp._AT4	0	0	0	0	0	0	0.0584	0	0.30836	0	0	0
d__Bacteria|p__Firmicutes|c__Clostridia|o__Clostridiales|f__Clostridiaceae|g__Clostridium|s__Clostridium_sp._Clone-1	0.06859	0.01748	0	0	0.07388	0	0.12878	0	0	0	0.17478	0
d__Bacteria|p__Firmicutes|c__Clostridia|o__Clostridiales|f__Clostridiaceae|g__Clostridium|s__Clostridium_sp._Clone-17	0.05487	0.11944	0.09604	0.37944	0.2201	0.08454	0.20516	0.33418	0.08296	0.38363	0.08664	0.09289
d__Bacteria|p__Firmicutes|c__Clostridia|o__Clostridiales|f__Clostridiaceae|g__Clostridium|s__Clostridium_sp._Clone-24	0.02439	0.0102	0	0	0.09543	0.06455	0.05091	0	0	0	0.08963	0
d__Bacteria|p__Firmicutes|c__Clostridia|o__Clostridiales|f__Clostridiaceae|g__Clostridium|s__Clostridium_sp._Clone-40	0	0	0	0	0	0	0	0	0.01096	0	0	0
d__Bacteria|p__Firmicutes|c__Clostridia|o__Clostridiales|f__Clostridiaceae|g__Clostridium|s__Clostridium_sp._Clone-49	0.01372	0	0	0	0.06157	0	0	0.01806	0.01722	0	0	0
d__Bacteria|p__Firmicutes|c__Clostridia|o__Clostridiales|f__Clostridiaceae|g__Clostridium|s__Clostridium_sp._Clone-7	0.03353	0	0.02592	0	0.29552	0.0538	0.20965	0.03462	0.02035	0.03501	0.20914	0.02144
d__Bacteria|p__Firmicutes|c__Clostridia|o__Clostridiales|f__Clostridiaceae|g__Clostridium|s__Clostridium_sp._Culture-1	0.09908	0	0.17074	0.18113	0.25858	0.04611	0.07038	0.05871	0.29427	0.08982	0.16731	0.02001
d__Bacteria|p__Firmicutes|c__Clostridia|o__Clostridiales|f__Clostridiaceae|g__Clostridium|s__Clostridium_sp._Culture-41	0.12804	0.13546	0.32776	0.09993	0.1416	0.35659	0.10932	0.07978	0.08766	0.07916	0.05677	0.03287
d__Bacteria|p__Firmicutes|c__Clostridia|o__Clostridiales|f__Clostridiaceae|g__Clostridium|s__Clostridium_sp._Marseille-P3122	0.03506	0	0.02744	0	0.13237	0	0.02096	0	0	0	0.12399	0
d__Bacteria|p__Firmicutes|c__Clostridia|o__Clostridiales|f__Clostridiaceae|g__Clostridium|s__uncultured_Clostridium_sp.	0.03811	0.01748	0.01829	0	0.13699	0.0123	0.18868	0.0572	0.05948	0.07612	0.1927	0.00715
d__Bacteria|p__Firmicutes|c__Clostridia|o__Clostridiales|f__Clostridiaceae|g__Proteiniclasticum	0	0	0	0	0	0	0.00599	0	0	0	0	0
d__Bacteria|p__Firmicutes|c__Clostridia|o__Clostridiales|f__Clostridiaceae|g__Proteiniclasticum|s__uncultured_Proteiniclasticum_sp.	0	0	0	0	0	0	0.00599	0	0	0	0	0
d__Bacteria|p__Firmicutes|c__Clostridia|o__Clostridiales|f__Clostridiales_Family_IV._Incertae_Sedis	0	0	0	0	0.00308	0	0	0	0	0	0	0
d__Bacteria|p__Firmicutes|c__Clostridia|o__Clostridiales|f__Clostridiales_Family_IV._Incertae_Sedis|g__Clostridiales_Family_IV._Incertae_Sedis_unclassified	0	0	0	0	0.00308	0	0	0	0	0	0	0
d__Bacteria|p__Firmicutes|c__Clostridia|o__Clostridiales|f__Clostridiales_Family_IV._Incertae_Sedis|g__Clostridiales_Family_IV._Incertae_Sedis_unclassified|s__Clostridiales_Family_IV._Incertae_Sedis_unclassified	0	0	0	0	0.00308	0	0	0	0	0	0	0
d__Bacteria|p__Firmicutes|c__Clostridia|o__Clostridiales|f__Clostridiales_Family_XII._Incertae_Sedis	0	0	0	0	0.00616	0	0	0	0	0	0	0
d__Bacteria|p__Firmicutes|c__Clostridia|o__Clostridiales|f__Clostridiales_Family_XII._Incertae_Sedis|g__Acidaminobacter	0	0	0	0	0.00616	0	0	0	0	0	0	0
d__Bacteria|p__Firmicutes|c__Clostridia|o__Clostridiales|f__Clostridiales_Family_XII._Incertae_Sedis|g__Acidaminobacter|s__uncultured_Acidaminobacter_sp.	0	0	0	0	0.00616	0	0	0	0	0	0	0
d__Bacteria|p__Firmicutes|c__Clostridia|o__Clostridiales|f__Clostridiales_Family_XIII._Incertae_Sedis	0	0	0.02134	0	0.00462	0.00769	0.00299	0	0	0	0	0
d__Bacteria|p__Firmicutes|c__Clostridia|o__Clostridiales|f__Clostridiales_Family_XIII._Incertae_Sedis|g__Anaerovorax	0	0	0	0	0.00462	0	0.00299	0	0	0	0	0
d__Bacteria|p__Firmicutes|c__Clostridia|o__Clostridiales|f__Clostridiales_Family_XIII._Incertae_Sedis|g__Anaerovorax|s__uncultured_Anaerovorax_sp.	0	0	0	0	0.00462	0	0.00299	0	0	0	0	0
d__Bacteria|p__Firmicutes|c__Clostridia|o__Clostridiales|f__Clostridiales_Family_XIII._Incertae_Sedis|g__Clostridiales_Family_XIII._Incertae_Sedis_unclassified	0	0	0.02134	0	0	0.00769	0	0	0	0	0	0
d__Bacteria|p__Firmicutes|c__Clostridia|o__Clostridiales|f__Clostridiales_Family_XIII._Incertae_Sedis|g__Clostridiales_Family_XIII._Incertae_Sedis_unclassified|s__Clostridiales_Family_XIII._Incertae_Sedis_unclassified	0	0	0.02134	0	0	0.00769	0	0	0	0	0	0
d__Bacteria|p__Firmicutes|c__Clostridia|o__Clostridiales|f__Clostridiales_Family_XIV._Incertae_Sedis	0.03506	0.01311	0.00305	0	0.08927	0.00615	0	0.01806	0	0.01827	0.04631	0
d__Bacteria|p__Firmicutes|c__Clostridia|o__Clostridiales|f__Clostridiales_Family_XIV._Incertae_Sedis|g__Clostridiales_Family_XIV._Incertae_Sedis_unclassified	0.03506	0.01311	0.00305	0	0.08927	0.00615	0	0.01806	0	0.01827	0.04631	0
d__Bacteria|p__Firmicutes|c__Clostridia|o__Clostridiales|f__Clostridiales_Family_XIV._Incertae_Sedis|g__Clostridiales_Family_XIV._Incertae_Sedis_unclassified|s__Clostridiales_Family_XIV._Incertae_Sedis_unclassified	0.03506	0.01311	0.00305	0	0.08927	0.00615	0	0.01806	0	0.01827	0.04631	0
d__Bacteria|p__Firmicutes|c__Clostridia|o__Clostridiales|f__Clostridiales_unclassified	5.13985	1.33127	1.52751	2.84813	11.1821	2.42234	8.8053	4.01469	2.27436	4.30666	12.1702	0.83887
d__Bacteria|p__Firmicutes|c__Clostridia|o__Clostridiales|f__Clostridiales_unclassified|g__Clostridiales_unclassified	5.13985	1.33127	1.52751	2.84813	11.1821	2.42234	8.8053	4.01469	2.27436	4.30666	12.1702	0.83887
d__Bacteria|p__Firmicutes|c__Clostridia|o__Clostridiales|f__Clostridiales_unclassified|g__Clostridiales_unclassified|s__Clostridiales_unclassified	5.13985	1.33127	1.52751	2.84813	11.1821	2.42234	8.8053	4.01469	2.27436	4.30666	12.1702	0.83887
d__Bacteria|p__Firmicutes|c__Clostridia|o__Clostridiales|f__Eubacteriaceae	0.01219	0.00874	0.00762	0	0.01539	0.02306	0.01198	0	0.04226	0	0.02839	0
d__Bacteria|p__Firmicutes|c__Clostridia|o__Clostridiales|f__Eubacteriaceae|g__Eubacterium	0.01219	0.00874	0.00762	0	0.01539	0.02306	0.01198	0	0.04226	0	0.02839	0
d__Bacteria|p__Firmicutes|c__Clostridia|o__Clostridiales|f__Eubacteriaceae|g__Eubacterium|s__Eubacterium_plexicaudatum	0.01219	0.00874	0	0	0.01539	0.0123	0.01198	0	0.04226	0	0.01793	0
d__Bacteria|p__Firmicutes|c__Clostridia|o__Clostridiales|f__Eubacteriaceae|g__Eubacterium|s__Eubacterium_ramulus	0	0	0.00762	0	0	0	0	0	0	0	0.01046	0
d__Bacteria|p__Firmicutes|c__Clostridia|o__Clostridiales|f__Eubacteriaceae|g__Eubacterium|s__uncultured_Eubacterium_sp.	0	0	0	0	0	0.01076	0	0	0	0	0	0
d__Bacteria|p__Firmicutes|c__Clostridia|o__Clostridiales|f__Lachnospiraceae	4.14296	1.36479	5.16793	3.90681	7.29569	4.48346	8.92056	10.5568	11.1464	9.79769	11.5846	2.01357
d__Bacteria|p__Firmicutes|c__Clostridia|o__Clostridiales|f__Lachnospiraceae|g__Acetatifactor	0.05335	0.01457	0.06708	0.089	0.10312	0.0415	0.15274	0.06623	0.21288	0.0548	0.13743	0.00857
d__Bacteria|p__Firmicutes|c__Clostridia|o__Clostridiales|f__Lachnospiraceae|g__Acetatifactor|s__Acetatifactor_sp.	0.05335	0.01457	0.06708	0.089	0.10312	0.0415	0.15274	0.06623	0.21288	0.0548	0.13743	0.00857
d__Bacteria|p__Firmicutes|c__Clostridia|o__Clostridiales|f__Lachnospiraceae|g__Anaerobium	0	0	0	0	0	0	0	0	0	0	0	0
d__Bacteria|p__Firmicutes|c__Clostridia|o__Clostridiales|f__Lachnospiraceae|g__Anaerobium|s__Anaerobium_sp.	0	0	0	0	0	0	0	0	0	0	0	0
d__Bacteria|p__Firmicutes|c__Clostridia|o__Clostridiales|f__Lachnospiraceae|g__Anaerostipes	0.04573	0	0	0.00781	0.04771	0	0.02695	0.01204	0.00313	0.01066	0.121	0.01286
d__Bacteria|p__Firmicutes|c__Clostridia|o__Clostridiales|f__Lachnospiraceae|g__Anaerostipes|s__Anaerostipes_sp.	0.04573	0	0	0.00781	0.04771	0	0.02695	0.01204	0	0.01066	0.121	0.01286
d__Bacteria|p__Firmicutes|c__Clostridia|o__Clostridiales|f__Lachnospiraceae|g__Anaerostipes|s__Anaerostipes_sp._IE4	0	0	0	0	0	0	0	0	0.00313	0	0	0
d__Bacteria|p__Firmicutes|c__Clostridia|o__Clostridiales|f__Lachnospiraceae|g__Anaerotignum	0.22559	0.23159	0.1494	0.13429	0.39557	0.76082	0.15574	0.09333	0.46019	0.04415	0.09411	0.06717
d__Bacteria|p__Firmicutes|c__Clostridia|o__Clostridiales|f__Lachnospiraceae|g__Anaerotignum|s__Anaerotignum_sp.	0.22559	0.23159	0.1494	0.13429	0.39557	0.76082	0.15574	0.09333	0.46019	0.04415	0.09411	0.06717
d__Bacteria|p__Firmicutes|c__Clostridia|o__Clostridiales|f__Lachnospiraceae|g__Blautia	0	0	0	0	0	0	0	0	0	0	0.01195	0
d__Bacteria|p__Firmicutes|c__Clostridia|o__Clostridiales|f__Lachnospiraceae|g__Blautia|s__uncultured_Blautia_sp.	0	0	0	0	0	0	0	0	0	0	0.01195	0
d__Bacteria|p__Firmicutes|c__Clostridia|o__Clostridiales|f__Lachnospiraceae|g__Coprococcus	0.10974	0	0	0	0.14315	0.00307	0.02246	0.00903	0	0.00761	0.38989	0
d__Bacteria|p__Firmicutes|c__Clostridia|o__Clostridiales|f__Lachnospiraceae|g__Coprococcus|s__Coprococcus_sp.	0.0945	0	0	0	0.08158	0	0.02246	0	0	0	0.37495	0
d__Bacteria|p__Firmicutes|c__Clostridia|o__Clostridiales|f__Lachnospiraceae|g__Coprococcus|s__uncultured_Coprococcus_sp.	0.01524	0	0	0	0.06157	0.00307	0	0.00903	0	0.00761	0.01494	0
d__Bacteria|p__Firmicutes|c__Clostridia|o__Clostridiales|f__Lachnospiraceae|g__Dorea	0	0	0.0061	0	0	0	0	0	0	0	0	0
d__Bacteria|p__Firmicutes|c__Clostridia|o__Clostridiales|f__Lachnospiraceae|g__Dorea|s__uncultured_Dorea_sp.	0	0	0.0061	0	0	0	0	0	0	0	0	0
d__Bacteria|p__Firmicutes|c__Clostridia|o__Clostridiales|f__Lachnospiraceae|g__Eisenbergiella	0.15852	0.00874	0.58539	0.03123	0.95429	0.05533	0.39833	0.15053	0.52281	0.14005	0.45114	0.05573
d__Bacteria|p__Firmicutes|c__Clostridia|o__Clostridiales|f__Lachnospiraceae|g__Eisenbergiella|s__Eisenbergiella_sp.	0.15852	0.00874	0.58539	0.03123	0.95429	0.05533	0.39833	0.15053	0.52281	0.14005	0.45114	0.05573
d__Bacteria|p__Firmicutes|c__Clostridia|o__Clostridiales|f__Lachnospiraceae|g__Hespellia	0	0	0	0	0	0	0	0.00301	0	0	0	0
d__Bacteria|p__Firmicutes|c__Clostridia|o__Clostridiales|f__Lachnospiraceae|g__Hespellia|s__uncultured_Hespellia_sp.	0	0	0	0	0	0	0	0.00301	0	0	0	0
d__Bacteria|p__Firmicutes|c__Clostridia|o__Clostridiales|f__Lachnospiraceae|g__Kineothrix	0.69354	0.11361	0.3491	0.82134	0.1216	0.21364	0.22312	6.68212	0.40854	5.68589	0.2405	0.0686
d__Bacteria|p__Firmicutes|c__Clostridia|o__Clostridiales|f__Lachnospiraceae|g__Kineothrix|s__Kineothrix_alysoides	0.55636	0.08157	0.32928	0.74014	0.02463	0.03535	0.04043	6.1959	0.07044	5.38599	0.12249	0.01715
d__Bacteria|p__Firmicutes|c__Clostridia|o__Clostridiales|f__Lachnospiraceae|g__Kineothrix|s__Kineothrix_sp.	0.13718	0.03204	0.01982	0.0812	0.09697	0.17829	0.18269	0.48622	0.3381	0.2999	0.11801	0.05145
d__Bacteria|p__Firmicutes|c__Clostridia|o__Clostridiales|f__Lachnospiraceae|g__Lachnoclostridium	0.49539	0.12818	0.04421	0.14522	0.84962	0.09683	0.18868	0.17161	0.1127	0.21617	0.12548	0.00429
d__Bacteria|p__Firmicutes|c__Clostridia|o__Clostridiales|f__Lachnospiraceae|g__Lachnoclostridium|s__Lachnoclostridium_sp.	0.49539	0.12818	0.04421	0.14522	0.84962	0.09683	0.18868	0.17161	0.1127	0.21617	0.12548	0.00429
d__Bacteria|p__Firmicutes|c__Clostridia|o__Clostridiales|f__Lachnospiraceae|g__Lachnospira	0.17072	0.01457	0.01677	0.06402	0.07234	0.08915	0.39983	0.03763	0.15966	0.03197	2.41254	0.19721
d__Bacteria|p__Firmicutes|c__Clostridia|o__Clostridiales|f__Lachnospiraceae|g__Lachnospiraceae_unclassified	1.727	0.59864	3.6831	2.53271	3.29691	3.1432	5.48384	2.98957	7.08136	3.16796	6.15608	1.25902
d__Bacteria|p__Firmicutes|c__Clostridia|o__Clostridiales|f__Lachnospiraceae|g__Lachnospiraceae_unclassified|s__Lachnospiraceae_unclassified	1.727	0.59864	3.6831	2.53271	3.29691	3.1432	5.48384	2.98957	7.08136	3.16796	6.15608	1.25902
d__Bacteria|p__Firmicutes|c__Clostridia|o__Clostridiales|f__Lachnospiraceae|g__Lachnospira|s__uncultured_Lachnospira_sp.	0.17072	0.01457	0.01677	0.06402	0.07234	0.08915	0.39983	0.03763	0.15966	0.03197	2.41254	0.19721
d__Bacteria|p__Firmicutes|c__Clostridia|o__Clostridiales|f__Lachnospiraceae|g__Mediterraneibacter	0	0	0.01982	0.00781	0.02617	0	0.02995	0	0.01878	0	0.01942	0
d__Bacteria|p__Firmicutes|c__Clostridia|o__Clostridiales|f__Lachnospiraceae|g__Mediterraneibacter|s__Mediterraneibacter_sp._KCTC_15684	0	0	0.01982	0.00781	0.02617	0	0.02995	0	0.01878	0	0.01942	0
d__Bacteria|p__Firmicutes|c__Clostridia|o__Clostridiales|f__Lachnospiraceae|g__Murimonas	0.03201	0	0	0	0.01847	0.00922	0	0	0	0.01522	0.04481	0
d__Bacteria|p__Firmicutes|c__Clostridia|o__Clostridiales|f__Lachnospiraceae|g__Murimonas|s__Murimonas_sp.	0.03201	0	0	0	0.01847	0.00922	0	0	0	0.01522	0.04481	0
d__Bacteria|p__Firmicutes|c__Clostridia|o__Clostridiales|f__Lachnospiraceae|g__Robinsoniella	0.02591	0	0.0122	0.01249	0.07542	0.0292	0.04941	0.08881	0.04069	0.03045	0.0493	0.03001
d__Bacteria|p__Firmicutes|c__Clostridia|o__Clostridiales|f__Lachnospiraceae|g__Robinsoniella|s__Robinsoniella_peoriensis	0	0	0	0	0	0	0	0.00903	0	0	0	0
d__Bacteria|p__Firmicutes|c__Clostridia|o__Clostridiales|f__Lachnospiraceae|g__Robinsoniella|s__Robinsoniella_sp.	0	0	0.0122	0.01249	0.00308	0.0292	0.04642	0.07075	0.02191	0.03045	0.0493	0.03001
d__Bacteria|p__Firmicutes|c__Clostridia|o__Clostridiales|f__Lachnospiraceae|g__Robinsoniella|s__uncultured_Robinsoniella_sp.	0.02591	0	0	0	0.07234	0	0.00299	0.00903	0.01878	0	0	0
d__Bacteria|p__Firmicutes|c__Clostridia|o__Clostridiales|f__Lachnospiraceae|g__Roseburia	0.29266	0.05243	0.22409	0.00468	0.7388	0.01998	0.93594	0.23332	1.00805	0.37145	0.54226	0.17149
d__Bacteria|p__Firmicutes|c__Clostridia|o__Clostridiales|f__Lachnospiraceae|g__Roseburia|s__Roseburia_sp.	0.17986	0.02039	0.21647	0.00468	0.15238	0.01076	0.04343	0.0572	0.09392	0.10352	0.11951	0.02429
d__Bacteria|p__Firmicutes|c__Clostridia|o__Clostridiales|f__Lachnospiraceae|g__Roseburia|s__Roseburia_sp._831b	0	0	0	0	0.03078	0	0.04343	0	0.12522	0	0	0
d__Bacteria|p__Firmicutes|c__Clostridia|o__Clostridiales|f__Lachnospiraceae|g__Roseburia|s__uncultured_Roseburia_sp.	0.1128	0.03204	0.00762	0	0.55564	0.00922	0.84908	0.17612	0.78891	0.26793	0.42275	0.1472
d__Bacteria|p__Firmicutes|c__Clostridia|o__Clostridiales|f__Lachnospiraceae|g__Tyzzerella	0.1128	0.20246	0.01067	0.05621	0.45252	0.02152	0.85357	0.01957	1.11762	0.02131	0.78874	0.13862
d__Bacteria|p__Firmicutes|c__Clostridia|o__Clostridiales|f__Lachnospiraceae|g__Tyzzerella|s__Tyzzerella_sp.	0.1128	0.20246	0.01067	0.05621	0.45252	0.02152	0.85357	0.01957	1.11762	0.02131	0.78874	0.13862
d__Bacteria|p__Firmicutes|c__Clostridia|o__Clostridiales|f__Oscillospiraceae	0.13261	0.13109	0.03659	0.01874	0.10621	0	0.43876	0.79631	1.52459	1.09151	0.61695	0.1572
d__Bacteria|p__Firmicutes|c__Clostridia|o__Clostridiales|f__Oscillospiraceae|g__Oscillibacter	0.13261	0.13109	0.03659	0.01874	0.10621	0	0.43876	0.79631	1.52459	1.09151	0.61695	0.1572
d__Bacteria|p__Firmicutes|c__Clostridia|o__Clostridiales|f__Oscillospiraceae|g__Oscillibacter|s__Oscillibacter_sp.	0.1006	0.13109	0.03659	0.01874	0.06157	0	0.40432	0.79631	1.5152	1.0839	0.51985	0.1572
d__Bacteria|p__Firmicutes|c__Clostridia|o__Clostridiales|f__Oscillospiraceae|g__Oscillibacter|s__uncultured_Oscillibacter_sp.	0.03201	0	0	0	0.04464	0	0.03444	0	0.00939	0.00761	0.0971	0
d__Bacteria|p__Firmicutes|c__Clostridia|o__Clostridiales|f__Ruminococcaceae	0.2073	0.3554	0.25763	0.51216	0.68802	0.2367	1.0677	0.62923	1.02683	0.85706	0.43023	0.18863
d__Bacteria|p__Firmicutes|c__Clostridia|o__Clostridiales|f__Ruminococcaceae|g__Acetivibrio	0.00305	0.00728	0	0	0.0077	0	0.02695	0.01957	0	0.04719	0	0
d__Bacteria|p__Firmicutes|c__Clostridia|o__Clostridiales|f__Ruminococcaceae|g__Acetivibrio|s__Acetivibrio_sp.	0.00305	0	0	0	0.00308	0	0.02695	0	0	0	0	0
d__Bacteria|p__Firmicutes|c__Clostridia|o__Clostridiales|f__Ruminococcaceae|g__Acetivibrio|s__uncultured_Acetivibrio_sp.	0	0.00728	0	0	0.00462	0	0	0.01957	0	0.04719	0	0
d__Bacteria|p__Firmicutes|c__Clostridia|o__Clostridiales|f__Ruminococcaceae|g__Anaerotruncus	0	0	0	0	0	0	0	0.01204	0	0.00609	0.00598	0
d__Bacteria|p__Firmicutes|c__Clostridia|o__Clostridiales|f__Ruminococcaceae|g__Anaerotruncus|s__Anaerotruncus_sp.	0	0	0	0	0	0	0	0.01204	0	0	0.00598	0
d__Bacteria|p__Firmicutes|c__Clostridia|o__Clostridiales|f__Ruminococcaceae|g__Anaerotruncus|s__uncultured_Anaerotruncus_sp.	0	0	0	0	0	0	0	0	0	0.00609	0	0
d__Bacteria|p__Firmicutes|c__Clostridia|o__Clostridiales|f__Ruminococcaceae|g__Bittarella	0	0.00291	0	0	0	0	0	0	0	0	0	0
d__Bacteria|p__Firmicutes|c__Clostridia|o__Clostridiales|f__Ruminococcaceae|g__Bittarella|s__Bittarella_massiliensis	0	0.00291	0	0	0	0	0	0	0	0	0	0
d__Bacteria|p__Firmicutes|c__Clostridia|o__Clostridiales|f__Ruminococcaceae|g__Flavonifractor	0	0.01457	0.0061	0	0	0	0	0	0	0	0	0
d__Bacteria|p__Firmicutes|c__Clostridia|o__Clostridiales|f__Ruminococcaceae|g__Flavonifractor|s__Flavonifractor_sp.	0	0.01457	0.0061	0	0	0	0	0	0	0	0	0
d__Bacteria|p__Firmicutes|c__Clostridia|o__Clostridiales|f__Ruminococcaceae|g__Flavonifractor|s__uncultured_Flavonifractor_sp.	0	0	0	0	0	0	0	0	0	0	0	0
d__Bacteria|p__Firmicutes|c__Clostridia|o__Clostridiales|f__Ruminococcaceae|g__Gorbachella	0	0	0	0	0	0	0.00299	0	0	0	0	0
d__Bacteria|p__Firmicutes|c__Clostridia|o__Clostridiales|f__Ruminococcaceae|g__Gorbachella|s__Gorbachella_massiliensis	0	0	0	0	0	0	0.00299	0	0	0	0	0
d__Bacteria|p__Firmicutes|c__Clostridia|o__Clostridiales|f__Ruminococcaceae|g__Harryflintia	0	0	0	0	0	0	0	0.00602	0	0.00457	0.00448	0
d__Bacteria|p__Firmicutes|c__Clostridia|o__Clostridiales|f__Ruminococcaceae|g__Harryflintia|s__Harryflintia_acetispora	0	0	0	0	0	0	0	0.00602	0	0.00457	0.00448	0
d__Bacteria|p__Firmicutes|c__Clostridia|o__Clostridiales|f__Ruminococcaceae|g__Hydrogenoanaerobacterium	0	0	0.00457	0	0	0	0.00299	0	0	0	0	0
d__Bacteria|p__Firmicutes|c__Clostridia|o__Clostridiales|f__Ruminococcaceae|g__Hydrogenoanaerobacterium|s__uncultured_Hydrogenoanaerobacterium_sp.	0	0	0.00457	0	0	0	0.00299	0	0	0	0	0
d__Bacteria|p__Firmicutes|c__Clostridia|o__Clostridiales|f__Ruminococcaceae|g__Neglecta	0	0	0	0	0	0	0	0	0	0	0.00299	0
d__Bacteria|p__Firmicutes|c__Clostridia|o__Clostridiales|f__Ruminococcaceae|g__Neglecta|s__Neglecta_sp.	0	0	0	0	0	0	0	0	0	0	0.00299	0
d__Bacteria|p__Firmicutes|c__Clostridia|o__Clostridiales|f__Ruminococcaceae|g__Oscillospira	0	0.01602	0.01067	0	0.03386	0.01844	0.01647	0.02258	0	0	0	0
d__Bacteria|p__Firmicutes|c__Clostridia|o__Clostridiales|f__Ruminococcaceae|g__Oscillospira|s__uncultured_Oscillospira_sp.	0	0.01602	0.01067	0	0.03386	0.01844	0.01647	0.02258	0	0	0	0
d__Bacteria|p__Firmicutes|c__Clostridia|o__Clostridiales|f__Ruminococcaceae|g__Pseudoflavonifractor	0	0.15294	0.03049	0.11086	0	0.04304	0.12279	0.05871	0.43202	0.15679	0.06274	0.02429
d__Bacteria|p__Firmicutes|c__Clostridia|o__Clostridiales|f__Ruminococcaceae|g__Pseudoflavonifractor|s__Pseudoflavonifractor_sp.	0	0.15294	0.03049	0.11086	0	0.04304	0.12279	0.05419	0.43202	0.15375	0.03585	0.02429
d__Bacteria|p__Firmicutes|c__Clostridia|o__Clostridiales|f__Ruminococcaceae|g__Pseudoflavonifractor|s__uncultured_Pseudoflavonifractor_sp.	0	0	0	0	0	0	0	0.00452	0	0.00304	0.02689	0
d__Bacteria|p__Firmicutes|c__Clostridia|o__Clostridiales|f__Ruminococcaceae|g__Ruminococcaceae_unclassified	0.17834	0.16168	0.18598	0.4013	0.60336	0.1537	0.65441	0.45762	0.37567	0.60284	0.20316	0.15148
d__Bacteria|p__Firmicutes|c__Clostridia|o__Clostridiales|f__Ruminococcaceae|g__Ruminococcaceae_unclassified|s__Ruminococcaceae_unclassified	0.17834	0.16168	0.18598	0.4013	0.60336	0.1537	0.65441	0.45762	0.37567	0.60284	0.20316	0.15148
d__Bacteria|p__Firmicutes|c__Clostridia|o__Clostridiales|f__Ruminococcaceae|g__Ruminococcus	0.02591	0	0.01982	0	0.0431	0.02152	0.2411	0.05269	0.21914	0.03958	0.15088	0.01286
d__Bacteria|p__Firmicutes|c__Clostridia|o__Clostridiales|f__Ruminococcaceae|g__Ruminococcus|s__Ruminococcus_sp.	0	0	0	0	0	0	0	0	0	0	0.00747	0
d__Bacteria|p__Firmicutes|c__Clostridia|o__Clostridiales|f__Ruminococcaceae|g__Ruminococcus|s__uncultured_Ruminococcus_sp.	0.02591	0	0.01982	0	0.0431	0.02152	0.2411	0.05269	0.21914	0.03958	0.14341	0.01286
d__Bacteria|p__Firmicutes|c__Clostridia|o__Eubacteriales	0	0	0	0.00781	0.00616	0	0	0	0	0.00609	0	0
d__Bacteria|p__Firmicutes|c__Clostridia|o__Eubacteriales|f__Anaerofustaceae	0	0	0	0.00781	0.00616	0	0	0	0	0	0	0
d__Bacteria|p__Firmicutes|c__Clostridia|o__Eubacteriales|f__Anaerofustaceae|g__Anaerofustis	0	0	0	0.00781	0.00616	0	0	0	0	0	0	0
d__Bacteria|p__Firmicutes|c__Clostridia|o__Eubacteriales|f__Anaerofustaceae|g__Anaerofustis|s__Anaerofustis_unclassified	0	0	0	0.00781	0.00616	0	0	0	0	0	0	0
d__Bacteria|p__Firmicutes|c__Clostridia|o__Eubacteriales|f__Eubacteriaceae	0	0	0	0	0	0	0	0	0	0.00609	0	0
d__Bacteria|p__Firmicutes|c__Clostridia|o__Eubacteriales|f__Eubacteriaceae|g__Eubacterium	0	0	0	0	0	0	0	0	0	0.00609	0	0
d__Bacteria|p__Firmicutes|c__Clostridia|o__Eubacteriales|f__Eubacteriaceae|g__Eubacterium|s__Eubacterium_unclassified	0	0	0	0	0	0	0	0	0	0.00609	0	0
d__Bacteria|p__Firmicutes|c__Clostridia|o__Lachnospirales	8.93223	3.56125	3.43918	7.74333	21.6238	4.98457	16.3527	11.6768	22.8908	10.3381	13.0874	6.05502
d__Bacteria|p__Firmicutes|c__Clostridia|o__Lachnospirales|f__Defluviitaleaceae	0	0	0	0	0	0.00922	0	0	0	0	0	0
d__Bacteria|p__Firmicutes|c__Clostridia|o__Lachnospirales|f__Defluviitaleaceae|g__Defluviitaleaceae_UCG-011	0	0	0	0	0	0.00922	0	0	0	0	0	0
d__Bacteria|p__Firmicutes|c__Clostridia|o__Lachnospirales|f__Defluviitaleaceae|g__Defluviitaleaceae_UCG-011|s__Defluviitaleaceae_UCG-011_unclassified	0	0	0	0	0	0.00922	0	0	0	0	0	0
d__Bacteria|p__Firmicutes|c__Clostridia|o__Lachnospirales|f__Lachnospiraceae	8.93223	3.56125	3.43918	7.74333	21.6238	4.97535	16.3527	11.6768	22.8908	10.3381	13.0874	6.05502
d__Bacteria|p__Firmicutes|c__Clostridia|o__Lachnospirales|f__Lachnospiraceae|g__A2	0.24388	0	0.00762	0.33259	0.22472	0	0.60649	0.12946	1.30075	0.29533	1.74479	0.25152
d__Bacteria|p__Firmicutes|c__Clostridia|o__Lachnospirales|f__Lachnospiraceae|g__A2|s__A2_unclassified	0.24388	0	0.00762	0.33259	0.22472	0	0.60649	0.12946	1.30075	0.29533	1.74479	0.25152
d__Bacteria|p__Firmicutes|c__Clostridia|o__Lachnospirales|f__Lachnospiraceae|g__ASF356	0.29571	0.01748	0.02439	0.01249	0.23241	0.00769	0	0.05269	0.10644	0.0137	0.02241	0.01286
d__Bacteria|p__Firmicutes|c__Clostridia|o__Lachnospirales|f__Lachnospiraceae|g__ASF356|s__ASF356_unclassified	0.29571	0.01748	0.02439	0.01249	0.23241	0.00769	0	0.05269	0.10644	0.0137	0.02241	0.01286
d__Bacteria|p__Firmicutes|c__Clostridia|o__Lachnospirales|f__Lachnospiraceae|g__Acetatifactor	0.06859	0.03787	0.13873	0.03591	0.1493	0	0.11531	0.03312	0.36784	0.0274	0.13444	0.02001
d__Bacteria|p__Firmicutes|c__Clostridia|o__Lachnospirales|f__Lachnospiraceae|g__Acetatifactor|s__Acetatifactor_unclassified	0.06859	0.03787	0.13873	0.03591	0.1493	0	0.11531	0.03312	0.36784	0.0274	0.13444	0.02001
d__Bacteria|p__Firmicutes|c__Clostridia|o__Lachnospirales|f__Lachnospiraceae|g__Agathobacter	0	0	0	0.02811	0.0354	0	0	0	0	0	0	0.03001
d__Bacteria|p__Firmicutes|c__Clostridia|o__Lachnospirales|f__Lachnospiraceae|g__Agathobacter|s__Agathobacter_unclassified	0	0	0	0.02811	0.0354	0	0	0	0	0	0	0.03001
d__Bacteria|p__Firmicutes|c__Clostridia|o__Lachnospirales|f__Lachnospiraceae|g__Anaerostipes	0	0	0	0	0	0.0123	0	0.01355	0	0	0	0
d__Bacteria|p__Firmicutes|c__Clostridia|o__Lachnospirales|f__Lachnospiraceae|g__Anaerostipes|s__Anaerostipes_unclassified	0	0	0	0	0	0.0123	0	0.01355	0	0	0	0
d__Bacteria|p__Firmicutes|c__Clostridia|o__Lachnospirales|f__Lachnospiraceae|g__Blautia	0.01372	0.01457	0.00305	0	0.0077	0.09683	0	0	0	0.01218	0	0.02858
d__Bacteria|p__Firmicutes|c__Clostridia|o__Lachnospirales|f__Lachnospiraceae|g__Blautia|s__Blautia_unclassified	0.01372	0.01457	0.00305	0	0.0077	0.09683	0	0	0	0.01218	0	0.02858
d__Bacteria|p__Firmicutes|c__Clostridia|o__Lachnospirales|f__Lachnospiraceae|g__Coprococcus	0	0	0.01067	0	0	0	0	0.00452	0	0	0	0
d__Bacteria|p__Firmicutes|c__Clostridia|o__Lachnospirales|f__Lachnospiraceae|g__Coprococcus|s__Coprococcus_unclassified	0	0	0.01067	0	0	0	0	0.00452	0	0	0	0
d__Bacteria|p__Firmicutes|c__Clostridia|o__Lachnospirales|f__Lachnospiraceae|g__Dorea	0	0.00728	0.58692	0.03123	0	0.19366	0	0.02258	0	0.00609	0.00896	0.02001
d__Bacteria|p__Firmicutes|c__Clostridia|o__Lachnospirales|f__Lachnospiraceae|g__Dorea|s__Dorea_unclassified	0	0.00728	0.58692	0.03123	0	0.19366	0	0.02258	0	0.00609	0.00896	0.02001
d__Bacteria|p__Firmicutes|c__Clostridia|o__Lachnospirales|f__Lachnospiraceae|g__Eubacterium]_oxidoreducens_group	0.00762	0	0	0	0.00308	0	0	0.01505	0.04539	0.00457	0.01195	0
d__Bacteria|p__Firmicutes|c__Clostridia|o__Lachnospirales|f__Lachnospiraceae|g__Eubacterium]_oxidoreducens_group|s__Eubacterium]_oxidoreducens_group_unclassified	0.00762	0	0	0	0.00308	0	0	0.01505	0.04539	0.00457	0.01195	0
d__Bacteria|p__Firmicutes|c__Clostridia|o__Lachnospirales|f__Lachnospiraceae|g__Eubacterium]_ruminantium_group	0.00457	0	0	0	0	0	0.00599	0.00602	0	0.00304	0	0
d__Bacteria|p__Firmicutes|c__Clostridia|o__Lachnospirales|f__Lachnospiraceae|g__Eubacterium]_ruminantium_group|s__Eubacterium]_ruminantium_group_unclassified	0.00457	0	0	0	0	0	0.00599	0.00602	0	0.00304	0	0
d__Bacteria|p__Firmicutes|c__Clostridia|o__Lachnospirales|f__Lachnospiraceae|g__Eubacterium]_ventriosum_group	0.08231	0.01602	0	0	0.11698	0.04918	0.00449	0.08731	0.0047	0.1157	0.00896	1.00607
d__Bacteria|p__Firmicutes|c__Clostridia|o__Lachnospirales|f__Lachnospiraceae|g__Eubacterium]_ventriosum_group|s__Eubacterium]_ventriosum_group_unclassified	0.08231	0.01602	0	0	0.11698	0.04918	0.00449	0.08731	0.0047	0.1157	0.00896	1.00607
d__Bacteria|p__Firmicutes|c__Clostridia|o__Lachnospirales|f__Lachnospiraceae|g__Eubacterium]_xylanophilum_group	0.11127	0.78799	0.03964	0.77605	0.32784	0.11835	0.20965	0.27698	0.11427	0.4841	0.17926	0.11004
d__Bacteria|p__Firmicutes|c__Clostridia|o__Lachnospirales|f__Lachnospiraceae|g__Eubacterium]_xylanophilum_group|s__Eubacterium]_xylanophilum_group_unclassified	0.11127	0.78799	0.03964	0.77605	0.32784	0.11835	0.20965	0.27698	0.11427	0.4841	0.17926	0.11004
d__Bacteria|p__Firmicutes|c__Clostridia|o__Lachnospirales|f__Lachnospiraceae|g__Frisingicoccus	0	0	0	0	0	0	0	0	0	0	0.00299	0
d__Bacteria|p__Firmicutes|c__Clostridia|o__Lachnospirales|f__Lachnospiraceae|g__Frisingicoccus|s__Frisingicoccus_unclassified	0	0	0	0	0	0	0	0	0	0	0.00299	0
d__Bacteria|p__Firmicutes|c__Clostridia|o__Lachnospirales|f__Lachnospiraceae|g__Fusicatenibacter	0.00915	0	0	0.00468	0	0.00615	0	0	0.00313	0	0.00299	0.01286
d__Bacteria|p__Firmicutes|c__Clostridia|o__Lachnospirales|f__Lachnospiraceae|g__Fusicatenibacter|s__Fusicatenibacter_unclassified	0.00915	0	0	0.00468	0	0.00615	0	0	0.00313	0	0.00299	0.01286
d__Bacteria|p__Firmicutes|c__Clostridia|o__Lachnospirales|f__Lachnospiraceae|g__GCA-900066575	0.11584	0.19955	0.15245	0.0203	0.39557	0.06609	0.07338	0.08129	0.12835	0.05176	0.13594	0.05859
d__Bacteria|p__Firmicutes|c__Clostridia|o__Lachnospirales|f__Lachnospiraceae|g__GCA-900066575|s__GCA-900066575_unclassified	0.11584	0.19955	0.15245	0.0203	0.39557	0.06609	0.07338	0.08129	0.12835	0.05176	0.13594	0.05859
d__Bacteria|p__Firmicutes|c__Clostridia|o__Lachnospirales|f__Lachnospiraceae|g__Johnsonella	0.04268	0.04952	0.0686	0.05153	0.06618	0.08146	0.06739	0.03462	0.0407	0.03806	0.08365	0.05716
d__Bacteria|p__Firmicutes|c__Clostridia|o__Lachnospirales|f__Lachnospiraceae|g__Johnsonella|s__Johnsonella_unclassified	0.04268	0.04952	0.0686	0.05153	0.06618	0.08146	0.06739	0.03462	0.0407	0.03806	0.08365	0.05716
d__Bacteria|p__Firmicutes|c__Clostridia|o__Lachnospirales|f__Lachnospiraceae|g__Lachnoclostridium	0	0.01311	0	0	0	0	0	0	0	0	0	0
d__Bacteria|p__Firmicutes|c__Clostridia|o__Lachnospirales|f__Lachnospiraceae|g__Lachnoclostridium|s__Lachnoclostridium_unclassified	0	0.01311	0	0	0	0	0	0	0	0	0	0
d__Bacteria|p__Firmicutes|c__Clostridia|o__Lachnospirales|f__Lachnospiraceae|g__Lachnospira	0	0	0	0	0	0.00769	0	0	0	0	0	0
d__Bacteria|p__Firmicutes|c__Clostridia|o__Lachnospirales|f__Lachnospiraceae|g__Lachnospiraceae_FCS020_group	0.08993	0.00437	0.07317	0.00468	0.27089	0.0123	0.00749	0.00903	0.02035	0.00457	0.05527	0
d__Bacteria|p__Firmicutes|c__Clostridia|o__Lachnospirales|f__Lachnospiraceae|g__Lachnospiraceae_FCS020_group|s__Lachnospiraceae_FCS020_group_unclassified	0.08993	0.00437	0.07317	0.00468	0.27089	0.0123	0.00749	0.00903	0.02035	0.00457	0.05527	0
d__Bacteria|p__Firmicutes|c__Clostridia|o__Lachnospirales|f__Lachnospiraceae|g__Lachnospiraceae_NC2004_group	0	0	0	0	0	0.00307	0	0.00602	0	0.00761	0	0
d__Bacteria|p__Firmicutes|c__Clostridia|o__Lachnospirales|f__Lachnospiraceae|g__Lachnospiraceae_NC2004_group|s__Lachnospiraceae_NC2004_group_unclassified	0	0	0	0	0	0.00307	0	0.00602	0	0.00761	0	0
d__Bacteria|p__Firmicutes|c__Clostridia|o__Lachnospirales|f__Lachnospiraceae|g__Lachnospiraceae_ND3007_group	0	0	0	0	0	0	0	0	0	0	0	0
d__Bacteria|p__Firmicutes|c__Clostridia|o__Lachnospirales|f__Lachnospiraceae|g__Lachnospiraceae_ND3007_group|s__Lachnospiraceae_ND3007_group_unclassified	0	0	0	0	0	0	0	0	0	0	0	0
d__Bacteria|p__Firmicutes|c__Clostridia|o__Lachnospirales|f__Lachnospiraceae|g__Lachnospiraceae_NK3A20_group	0	0	0	0	0	0	0	0	0	0	0	0
d__Bacteria|p__Firmicutes|c__Clostridia|o__Lachnospirales|f__Lachnospiraceae|g__Lachnospiraceae_NK3A20_group|s__Lachnospiraceae_NK3A20_group_unclassified	0	0	0	0	0	0	0	0	0	0	0	0
d__Bacteria|p__Firmicutes|c__Clostridia|o__Lachnospirales|f__Lachnospiraceae|g__Lachnospiraceae_NK4A136_group	6.62907	1.87165	1.98637	4.99828	17.054	4.07003	14.3565	10.0826	20.0122	8.53263	8.87634	4.19721
d__Bacteria|p__Firmicutes|c__Clostridia|o__Lachnospirales|f__Lachnospiraceae|g__Lachnospiraceae_NK4A136_group|s__Lachnospiraceae_NK4A136_group_unclassified	6.62907	1.87165	1.98637	4.99828	17.054	4.07003	14.3565	10.0826	20.0122	8.53263	8.87634	4.19721
d__Bacteria|p__Firmicutes|c__Clostridia|o__Lachnospirales|f__Lachnospiraceae|g__Lachnospiraceae_NK4B4_group	0	0	0	0	0	0	0	0	0	0	0.02689	0
d__Bacteria|p__Firmicutes|c__Clostridia|o__Lachnospirales|f__Lachnospiraceae|g__Lachnospiraceae_NK4B4_group|s__Lachnospiraceae_NK4B4_group_unclassified	0	0	0	0	0	0	0	0	0	0	0.02689	0
d__Bacteria|p__Firmicutes|c__Clostridia|o__Lachnospirales|f__Lachnospiraceae|g__Lachnospiraceae_UCG-001	0.52892	0.13837	0.01067	0.05621	0.66338	0.00922	0.01048	0	0.08139	0.03045	0.03286	0.03716
d__Bacteria|p__Firmicutes|c__Clostridia|o__Lachnospirales|f__Lachnospiraceae|g__Lachnospiraceae_UCG-001|s__Lachnospiraceae_UCG-001_unclassified	0.52892	0.13837	0.01067	0.05621	0.66338	0.00922	0.01048	0	0.08139	0.03045	0.03286	0.03716
d__Bacteria|p__Firmicutes|c__Clostridia|o__Lachnospirales|f__Lachnospiraceae|g__Lachnospiraceae_UCG-006	0.14633	0.03059	0.14787	0.72452	0.07542	0.0538	0.17071	0.71352	0.10018	0.49628	0.17926	0.06717
d__Bacteria|p__Firmicutes|c__Clostridia|o__Lachnospirales|f__Lachnospiraceae|g__Lachnospiraceae_UCG-006|s__Lachnospiraceae_UCG-006_unclassified	0.14633	0.03059	0.14787	0.72452	0.07542	0.0538	0.17071	0.71352	0.10018	0.49628	0.17926	0.06717
d__Bacteria|p__Firmicutes|c__Clostridia|o__Lachnospirales|f__Lachnospiraceae|g__Lachnospiraceae_UCG-010	0.00457	0	0	0	0	0	0.00299	0.00301	0	0	0.00448	0
d__Bacteria|p__Firmicutes|c__Clostridia|o__Lachnospirales|f__Lachnospiraceae|g__Lachnospiraceae_UCG-010|s__Lachnospiraceae_UCG-010_unclassified	0.00457	0	0	0	0	0	0.00299	0.00301	0	0	0.00448	0
d__Bacteria|p__Firmicutes|c__Clostridia|o__Lachnospirales|f__Lachnospiraceae|g__Lachnospiraceae_unclassified	0.48015	0.24324	0.10061	0.64333	1.73773	0.0415	0.49567	0.06924	0.30367	0.06394	1.23988	0.03573
d__Bacteria|p__Firmicutes|c__Clostridia|o__Lachnospirales|f__Lachnospiraceae|g__Lachnospiraceae_unclassified|s__Lachnospiraceae_unclassified	0.48015	0.24324	0.10061	0.64333	1.73773	0.0415	0.49567	0.06924	0.30367	0.06394	1.23988	0.03573
d__Bacteria|p__Firmicutes|c__Clostridia|o__Lachnospirales|f__Lachnospiraceae|g__Lachnospira|s__Lachnospira_unclassified	0	0	0	0	0	0.00769	0	0	0	0	0	0
d__Bacteria|p__Firmicutes|c__Clostridia|o__Lachnospirales|f__Lachnospiraceae|g__Marvinbryantia	0.00762	0	0.07622	0.02342	0.01693	0.0123	0	0.00452	0.01096	0.01066	0.09112	0.05145
d__Bacteria|p__Firmicutes|c__Clostridia|o__Lachnospirales|f__Lachnospiraceae|g__Marvinbryantia|s__Marvinbryantia_unclassified	0.00762	0	0.07622	0.02342	0.01693	0.0123	0	0.00452	0.01096	0.01066	0.09112	0.05145
d__Bacteria|p__Firmicutes|c__Clostridia|o__Lachnospirales|f__Lachnospiraceae|g__Roseburia	0	0	0	0	0.01693	0.04304	0.11381	0.00903	0.23636	0	0.11951	0.02001
d__Bacteria|p__Firmicutes|c__Clostridia|o__Lachnospirales|f__Lachnospiraceae|g__Roseburia|s__Roseburia_unclassified	0	0	0	0	0.01693	0.04304	0.11381	0.00903	0.23636	0	0.11951	0.02001
d__Bacteria|p__Firmicutes|c__Clostridia|o__Lachnospirales|f__Lachnospiraceae|g__Ruminococcus]_gnavus_group	0	0.0772	0	0	0	0.07378	0.06589	0	0	0.08982	0	0.01286
d__Bacteria|p__Firmicutes|c__Clostridia|o__Lachnospirales|f__Lachnospiraceae|g__Ruminococcus]_gnavus_group|s__Ruminococcus]_gnavus_group_unclassified	0	0.0772	0	0	0	0.07378	0.06589	0	0	0.08982	0	0.01286
d__Bacteria|p__Firmicutes|c__Clostridia|o__Lachnospirales|f__Lachnospiraceae|g__Ruminococcus]_torques_group	0	0.02476	0.0122	0	0	0	0.01048	0	0	0.02892	0.00747	0
d__Bacteria|p__Firmicutes|c__Clostridia|o__Lachnospirales|f__Lachnospiraceae|g__Ruminococcus]_torques_group|s__Ruminococcus]_torques_group_unclassified	0	0.02476	0.0122	0	0	0	0.01048	0	0	0.02892	0.00747	0
d__Bacteria|p__Firmicutes|c__Clostridia|o__Lachnospirales|f__Lachnospiraceae|g__Tuzzerella	0.00762	0.02185	0	0	0.03386	0.01691	0.03594	0.02258	0.01409	0.02131	0.07469	0.01572
d__Bacteria|p__Firmicutes|c__Clostridia|o__Lachnospirales|f__Lachnospiraceae|g__Tuzzerella|s__Tuzzerella_unclassified	0.00762	0.02185	0	0	0.03386	0.01691	0.03594	0.02258	0.01409	0.02131	0.07469	0.01572
d__Bacteria|p__Firmicutes|c__Clostridia|o__Lachnospirales|f__Lachnospiraceae|g__Tyzzerella	0.04268	0.00583	0	0	0.19547	0	0	0	0	0	0.04332	0.01
d__Bacteria|p__Firmicutes|c__Clostridia|o__Lachnospirales|f__Lachnospiraceae|g__Tyzzerella|s__Tyzzerella_unclassified	0.04268	0.00583	0	0	0.19547	0	0	0	0	0	0.04332	0.01
d__Bacteria|p__Firmicutes|c__Clostridia|o__Monoglobales	0.06402	0.09176	0.12501	0.09837	0.05849	0.04304	0.26955	0.07376	0.02348	0.07003	0.42425	0.40014
d__Bacteria|p__Firmicutes|c__Clostridia|o__Monoglobales|f__Monoglobaceae	0.06402	0.09176	0.12501	0.09837	0.05849	0.04304	0.26955	0.07376	0.02348	0.07003	0.42425	0.40014
d__Bacteria|p__Firmicutes|c__Clostridia|o__Monoglobales|f__Monoglobaceae|g__Monoglobus	0.06402	0.09176	0.12501	0.09837	0.05849	0.04304	0.26955	0.07376	0.02348	0.07003	0.42425	0.40014
d__Bacteria|p__Firmicutes|c__Clostridia|o__Monoglobales|f__Monoglobaceae|g__Monoglobus|s__Monoglobus_unclassified	0.06402	0.09176	0.12501	0.09837	0.05849	0.04304	0.26955	0.07376	0.02348	0.07003	0.42425	0.40014
d__Bacteria|p__Firmicutes|c__Clostridia|o__Oscillospirales	2.90832	2.44407	3.19526	1.44904	5.77034	2.25942	5.28765	1.93436	3.08831	2.12213	11.3203	2.91819
d__Bacteria|p__Firmicutes|c__Clostridia|o__Oscillospirales|f__Butyricicoccaceae	0.08841	0.01457	0.01677	0.17801	0.13391	0.03843	0.04791	0.03161	0.1941	0.0137	0.31072	0.03859
d__Bacteria|p__Firmicutes|c__Clostridia|o__Oscillospirales|f__Butyricicoccaceae|g__Butyricicoccus	0.07317	0.00874	0.0122	0.17801	0.08927	0.02306	0.04492	0.03161	0.1941	0.0137	0.24499	0.03859
d__Bacteria|p__Firmicutes|c__Clostridia|o__Oscillospirales|f__Butyricicoccaceae|g__Butyricicoccus|s__Butyricicoccus_unclassified	0.07317	0.00874	0.0122	0.17801	0.08927	0.02306	0.04492	0.03161	0.1941	0.0137	0.24499	0.03859
d__Bacteria|p__Firmicutes|c__Clostridia|o__Oscillospirales|f__Butyricicoccaceae|g__UCG-009	0.01524	0.00583	0.00457	0	0.04464	0.01537	0.00299	0	0	0	0.06573	0
d__Bacteria|p__Firmicutes|c__Clostridia|o__Oscillospirales|f__Butyricicoccaceae|g__UCG-009|s__UCG-009_unclassified	0.01524	0.00583	0.00457	0	0.04464	0.01537	0.00299	0	0	0	0.06573	0
d__Bacteria|p__Firmicutes|c__Clostridia|o__Oscillospirales|f__Clostridium]_methylpentosum_group	0	0	0.0061	0	0	0	0	0	0	0	0	0
d__Bacteria|p__Firmicutes|c__Clostridia|o__Oscillospirales|f__Clostridium]_methylpentosum_group|g__Clostridium]_methylpentosum_group_unclassified	0	0	0.0061	0	0	0	0	0	0	0	0	0
d__Bacteria|p__Firmicutes|c__Clostridia|o__Oscillospirales|f__Clostridium]_methylpentosum_group|g__Clostridium]_methylpentosum_group_unclassified|s__Clostridium]_methylpentosum_group_unclassified	0	0	0.0061	0	0	0	0	0	0	0	0	0
d__Bacteria|p__Firmicutes|c__Clostridia|o__Oscillospirales|f__Eubacterium]_coprostanoligenes_group	0.05183	0.05972	0.56405	0.11399	0.03232	0.25361	0.13028	0.02409	0.16122	0.07459	0.43321	1.49053
d__Bacteria|p__Firmicutes|c__Clostridia|o__Oscillospirales|f__Eubacterium]_coprostanoligenes_group|g__Eubacterium]_coprostanoligenes_group_unclassified	0.05183	0.05972	0.56405	0.11399	0.03232	0.25361	0.13028	0.02409	0.16122	0.07459	0.43321	1.49053
d__Bacteria|p__Firmicutes|c__Clostridia|o__Oscillospirales|f__Eubacterium]_coprostanoligenes_group|g__Eubacterium]_coprostanoligenes_group_unclassified|s__Eubacterium]_coprostanoligenes_group_unclassified	0.05183	0.05972	0.56405	0.11399	0.03232	0.25361	0.13028	0.02409	0.16122	0.07459	0.43321	1.49053
d__Bacteria|p__Firmicutes|c__Clostridia|o__Oscillospirales|f__Oscillospiraceae	1.75749	1.74638	0.69211	0.43409	4.44358	1.12509	3.24208	0.80385	1.34145	1.27114	8.85095	0.57164
d__Bacteria|p__Firmicutes|c__Clostridia|o__Oscillospirales|f__Oscillospiraceae|g__Colidextribacter	0.18596	0.20683	0.19361	0.14522	0.36632	0.42268	0.31298	0.23634	0.37254	0.45061	0.83804	0.13148
d__Bacteria|p__Firmicutes|c__Clostridia|o__Oscillospirales|f__Oscillospiraceae|g__Colidextribacter|s__Colidextribacter_unclassified	0.18596	0.20683	0.19361	0.14522	0.36632	0.42268	0.31298	0.23634	0.37254	0.45061	0.83804	0.13148
d__Bacteria|p__Firmicutes|c__Clostridia|o__Oscillospirales|f__Oscillospiraceae|g__Flavonifractor	0	0	0	0	0	0.00922	0	0	0	0	0	0
d__Bacteria|p__Firmicutes|c__Clostridia|o__Oscillospirales|f__Oscillospiraceae|g__Flavonifractor|s__Flavonifractor_unclassified	0	0	0	0	0	0.00922	0	0	0	0	0	0
d__Bacteria|p__Firmicutes|c__Clostridia|o__Oscillospirales|f__Oscillospiraceae|g__Intestinimonas	0.58075	0.09759	0.10214	0.14053	1.99477	0.25053	1.73111	0.12795	0.32558	0.18877	4.33659	0.22294
d__Bacteria|p__Firmicutes|c__Clostridia|o__Oscillospirales|f__Oscillospiraceae|g__Intestinimonas|s__Intestinimonas_unclassified	0.58075	0.09759	0.10214	0.14053	1.99477	0.25053	1.73111	0.12795	0.32558	0.18877	4.33659	0.22294
d__Bacteria|p__Firmicutes|c__Clostridia|o__Oscillospirales|f__Oscillospiraceae|g__NK4A214_group	0.01067	0.00291	0	0	0	0	0	0	0	0	0	0
d__Bacteria|p__Firmicutes|c__Clostridia|o__Oscillospirales|f__Oscillospiraceae|g__NK4A214_group|s__NK4A214_group_unclassified	0.01067	0.00291	0	0	0	0	0	0	0	0	0	0
d__Bacteria|p__Firmicutes|c__Clostridia|o__Oscillospirales|f__Oscillospiraceae|g__Oscillibacter	0.28047	0.34083	0.09909	0.06246	0.38787	0.29203	0.33394	0.09935	0.32871	0.15071	0.6543	0.09003
d__Bacteria|p__Firmicutes|c__Clostridia|o__Oscillospirales|f__Oscillospiraceae|g__Oscillibacter|s__Oscillibacter_unclassified	0.28047	0.34083	0.09909	0.06246	0.38787	0.29203	0.33394	0.09935	0.32871	0.15071	0.6543	0.09003
d__Bacteria|p__Firmicutes|c__Clostridia|o__Oscillospirales|f__Oscillospiraceae|g__Oscillospira	0	0.00728	0	0	0	0	0.00898	0	0	0.00913	0	0
d__Bacteria|p__Firmicutes|c__Clostridia|o__Oscillospirales|f__Oscillospiraceae|g__Oscillospiraceae_unclassified	0.67373	1.06473	0.26373	0.05621	1.66384	0.07378	0.80865	0.31913	0.28958	0.46126	3.00111	0.12719
d__Bacteria|p__Firmicutes|c__Clostridia|o__Oscillospirales|f__Oscillospiraceae|g__Oscillospiraceae_unclassified|s__Oscillospiraceae_unclassified	0.67373	1.06473	0.26373	0.05621	1.66384	0.07378	0.80865	0.31913	0.28958	0.46126	3.00111	0.12719
d__Bacteria|p__Firmicutes|c__Clostridia|o__Oscillospirales|f__Oscillospiraceae|g__Oscillospira|s__Oscillospira_unclassified	0	0.00728	0	0	0	0	0.00898	0	0	0.00913	0	0
d__Bacteria|p__Firmicutes|c__Clostridia|o__Oscillospirales|f__Oscillospiraceae|g__UCG-002	0	0	0.00305	0	0	0	0	0.00753	0	0	0	0
d__Bacteria|p__Firmicutes|c__Clostridia|o__Oscillospirales|f__Oscillospiraceae|g__UCG-002|s__UCG-002_unclassified	0	0	0.00305	0	0	0	0	0.00753	0	0	0	0
d__Bacteria|p__Firmicutes|c__Clostridia|o__Oscillospirales|f__Oscillospiraceae|g__UCG-003	0	0.00728	0.01829	0	0	0	0	0	0.02504	0	0	0
d__Bacteria|p__Firmicutes|c__Clostridia|o__Oscillospirales|f__Oscillospiraceae|g__UCG-003|s__UCG-003_unclassified	0	0.00728	0.01829	0	0	0	0	0	0.02504	0	0	0
d__Bacteria|p__Firmicutes|c__Clostridia|o__Oscillospirales|f__Oscillospiraceae|g__UCG-005	0.02591	0.01893	0.0122	0.02967	0.03078	0.07685	0.04642	0.01355	0	0.01066	0.02091	0
d__Bacteria|p__Firmicutes|c__Clostridia|o__Oscillospirales|f__Oscillospiraceae|g__UCG-005|s__UCG-005_unclassified	0.02591	0.01893	0.0122	0.02967	0.03078	0.07685	0.04642	0.01355	0	0.01066	0.02091	0
d__Bacteria|p__Firmicutes|c__Clostridia|o__Oscillospirales|f__Oscillospirales_unclassified	0	0	0.00305	0	0	0	0.00449	0.00452	0	0	0	0
d__Bacteria|p__Firmicutes|c__Clostridia|o__Oscillospirales|f__Oscillospirales_unclassified|g__Oscillospirales_unclassified	0	0	0.00305	0	0	0	0.00449	0.00452	0	0	0	0
d__Bacteria|p__Firmicutes|c__Clostridia|o__Oscillospirales|f__Oscillospirales_unclassified|g__Oscillospirales_unclassified|s__Oscillospirales_unclassified	0	0	0.00305	0	0	0	0.00449	0.00452	0	0	0	0
d__Bacteria|p__Firmicutes|c__Clostridia|o__Oscillospirales|f__Ruminococcaceae	0.95267	0.5899	1.73329	0.70734	1.11128	0.71625	1.77154	0.93632	1.30858	0.55566	1.62828	0.48731
d__Bacteria|p__Firmicutes|c__Clostridia|o__Oscillospirales|f__Ruminococcaceae|g__Anaerofilum	0	0	0	0	0	0	0.00599	0	0	0	0	0
d__Bacteria|p__Firmicutes|c__Clostridia|o__Oscillospirales|f__Ruminococcaceae|g__Anaerofilum|s__Anaerofilum_unclassified	0	0	0	0	0	0	0.00599	0	0	0	0	0
d__Bacteria|p__Firmicutes|c__Clostridia|o__Oscillospirales|f__Ruminococcaceae|g__Anaerotruncus	0.40088	0.11361	0.29879	0.28419	0.43405	0.22594	1.10965	0.30859	0.50872	0.09895	1.12485	0.14434
d__Bacteria|p__Firmicutes|c__Clostridia|o__Oscillospirales|f__Ruminococcaceae|g__Anaerotruncus|s__Anaerotruncus_unclassified	0.40088	0.11361	0.29879	0.28419	0.43405	0.22594	1.10965	0.30859	0.50872	0.09895	1.12485	0.14434
d__Bacteria|p__Firmicutes|c__Clostridia|o__Oscillospirales|f__Ruminococcaceae|g__Candidatus_Soleaferrea	0	0	0	0	0	0	0	0.00301	0	0	0	0
d__Bacteria|p__Firmicutes|c__Clostridia|o__Oscillospirales|f__Ruminococcaceae|g__Candidatus_Soleaferrea|s__Candidatus_Soleaferrea_unclassified	0	0	0	0	0	0	0	0.00301	0	0	0	0
d__Bacteria|p__Firmicutes|c__Clostridia|o__Oscillospirales|f__Ruminococcaceae|g__Eubacterium]_siraeum_group	0.01677	0.02185	0.29727	0.089	0.03694	0.04765	0.00599	0.00753	0.03913	0	0	0.16434
d__Bacteria|p__Firmicutes|c__Clostridia|o__Oscillospirales|f__Ruminococcaceae|g__Eubacterium]_siraeum_group|s__Eubacterium]_siraeum_group_unclassified	0.01677	0.02185	0.29727	0.089	0.03694	0.04765	0.00599	0.00753	0.03913	0	0	0.16434
d__Bacteria|p__Firmicutes|c__Clostridia|o__Oscillospirales|f__Ruminococcaceae|g__Faecalibacterium	0	0	0.02744	0.01561	0.04002	0.05841	0.01647	0.03312	0	0	0.02241	0
d__Bacteria|p__Firmicutes|c__Clostridia|o__Oscillospirales|f__Ruminococcaceae|g__Faecalibacterium|s__Faecalibacterium_unclassified	0	0	0.02744	0.01561	0.04002	0.05841	0.01647	0.03312	0	0	0.02241	0
d__Bacteria|p__Firmicutes|c__Clostridia|o__Oscillospirales|f__Ruminococcaceae|g__Fournierella	0	0	0.00457	0	0.00924	0	0	0	0	0	0	0.00572
d__Bacteria|p__Firmicutes|c__Clostridia|o__Oscillospirales|f__Ruminococcaceae|g__Fournierella|s__Fournierella_unclassified	0	0	0.00457	0	0.00924	0	0	0	0	0	0	0.00572
d__Bacteria|p__Firmicutes|c__Clostridia|o__Oscillospirales|f__Ruminococcaceae|g__Harryflintia	0.0061	0	0.03201	0.00312	0.01539	0.0292	0.02246	0.01355	0.05479	0.00457	0.01046	0
d__Bacteria|p__Firmicutes|c__Clostridia|o__Oscillospirales|f__Ruminococcaceae|g__Harryflintia|s__Harryflintia_unclassified	0.0061	0	0.03201	0.00312	0.01539	0.0292	0.02246	0.01355	0.05479	0.00457	0.01046	0
d__Bacteria|p__Firmicutes|c__Clostridia|o__Oscillospirales|f__Ruminococcaceae|g__Incertae_Sedis	0.33991	0.23742	0.343	0.08744	0.25242	0.17829	0.24409	0.15354	0.25984	0.12483	0.11652	0.09003
d__Bacteria|p__Firmicutes|c__Clostridia|o__Oscillospirales|f__Ruminococcaceae|g__Incertae_Sedis|s__Incertae_Sedis_unclassified	0.33991	0.23742	0.343	0.08744	0.25242	0.17829	0.24409	0.15354	0.25984	0.12483	0.11652	0.09003
d__Bacteria|p__Firmicutes|c__Clostridia|o__Oscillospirales|f__Ruminococcaceae|g__Negativibacillus	0.00762	0.00291	0.01372	0.00625	0.0077	0.03996	0.04792	0.04516	0.02661	0.04263	0.03585	0.01429
d__Bacteria|p__Firmicutes|c__Clostridia|o__Oscillospirales|f__Ruminococcaceae|g__Negativibacillus|s__Negativibacillus_unclassified	0.00762	0.00291	0.01372	0.00625	0.0077	0.03996	0.04792	0.04516	0.02661	0.04263	0.03585	0.01429
d__Bacteria|p__Firmicutes|c__Clostridia|o__Oscillospirales|f__Ruminococcaceae|g__Paludicola	0.00457	0.00728	0.05945	0.04997	0.01077	0.01537	0.00449	0	0	0	0	0
d__Bacteria|p__Firmicutes|c__Clostridia|o__Oscillospirales|f__Ruminococcaceae|g__Paludicola|s__Paludicola_unclassified	0.00457	0.00728	0.05945	0.04997	0.01077	0.01537	0.00449	0	0	0	0	0
d__Bacteria|p__Firmicutes|c__Clostridia|o__Oscillospirales|f__Ruminococcaceae|g__Ruminococcaceae_unclassified	0.10213	0.18061	0.12958	0.16239	0.12467	0.06917	0.27704	0.12344	0.34436	0.11722	0.2181	0.03144
d__Bacteria|p__Firmicutes|c__Clostridia|o__Oscillospirales|f__Ruminococcaceae|g__Ruminococcaceae_unclassified|s__Ruminococcaceae_unclassified	0.10213	0.18061	0.12958	0.16239	0.12467	0.06917	0.27704	0.12344	0.34436	0.11722	0.2181	0.03144
d__Bacteria|p__Firmicutes|c__Clostridia|o__Oscillospirales|f__Ruminococcaceae|g__Ruminococcus	0.05183	0.0102	0.49545	0.00312	0.14314	0.02152	0.00599	0.22128	0.04226	0.15528	0.07021	0.02858
d__Bacteria|p__Firmicutes|c__Clostridia|o__Oscillospirales|f__Ruminococcaceae|g__Ruminococcus|s__Ruminococcus_unclassified	0.05183	0.0102	0.49545	0.00312	0.14314	0.02152	0.00599	0.22128	0.04226	0.15528	0.07021	0.02858
d__Bacteria|p__Firmicutes|c__Clostridia|o__Oscillospirales|f__Ruminococcaceae|g__Subdoligranulum	0	0	0	0	0	0	0.00749	0.01656	0	0	0	0
d__Bacteria|p__Firmicutes|c__Clostridia|o__Oscillospirales|f__Ruminococcaceae|g__Subdoligranulum|s__Subdoligranulum_unclassified	0	0	0	0	0	0	0.00749	0.01656	0	0	0	0
d__Bacteria|p__Firmicutes|c__Clostridia|o__Oscillospirales|f__Ruminococcaceae|g__UBA1819	0.02286	0.01602	0.03201	0.00625	0.03694	0.03074	0.02396	0.01054	0.03287	0.01218	0.02988	0.00857
d__Bacteria|p__Firmicutes|c__Clostridia|o__Oscillospirales|f__Ruminococcaceae|g__UBA1819|s__UBA1819_unclassified	0.02286	0.01602	0.03201	0.00625	0.03694	0.03074	0.02396	0.01054	0.03287	0.01218	0.02988	0.00857
d__Bacteria|p__Firmicutes|c__Clostridia|o__Oscillospirales|f__UCG-010	0.05792	0.0335	0.17989	0.01561	0.04925	0.12604	0.09135	0.13397	0.08296	0.20704	0.0971	0.33012
d__Bacteria|p__Firmicutes|c__Clostridia|o__Oscillospirales|f__UCG-010|g__UCG-010_unclassified	0.05792	0.0335	0.17989	0.01561	0.04925	0.12604	0.09135	0.13397	0.08296	0.20704	0.0971	0.33012
d__Bacteria|p__Firmicutes|c__Clostridia|o__Oscillospirales|f__UCG-010|g__UCG-010_unclassified|s__UCG-010_unclassified	0.05792	0.0335	0.17989	0.01561	0.04925	0.12604	0.09135	0.13397	0.08296	0.20704	0.0971	0.33012
d__Bacteria|p__Firmicutes|c__Clostridia|o__Peptococcales	0.06097	0.05826	0.03964	0.02811	0.12929	0.09068	0.11231	0.19118	0.11427	0.10961	0.17478	0.07289
d__Bacteria|p__Firmicutes|c__Clostridia|o__Peptococcales|f__Peptococcaceae	0.06097	0.05826	0.03964	0.02811	0.12929	0.09068	0.11231	0.19118	0.11427	0.10961	0.17478	0.07289
d__Bacteria|p__Firmicutes|c__Clostridia|o__Peptococcales|f__Peptococcaceae|g__Peptococcaceae_unclassified	0.0564	0.05098	0.03964	0.02811	0.10466	0.09068	0.09883	0.17763	0.10331	0.10352	0.15984	0.0686
d__Bacteria|p__Firmicutes|c__Clostridia|o__Peptococcales|f__Peptococcaceae|g__Peptococcaceae_unclassified|s__Peptococcaceae_unclassified	0.0564	0.05098	0.03964	0.02811	0.10466	0.09068	0.09883	0.17763	0.10331	0.10352	0.15984	0.0686
d__Bacteria|p__Firmicutes|c__Clostridia|o__Peptococcales|f__Peptococcaceae|g__Peptococcus	0.00457	0.00728	0	0	0.02463	0	0.01348	0.01355	0.01096	0.00609	0.01494	0.00429
d__Bacteria|p__Firmicutes|c__Clostridia|o__Peptococcales|f__Peptococcaceae|g__Peptococcus|s__Peptococcus_unclassified	0.00457	0.00728	0	0	0.02463	0	0.01348	0.01355	0.01096	0.00609	0.01494	0.00429
d__Bacteria|p__Firmicutes|c__Clostridia|o__Peptostreptococcales-Tissierellales	0.06859	0.04807	0.21038	0.0203	0.13544	0.16753	0.55107	0.12795	0.14087	0.11875	0.17775	0.29152
d__Bacteria|p__Firmicutes|c__Clostridia|o__Peptostreptococcales-Tissierellales|f__Anaerovoracaceae	0.05639	0.02622	0.21038	0.0203	0.11697	0.1537	0.13926	0.11892	0.12522	0.10657	0.11501	0.26437
d__Bacteria|p__Firmicutes|c__Clostridia|o__Peptostreptococcales-Tissierellales|f__Anaerovoracaceae|g__Anaerovorax	0	0	0.0061	0	0	0	0	0	0	0	0.00896	0
d__Bacteria|p__Firmicutes|c__Clostridia|o__Peptostreptococcales-Tissierellales|f__Anaerovoracaceae|g__Anaerovorax|s__Anaerovorax_unclassified	0	0	0.0061	0	0	0	0	0	0	0	0.00896	0
d__Bacteria|p__Firmicutes|c__Clostridia|o__Peptostreptococcales-Tissierellales|f__Anaerovoracaceae|g__Eubacterium]_brachy_group	0.01829	0.00874	0.02744	0.0203	0.06157	0.01383	0.07038	0.03011	0.05635	0.03197	0.00896	0.01858
d__Bacteria|p__Firmicutes|c__Clostridia|o__Peptostreptococcales-Tissierellales|f__Anaerovoracaceae|g__Eubacterium]_brachy_group|s__Eubacterium]_brachy_group_unclassified	0.01829	0.00874	0.02744	0.0203	0.06157	0.01383	0.07038	0.03011	0.05635	0.03197	0.00896	0.01858
d__Bacteria|p__Firmicutes|c__Clostridia|o__Peptostreptococcales-Tissierellales|f__Anaerovoracaceae|g__Eubacterium]_nodatum_group	0.01829	0.00437	0.12653	0	0.01231	0.03843	0.05241	0.06021	0.04539	0.05024	0.05228	0.18149
d__Bacteria|p__Firmicutes|c__Clostridia|o__Peptostreptococcales-Tissierellales|f__Anaerovoracaceae|g__Eubacterium]_nodatum_group|s__Eubacterium]_nodatum_group_unclassified	0.01829	0.00437	0.12653	0	0.01231	0.03843	0.05241	0.06021	0.04539	0.05024	0.05228	0.18149
d__Bacteria|p__Firmicutes|c__Clostridia|o__Peptostreptococcales-Tissierellales|f__Anaerovoracaceae|g__Family_XIII_AD3011_group	0.00457	0.00437	0.03964	0	0.01077	0.07224	0.01647	0.01054	0	0.02436	0.03137	0.05573
d__Bacteria|p__Firmicutes|c__Clostridia|o__Peptostreptococcales-Tissierellales|f__Anaerovoracaceae|g__Family_XIII_AD3011_group|s__Family_XIII_AD3011_group_unclassified	0.00457	0.00437	0.03964	0	0.01077	0.07224	0.01647	0.01054	0	0.02436	0.03137	0.05573
d__Bacteria|p__Firmicutes|c__Clostridia|o__Peptostreptococcales-Tissierellales|f__Anaerovoracaceae|g__Family_XIII_UCG-001	0.01524	0.00874	0.01067	0	0.03232	0.0292	0	0.01806	0.02348	0	0.01344	0.00857
d__Bacteria|p__Firmicutes|c__Clostridia|o__Peptostreptococcales-Tissierellales|f__Anaerovoracaceae|g__Family_XIII_UCG-001|s__Family_XIII_UCG-001_unclassified	0.01524	0.00874	0.01067	0	0.03232	0.0292	0	0.01806	0.02348	0	0.01344	0.00857
d__Bacteria|p__Firmicutes|c__Clostridia|o__Peptostreptococcales-Tissierellales|f__Peptostreptococcaceae	0.0122	0.02185	0	0	0.01847	0.01383	0.41181	0.00903	0.01565	0.01218	0.06274	0.02715
d__Bacteria|p__Firmicutes|c__Clostridia|o__Peptostreptococcales-Tissierellales|f__Peptostreptococcaceae|g__Clostridioides	0	0	0	0	0	0	0	0	0	0	0	0.01143
d__Bacteria|p__Firmicutes|c__Clostridia|o__Peptostreptococcales-Tissierellales|f__Peptostreptococcaceae|g__Clostridioides|s__Clostridioides_unclassified	0	0	0	0	0	0	0	0	0	0	0	0.01143
d__Bacteria|p__Firmicutes|c__Clostridia|o__Peptostreptococcales-Tissierellales|f__Peptostreptococcaceae|g__Peptoclostridium	0	0	0	0	0.00308	0	0	0	0	0	0	0
d__Bacteria|p__Firmicutes|c__Clostridia|o__Peptostreptococcales-Tissierellales|f__Peptostreptococcaceae|g__Peptoclostridium|s__Peptoclostridium_unclassified	0	0	0	0	0.00308	0	0	0	0	0	0	0
d__Bacteria|p__Firmicutes|c__Clostridia|o__Peptostreptococcales-Tissierellales|f__Peptostreptococcaceae|g__Peptostreptococcus	0.00305	0	0	0	0.00308	0	0.01497	0	0	0	0	0.00429
d__Bacteria|p__Firmicutes|c__Clostridia|o__Peptostreptococcales-Tissierellales|f__Peptostreptococcaceae|g__Peptostreptococcus|s__Peptostreptococcus_unclassified	0.00305	0	0	0	0.00308	0	0.01497	0	0	0	0	0.00429
d__Bacteria|p__Firmicutes|c__Clostridia|o__Peptostreptococcales-Tissierellales|f__Peptostreptococcaceae|g__Romboutsia	0.00915	0.02185	0	0	0.01231	0	0.39684	0.00903	0.01565	0.01218	0.06274	0.01143
d__Bacteria|p__Firmicutes|c__Clostridia|o__Peptostreptococcales-Tissierellales|f__Peptostreptococcaceae|g__Romboutsia|s__Romboutsia_unclassified	0.00915	0.02185	0	0	0.01231	0	0.39684	0.00903	0.01565	0.01218	0.06274	0.01143
d__Bacteria|p__Firmicutes|c__Clostridia|o__Peptostreptococcales-Tissierellales|f__Peptostreptococcaceae|g__Terrisporobacter	0	0	0	0	0	0.01383	0	0	0	0	0	0
d__Bacteria|p__Firmicutes|c__Clostridia|o__Peptostreptococcales-Tissierellales|f__Peptostreptococcaceae|g__Terrisporobacter|s__Terrisporobacter_unclassified	0	0	0	0	0	0.01383	0	0	0	0	0	0
d__Bacteria|p__Firmicutes|c__Erysipelotrichia	0.07012	0.16896	0.11129	0.06558	0.10159	0.17061	0.24559	0.10086	0.10487	0.07307	0.15237	0.09003
d__Bacteria|p__Firmicutes|c__Erysipelotrichia|o__Erysipelotrichales	0.07012	0.16896	0.11129	0.06558	0.10159	0.17061	0.24559	0.10086	0.10487	0.07307	0.15237	0.09003
d__Bacteria|p__Firmicutes|c__Erysipelotrichia|o__Erysipelotrichales|f__Erysipelotrichaceae	0.07012	0.16896	0.11129	0.06558	0.10159	0.17061	0.24559	0.10086	0.10487	0.07307	0.15237	0.09003
d__Bacteria|p__Firmicutes|c__Erysipelotrichia|o__Erysipelotrichales|f__Erysipelotrichaceae|g__Absiella	0.07012	0.16896	0.11129	0.06558	0.09543	0.17061	0.24559	0.10086	0.10487	0.07307	0.15237	0.09003
d__Bacteria|p__Firmicutes|c__Erysipelotrichia|o__Erysipelotrichales|f__Erysipelotrichaceae|g__Absiella|s__Absiella_sp.	0.07012	0.16896	0.11129	0.06558	0.09543	0.17061	0.24559	0.10086	0.10487	0.07307	0.15237	0.09003
d__Bacteria|p__Firmicutes|c__Erysipelotrichia|o__Erysipelotrichales|f__Erysipelotrichaceae|g__Erysipelatoclostridium	0	0	0	0	0.00616	0	0	0	0	0	0	0
d__Bacteria|p__Firmicutes|c__Erysipelotrichia|o__Erysipelotrichales|f__Erysipelotrichaceae|g__Erysipelatoclostridium|s__Erysipelatoclostridium_sp._SNUG30386	0	0	0	0	0.00616	0	0	0	0	0	0	0
d__Bacteria|p__Firmicutes|c__Firmicutes_unclassified	0.34296	0.68603	0.40856	0.27638	0.63722	0.55333	0.77121	0.47568	0.69499	0.49323	1.10095	0.44587
d__Bacteria|p__Firmicutes|c__Firmicutes_unclassified|o__Firmicutes_unclassified	0.34296	0.68603	0.40856	0.27638	0.63722	0.55333	0.77121	0.47568	0.69499	0.49323	1.10095	0.44587
d__Bacteria|p__Firmicutes|c__Firmicutes_unclassified|o__Firmicutes_unclassified|f__Firmicutes_unclassified	0.34296	0.68603	0.40856	0.27638	0.63722	0.55333	0.77121	0.47568	0.69499	0.49323	1.10095	0.44587
d__Bacteria|p__Firmicutes|c__Firmicutes_unclassified|o__Firmicutes_unclassified|f__Firmicutes_unclassified|g__Firmicutes_unclassified	0.34296	0.68603	0.40856	0.27638	0.63722	0.55333	0.77121	0.47568	0.69499	0.49323	1.10095	0.44587
d__Bacteria|p__Firmicutes|c__Firmicutes_unclassified|o__Firmicutes_unclassified|f__Firmicutes_unclassified|g__Firmicutes_unclassified|s__Firmicutes_unclassified	0.34296	0.68603	0.40856	0.27638	0.63722	0.55333	0.77121	0.47568	0.69499	0.49323	1.10095	0.44587
d__Bacteria|p__Firmicutes|c__Negativicutes	0.19511	0.24907	0.218	0.27794	0.43097	0.28896	0.53011	0.29655	0.16279	0.1979	0.32415	0.24723
d__Bacteria|p__Firmicutes|c__Negativicutes|o__Acidaminococcales	0.00457	0.01602	0	0	0.00462	0.00461	0.00898	0	0.01565	0.0137	0.00896	0.00857
d__Bacteria|p__Firmicutes|c__Negativicutes|o__Acidaminococcales|f__Acidaminococcaceae	0.00457	0.01602	0	0	0.00462	0.00461	0.00898	0	0.01565	0.0137	0.00896	0.00857
d__Bacteria|p__Firmicutes|c__Negativicutes|o__Acidaminococcales|f__Acidaminococcaceae|g__Phascolarctobacterium	0.00457	0.01602	0	0	0.00462	0.00461	0.00898	0	0.01565	0.0137	0.00896	0.00857
d__Bacteria|p__Firmicutes|c__Negativicutes|o__Acidaminococcales|f__Acidaminococcaceae|g__Phascolarctobacterium|s__Phascolarctobacterium_faecium	0	0.01165	0	0	0	0	0	0	0	0.00913	0	0
d__Bacteria|p__Firmicutes|c__Negativicutes|o__Acidaminococcales|f__Acidaminococcaceae|g__Phascolarctobacterium|s__Phascolarctobacterium_sp.	0	0	0	0	0	0.00461	0.00898	0	0.01565	0	0	0.00857
d__Bacteria|p__Firmicutes|c__Negativicutes|o__Acidaminococcales|f__Acidaminococcaceae|g__Phascolarctobacterium|s__Phascolarctobacterium_succinatutens	0	0	0	0	0.00462	0	0	0	0	0	0.00896	0
d__Bacteria|p__Firmicutes|c__Negativicutes|o__Acidaminococcales|f__Acidaminococcaceae|g__Phascolarctobacterium|s__Phascolarctobacterium_unclassified	0.00457	0.00437	0	0	0	0	0	0	0	0.00457	0	0
d__Bacteria|p__Firmicutes|c__Negativicutes|o__Veillonellales-Selenomonadales	0.19054	0.23305	0.218	0.27794	0.42635	0.28435	0.52113	0.29655	0.14714	0.1842	0.31519	0.23866
d__Bacteria|p__Firmicutes|c__Negativicutes|o__Veillonellales-Selenomonadales|f__Selenomonadaceae	0	0.03059	0.01372	0.01874	0.00616	0.01998	0.04942	0	0	0.02892	0.09859	0.01429
d__Bacteria|p__Firmicutes|c__Negativicutes|o__Veillonellales-Selenomonadales|f__Selenomonadaceae|g__Megamonas	0	0.03059	0.01372	0.01874	0.00616	0	0.04942	0	0	0.02892	0.00896	0.01429
d__Bacteria|p__Firmicutes|c__Negativicutes|o__Veillonellales-Selenomonadales|f__Selenomonadaceae|g__Megamonas|s__Megamonas_unclassified	0	0.03059	0.01372	0.01874	0.00616	0	0.04942	0	0	0.02892	0.00896	0.01429
d__Bacteria|p__Firmicutes|c__Negativicutes|o__Veillonellales-Selenomonadales|f__Selenomonadaceae|g__Quinella	0	0	0	0	0	0.01998	0	0	0	0	0.08963	0
d__Bacteria|p__Firmicutes|c__Negativicutes|o__Veillonellales-Selenomonadales|f__Selenomonadaceae|g__Quinella|s__Quinella_unclassified	0	0	0	0	0	0.01998	0	0	0	0	0.08963	0
d__Bacteria|p__Firmicutes|c__Negativicutes|o__Veillonellales-Selenomonadales|f__Veillonellaceae	0.19054	0.20246	0.20428	0.2592	0.42019	0.26437	0.47171	0.29655	0.14714	0.15528	0.2166	0.22437
d__Bacteria|p__Firmicutes|c__Negativicutes|o__Veillonellales-Selenomonadales|f__Veillonellaceae|g__Dialister	0.0061	0	0	0	0	0	0.01198	0	0.00313	0	0	0
d__Bacteria|p__Firmicutes|c__Negativicutes|o__Veillonellales-Selenomonadales|f__Veillonellaceae|g__Dialister|s__Dialister_unclassified	0.0061	0	0	0	0	0	0.01198	0	0.00313	0	0	0
d__Bacteria|p__Firmicutes|c__Negativicutes|o__Veillonellales-Selenomonadales|f__Veillonellaceae|g__Megasphaera	0.02439	0	0	0	0	0	0	0.02409	0.02818	0	0.00896	0
d__Bacteria|p__Firmicutes|c__Negativicutes|o__Veillonellales-Selenomonadales|f__Veillonellaceae|g__Megasphaera|s__Megasphaera_unclassified	0.02439	0	0	0	0	0	0	0.02409	0.02818	0	0.00896	0
d__Bacteria|p__Firmicutes|c__Negativicutes|o__Veillonellales-Selenomonadales|f__Veillonellaceae|g__Veillonella	0.16005	0.20246	0.19513	0.2592	0.42019	0.26437	0.45973	0.27246	0.11583	0.15528	0.20764	0.22437
d__Bacteria|p__Firmicutes|c__Negativicutes|o__Veillonellales-Selenomonadales|f__Veillonellaceae|g__Veillonellaceae_unclassified	0	0	0.00915	0	0	0	0	0	0	0	0	0
d__Bacteria|p__Firmicutes|c__Negativicutes|o__Veillonellales-Selenomonadales|f__Veillonellaceae|g__Veillonellaceae_unclassified|s__Veillonellaceae_unclassified	0	0	0.00915	0	0	0	0	0	0	0	0	0
d__Bacteria|p__Firmicutes|c__Negativicutes|o__Veillonellales-Selenomonadales|f__Veillonellaceae|g__Veillonella|s__Veillonella_unclassified	0.16005	0.20246	0.19513	0.2592	0.42019	0.26437	0.45973	0.27246	0.11583	0.15528	0.20764	0.22437
d__Bacteria|p__Fusobacteriota	0.09298	0.08739	0.11281	0.089	0.07696	0.10759	0.09584	0.08731	0.07983	0.08068	0.11502	0.08574
d__Bacteria|p__Fusobacteriota|c__Fusobacteriia	0.09298	0.08739	0.11281	0.089	0.07696	0.10759	0.09584	0.08731	0.07983	0.08068	0.11502	0.08574
d__Bacteria|p__Fusobacteriota|c__Fusobacteriia|o__Fusobacteriales	0.09298	0.08739	0.11281	0.089	0.07696	0.10759	0.09584	0.08731	0.07983	0.08068	0.11502	0.08574
d__Bacteria|p__Fusobacteriota|c__Fusobacteriia|o__Fusobacteriales|f__Fusobacteriaceae	0.09298	0.08739	0.11281	0.089	0.07696	0.10759	0.09584	0.08731	0.07983	0.08068	0.11502	0.08574
d__Bacteria|p__Fusobacteriota|c__Fusobacteriia|o__Fusobacteriales|f__Fusobacteriaceae|g__Cetobacterium	0	0	0.01677	0	0	0	0	0	0	0	0.01344	0
d__Bacteria|p__Fusobacteriota|c__Fusobacteriia|o__Fusobacteriales|f__Fusobacteriaceae|g__Cetobacterium|s__Cetobacterium_unclassified	0	0	0.01677	0	0	0	0	0	0	0	0.01344	0
d__Bacteria|p__Fusobacteriota|c__Fusobacteriia|o__Fusobacteriales|f__Fusobacteriaceae|g__Fusobacterium	0.09298	0.08739	0.09604	0.089	0.07696	0.10759	0.09584	0.08731	0.07983	0.08068	0.10158	0.08574
d__Bacteria|p__Fusobacteriota|c__Fusobacteriia|o__Fusobacteriales|f__Fusobacteriaceae|g__Fusobacterium|s__Fusobacterium_unclassified	0.09298	0.08739	0.09604	0.089	0.07696	0.10759	0.09584	0.08731	0.07983	0.08068	0.10158	0.08574
d__Bacteria|p__MBNT15	0	0	0	0	0	0	0	0	0	0	0	0.00286
d__Bacteria|p__MBNT15|c__MBNT15_unclassified	0	0	0	0	0	0	0	0	0	0	0	0.00286
d__Bacteria|p__MBNT15|c__MBNT15_unclassified|o__MBNT15_unclassified	0	0	0	0	0	0	0	0	0	0	0	0.00286
d__Bacteria|p__MBNT15|c__MBNT15_unclassified|o__MBNT15_unclassified|f__MBNT15_unclassified	0	0	0	0	0	0	0	0	0	0	0	0.00286
d__Bacteria|p__MBNT15|c__MBNT15_unclassified|o__MBNT15_unclassified|f__MBNT15_unclassified|g__MBNT15_unclassified	0	0	0	0	0	0	0	0	0	0	0	0.00286
d__Bacteria|p__MBNT15|c__MBNT15_unclassified|o__MBNT15_unclassified|f__MBNT15_unclassified|g__MBNT15_unclassified|s__MBNT15_unclassified	0	0	0	0	0	0	0	0	0	0	0	0.00286
d__Bacteria|p__Patescibacteria	0.53807	1.42741	1.16316	6.14597	1.24673	0.19213	1.38219	0.71202	0.41637	1.29093	0.70359	2.90389
d__Bacteria|p__Patescibacteria|c__Saccharimonadia	0.53807	1.42741	1.16316	6.14597	1.24673	0.19213	1.38219	0.71202	0.41637	1.29093	0.70359	2.90389
d__Bacteria|p__Patescibacteria|c__Saccharimonadia|o__Saccharimonadales	0.53807	1.42741	1.16316	6.14597	1.24673	0.19213	1.38219	0.71202	0.41637	1.29093	0.70359	2.90389
d__Bacteria|p__Patescibacteria|c__Saccharimonadia|o__Saccharimonadales|f__Saccharimonadaceae	0.53807	1.42741	1.16316	6.14597	1.24673	0.19213	1.38219	0.71202	0.41637	1.29093	0.70359	2.90389
d__Bacteria|p__Patescibacteria|c__Saccharimonadia|o__Saccharimonadales|f__Saccharimonadaceae|g__Candidatus_Saccharimonas	0.53807	1.42741	1.16316	6.14597	1.24673	0.19213	1.38219	0.71202	0.41637	1.29093	0.70359	2.90389
d__Bacteria|p__Patescibacteria|c__Saccharimonadia|o__Saccharimonadales|f__Saccharimonadaceae|g__Candidatus_Saccharimonas|s__Candidatus_Saccharimonas_unclassified	0.53807	1.42741	1.16316	6.14597	1.24673	0.19213	1.38219	0.71202	0.41637	1.29093	0.70359	2.90389
d__Bacteria|p__Proteobacteria	1.72549	2.83152	1.94978	2.09395	1.62385	1.65997	1.91375	1.57456	1.6279	1.51925	1.84785	2.07071
d__Bacteria|p__Proteobacteria|c__Alphaproteobacteria	0.30029	0.25198	0.2988	0.14522	0.08005	0.12295	0.42977	0.05419	0.24419	0.22987	0.28084	0.14718
d__Bacteria|p__Proteobacteria|c__Alphaproteobacteria|o__Acetobacterales	0	0	0	0	0.00308	0	0.00299	0	0	0	0	0
d__Bacteria|p__Proteobacteria|c__Alphaproteobacteria|o__Acetobacterales|f__Acetobacteraceae	0	0	0	0	0.00308	0	0.00299	0	0	0	0	0
d__Bacteria|p__Proteobacteria|c__Alphaproteobacteria|o__Acetobacterales|f__Acetobacteraceae|g__Bombella	0	0	0	0	0.00308	0	0	0	0	0	0	0
d__Bacteria|p__Proteobacteria|c__Alphaproteobacteria|o__Acetobacterales|f__Acetobacteraceae|g__Bombella|s__Bombella_unclassified	0	0	0	0	0.00308	0	0	0	0	0	0	0
d__Bacteria|p__Proteobacteria|c__Alphaproteobacteria|o__Acetobacterales|f__Acetobacteraceae|g__Muricoccus	0	0	0	0	0	0	0.00299	0	0	0	0	0
d__Bacteria|p__Proteobacteria|c__Alphaproteobacteria|o__Acetobacterales|f__Acetobacteraceae|g__Muricoccus|s__Muricoccus_unclassified	0	0	0	0	0	0	0.00299	0	0	0	0	0
d__Bacteria|p__Proteobacteria|c__Alphaproteobacteria|o__Alphaproteobacteria_unclassified	0	0	0.00305	0	0	0	0	0	0	0	0.00299	0
d__Bacteria|p__Proteobacteria|c__Alphaproteobacteria|o__Alphaproteobacteria_unclassified|f__Alphaproteobacteria_unclassified	0	0	0.00305	0	0	0	0	0	0	0	0.00299	0
d__Bacteria|p__Proteobacteria|c__Alphaproteobacteria|o__Alphaproteobacteria_unclassified|f__Alphaproteobacteria_unclassified|g__Alphaproteobacteria_unclassified	0	0	0.00305	0	0	0	0	0	0	0	0.00299	0
d__Bacteria|p__Proteobacteria|c__Alphaproteobacteria|o__Alphaproteobacteria_unclassified|f__Alphaproteobacteria_unclassified|g__Alphaproteobacteria_unclassified|s__Alphaproteobacteria_unclassified	0	0	0.00305	0	0	0	0	0	0	0	0.00299	0
d__Bacteria|p__Proteobacteria|c__Alphaproteobacteria|o__Caulobacterales	0.1509	0.16459	0.19361	0.08432	0.06465	0.05072	0.22013	0.04064	0.13305	0.16593	0.21511	0.10289
d__Bacteria|p__Proteobacteria|c__Alphaproteobacteria|o__Caulobacterales|f__Caulobacteraceae	0.1509	0.16459	0.19361	0.08432	0.06465	0.05072	0.22013	0.04064	0.13305	0.16593	0.21511	0.10289
d__Bacteria|p__Proteobacteria|c__Alphaproteobacteria|o__Caulobacterales|f__Caulobacteraceae|g__Brevundimonas	0.1509	0.16168	0.19361	0.08432	0.06465	0.05072	0.22013	0.04064	0.13305	0.16593	0.21511	0.10289
d__Bacteria|p__Proteobacteria|c__Alphaproteobacteria|o__Caulobacterales|f__Caulobacteraceae|g__Brevundimonas|s__Brevundimonas_sp._MC8-1	0	0	0	0	0	0	0.03145	0	0	0	0	0
d__Bacteria|p__Proteobacteria|c__Alphaproteobacteria|o__Caulobacterales|f__Caulobacteraceae|g__Brevundimonas|s__Brevundimonas_sp._N4_98_6	0	0	0	0	0	0	0	0	0	0.00761	0	0
d__Bacteria|p__Proteobacteria|c__Alphaproteobacteria|o__Caulobacterales|f__Caulobacteraceae|g__Brevundimonas|s__Brevundimonas_sp._NA61	0.1509	0.16168	0.19361	0.08432	0.06465	0.05072	0.18868	0.04064	0.13305	0.15832	0.21511	0.10289
d__Bacteria|p__Proteobacteria|c__Alphaproteobacteria|o__Caulobacterales|f__Caulobacteraceae|g__Caulobacter	0	0.00291	0	0	0	0	0	0	0	0	0	0
d__Bacteria|p__Proteobacteria|c__Alphaproteobacteria|o__Caulobacterales|f__Caulobacteraceae|g__Caulobacter|s__Caulobacter_sp._NW-2013-Rh15	0	0.00291	0	0	0	0	0	0	0	0	0	0
d__Bacteria|p__Proteobacteria|c__Alphaproteobacteria|o__Reyranellales	0	0	0	0	0	0	0	0	0	0	0	0
d__Bacteria|p__Proteobacteria|c__Alphaproteobacteria|o__Reyranellales|f__Reyranellaceae	0	0	0	0	0	0	0	0	0	0	0	0
d__Bacteria|p__Proteobacteria|c__Alphaproteobacteria|o__Reyranellales|f__Reyranellaceae|g__Reyranella	0	0	0	0	0	0	0	0	0	0	0	0
d__Bacteria|p__Proteobacteria|c__Alphaproteobacteria|o__Reyranellales|f__Reyranellaceae|g__Reyranella|s__Reyranella_unclassified	0	0	0	0	0	0	0	0	0	0	0	0
d__Bacteria|p__Proteobacteria|c__Alphaproteobacteria|o__Rhizobiales	0.00915	0	0	0.00312	0.00616	0	0.00898	0	0	0	0	0
d__Bacteria|p__Proteobacteria|c__Alphaproteobacteria|o__Rhizobiales|f__Beijerinckiaceae	0	0	0	0	0	0	0.00898	0	0	0	0	0
d__Bacteria|p__Proteobacteria|c__Alphaproteobacteria|o__Rhizobiales|f__Beijerinckiaceae|g__Bosea	0	0	0	0	0	0	0.00898	0	0	0	0	0
d__Bacteria|p__Proteobacteria|c__Alphaproteobacteria|o__Rhizobiales|f__Beijerinckiaceae|g__Bosea|s__Bosea_unclassified	0	0	0	0	0	0	0.00898	0	0	0	0	0
d__Bacteria|p__Proteobacteria|c__Alphaproteobacteria|o__Rhizobiales|f__Beijerinckiaceae|g__Methylobacterium-Methylorubrum	0	0	0	0	0	0	0	0	0	0	0	0
d__Bacteria|p__Proteobacteria|c__Alphaproteobacteria|o__Rhizobiales|f__Beijerinckiaceae|g__Methylobacterium-Methylorubrum|s__Methylobacterium-Methylorubrum_unclassified	0	0	0	0	0	0	0	0	0	0	0	0
d__Bacteria|p__Proteobacteria|c__Alphaproteobacteria|o__Rhizobiales|f__Hyphomicrobiaceae	0	0	0	0	0	0	0	0	0	0	0	0
d__Bacteria|p__Proteobacteria|c__Alphaproteobacteria|o__Rhizobiales|f__Hyphomicrobiaceae|g__Devosia	0	0	0	0	0	0	0	0	0	0	0	0
d__Bacteria|p__Proteobacteria|c__Alphaproteobacteria|o__Rhizobiales|f__Hyphomicrobiaceae|g__Devosia|s__uncultured_Devosia_sp.	0	0	0	0	0	0	0	0	0	0	0	0
d__Bacteria|p__Proteobacteria|c__Alphaproteobacteria|o__Rhizobiales|f__Hyphomicrobiaceae|g__Hyphomicrobium	0	0	0	0	0	0	0	0	0	0	0	0
d__Bacteria|p__Proteobacteria|c__Alphaproteobacteria|o__Rhizobiales|f__Hyphomicrobiaceae|g__Hyphomicrobium|s__Hyphomicrobium_sp._2NES1	0	0	0	0	0	0	0	0	0	0	0	0
d__Bacteria|p__Proteobacteria|c__Alphaproteobacteria|o__Rhizobiales|f__Phyllobacteriaceae	0	0	0	0	0	0	0	0	0	0	0	0
d__Bacteria|p__Proteobacteria|c__Alphaproteobacteria|o__Rhizobiales|f__Phyllobacteriaceae|g__Mesorhizobium	0	0	0	0	0	0	0	0	0	0	0	0
d__Bacteria|p__Proteobacteria|c__Alphaproteobacteria|o__Rhizobiales|f__Phyllobacteriaceae|g__Mesorhizobium|s__Mesorhizobium_sp._PETBA10	0	0	0	0	0	0	0	0	0	0	0	0
d__Bacteria|p__Proteobacteria|c__Alphaproteobacteria|o__Rhizobiales|f__Rhizobiaceae	0.00915	0	0	0	0.00616	0	0	0	0	0	0	0
d__Bacteria|p__Proteobacteria|c__Alphaproteobacteria|o__Rhizobiales|f__Rhizobiaceae|g__Allorhizobium-Neorhizobium-Pararhizobium-Rhizobium	0.0061	0	0	0	0	0	0	0	0	0	0	0
d__Bacteria|p__Proteobacteria|c__Alphaproteobacteria|o__Rhizobiales|f__Rhizobiaceae|g__Allorhizobium-Neorhizobium-Pararhizobium-Rhizobium|s__Allorhizobium-Neorhizobium-Pararhizobium-Rhizobium_unclassified	0.0061	0	0	0	0	0	0	0	0	0	0	0
d__Bacteria|p__Proteobacteria|c__Alphaproteobacteria|o__Rhizobiales|f__Rhizobiaceae|g__Ochrobactrum	0.00305	0	0	0	0	0	0	0	0	0	0	0
d__Bacteria|p__Proteobacteria|c__Alphaproteobacteria|o__Rhizobiales|f__Rhizobiaceae|g__Ochrobactrum|s__Ochrobactrum_unclassified	0.00305	0	0	0	0	0	0	0	0	0	0	0
d__Bacteria|p__Proteobacteria|c__Alphaproteobacteria|o__Rhizobiales|f__Rhizobiaceae|g__Shinella	0	0	0	0	0	0	0	0	0	0	0	0
d__Bacteria|p__Proteobacteria|c__Alphaproteobacteria|o__Rhizobiales|f__Rhizobiaceae|g__Shinella|s__Shinella_fusca	0	0	0	0	0	0	0	0	0	0	0	0
d__Bacteria|p__Proteobacteria|c__Alphaproteobacteria|o__Rhizobiales|f__Rhizobiaceae|g__Tianweitania	0	0	0	0	0.00616	0	0	0	0	0	0	0
d__Bacteria|p__Proteobacteria|c__Alphaproteobacteria|o__Rhizobiales|f__Rhizobiaceae|g__Tianweitania|s__Tianweitania_unclassified	0	0	0	0	0.00616	0	0	0	0	0	0	0
d__Bacteria|p__Proteobacteria|c__Alphaproteobacteria|o__Rhizobiales|f__Xanthobacteraceae	0	0	0	0.00312	0	0	0	0	0	0	0	0
d__Bacteria|p__Proteobacteria|c__Alphaproteobacteria|o__Rhizobiales|f__Xanthobacteraceae|g__Pseudolabrys	0	0	0	0	0	0	0	0	0	0	0	0
d__Bacteria|p__Proteobacteria|c__Alphaproteobacteria|o__Rhizobiales|f__Xanthobacteraceae|g__Pseudolabrys|s__Pseudolabrys_unclassified	0	0	0	0	0	0	0	0	0	0	0	0
d__Bacteria|p__Proteobacteria|c__Alphaproteobacteria|o__Rhizobiales|f__Xanthobacteraceae|g__Rhodopseudomonas	0	0	0	0	0	0	0	0	0	0	0	0
d__Bacteria|p__Proteobacteria|c__Alphaproteobacteria|o__Rhizobiales|f__Xanthobacteraceae|g__Rhodopseudomonas|s__Rhodopseudomonas_unclassified	0	0	0	0	0	0	0	0	0	0	0	0
d__Bacteria|p__Proteobacteria|c__Alphaproteobacteria|o__Rhizobiales|f__Xanthobacteraceae|g__Xanthobacter	0	0	0	0.00312	0	0	0	0	0	0	0	0
d__Bacteria|p__Proteobacteria|c__Alphaproteobacteria|o__Rhizobiales|f__Xanthobacteraceae|g__Xanthobacter|s__Xanthobacter_sp._Y8	0	0	0	0.00312	0	0	0	0	0	0	0	0
d__Bacteria|p__Proteobacteria|c__Alphaproteobacteria|o__Rhodobacterales	0.10213	0.03059	0.01982	0.02811	0	0.04918	0.13777	0.01355	0.05792	0.02588	0.04034	0.02429
d__Bacteria|p__Proteobacteria|c__Alphaproteobacteria|o__Rhodobacterales|f__Rhodobacteraceae	0.10213	0.03059	0.01982	0.02811	0	0.04918	0.13777	0.01355	0.05792	0.02588	0.04034	0.02429
d__Bacteria|p__Proteobacteria|c__Alphaproteobacteria|o__Rhodobacterales|f__Rhodobacteraceae|g__Paracoccus	0.10213	0.03059	0.01982	0.02811	0	0.04918	0.13777	0.01355	0.05792	0.02588	0.04034	0.02429
d__Bacteria|p__Proteobacteria|c__Alphaproteobacteria|o__Rhodobacterales|f__Rhodobacteraceae|g__Paracoccus|s__Paracoccus_aminophilus	0.07774	0.03059	0.01982	0.02811	0	0.03996	0.08386	0	0.05792	0.02588	0.0239	0.02429
d__Bacteria|p__Proteobacteria|c__Alphaproteobacteria|o__Rhodobacterales|f__Rhodobacteraceae|g__Paracoccus|s__Paracoccus_sp._G200V	0	0	0	0	0	0.00922	0	0	0	0	0.00598	0
d__Bacteria|p__Proteobacteria|c__Alphaproteobacteria|o__Rhodobacterales|f__Rhodobacteraceae|g__Paracoccus|s__Paracoccus_sp._Lor58	0	0	0	0	0	0	0	0.01355	0	0	0	0
d__Bacteria|p__Proteobacteria|c__Alphaproteobacteria|o__Rhodobacterales|f__Rhodobacteraceae|g__Paracoccus|s__Paracoccus_sp._MBIC4036	0	0	0	0	0	0	0.02396	0	0	0	0	0
d__Bacteria|p__Proteobacteria|c__Alphaproteobacteria|o__Rhodobacterales|f__Rhodobacteraceae|g__Paracoccus|s__Paracoccus_sp._ZSGR3	0.02439	0	0	0	0	0	0.02995	0	0	0	0.01046	0
d__Bacteria|p__Proteobacteria|c__Alphaproteobacteria|o__Rhodobacterales|f__Rhodobacteraceae|g__Rhodobacter	0	0	0	0	0	0	0	0	0	0	0	0
d__Bacteria|p__Proteobacteria|c__Alphaproteobacteria|o__Rhodobacterales|f__Rhodobacteraceae|g__Rhodobacter|s__Rhodobacter_blasticus	0	0	0	0	0	0	0	0	0	0	0	0
d__Bacteria|p__Proteobacteria|c__Alphaproteobacteria|o__Rhodospirillales	0.01677	0.01165	0.06098	0.00937	0	0.01383	0.03744	0	0.02974	0.01675	0.01344	0.00857
d__Bacteria|p__Proteobacteria|c__Alphaproteobacteria|o__Rhodospirillales|f__Acetobacteraceae	0.01677	0.01165	0.0061	0.00937	0	0.01383	0.03744	0	0.02974	0.01675	0.01344	0.00857
d__Bacteria|p__Proteobacteria|c__Alphaproteobacteria|o__Rhodospirillales|f__Acetobacteraceae|g__Roseomonas	0.01677	0.01165	0.0061	0.00937	0	0.01383	0.03744	0	0.02974	0.01675	0.01344	0.00857
d__Bacteria|p__Proteobacteria|c__Alphaproteobacteria|o__Rhodospirillales|f__Acetobacteraceae|g__Roseomonas|s__Roseomonas_sp._S-NB-12	0.01677	0.01165	0.0061	0.00937	0	0.01383	0.03744	0	0.02974	0.01675	0.01344	0.00857
d__Bacteria|p__Proteobacteria|c__Alphaproteobacteria|o__Rhodospirillales|f__Rhodospirillaceae	0	0	0.05488	0	0	0	0	0	0	0	0	0
d__Bacteria|p__Proteobacteria|c__Alphaproteobacteria|o__Rhodospirillales|f__Rhodospirillaceae|g__Insolitispirillum	0	0	0	0	0	0	0	0	0	0	0	0
d__Bacteria|p__Proteobacteria|c__Alphaproteobacteria|o__Rhodospirillales|f__Rhodospirillaceae|g__Insolitispirillum|s__uncultured_Insolitispirillum_sp.	0	0	0	0	0	0	0	0	0	0	0	0
d__Bacteria|p__Proteobacteria|c__Alphaproteobacteria|o__Rhodospirillales|f__Rhodospirillaceae|g__Thalassospira	0	0	0.05488	0	0	0	0	0	0	0	0	0
d__Bacteria|p__Proteobacteria|c__Alphaproteobacteria|o__Rhodospirillales|f__Rhodospirillaceae|g__Thalassospira|s__uncultured_Thalassospira_sp.	0	0	0.05488	0	0	0	0	0	0	0	0	0
d__Bacteria|p__Proteobacteria|c__Alphaproteobacteria|o__Rickettsiales	0.00915	0.01165	0	0	0.00616	0.00307	0	0	0	0	0	0
d__Bacteria|p__Proteobacteria|c__Alphaproteobacteria|o__Rickettsiales|f__Mitochondria	0.00915	0.01165	0	0	0.00616	0.00307	0	0	0	0	0	0
d__Bacteria|p__Proteobacteria|c__Alphaproteobacteria|o__Rickettsiales|f__Mitochondria|g__Mitochondria_unclassified	0.00915	0.01165	0	0	0.00616	0.00307	0	0	0	0	0	0
d__Bacteria|p__Proteobacteria|c__Alphaproteobacteria|o__Rickettsiales|f__Mitochondria|g__Mitochondria_unclassified|s__Mitochondria_unclassified	0.00915	0.01165	0	0	0.00616	0.00307	0	0	0	0	0	0
d__Bacteria|p__Proteobacteria|c__Alphaproteobacteria|o__Sphingomonadales	0.01219	0.0335	0.02134	0.0203	0	0.00615	0.02246	0	0.02348	0.02131	0.00896	0.01143
d__Bacteria|p__Proteobacteria|c__Alphaproteobacteria|o__Sphingomonadales|f__Sphingomonadaceae	0.01219	0.0335	0.02134	0.0203	0	0.00615	0.02246	0	0.02348	0.02131	0.00896	0.01143
d__Bacteria|p__Proteobacteria|c__Alphaproteobacteria|o__Sphingomonadales|f__Sphingomonadaceae|g__Novosphingobium	0	0.00437	0.0061	0	0	0	0.00599	0	0	0	0	0
d__Bacteria|p__Proteobacteria|c__Alphaproteobacteria|o__Sphingomonadales|f__Sphingomonadaceae|g__Novosphingobium|s__Novosphingobium_endophyticum	0	0.00437	0.0061	0	0	0	0.00599	0	0	0	0	0
d__Bacteria|p__Proteobacteria|c__Alphaproteobacteria|o__Sphingomonadales|f__Sphingomonadaceae|g__Novosphingobium|s__Novosphingobium_unclassified	0	0	0	0	0	0	0	0	0	0	0	0
d__Bacteria|p__Proteobacteria|c__Alphaproteobacteria|o__Sphingomonadales|f__Sphingomonadaceae|g__Sphingobium	0	0.01165	0.00762	0.00625	0	0	0	0	0	0.00761	0	0
d__Bacteria|p__Proteobacteria|c__Alphaproteobacteria|o__Sphingomonadales|f__Sphingomonadaceae|g__Sphingobium|s__Sphingobium_xenophagum	0	0.01165	0.00762	0.00625	0	0	0	0	0	0.00761	0	0
d__Bacteria|p__Proteobacteria|c__Alphaproteobacteria|o__Sphingomonadales|f__Sphingomonadaceae|g__Sphingomonas	0.01219	0.01748	0.00762	0.01405	0	0.00615	0.01647	0	0.02348	0.0137	0.00896	0.01143
d__Bacteria|p__Proteobacteria|c__Alphaproteobacteria|o__Sphingomonadales|f__Sphingomonadaceae|g__Sphingomonas|s__Sphingomonas_sp._Gossyppi_A5.1	0.01219	0	0.00762	0	0	0	0	0	0	0	0	0
d__Bacteria|p__Proteobacteria|c__Alphaproteobacteria|o__Sphingomonadales|f__Sphingomonadaceae|g__Sphingomonas|s__Sphingomonas_sp._Sph11	0	0.01748	0	0.01405	0	0	0.01647	0	0.02348	0.0137	0.00896	0.01143
d__Bacteria|p__Proteobacteria|c__Alphaproteobacteria|o__Sphingomonadales|f__Sphingomonadaceae|g__Sphingomonas|s__Sphingomonas_unclassified	0	0	0	0	0	0.00615	0	0	0	0	0	0
d__Bacteria|p__Proteobacteria|c__Alphaproteobacteria|o__Sphingomonadales|f__Sphingomonadaceae|g__Sphingomonas|s__uncultured_Sphingomonas_sp.	0	0	0	0	0	0	0	0	0	0	0	0
d__Bacteria|p__Proteobacteria|c__Betaproteobacteria	0.02744	0.06846	0.05183	0.09994	0.08619	0.09837	0.10482	0.09935	0.036	0.06241	0.06274	0.08717
d__Bacteria|p__Proteobacteria|c__Betaproteobacteria|o__Burkholderiales	0	0.0102	0	0.00781	0	0	0	0	0.00626	0.00761	0.00896	0.01143
d__Bacteria|p__Proteobacteria|c__Betaproteobacteria|o__Burkholderiales|f__Burkholderiales_unclassified	0	0.0102	0	0.00781	0	0	0	0	0.00626	0.00761	0.00896	0.01143
d__Bacteria|p__Proteobacteria|c__Betaproteobacteria|o__Burkholderiales|f__Burkholderiales_unclassified|g__Burkholderiales_unclassified	0	0.0102	0	0.00781	0	0	0	0	0.00626	0.00761	0.00896	0.01143
d__Bacteria|p__Proteobacteria|c__Betaproteobacteria|o__Burkholderiales|f__Burkholderiales_unclassified|g__Burkholderiales_unclassified|s__Burkholderiales_unclassified	0	0.0102	0	0.00781	0	0	0	0	0.00626	0.00761	0.00896	0.01143
d__Bacteria|p__Proteobacteria|c__Betaproteobacteria|o__Burkholderiales|f__Comamonadaceae	0	0	0	0	0	0	0	0	0	0	0	0
d__Bacteria|p__Proteobacteria|c__Betaproteobacteria|o__Burkholderiales|f__Comamonadaceae|g__Acidovorax	0	0	0	0	0	0	0	0	0	0	0	0
d__Bacteria|p__Proteobacteria|c__Betaproteobacteria|o__Burkholderiales|f__Comamonadaceae|g__Acidovorax|s__Acidovorax_sp.	0	0	0	0	0	0	0	0	0	0	0	0
d__Bacteria|p__Proteobacteria|c__Betaproteobacteria|o__Neisseriales	0.02744	0.05826	0.05183	0.09213	0.08619	0.09837	0.10482	0.09935	0.02974	0.0548	0.05378	0.07574
d__Bacteria|p__Proteobacteria|c__Betaproteobacteria|o__Neisseriales|f__Neisseriaceae	0.02744	0.05826	0.05183	0.09213	0.08619	0.09837	0.10482	0.09935	0.02974	0.0548	0.05378	0.07574
d__Bacteria|p__Proteobacteria|c__Betaproteobacteria|o__Neisseriales|f__Neisseriaceae|g__Neisseria	0.02744	0.05826	0.05183	0.09213	0.08619	0.09837	0.10482	0.09935	0.02974	0.0548	0.05378	0.07574
d__Bacteria|p__Proteobacteria|c__Betaproteobacteria|o__Neisseriales|f__Neisseriaceae|g__Neisseria|s__Neisseria_sp._10022	0.02744	0.05826	0.05183	0.09213	0.08619	0.09837	0.10482	0.09935	0.02974	0.0548	0.05378	0.07574
d__Bacteria|p__Proteobacteria|c__Deltaproteobacteria	0	0	0.00457	0	0.00308	0	0	0.02559	0.02661	0.00304	0.03137	0.02001
d__Bacteria|p__Proteobacteria|c__Deltaproteobacteria|o__Desulfovibrionales	0	0	0.00457	0	0.00308	0	0	0.02559	0.02661	0.00304	0.03137	0.02001
d__Bacteria|p__Proteobacteria|c__Deltaproteobacteria|o__Desulfovibrionales|f__Desulfovibrionaceae	0	0	0.00457	0	0.00308	0	0	0.02559	0.02661	0.00304	0.03137	0.02001
d__Bacteria|p__Proteobacteria|c__Deltaproteobacteria|o__Desulfovibrionales|f__Desulfovibrionaceae|g__Desulfovibrio	0	0	0.00457	0	0.00308	0	0	0.02559	0.02661	0.00304	0.03137	0.02001
d__Bacteria|p__Proteobacteria|c__Deltaproteobacteria|o__Desulfovibrionales|f__Desulfovibrionaceae|g__Desulfovibrio|s__Desulfovibrio_sp.	0	0	0	0	0	0	0	0.02107	0	0	0.0239	0
d__Bacteria|p__Proteobacteria|c__Deltaproteobacteria|o__Desulfovibrionales|f__Desulfovibrionaceae|g__Desulfovibrio|s__Desulfovibrio_sp._ABHU1SB	0	0	0	0	0	0	0	0	0.01878	0	0	0.01715
d__Bacteria|p__Proteobacteria|c__Deltaproteobacteria|o__Desulfovibrionales|f__Desulfovibrionaceae|g__Desulfovibrio|s__Desulfovibrio_sp._ABHU1SBfatS	0	0	0	0	0	0	0	0	0	0	0	0
d__Bacteria|p__Proteobacteria|c__Deltaproteobacteria|o__Desulfovibrionales|f__Desulfovibrionaceae|g__Desulfovibrio|s__uncultured_Desulfovibrio_sp.	0	0	0.00457	0	0.00308	0	0	0.00452	0.00783	0.00304	0.00747	0.00286
d__Bacteria|p__Proteobacteria|c__Gammaproteobacteria	1.39776	2.51108	1.59458	1.84879	1.45453	1.43865	1.37916	1.39543	1.3211	1.22393	1.4729	1.81635
d__Bacteria|p__Proteobacteria|c__Gammaproteobacteria|o__Aeromonadales	0	0	0	0	0	0	0	0	0	0	0.00448	0
d__Bacteria|p__Proteobacteria|c__Gammaproteobacteria|o__Aeromonadales|f__Aeromonadaceae	0	0	0	0	0	0	0	0	0	0	0	0
d__Bacteria|p__Proteobacteria|c__Gammaproteobacteria|o__Aeromonadales|f__Aeromonadaceae|g__Aeromonas	0	0	0	0	0	0	0	0	0	0	0	0
d__Bacteria|p__Proteobacteria|c__Gammaproteobacteria|o__Aeromonadales|f__Aeromonadaceae|g__Aeromonas|s__Aeromonas_sp._VKM_B-2261	0	0	0	0	0	0	0	0	0	0	0	0
d__Bacteria|p__Proteobacteria|c__Gammaproteobacteria|o__Aeromonadales|f__Succinivibrionaceae	0	0	0	0	0	0	0	0	0	0	0.00448	0
d__Bacteria|p__Proteobacteria|c__Gammaproteobacteria|o__Aeromonadales|f__Succinivibrionaceae|g__Anaerobiospirillum	0	0	0	0	0	0	0	0	0	0	0.00448	0
d__Bacteria|p__Proteobacteria|c__Gammaproteobacteria|o__Aeromonadales|f__Succinivibrionaceae|g__Anaerobiospirillum|s__Anaerobiospirillum_succiniciproducens	0	0	0	0	0	0	0	0	0	0	0.00448	0
d__Bacteria|p__Proteobacteria|c__Gammaproteobacteria|o__Burkholderiales	0.0442	0.06118	0.1738	0.05934	0.06773	0.13219	0.04941	0.01957	0.04383	0.07002	0.05228	0.2558
d__Bacteria|p__Proteobacteria|c__Gammaproteobacteria|o__Burkholderiales|f__Alcaligenaceae	0	0.00874	0.0061	0.00468	0	0.00461	0	0	0	0	0.00448	0
d__Bacteria|p__Proteobacteria|c__Gammaproteobacteria|o__Burkholderiales|f__Alcaligenaceae|g__Alcaligenes	0	0	0	0	0	0.00461	0	0	0	0	0	0
d__Bacteria|p__Proteobacteria|c__Gammaproteobacteria|o__Burkholderiales|f__Alcaligenaceae|g__Alcaligenes|s__Alcaligenes_unclassified	0	0	0	0	0	0.00461	0	0	0	0	0	0
d__Bacteria|p__Proteobacteria|c__Gammaproteobacteria|o__Burkholderiales|f__Alcaligenaceae|g__Oligella	0	0.00874	0.0061	0.00468	0	0	0	0	0	0	0.00448	0
d__Bacteria|p__Proteobacteria|c__Gammaproteobacteria|o__Burkholderiales|f__Alcaligenaceae|g__Oligella|s__Oligella_unclassified	0	0.00874	0.0061	0.00468	0	0	0	0	0	0	0.00448	0
d__Bacteria|p__Proteobacteria|c__Gammaproteobacteria|o__Burkholderiales|f__Burkholderiaceae	0.03658	0.03059	0.01677	0.02655	0.04618	0.00769	0.03893	0.01355	0.0407	0.0411	0.03585	0.19721
d__Bacteria|p__Proteobacteria|c__Gammaproteobacteria|o__Burkholderiales|f__Burkholderiaceae|g__Burkholderia-Caballeronia-Paraburkholderia	0	0.0102	0.0061	0	0	0	0	0	0	0.01827	0	0
d__Bacteria|p__Proteobacteria|c__Gammaproteobacteria|o__Burkholderiales|f__Burkholderiaceae|g__Burkholderia-Caballeronia-Paraburkholderia|s__Burkholderia-Caballeronia-Paraburkholderia_unclassified	0	0.0102	0.0061	0	0	0	0	0	0	0.01827	0	0
d__Bacteria|p__Proteobacteria|c__Gammaproteobacteria|o__Burkholderiales|f__Burkholderiaceae|g__Ralstonia	0.03658	0.02039	0.01067	0.02655	0.04618	0.00769	0.03893	0.01355	0.0407	0.02283	0.03585	0.19721
d__Bacteria|p__Proteobacteria|c__Gammaproteobacteria|o__Burkholderiales|f__Burkholderiaceae|g__Ralstonia|s__Ralstonia_unclassified	0.03658	0.02039	0.01067	0.02655	0.04618	0.00769	0.03893	0.01355	0.0407	0.02283	0.03585	0.19721
d__Bacteria|p__Proteobacteria|c__Gammaproteobacteria|o__Burkholderiales|f__Comamonadaceae	0	0	0.0061	0	0	0	0.00299	0	0.00313	0	0	0.02001
d__Bacteria|p__Proteobacteria|c__Gammaproteobacteria|o__Burkholderiales|f__Comamonadaceae|g__Aquabacterium	0	0	0.0061	0	0	0	0.00299	0	0.00313	0	0	0.02001
d__Bacteria|p__Proteobacteria|c__Gammaproteobacteria|o__Burkholderiales|f__Comamonadaceae|g__Aquabacterium|s__Aquabacterium_unclassified	0	0	0.0061	0	0	0	0.00299	0	0.00313	0	0	0.02001
d__Bacteria|p__Proteobacteria|c__Gammaproteobacteria|o__Burkholderiales|f__Comamonadaceae|g__Delftia	0	0	0	0	0	0	0	0	0	0	0	0
d__Bacteria|p__Proteobacteria|c__Gammaproteobacteria|o__Burkholderiales|f__Comamonadaceae|g__Delftia|s__Delftia_unclassified	0	0	0	0	0	0	0	0	0	0	0	0
d__Bacteria|p__Proteobacteria|c__Gammaproteobacteria|o__Burkholderiales|f__Oxalobacteraceae	0	0.01602	0.0122	0	0	0.00769	0	0	0	0.02283	0.01195	0.00857
d__Bacteria|p__Proteobacteria|c__Gammaproteobacteria|o__Burkholderiales|f__Oxalobacteraceae|g__Massilia	0	0.01602	0.0122	0	0	0.00769	0	0	0	0.02283	0.01195	0.00857
d__Bacteria|p__Proteobacteria|c__Gammaproteobacteria|o__Burkholderiales|f__Oxalobacteraceae|g__Massilia|s__Massilia_unclassified	0	0.01602	0.0122	0	0	0.00769	0	0	0	0.02283	0.01195	0.00857
d__Bacteria|p__Proteobacteria|c__Gammaproteobacteria|o__Burkholderiales|f__Rhodocyclaceae	0	0	0	0.01093	0.01231	0	0	0.00602	0	0.00609	0	0.03001
d__Bacteria|p__Proteobacteria|c__Gammaproteobacteria|o__Burkholderiales|f__Rhodocyclaceae|g__Dechloromonas	0	0	0	0	0	0	0	0	0	0	0	0
d__Bacteria|p__Proteobacteria|c__Gammaproteobacteria|o__Burkholderiales|f__Rhodocyclaceae|g__Dechloromonas|s__Dechloromonas_unclassified	0	0	0	0	0	0	0	0	0	0	0	0
d__Bacteria|p__Proteobacteria|c__Gammaproteobacteria|o__Burkholderiales|f__Rhodocyclaceae|g__Methyloversatilis	0	0	0	0.01093	0.01231	0	0	0.00602	0	0.00609	0	0.03001
d__Bacteria|p__Proteobacteria|c__Gammaproteobacteria|o__Burkholderiales|f__Rhodocyclaceae|g__Methyloversatilis|s__Methyloversatilis_unclassified	0	0	0	0.01093	0.01231	0	0	0.00602	0	0.00609	0	0.03001
d__Bacteria|p__Proteobacteria|c__Gammaproteobacteria|o__Burkholderiales|f__Sutterellaceae	0.00762	0.00583	0.13263	0.01718	0.00924	0.1122	0.00749	0	0	0	0	0
d__Bacteria|p__Proteobacteria|c__Gammaproteobacteria|o__Burkholderiales|f__Sutterellaceae|g__Parasutterella	0.00762	0.00583	0.13263	0.01718	0.00924	0.1122	0.00749	0	0	0	0	0
d__Bacteria|p__Proteobacteria|c__Gammaproteobacteria|o__Burkholderiales|f__Sutterellaceae|g__Parasutterella|s__Parasutterella_unclassified	0.00762	0.00583	0.13263	0.01718	0.00924	0.1122	0.00749	0	0	0	0	0
d__Bacteria|p__Proteobacteria|c__Gammaproteobacteria|o__Enterobacterales	0.7408	1.75513	0.90401	0.96187	0.61413	0.77773	0.58102	0.78578	0.7482	0.46127	0.82609	0.72597
d__Bacteria|p__Proteobacteria|c__Gammaproteobacteria|o__Enterobacterales|f__Enterobacteriaceae	0.23322	1.36332	0.23782	0.5309	0.20009	0.20289	0.18268	0.10989	0.24575	0.13397	0.20615	0.22722
d__Bacteria|p__Proteobacteria|c__Gammaproteobacteria|o__Enterobacterales|f__Enterobacteriaceae|g__Citrobacter	0	0	0	0	0	0	0	0	0	0	0	0.01143
d__Bacteria|p__Proteobacteria|c__Gammaproteobacteria|o__Enterobacterales|f__Enterobacteriaceae|g__Citrobacter|s__Citrobacter_koseri	0	0	0	0	0	0	0	0	0	0	0	0
d__Bacteria|p__Proteobacteria|c__Gammaproteobacteria|o__Enterobacterales|f__Enterobacteriaceae|g__Citrobacter|s__uncultured_Citrobacter_sp.	0	0	0	0	0	0	0	0	0	0	0	0.01143
d__Bacteria|p__Proteobacteria|c__Gammaproteobacteria|o__Enterobacterales|f__Enterobacteriaceae|g__Enterobacter	0	0	0	0	0	0	0	0	0	0	0	0
d__Bacteria|p__Proteobacteria|c__Gammaproteobacteria|o__Enterobacterales|f__Enterobacteriaceae|g__Enterobacteriaceae_unclassified	0	0	0	0	0	0	0	0	0	0	0	0
d__Bacteria|p__Proteobacteria|c__Gammaproteobacteria|o__Enterobacterales|f__Enterobacteriaceae|g__Enterobacteriaceae_unclassified|s__Enterobacteriaceae_unclassified	0	0	0	0	0	0	0	0	0	0	0	0
d__Bacteria|p__Proteobacteria|c__Gammaproteobacteria|o__Enterobacterales|f__Enterobacteriaceae|g__Enterobacter|s__Enterobacter_sp._EMB-71	0	0	0	0	0	0	0	0	0	0	0	0
d__Bacteria|p__Proteobacteria|c__Gammaproteobacteria|o__Enterobacterales|f__Enterobacteriaceae|g__Enterobacter|s__Enterobacter_sp._NJ-64	0	0	0	0	0	0	0	0	0	0	0	0
d__Bacteria|p__Proteobacteria|c__Gammaproteobacteria|o__Enterobacterales|f__Enterobacteriaceae|g__Enterobacter|s__uncultured_Enterobacter_sp.	0	0	0	0	0	0	0	0	0	0	0	0
d__Bacteria|p__Proteobacteria|c__Gammaproteobacteria|o__Enterobacterales|f__Enterobacteriaceae|g__Escherichia	0	0	0	0	0	0	0	0	0	0	0	0
d__Bacteria|p__Proteobacteria|c__Gammaproteobacteria|o__Enterobacterales|f__Enterobacteriaceae|g__Escherichia-Shigella	0.13109	0.15294	0.19818	0.41535	0.10159	0.17983	0.08236	0.05419	0.03287	0.10961	0.16133	0.19721
d__Bacteria|p__Proteobacteria|c__Gammaproteobacteria|o__Enterobacterales|f__Enterobacteriaceae|g__Escherichia-Shigella|s__Escherichia-Shigella_unclassified	0.13109	0.15294	0.19818	0.41535	0.10159	0.17983	0.08236	0.05419	0.03287	0.10961	0.16133	0.19721
d__Bacteria|p__Proteobacteria|c__Gammaproteobacteria|o__Enterobacterales|f__Enterobacteriaceae|g__Escherichia|s__Escherichia_sp._CPD32	0	0	0	0	0	0	0	0	0	0	0	0
d__Bacteria|p__Proteobacteria|c__Gammaproteobacteria|o__Enterobacterales|f__Enterobacteriaceae|g__Klebsiella	0.10213	1.21038	0.03964	0.11555	0.0985	0.02306	0.10032	0.0557	0.21288	0.02436	0.03884	0.01858
d__Bacteria|p__Proteobacteria|c__Gammaproteobacteria|o__Enterobacterales|f__Enterobacteriaceae|g__Klebsiella|s__Klebsiella_oxytoca	0.10213	0.45881	0.03964	0.09057	0.04925	0.02306	0	0.0286	0	0.01066	0.01046	0
d__Bacteria|p__Proteobacteria|c__Gammaproteobacteria|o__Enterobacterales|f__Enterobacteriaceae|g__Klebsiella|s__Klebsiella_pneumoniae	0	0.44133	0	0.02498	0	0	0.0569	0.0271	0.12366	0.0137	0.02838	0.01858
d__Bacteria|p__Proteobacteria|c__Gammaproteobacteria|o__Enterobacterales|f__Enterobacteriaceae|g__Klebsiella|s__Klebsiella_sp.	0	0.09467	0	0	0	0	0	0	0	0	0	0
d__Bacteria|p__Proteobacteria|c__Gammaproteobacteria|o__Enterobacterales|f__Enterobacteriaceae|g__Klebsiella|s__Klebsiella_unclassified	0	0.134	0	0	0.04925	0	0.02246	0	0.05948	0	0	0
d__Bacteria|p__Proteobacteria|c__Gammaproteobacteria|o__Enterobacterales|f__Enterobacteriaceae|g__Klebsiella|s__uncultured_Klebsiella_sp.	0	0.08157	0	0	0	0	0.02096	0	0.02974	0	0	0
d__Bacteria|p__Proteobacteria|c__Gammaproteobacteria|o__Enterobacterales|f__Enterobacteriaceae|g__Plesiomonas	0	0	0	0	0	0	0	0	0	0	0.00598	0
d__Bacteria|p__Proteobacteria|c__Gammaproteobacteria|o__Enterobacterales|f__Enterobacteriaceae|g__Plesiomonas|s__Plesiomonas_unclassified	0	0	0	0	0	0	0	0	0	0	0.00598	0
d__Bacteria|p__Proteobacteria|c__Gammaproteobacteria|o__Enterobacterales|f__Erwiniaceae	0	0	0	0	0	0	0	0	0	0	0	0
d__Bacteria|p__Proteobacteria|c__Gammaproteobacteria|o__Enterobacterales|f__Erwiniaceae|g__Erwinia	0	0	0	0	0	0	0	0	0	0	0	0
d__Bacteria|p__Proteobacteria|c__Gammaproteobacteria|o__Enterobacterales|f__Erwiniaceae|g__Erwinia|s__Erwinia_sp.	0	0	0	0	0	0	0	0	0	0	0	0
d__Bacteria|p__Proteobacteria|c__Gammaproteobacteria|o__Enterobacterales|f__Erwiniaceae|g__Pantoea	0	0	0	0	0	0	0	0	0	0	0	0
d__Bacteria|p__Proteobacteria|c__Gammaproteobacteria|o__Enterobacterales|f__Erwiniaceae|g__Pantoea|s__Pantoea_agglomerans	0	0	0	0	0	0	0	0	0	0	0	0
d__Bacteria|p__Proteobacteria|c__Gammaproteobacteria|o__Enterobacterales|f__Morganellaceae	0.00457	0	0	0	0	0	0	0	0	0	0	0.01
d__Bacteria|p__Proteobacteria|c__Gammaproteobacteria|o__Enterobacterales|f__Morganellaceae|g__Proteus	0.00457	0	0	0	0	0	0	0	0	0	0	0.01
d__Bacteria|p__Proteobacteria|c__Gammaproteobacteria|o__Enterobacterales|f__Morganellaceae|g__Proteus|s__Proteus_mirabilis	0.00457	0	0	0	0	0	0	0	0	0	0	0.01
d__Bacteria|p__Proteobacteria|c__Gammaproteobacteria|o__Enterobacterales|f__Pasteurellaceae	0.50301	0.39181	0.66619	0.43097	0.41404	0.57484	0.39834	0.67589	0.50245	0.3273	0.61994	0.48875
d__Bacteria|p__Proteobacteria|c__Gammaproteobacteria|o__Enterobacterales|f__Pasteurellaceae|g__Haemophilus	0	0	0	0	0	0	0	0	0	0	0	0
d__Bacteria|p__Proteobacteria|c__Gammaproteobacteria|o__Enterobacterales|f__Pasteurellaceae|g__Haemophilus|s__Haemophilus_unclassified	0	0	0	0	0	0	0	0	0	0	0	0
d__Bacteria|p__Proteobacteria|c__Gammaproteobacteria|o__Enterobacterales|f__Pasteurellaceae|g__Muribacter	0.22712	0.12672	0.20733	0.14522	0.22318	0.1537	0.19318	0.35676	0.21131	0.10047	0.25843	0.1915
d__Bacteria|p__Proteobacteria|c__Gammaproteobacteria|o__Enterobacterales|f__Pasteurellaceae|g__Muribacter|s__Muribacter_unclassified	0.22712	0.12672	0.20733	0.14522	0.22318	0.1537	0.19318	0.35676	0.21131	0.10047	0.25843	0.1915
d__Bacteria|p__Proteobacteria|c__Gammaproteobacteria|o__Enterobacterales|f__Pasteurellaceae|g__Rodentibacter	0.27589	0.26509	0.45886	0.28575	0.19086	0.42114	0.20516	0.31913	0.29114	0.22683	0.36151	0.29725
d__Bacteria|p__Proteobacteria|c__Gammaproteobacteria|o__Enterobacterales|f__Pasteurellaceae|g__Rodentibacter|s__Rodentibacter_unclassified	0.27589	0.26509	0.45886	0.28575	0.19086	0.42114	0.20516	0.31913	0.29114	0.22683	0.36151	0.29725
d__Bacteria|p__Proteobacteria|c__Gammaproteobacteria|o__Pasteurellales	0.13109	0.18061	0.11738	0.15771	0.18009	0.08607	0.10482	0.2017	0.14557	0.1842	0.23005	0.15863
d__Bacteria|p__Proteobacteria|c__Gammaproteobacteria|o__Pasteurellales|f__Pasteurellaceae	0.13109	0.18061	0.11738	0.15771	0.18009	0.08607	0.10482	0.2017	0.14557	0.1842	0.23005	0.15863
d__Bacteria|p__Proteobacteria|c__Gammaproteobacteria|o__Pasteurellales|f__Pasteurellaceae|g__Avibacterium	0.02134	0.02913	0.02744	0.01718	0.02309	0	0.01348	0.02107	0.01722	0.02131	0.01942	0.02001
d__Bacteria|p__Proteobacteria|c__Gammaproteobacteria|o__Pasteurellales|f__Pasteurellaceae|g__Avibacterium|s__Avibacterium_gallinarum	0.02134	0.02913	0.02744	0.01718	0.02309	0	0.01348	0.02107	0.01722	0.02131	0.01942	0.02001
d__Bacteria|p__Proteobacteria|c__Gammaproteobacteria|o__Pasteurellales|f__Pasteurellaceae|g__Muribacter	0.07012	0.06409	0.08994	0.08588	0.11698	0.02459	0.06289	0.09182	0.07513	0.07916	0.09561	0.10289
d__Bacteria|p__Proteobacteria|c__Gammaproteobacteria|o__Pasteurellales|f__Pasteurellaceae|g__Muribacter|s__Muribacter_muris	0.07012	0.06409	0.08994	0.08588	0.11698	0.02459	0.06289	0.09182	0.07513	0.07916	0.09561	0.10289
d__Bacteria|p__Proteobacteria|c__Gammaproteobacteria|o__Pasteurellales|f__Pasteurellaceae|g__Pasteurellaceae_unclassified	0.03963	0.08739	0	0.05465	0.04002	0.06148	0.02845	0.08881	0.05322	0.08373	0.11502	0.03573
d__Bacteria|p__Proteobacteria|c__Gammaproteobacteria|o__Pasteurellales|f__Pasteurellaceae|g__Pasteurellaceae_unclassified|s__Pasteurellaceae_unclassified	0.03963	0.08739	0	0.05465	0.04002	0.06148	0.02845	0.08881	0.05322	0.08373	0.11502	0.03573
d__Bacteria|p__Proteobacteria|c__Gammaproteobacteria|o__Pseudomonadales	0.48167	0.51416	0.39482	0.66362	0.59258	0.44266	0.63343	0.38838	0.38037	0.50844	0.35552	0.67595
d__Bacteria|p__Proteobacteria|c__Gammaproteobacteria|o__Pseudomonadales|f__Moraxellaceae	0.48167	0.50542	0.39482	0.66362	0.59258	0.44266	0.62295	0.38838	0.38037	0.50844	0.35552	0.67595
d__Bacteria|p__Proteobacteria|c__Gammaproteobacteria|o__Pseudomonadales|f__Moraxellaceae|g__Acinetobacter	0.21949	0.19955	0.33537	0.31385	0.18932	0.13987	0.32944	0.1686	0.15653	0.24356	0.28083	0.3244
d__Bacteria|p__Proteobacteria|c__Gammaproteobacteria|o__Pseudomonadales|f__Moraxellaceae|g__Acinetobacter|s__Acinetobacter_calcoaceticus	0.01829	0.08302	0.04268	0.07651	0.11236	0.0123	0.05541	0.09333	0.01878	0.10047	0.05228	0.0686
d__Bacteria|p__Proteobacteria|c__Gammaproteobacteria|o__Pseudomonadales|f__Moraxellaceae|g__Acinetobacter|s__Acinetobacter_junii	0	0	0	0	0.0077	0	0	0	0	0	0	0
d__Bacteria|p__Proteobacteria|c__Gammaproteobacteria|o__Pseudomonadales|f__Moraxellaceae|g__Acinetobacter|s__Acinetobacter_radioresistens	0	0.01311	0	0.00468	0	0.00615	0.00749	0.00753	0	0.0137	0	0.00286
d__Bacteria|p__Proteobacteria|c__Gammaproteobacteria|o__Pseudomonadales|f__Moraxellaceae|g__Acinetobacter|s__Acinetobacter_sp.	0	0	0	0	0	0	0	0	0	0	0	0
d__Bacteria|p__Proteobacteria|c__Gammaproteobacteria|o__Pseudomonadales|f__Moraxellaceae|g__Acinetobacter|s__Acinetobacter_sp._CNE_4	0.0945	0.0335	0.02896	0	0.01847	0.0292	0.07188	0.02409	0.05479	0.0548	0.01643	0
d__Bacteria|p__Proteobacteria|c__Gammaproteobacteria|o__Pseudomonadales|f__Moraxellaceae|g__Acinetobacter|s__Acinetobacter_sp._DSP11	0.06859	0.05972	0.03659	0	0.05079	0.05226	0.05091	0.04365	0.05792	0.06698	0	0
d__Bacteria|p__Proteobacteria|c__Gammaproteobacteria|o__Pseudomonadales|f__Moraxellaceae|g__Acinetobacter|s__Acinetobacter_sp._India-BSP-7	0	0.0102	0	0	0	0	0.02096	0	0	0	0	0
d__Bacteria|p__Proteobacteria|c__Gammaproteobacteria|o__Pseudomonadales|f__Moraxellaceae|g__Acinetobacter|s__Acinetobacter_sp._MG-2011-22-CW	0.03811	0	0.22714	0.23266	0	0.03996	0.12279	0	0.02504	0.00761	0.17627	0.22722
d__Bacteria|p__Proteobacteria|c__Gammaproteobacteria|o__Pseudomonadales|f__Moraxellaceae|g__Acinetobacter|s__Acinetobacter_unclassified	0	0	0	0	0	0	0	0	0	0	0	0.02572
d__Bacteria|p__Proteobacteria|c__Gammaproteobacteria|o__Pseudomonadales|f__Moraxellaceae|g__Acinetobacter|s__uncultured_Acinetobacter_sp.	0	0	0	0	0	0	0	0	0	0	0.03585	0
d__Bacteria|p__Proteobacteria|c__Gammaproteobacteria|o__Pseudomonadales|f__Moraxellaceae|g__Alkanindiges	0	0	0	0	0	0	0	0	0	0	0	0
d__Bacteria|p__Proteobacteria|c__Gammaproteobacteria|o__Pseudomonadales|f__Moraxellaceae|g__Alkanindiges|s__Alkanindiges_unclassified	0	0	0	0	0	0	0	0	0	0	0	0
d__Bacteria|p__Proteobacteria|c__Gammaproteobacteria|o__Pseudomonadales|f__Moraxellaceae|g__Enhydrobacter	0.26218	0.30587	0.05945	0.33103	0.40326	0.29972	0.29351	0.21978	0.22384	0.26488	0.07469	0.34012
d__Bacteria|p__Proteobacteria|c__Gammaproteobacteria|o__Pseudomonadales|f__Moraxellaceae|g__Enhydrobacter|s__Enhydrobacter_unclassified	0.26218	0.30587	0.05945	0.33103	0.40326	0.29972	0.29351	0.21978	0.22384	0.26488	0.07469	0.34012
d__Bacteria|p__Proteobacteria|c__Gammaproteobacteria|o__Pseudomonadales|f__Moraxellaceae|g__Moraxella	0	0	0	0.01874	0	0.00307	0	0	0	0	0	0.01143
d__Bacteria|p__Proteobacteria|c__Gammaproteobacteria|o__Pseudomonadales|f__Moraxellaceae|g__Moraxella|s__Moraxella_sp._feline_oral_taxon_350	0	0	0	0.01874	0	0.00307	0	0	0	0	0	0.01143
d__Bacteria|p__Proteobacteria|c__Gammaproteobacteria|o__Pseudomonadales|f__Pseudomonadaceae	0	0.00874	0	0	0	0	0.01048	0	0	0	0	0
d__Bacteria|p__Proteobacteria|c__Gammaproteobacteria|o__Pseudomonadales|f__Pseudomonadaceae|g__Pseudomonas	0	0.00874	0	0	0	0	0.01048	0	0	0	0	0
d__Bacteria|p__Proteobacteria|c__Gammaproteobacteria|o__Pseudomonadales|f__Pseudomonadaceae|g__Pseudomonas|s__Pseudomonas_graminis	0	0	0	0	0	0	0	0	0	0	0	0
d__Bacteria|p__Proteobacteria|c__Gammaproteobacteria|o__Pseudomonadales|f__Pseudomonadaceae|g__Pseudomonas|s__Pseudomonas_monteilii	0	0	0	0	0	0	0	0	0	0	0	0
d__Bacteria|p__Proteobacteria|c__Gammaproteobacteria|o__Pseudomonadales|f__Pseudomonadaceae|g__Pseudomonas|s__Pseudomonas_sp._CNE_19	0	0.00874	0	0	0	0	0	0	0	0	0	0
d__Bacteria|p__Proteobacteria|c__Gammaproteobacteria|o__Pseudomonadales|f__Pseudomonadaceae|g__Pseudomonas|s__Pseudomonas_sp._MG-2011-7-BJ	0	0	0	0	0	0	0	0	0	0	0	0
d__Bacteria|p__Proteobacteria|c__Gammaproteobacteria|o__Pseudomonadales|f__Pseudomonadaceae|g__Pseudomonas|s__Pseudomonas_sp._SMX331	0	0	0	0	0	0	0	0	0	0	0	0
d__Bacteria|p__Proteobacteria|c__Gammaproteobacteria|o__Pseudomonadales|f__Pseudomonadaceae|g__Pseudomonas|s__Pseudomonas_sp._XJ-2	0	0	0	0	0	0	0.01048	0	0	0	0	0
d__Bacteria|p__Proteobacteria|c__Gammaproteobacteria|o__Pseudomonadales|f__Pseudomonadaceae|g__Pseudomonas|s__Pseudomonas_syringae	0	0	0	0	0	0	0	0	0	0	0	0
d__Bacteria|p__Proteobacteria|c__Gammaproteobacteria|o__Vibrionales	0	0	0	0	0	0	0	0	0.00313	0	0	0
d__Bacteria|p__Proteobacteria|c__Gammaproteobacteria|o__Vibrionales|f__Vibrionaceae	0	0	0	0	0	0	0	0	0.00313	0	0	0
d__Bacteria|p__Proteobacteria|c__Gammaproteobacteria|o__Vibrionales|f__Vibrionaceae|g__Vibrio	0	0	0	0	0	0	0	0	0.00313	0	0	0
d__Bacteria|p__Proteobacteria|c__Gammaproteobacteria|o__Vibrionales|f__Vibrionaceae|g__Vibrio|s__Vibrio_sp._SQS2-3	0	0	0	0	0	0	0	0	0.00313	0	0	0
d__Bacteria|p__Proteobacteria|c__Gammaproteobacteria|o__Xanthomonadales	0	0	0.00457	0.00625	0	0	0.01048	0	0	0	0.00448	0
d__Bacteria|p__Proteobacteria|c__Gammaproteobacteria|o__Xanthomonadales|f__Rhodanobacteraceae	0	0	0	0	0	0	0	0	0	0	0	0
d__Bacteria|p__Proteobacteria|c__Gammaproteobacteria|o__Xanthomonadales|f__Rhodanobacteraceae|g__Dokdonella	0	0	0	0	0	0	0	0	0	0	0	0
d__Bacteria|p__Proteobacteria|c__Gammaproteobacteria|o__Xanthomonadales|f__Rhodanobacteraceae|g__Dokdonella|s__uncultured_Dokdonella_sp.	0	0	0	0	0	0	0	0	0	0	0	0
d__Bacteria|p__Proteobacteria|c__Gammaproteobacteria|o__Xanthomonadales|f__Rhodanobacteraceae|g__Rhodanobacter	0	0	0	0	0	0	0	0	0	0	0	0
d__Bacteria|p__Proteobacteria|c__Gammaproteobacteria|o__Xanthomonadales|f__Rhodanobacteraceae|g__Rhodanobacter|s__Rhodanobacter_sp.	0	0	0	0	0	0	0	0	0	0	0	0
d__Bacteria|p__Proteobacteria|c__Gammaproteobacteria|o__Xanthomonadales|f__Xanthomonadaceae	0	0	0.00457	0.00625	0	0	0.01048	0	0	0	0.00448	0
d__Bacteria|p__Proteobacteria|c__Gammaproteobacteria|o__Xanthomonadales|f__Xanthomonadaceae|g__Lysobacter	0	0	0	0	0	0	0.00449	0	0	0	0	0
d__Bacteria|p__Proteobacteria|c__Gammaproteobacteria|o__Xanthomonadales|f__Xanthomonadaceae|g__Lysobacter|s__Lysobacter_sp.	0	0	0	0	0	0	0	0	0	0	0	0
d__Bacteria|p__Proteobacteria|c__Gammaproteobacteria|o__Xanthomonadales|f__Xanthomonadaceae|g__Lysobacter|s__Lysobacter_unclassified	0	0	0	0	0	0	0.00449	0	0	0	0	0
d__Bacteria|p__Proteobacteria|c__Gammaproteobacteria|o__Xanthomonadales|f__Xanthomonadaceae|g__Xanthomonas	0	0	0.00457	0.00625	0	0	0.00599	0	0	0	0.00448	0
d__Bacteria|p__Proteobacteria|c__Gammaproteobacteria|o__Xanthomonadales|f__Xanthomonadaceae|g__Xanthomonas|s__Xanthomonas_phaseoli	0	0	0	0	0	0	0	0	0	0	0	0
d__Bacteria|p__Proteobacteria|c__Gammaproteobacteria|o__Xanthomonadales|f__Xanthomonadaceae|g__Xanthomonas|s__Xanthomonas_sp.	0	0	0.00457	0.00625	0	0	0.00599	0	0	0	0.00448	0
d__Bacteria|p__Spirochaetota	0	0	0.00457	0	0	0	0	0	0	0.00304	0.00299	0
d__Bacteria|p__Spirochaetota|c__Spirochaetia	0	0	0.00457	0	0	0	0	0	0	0.00304	0.00299	0
d__Bacteria|p__Spirochaetota|c__Spirochaetia|o__Spirochaetales	0	0	0.00457	0	0	0	0	0	0	0.00304	0.00299	0
d__Bacteria|p__Spirochaetota|c__Spirochaetia|o__Spirochaetales|f__Spirochaetaceae	0	0	0.00457	0	0	0	0	0	0	0.00304	0.00299	0
d__Bacteria|p__Spirochaetota|c__Spirochaetia|o__Spirochaetales|f__Spirochaetaceae|g__Spirochaetaceae_unclassified	0	0	0	0	0	0	0	0	0	0.00304	0	0
d__Bacteria|p__Spirochaetota|c__Spirochaetia|o__Spirochaetales|f__Spirochaetaceae|g__Spirochaetaceae_unclassified|s__Spirochaetaceae_unclassified	0	0	0	0	0	0	0	0	0	0.00304	0	0
d__Bacteria|p__Spirochaetota|c__Spirochaetia|o__Spirochaetales|f__Spirochaetaceae|g__Treponema	0	0	0.00457	0	0	0	0	0	0	0	0.00299	0
d__Bacteria|p__Spirochaetota|c__Spirochaetia|o__Spirochaetales|f__Spirochaetaceae|g__Treponema|s__Treponema_unclassified	0	0	0	0	0	0	0	0	0	0	0	0
d__Bacteria|p__Spirochaetota|c__Spirochaetia|o__Spirochaetales|f__Spirochaetaceae|g__Treponema|s__uncultured_Treponema_sp.	0	0	0.00457	0	0	0	0	0	0	0	0.00299	0
d__Bacteria|p__Synergistota	0	0	0	0	0	0	0	0	0	0.00457	0	0
d__Bacteria|p__Synergistota|c__Synergistia	0	0	0	0	0	0	0	0	0	0.00457	0	0
d__Bacteria|p__Synergistota|c__Synergistia|o__Synergistales	0	0	0	0	0	0	0	0	0	0.00457	0	0
d__Bacteria|p__Synergistota|c__Synergistia|o__Synergistales|f__Synergistaceae	0	0	0	0	0	0	0	0	0	0.00457	0	0
d__Bacteria|p__Synergistota|c__Synergistia|o__Synergistales|f__Synergistaceae|g__Synergistes	0	0	0	0	0	0	0	0	0	0.00457	0	0
d__Bacteria|p__Synergistota|c__Synergistia|o__Synergistales|f__Synergistaceae|g__Synergistes|s__Synergistes_unclassified	0	0	0	0	0	0	0	0	0	0.00457	0	0
d__Bacteria|p__Verrucomicrobiota	3.39608	1.27447	2.64951	1.32101	1.9763	2.6821	0.87154	0.849	0.76856	0.77639	0.847	0.95034
d__Bacteria|p__Verrucomicrobiota|c__Kiritimatiellae	0	0	0	0	0.00308	0.01537	0	0	0	0	0	0
d__Bacteria|p__Verrucomicrobiota|c__Kiritimatiellae|o__WCHB1-41	0	0	0	0	0.00308	0.01537	0	0	0	0	0	0
d__Bacteria|p__Verrucomicrobiota|c__Kiritimatiellae|o__WCHB1-41|f__WCHB1-41_unclassified	0	0	0	0	0.00308	0.01537	0	0	0	0	0	0
d__Bacteria|p__Verrucomicrobiota|c__Kiritimatiellae|o__WCHB1-41|f__WCHB1-41_unclassified|g__WCHB1-41_unclassified	0	0	0	0	0.00308	0.01537	0	0	0	0	0	0
d__Bacteria|p__Verrucomicrobiota|c__Kiritimatiellae|o__WCHB1-41|f__WCHB1-41_unclassified|g__WCHB1-41_unclassified|s__WCHB1-41_unclassified	0	0	0	0	0.00308	0.01537	0	0	0	0	0	0
d__Bacteria|p__Verrucomicrobiota|c__Verrucomicrobiae	3.39608	1.27447	2.64951	1.32101	1.97322	2.66673	0.87154	0.849	0.76856	0.77639	0.847	0.95034
d__Bacteria|p__Verrucomicrobiota|c__Verrucomicrobiae|o__Chthoniobacterales	0	0.00291	0	0	0	0	0	0	0	0	0	0
d__Bacteria|p__Verrucomicrobiota|c__Verrucomicrobiae|o__Chthoniobacterales|f__Xiphinematobacteraceae	0	0.00291	0	0	0	0	0	0	0	0	0	0
d__Bacteria|p__Verrucomicrobiota|c__Verrucomicrobiae|o__Chthoniobacterales|f__Xiphinematobacteraceae|g__Candidatus_Xiphinematobacter	0	0.00291	0	0	0	0	0	0	0	0	0	0
d__Bacteria|p__Verrucomicrobiota|c__Verrucomicrobiae|o__Chthoniobacterales|f__Xiphinematobacteraceae|g__Candidatus_Xiphinematobacter|s__Candidatus_Xiphinematobacter_unclassified	0	0.00291	0	0	0	0	0	0	0	0	0	0
d__Bacteria|p__Verrucomicrobiota|c__Verrucomicrobiae|o__Verrucomicrobiales	3.39608	1.27156	2.64951	1.32101	1.97322	2.66673	0.87154	0.849	0.76856	0.77639	0.847	0.95034
d__Bacteria|p__Verrucomicrobiota|c__Verrucomicrobiae|o__Verrucomicrobiales|f__Akkermansiaceae	3.39608	1.27156	2.64951	1.32101	1.97322	2.66673	0.87154	0.849	0.76856	0.77639	0.847	0.93033
d__Bacteria|p__Verrucomicrobiota|c__Verrucomicrobiae|o__Verrucomicrobiales|f__Akkermansiaceae|g__Akkermansia	3.39608	1.27156	2.64951	1.32101	1.97322	2.66673	0.87154	0.849	0.76856	0.77639	0.847	0.93033
d__Bacteria|p__Verrucomicrobiota|c__Verrucomicrobiae|o__Verrucomicrobiales|f__Akkermansiaceae|g__Akkermansia|s__Akkermansia_unclassified	3.39608	1.27156	2.64951	1.32101	1.97322	2.66673	0.87154	0.849	0.76856	0.77639	0.847	0.93033
d__Bacteria|p__Verrucomicrobiota|c__Verrucomicrobiae|o__Verrucomicrobiales|f__Verrucomicrobiaceae	0	0	0	0	0	0	0	0	0	0	0	0.02001
d__Bacteria|p__Verrucomicrobiota|c__Verrucomicrobiae|o__Verrucomicrobiales|f__Verrucomicrobiaceae|g__Prosthecobacter	0	0	0	0	0	0	0	0	0	0	0	0.02001
d__Bacteria|p__Verrucomicrobiota|c__Verrucomicrobiae|o__Verrucomicrobiales|f__Verrucomicrobiaceae|g__Prosthecobacter|s__Prosthecobacter_unclassified	0	0	0	0	0	0	0	0	0	0	0	0.02001
d__unclassified	0.03201	0.04078	0.36282	0	0.02155	0.07531	0.11231	0.21074	0.45706	0.10656	0.09112	0.00857
d__unclassified|p__unclassified	0.03201	0.04078	0.36282	0	0.02155	0.07531	0.11231	0.21074	0.45706	0.10656	0.09112	0.00857
d__unclassified|p__unclassified|c__unclassified	0.03201	0.04078	0.36282	0	0.02155	0.07531	0.11231	0.21074	0.45706	0.10656	0.09112	0.00857
d__unclassified|p__unclassified|c__unclassified|o__unclassified	0.03201	0.04078	0.36282	0	0.02155	0.07531	0.11231	0.21074	0.45706	0.10656	0.09112	0.00857
d__unclassified|p__unclassified|c__unclassified|o__unclassified|f__unclassified	0.03201	0.04078	0.36282	0	0.02155	0.07531	0.11231	0.21074	0.45706	0.10656	0.09112	0.00857
d__unclassified|p__unclassified|c__unclassified|o__unclassified|f__unclassified|g__unclassified	0.03201	0.04078	0.36282	0	0.02155	0.07531	0.11231	0.21074	0.45706	0.10656	0.09112	0.00857
d__unclassified|p__unclassified|c__unclassified|o__unclassified|f__unclassified|g__unclassified|s__unclassified	0.03201	0.04078	0.36282	0	0.02155	0.07531	0.11231	0.21074	0.45706	0.10656	0.09112	0.00857
